# Supplementary material
Source: PubMed Central journal article supplement (PMC6242278)

## Synthesis of Benzannulated Medium-ring Lactams via a Tandem Oxidative Dearomatization–Ring Expansion Reaction

Tezcan Guney,<sup>a,†</sup> Todd A. Wenderski,<sup>a,†</sup> Matthew W. Boudreau,<sup>b</sup> Derek S. Tan<sup>\*,a, c</sup>

<sup>a</sup>*Chemical Biology Program, Sloan Kettering Institute;*

<sup>b</sup>*Summer Undergraduate Research Program,  
Gerstner Sloan Kettering Graduate School of Biomedical Sciences;*

<sup>c</sup>*Tri-Institutional Research Program  
Memorial Sloan Kettering Cancer Center  
1275 York Avenue, Box 422, New York, New York 10065*

### Supplementary Information

|                                                                                                        |     |
|--------------------------------------------------------------------------------------------------------|-----|
| A. Supplementary Figures 1–10                                                                          | S2  |
| B. Principal component analysis                                                                        | S18 |
| C. Materials and methods                                                                               | S23 |
| D. Synthesis of olefin-containing benzannulated medium ring lactams                                    | S24 |
| E. Synthesis of bicyclic ketone precursors                                                             | S33 |
| F. Synthesis of ketone-containing benzannulated medium-ring lactams                                    | S40 |
| G. Downstream modifications of ODRE scaffolds                                                          | S70 |
| H. X-Ray crystallographic analysis of <i>anti</i> - $\alpha$ -methyl- $\beta$ -hydroxylactam <b>54</b> | S78 |
| I. <sup>1</sup> H-NMR and <sup>13</sup> C-NMR spectra                                                  | S95 |

## A. SUPPLEMENTARY FIGURES 1–10

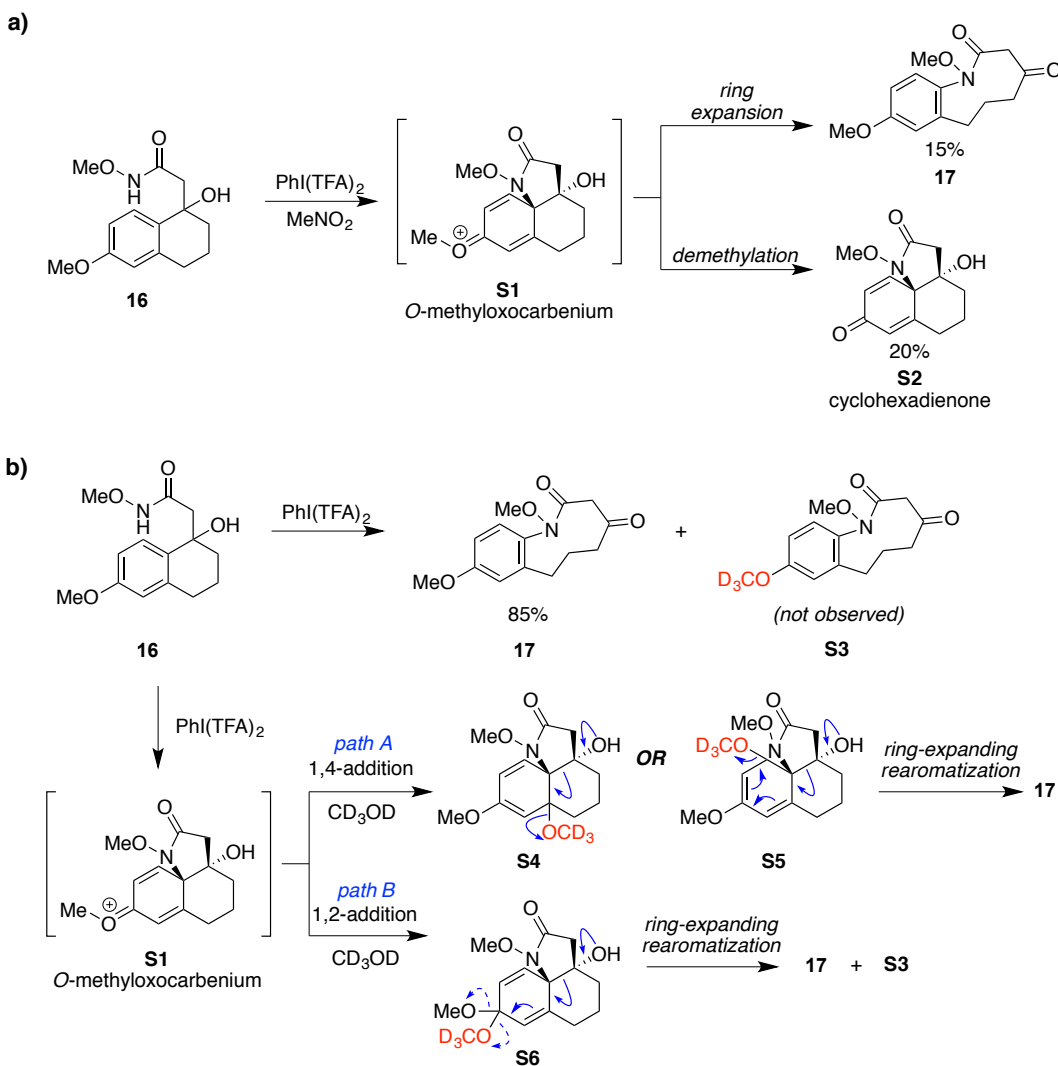

**Supplementary Figure 1.** (a) Treatment of 6-methoxytetralin **16** with PIFA in nitromethane results in a complex mixture from which 9-membered medium-ring lactam **17** and cyclohexadienone **S2** were recovered. The observation of **S2** in the crude mixture indicates the instability of intermediate **S1**, which hinders formation of desired product **17**. (b) Treatment of 6-methoxytetralin **16** with PIFA in methanol- $d_4$  affords lactam **17** in 85% yield. In the proposed mechanism of methanol-facilitated ODRE, treatment of **16** with PIFA generates the *O*-methyloxocarbenium intermediate **S1**, which can undergo either a 1,2- or 1,4-addition in the presence of the nucleophilic solvent methanol- $d_4$ . Although either path A or path B can ultimately lead to the formation of lactam **17** through a nucleophilic addition/ring-expanding rearomatization sequence, conceivably only path A can circumvent deuterium incorporation in **17** as path B is more likely to generate a mixture of deuterated and non-deuterated medium-ring products **17** and **S3**, respectively. Notably, the crude  $^1\text{H-NMR}$  spectrum of the overall reaction as shown above did not show the deuterium-incorporated product **S3**, suggesting that path A is favored over path B in the ODRE cascade. PIFA = (bis(trifluoroacetoxy)iodo)benzene.

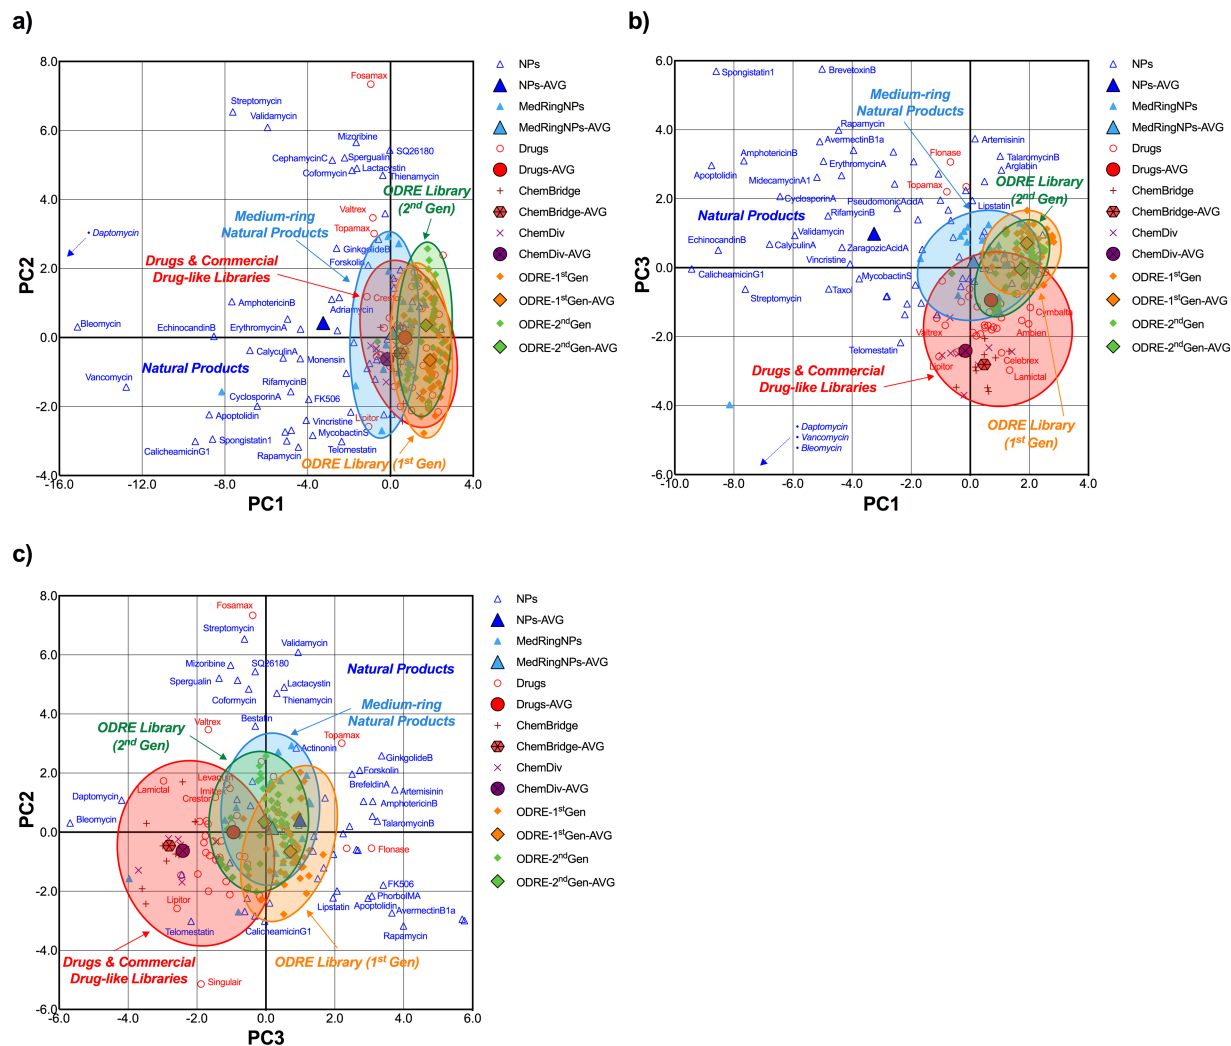

**Supplementary Figure 2. Principal component analysis (PCA) of ODRÉ-derived libraries.** (a) PCA plot of PC1 vs. PC2 (b) PCA plot of PC1 vs. PC3. (c) PCA plot of PC3 vs. PC2. PCA of 41 tandem ODRÉ benzannulated medium rings (ODRE-2<sup>nd</sup> Gen), 47 stepwise ODRÉ benzannulated medium rings<sup>1</sup> (ODRE-1<sup>st</sup> Gen), 20 benzannulated medium ring natural products (MedRingNPs), established reference sets of 40 top-selling brand-name drugs (Drugs), 60 diverse natural products (NPs), and 20 ChemBridge and ChemDiv commercial drug-like library compounds using 20 structural and physicochemical descriptors.<sup>1,2</sup> The hypothetical average structure for each series (-AVG) is also shown. The original 20-dimensional data set is plotted onto two dimensional unitless, orthogonal axes (principal components) that represent linear combinations of the original 20 parameters where PC1–PC3 represents 75% of the total variation. See **Supplementary Data Set 1** for complete data processing.

<sup>1</sup> Bauer, R. A.; Wenderski, T. A.; Tan, D. S. *Nat. Chem. Biol.* **2013**, *9*, 21–29.

<sup>2</sup> Wenderski, T. A.; Stratton, C. F.; Bauer, R. A.; Kopp, F.; Tan, D. S. *Methods Mol. Biol.* **2015**, *1263*, 225–242.

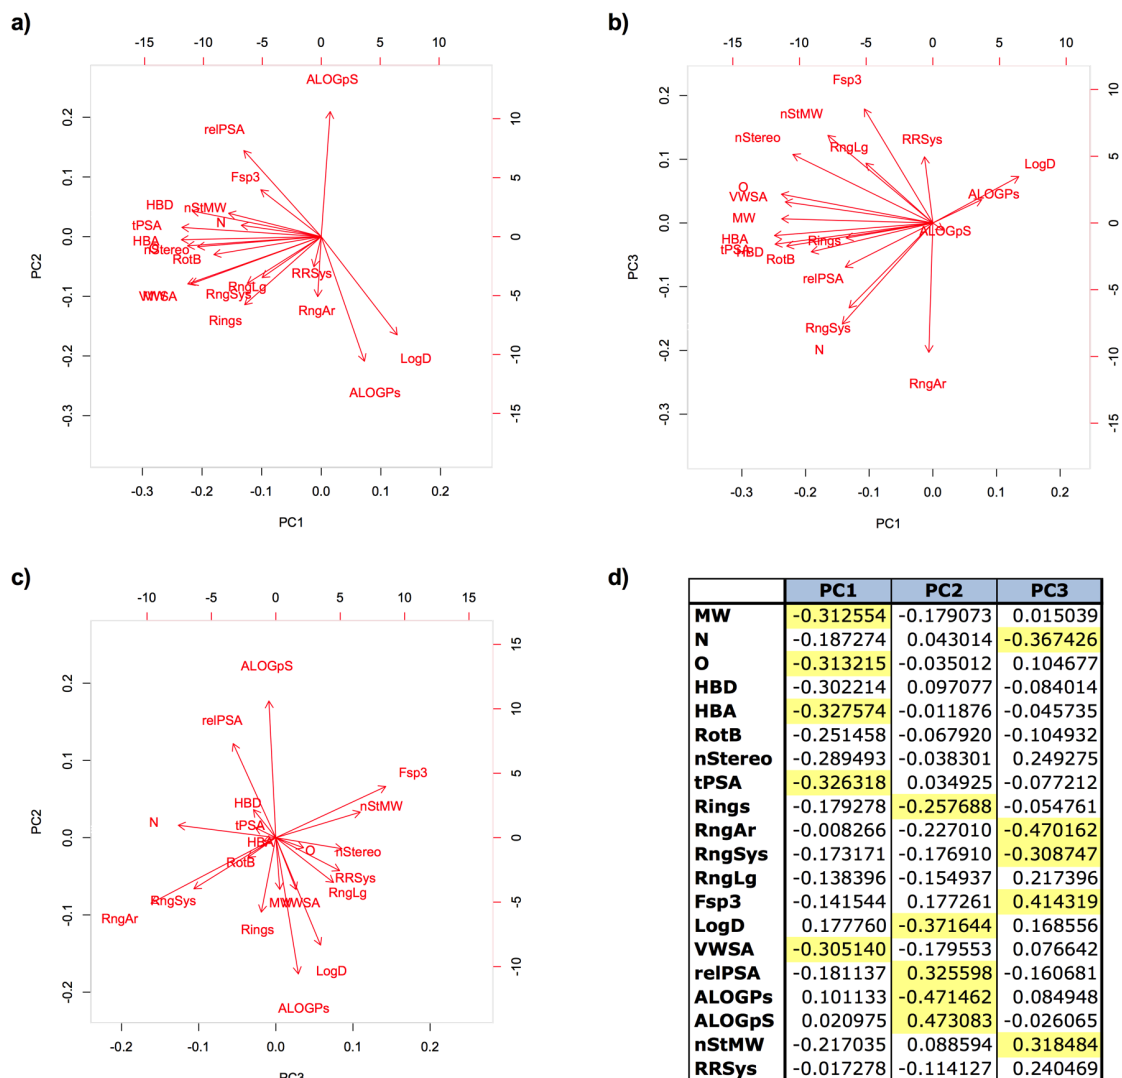

**Supplementary Figure 3. Biplots and component loadings for PCA of tandem and stepwise ODRE libraries with benzannulated medium ring natural products and established reference sets.** The biplots for (a) PC1 vs. PC2 (b) PC1 vs. PC3 (c) PC3 vs. PC2. (d) Component loadings of the 20 structural and physicochemical descriptors for the first three principal components that show the relative influence of each descriptor in the PCA plots. The top five most influential descriptors are highlighted in yellow.

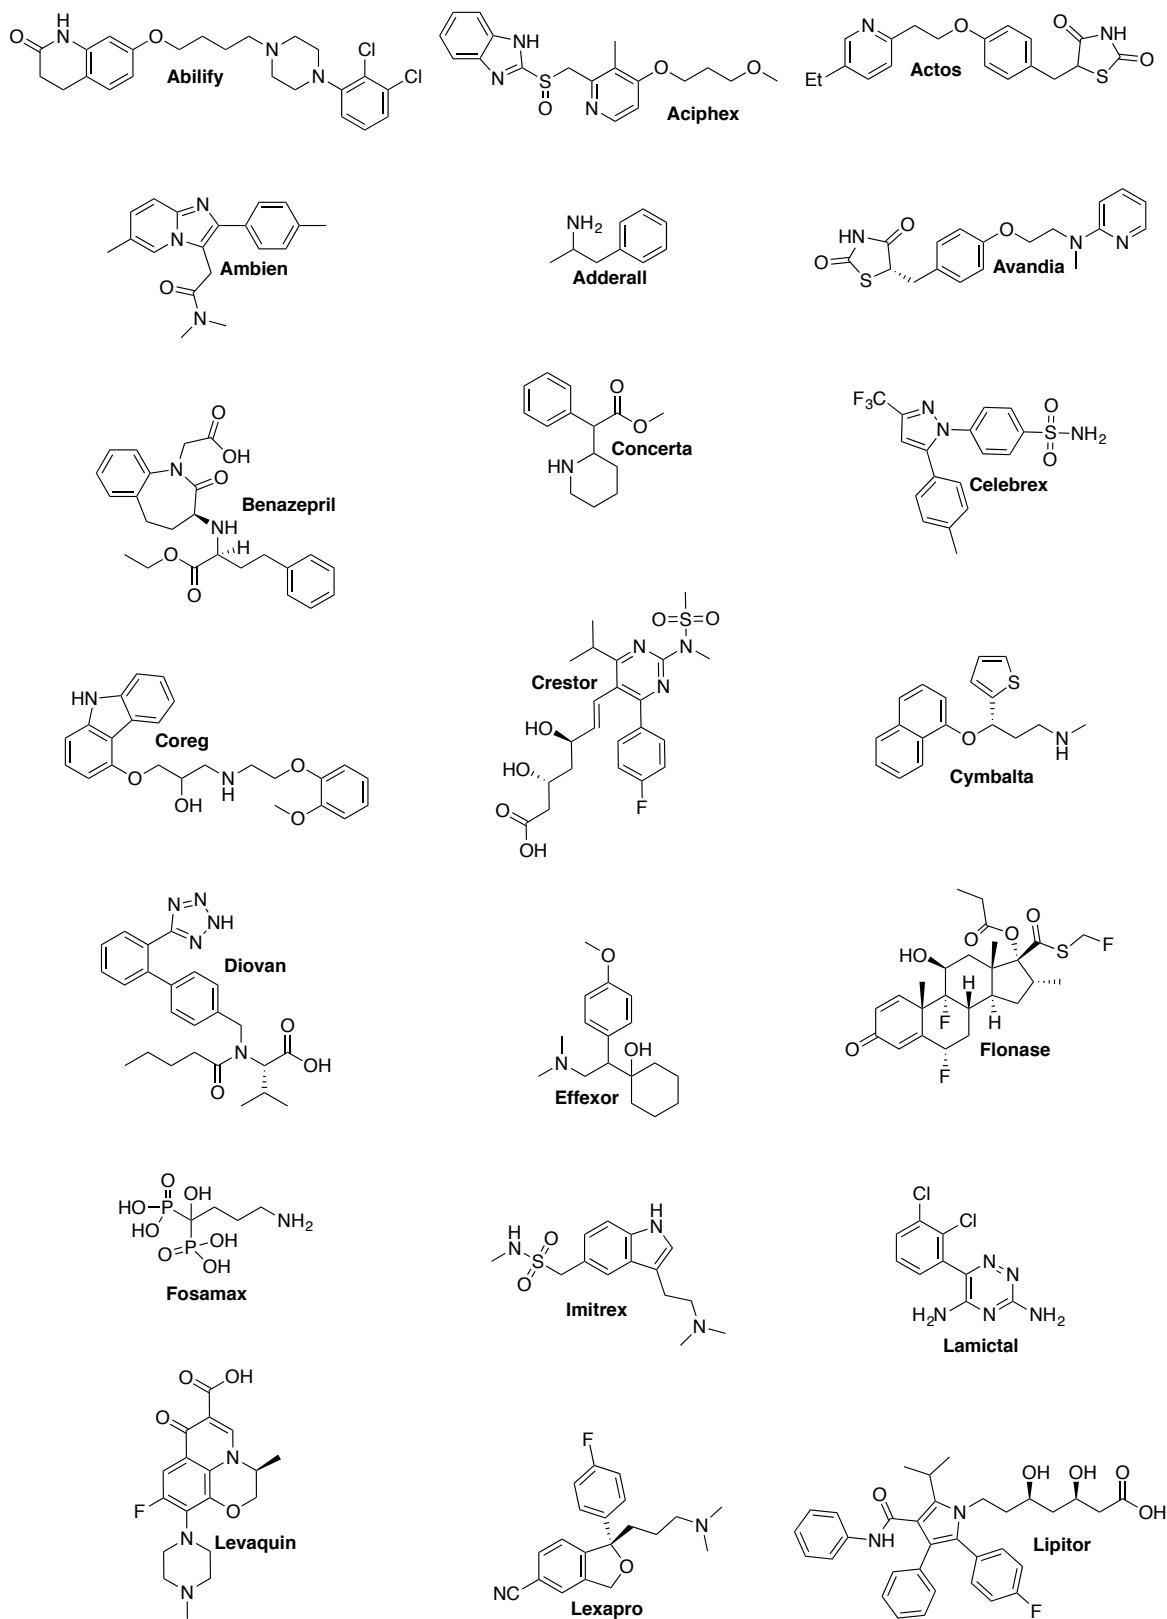

Supplementary Figure 4. Structures of the 40 highest-selling brand-name drugs for PCA.

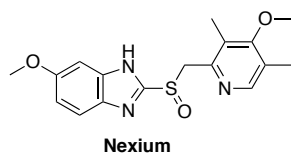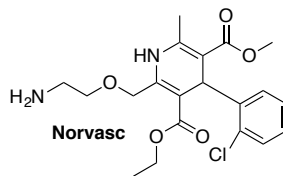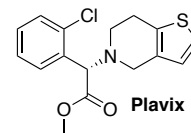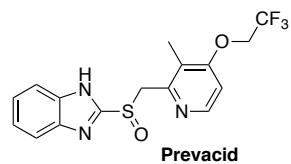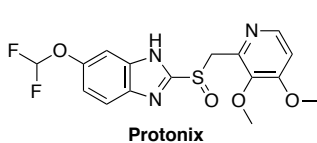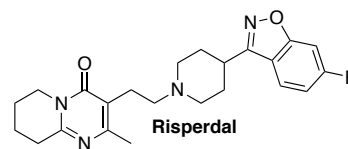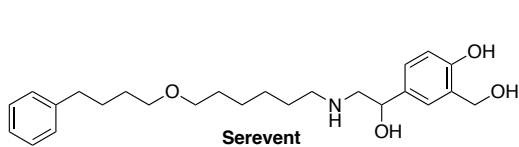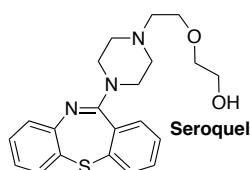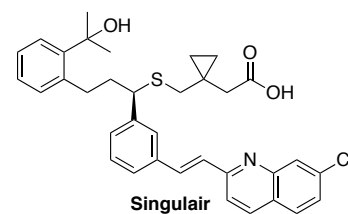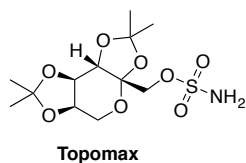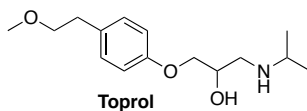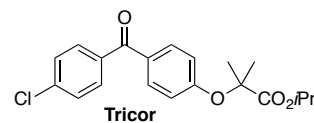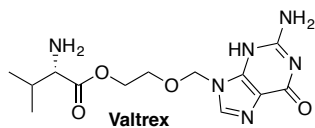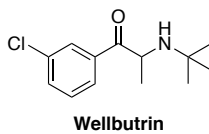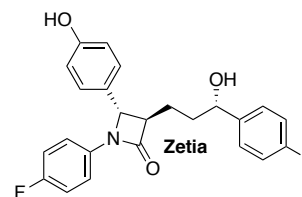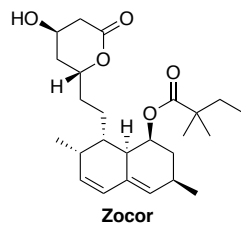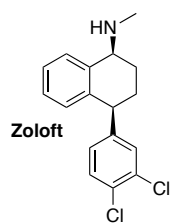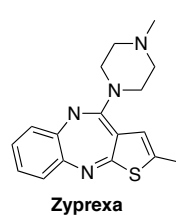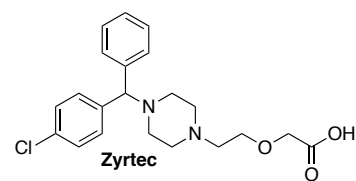

**Supplementary Figure 4. Structures of the 40 highest-selling brand-name drugs for PCA (continued).**

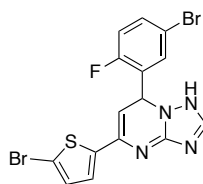

5771496

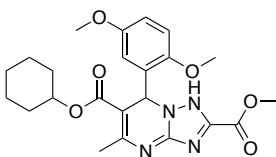

5771429

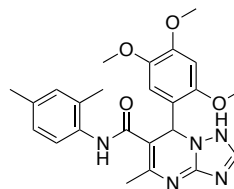

5771374

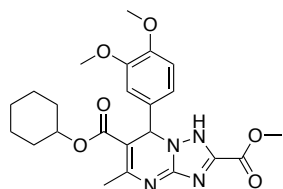

5771371

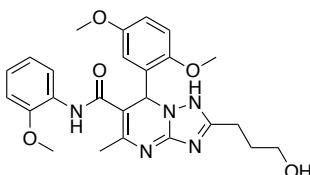

5309975

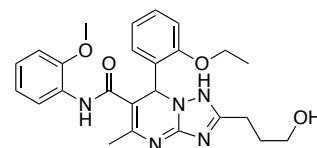

5309772

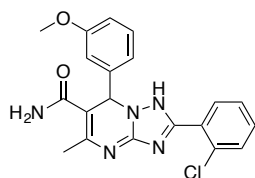

5309762

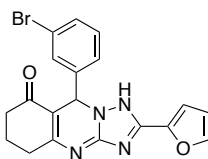

5308431

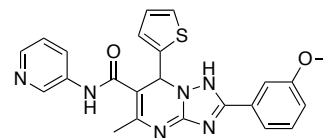

5309246

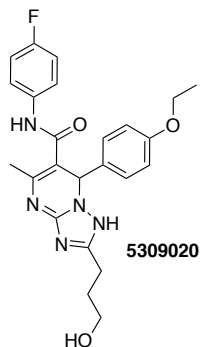

5309020

**Supplementary Figure 5. Structures of 10 commercial drug-like library compounds from ChemBridge used in PCA. (PubChem<sup>3</sup> Compound ID numbers are indicated.)**

<sup>3</sup> For the PubChem database, see: <https://pubchem.ncbi.nlm.nih.gov/search/>

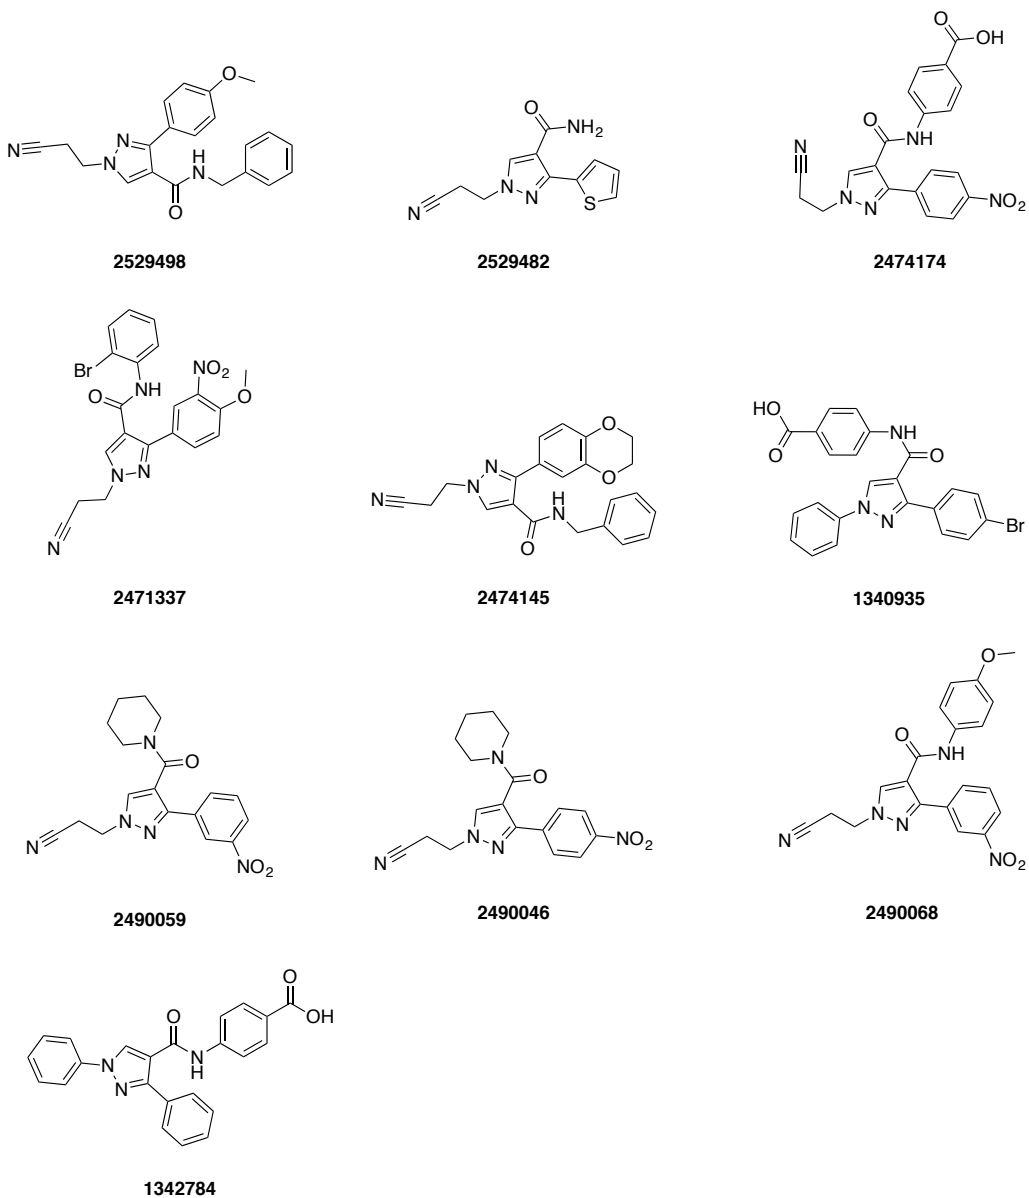

**Supplementary Figure 6. Structures of 10 commercial drug-like library compounds from ChemDiv used in PCA.** (PubChem<sup>3</sup> Compound ID numbers are indicated.)



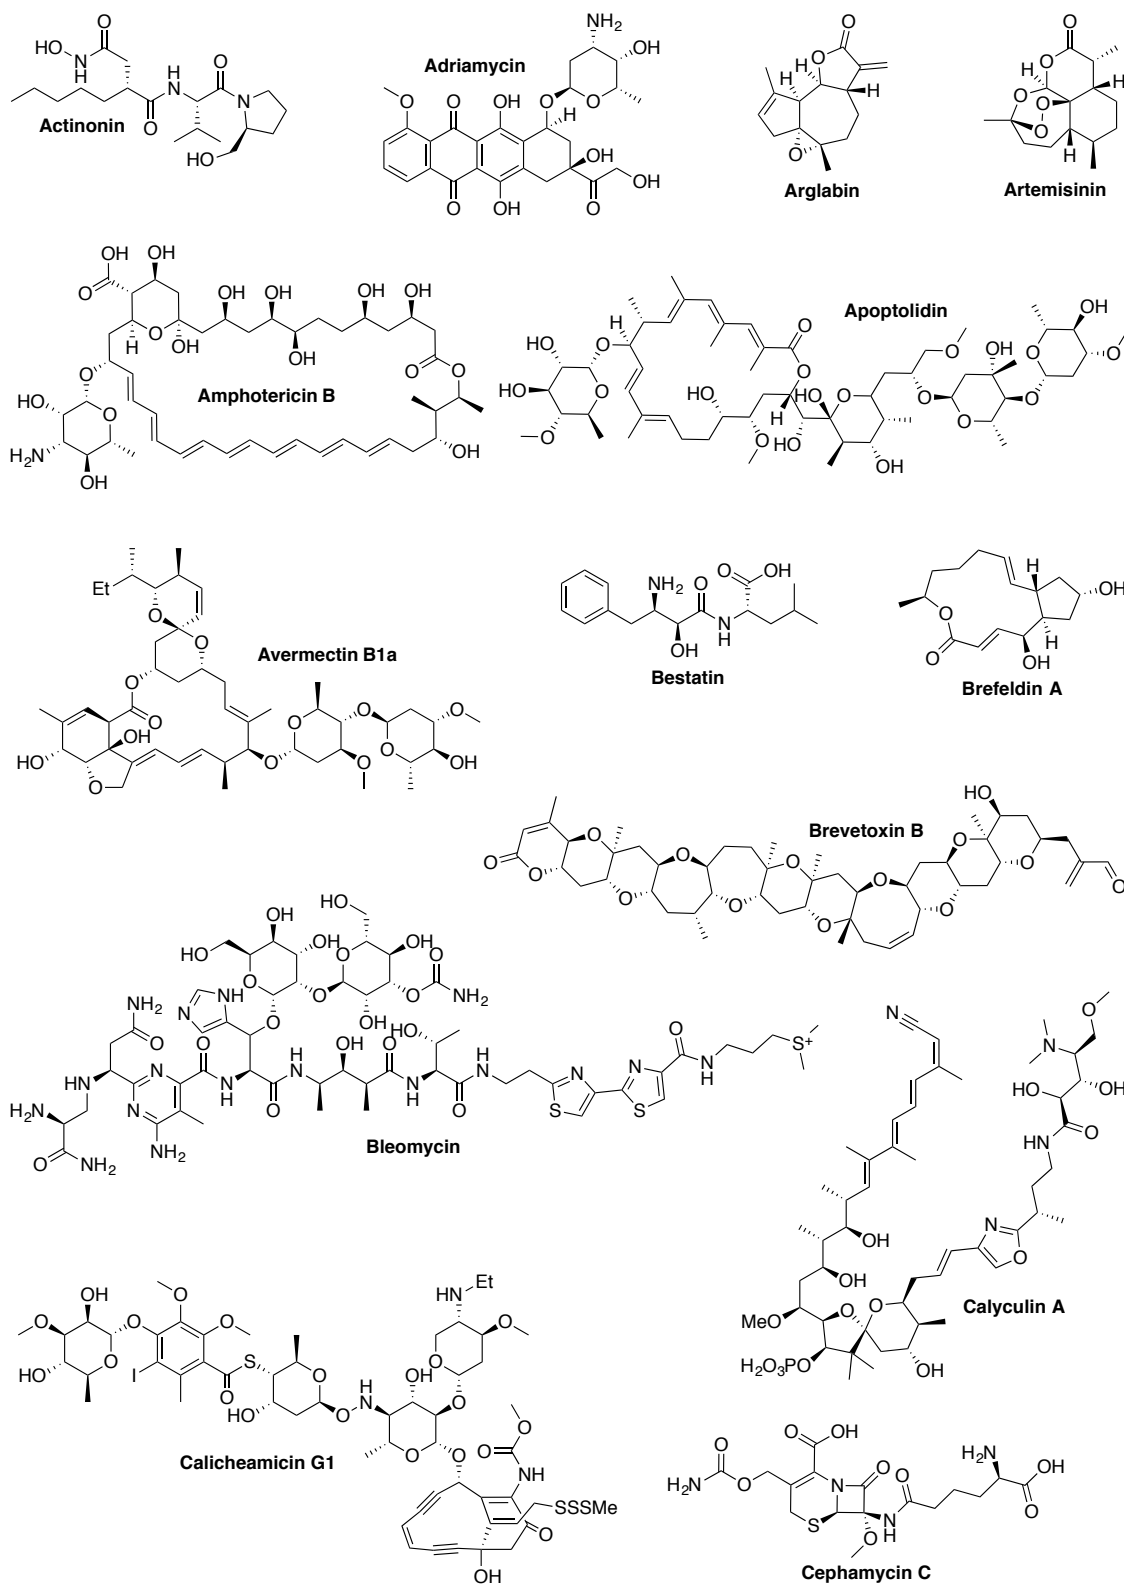

Supplementary Figure 7. Structures of 60 diverse natural products used in PCA.

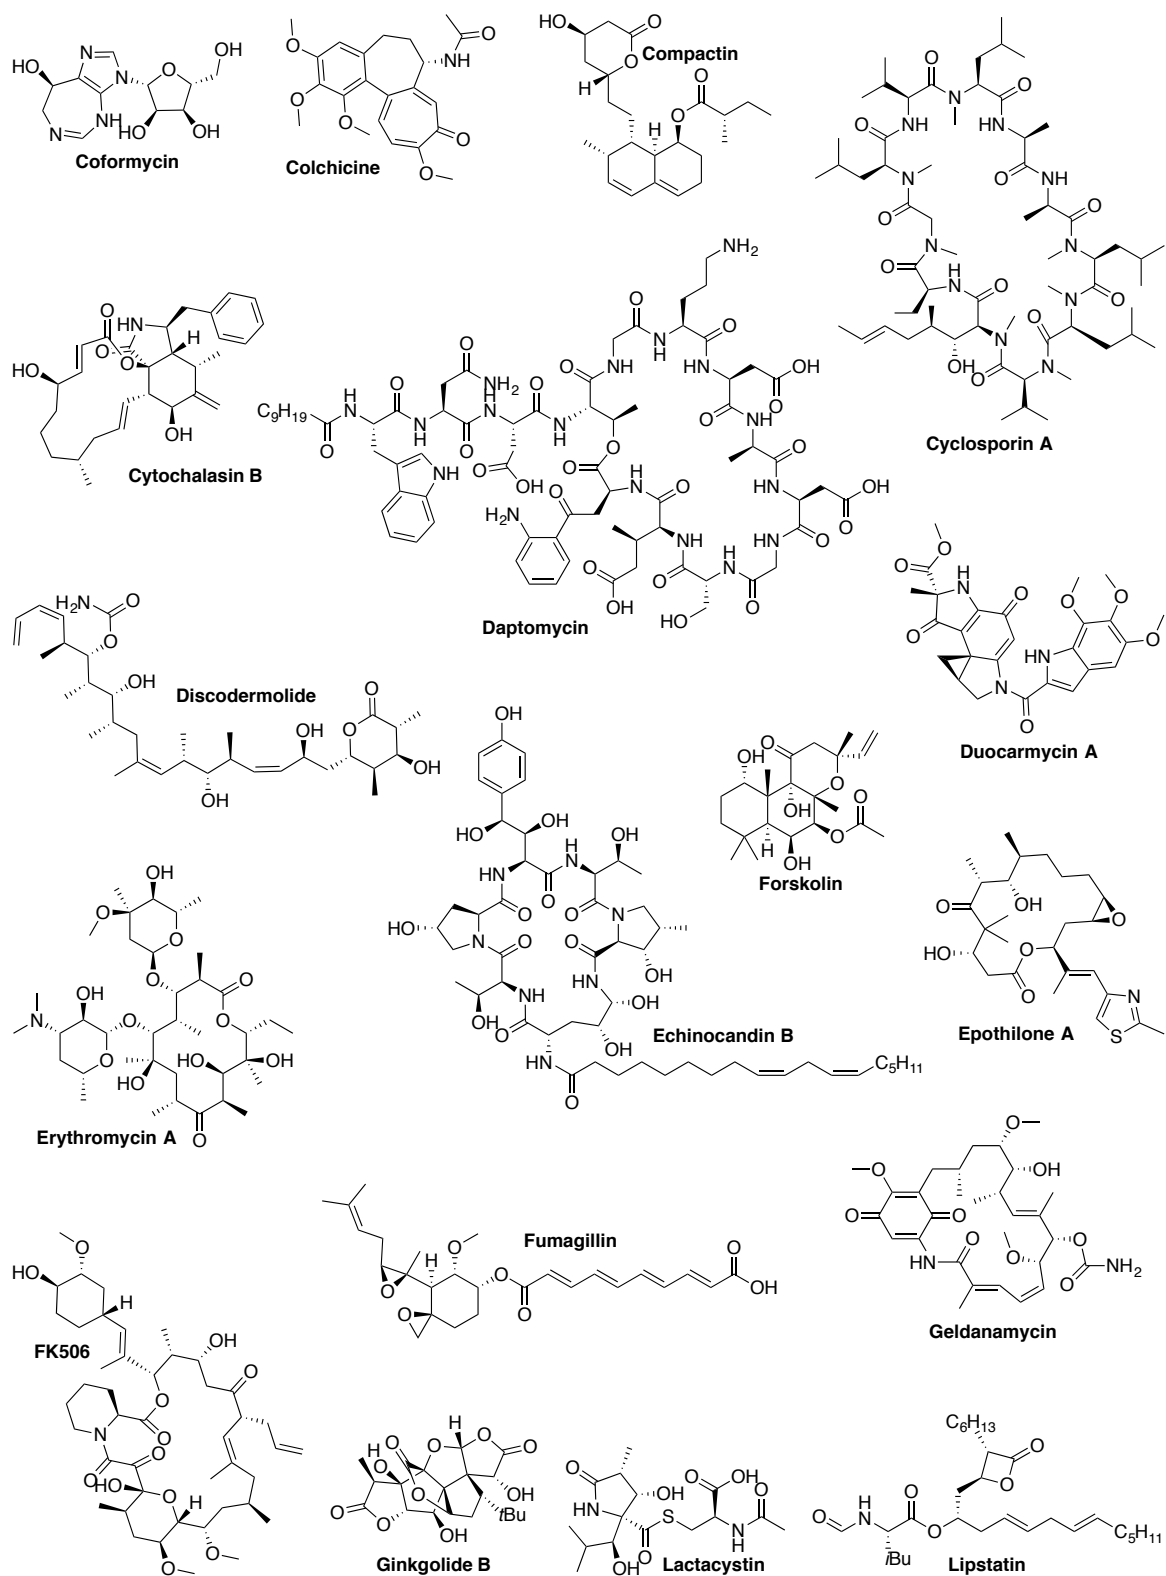

Supplementary Figure 7. Structures of 60 diverse natural products used in PCA (continued).

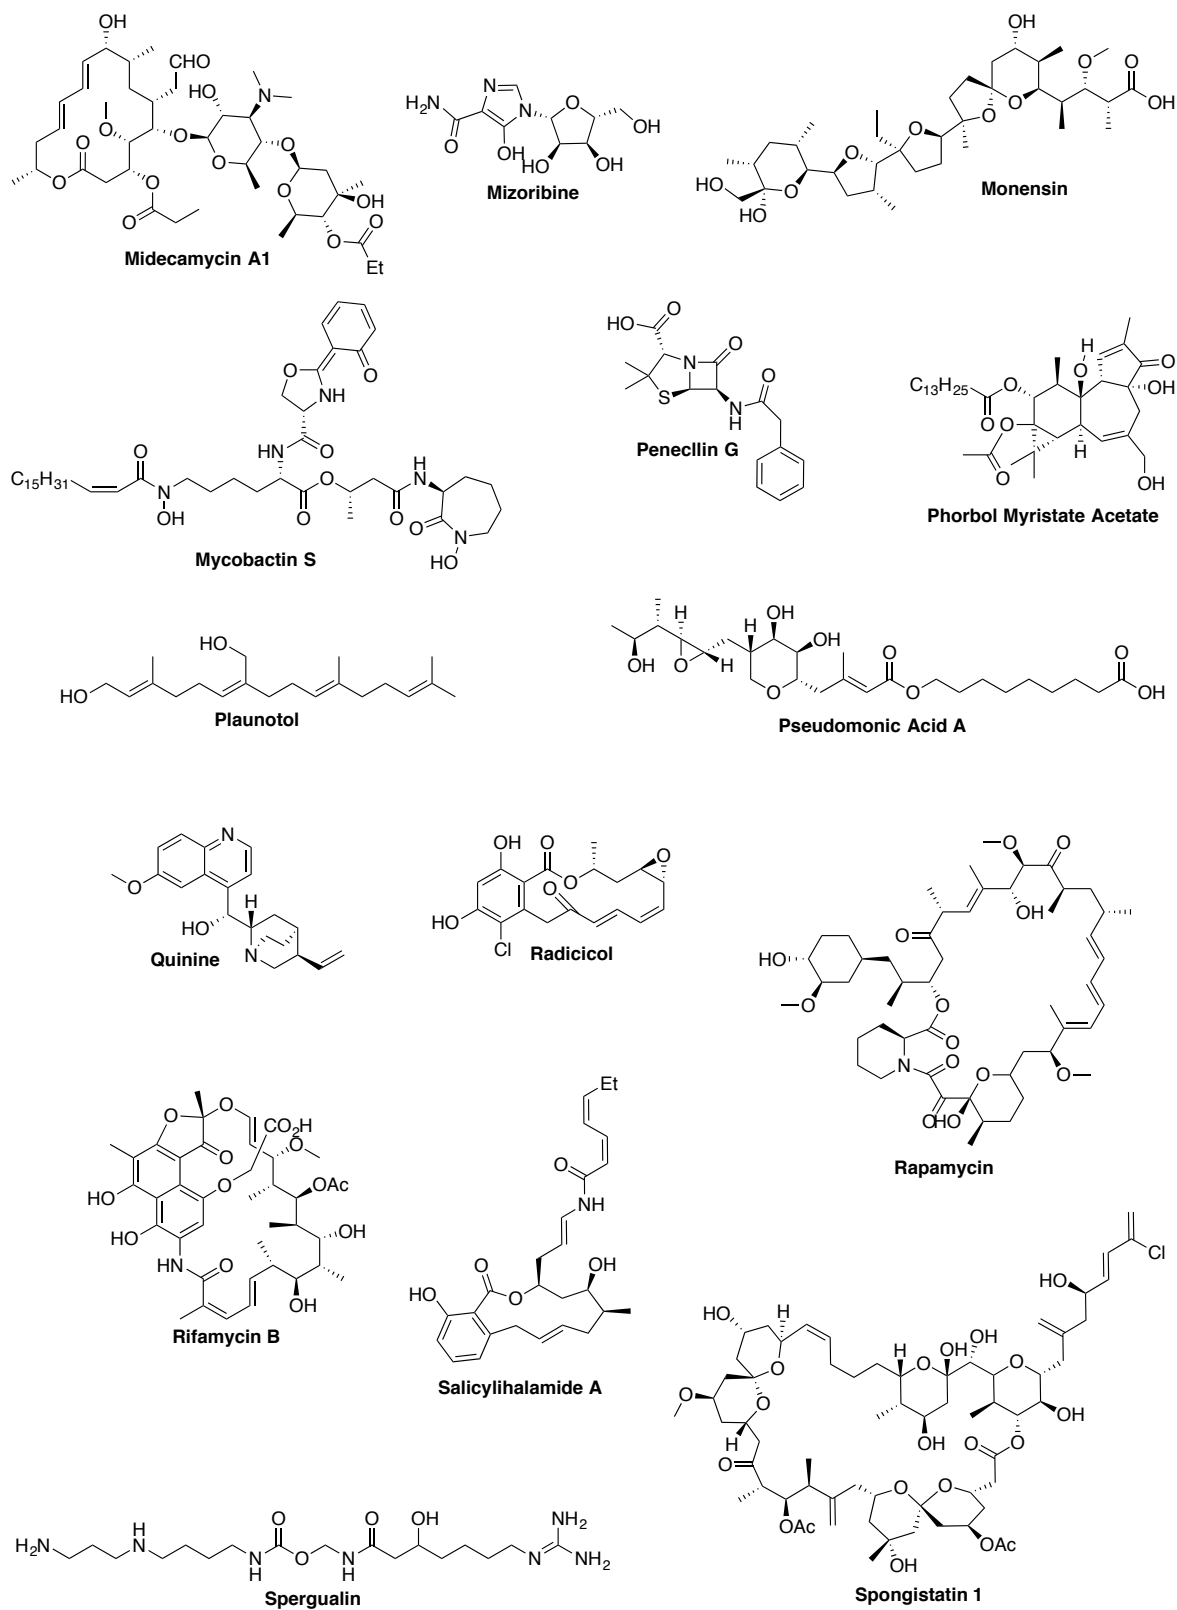

Supplementary Figure 7. Structures of 60 diverse natural products used in PCA (continued).

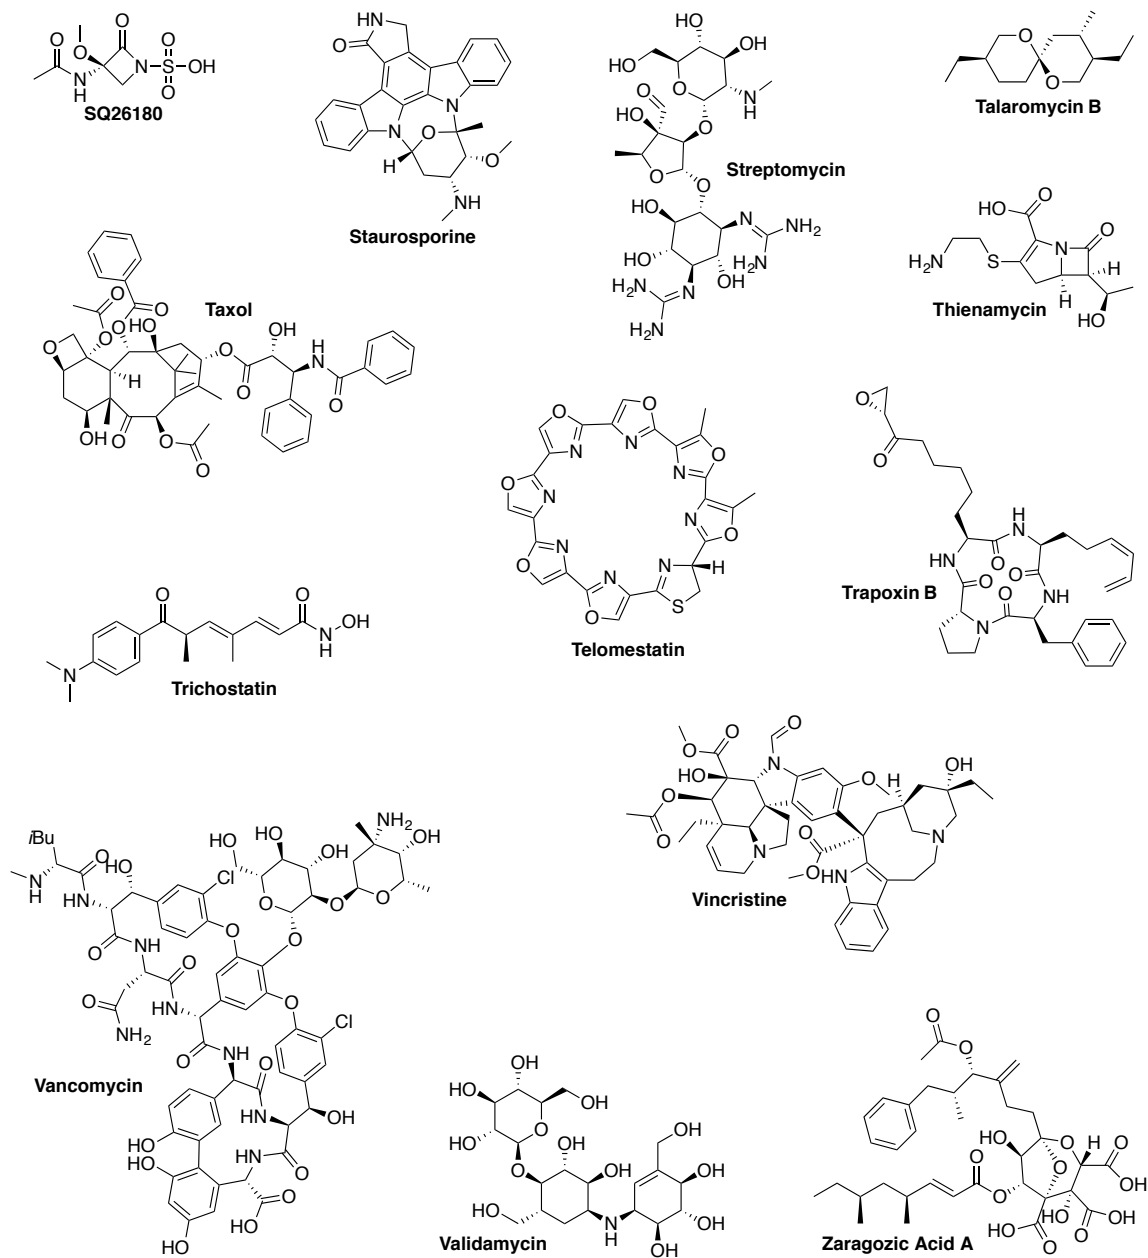

Supplementary Figure 7. Structures of 60 diverse natural products used in PCA (continued).

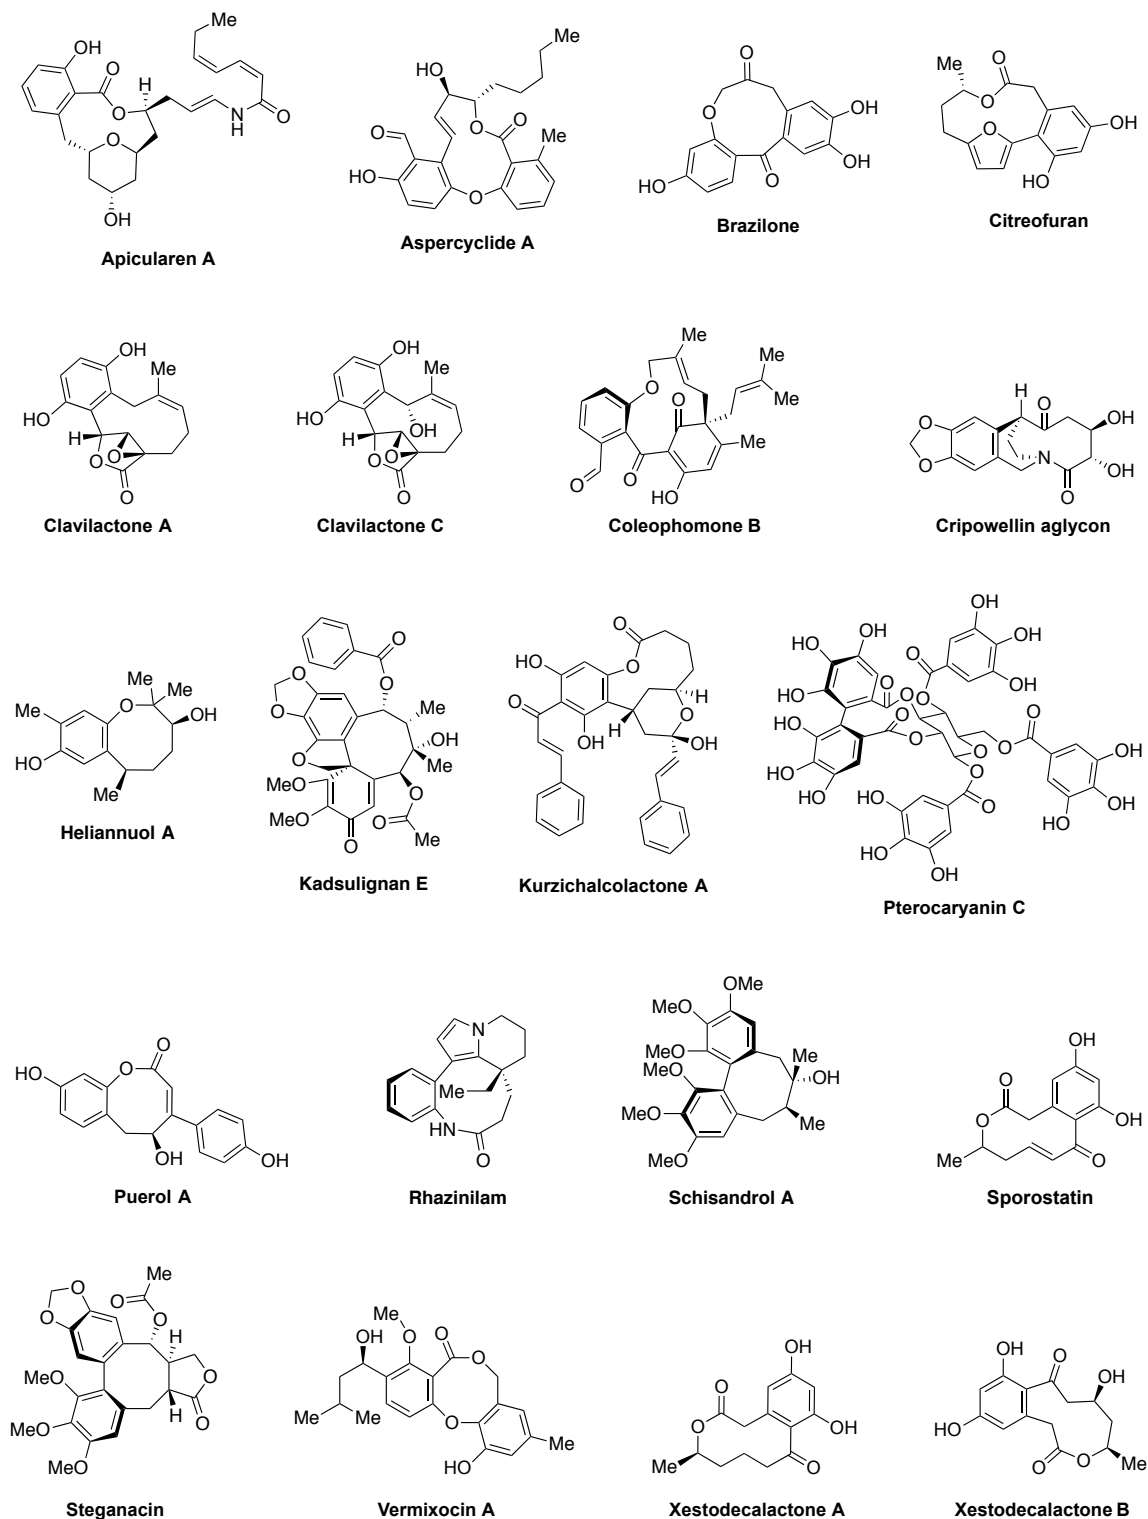

**Supplementary Figure 8. Structures of 20 benzannulated medium ring natural products used in PCA.**

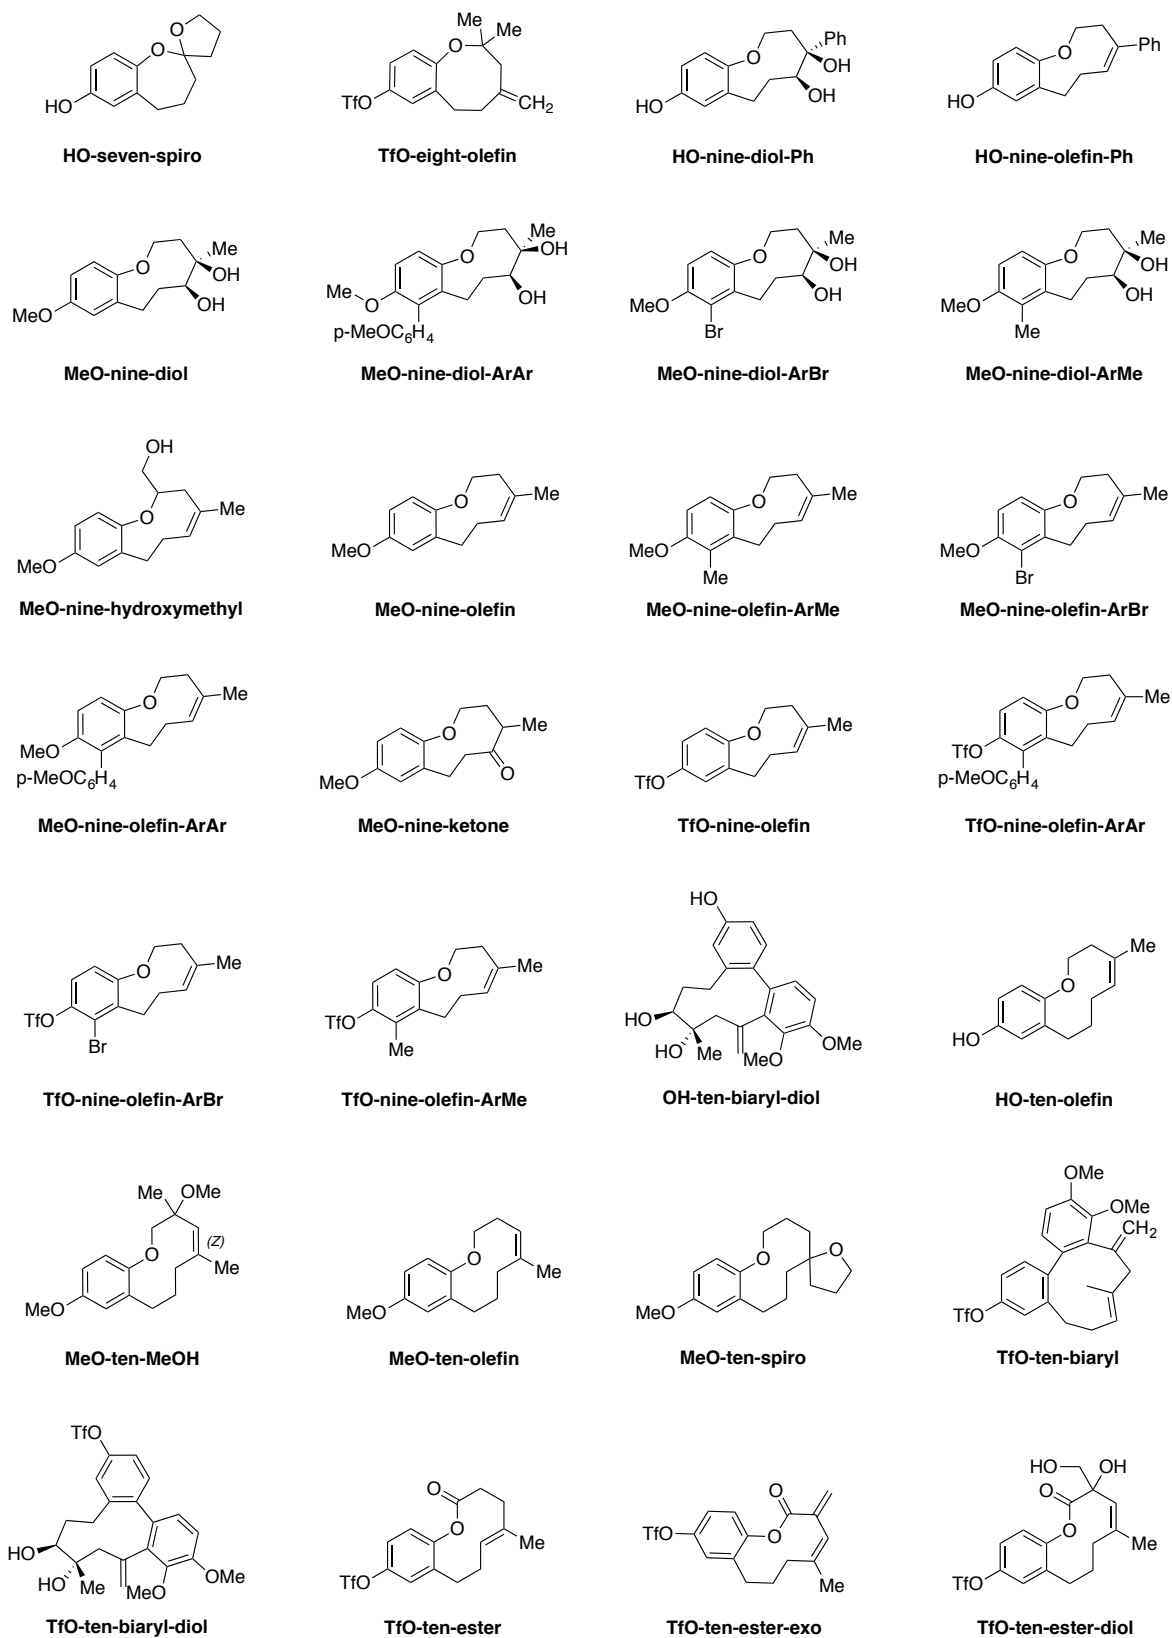

**Supplementary Figure 9. Structures of 47 synthetic benzannulated medium rings derived from stepwise ODRE (1<sup>st</sup> Gen)<sup>1</sup> used in PCA.**

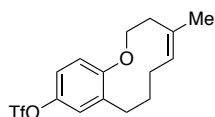

TfO-ten-olefin-5,7

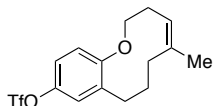

TfO-ten-olefin-6,6

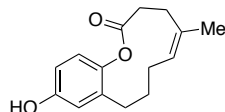

HO-eleven-ester

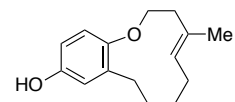

HO-eleven-olefin-5,8

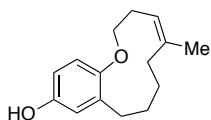

HO-eleven-olefin-6,7

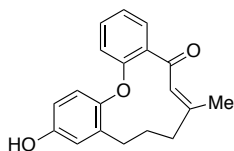

HO-eleven-olefin-ArOAr

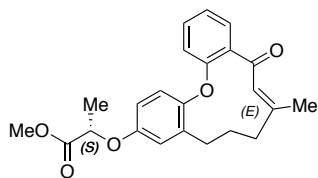

lactate-eleven-olefin-S

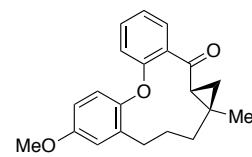

MeO-eleven-cycloprop

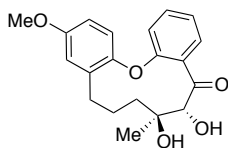

MeO-eleven-diol

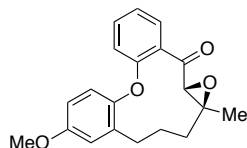

MeO-eleven-epoxidation

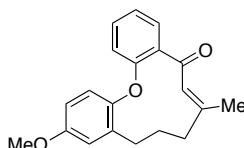

MeO-eleven-olefin

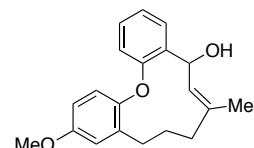

MeO-eleven-reduction

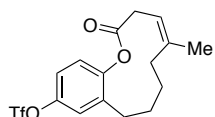

TfO-eleven-ester

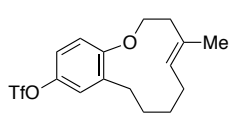

TfO-eleven-olefin-5,8

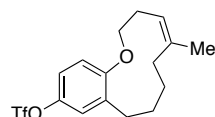

TfO-eleven-olefin-6,7

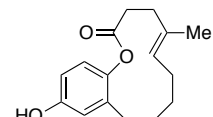

HO-twelve-ester

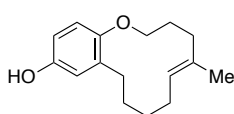

HO-twelve-olefin

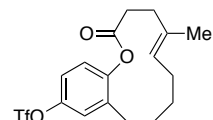

TfO-twelve-ester

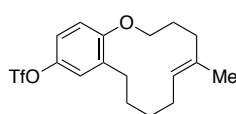

TfO-twelve-olefin

**Supplementary Figure 9. Structures of 47 synthetic benzannulated medium rings derived from stepwise ODRE (1<sup>st</sup> Gen)<sup>1</sup> used in PCA (continued).**

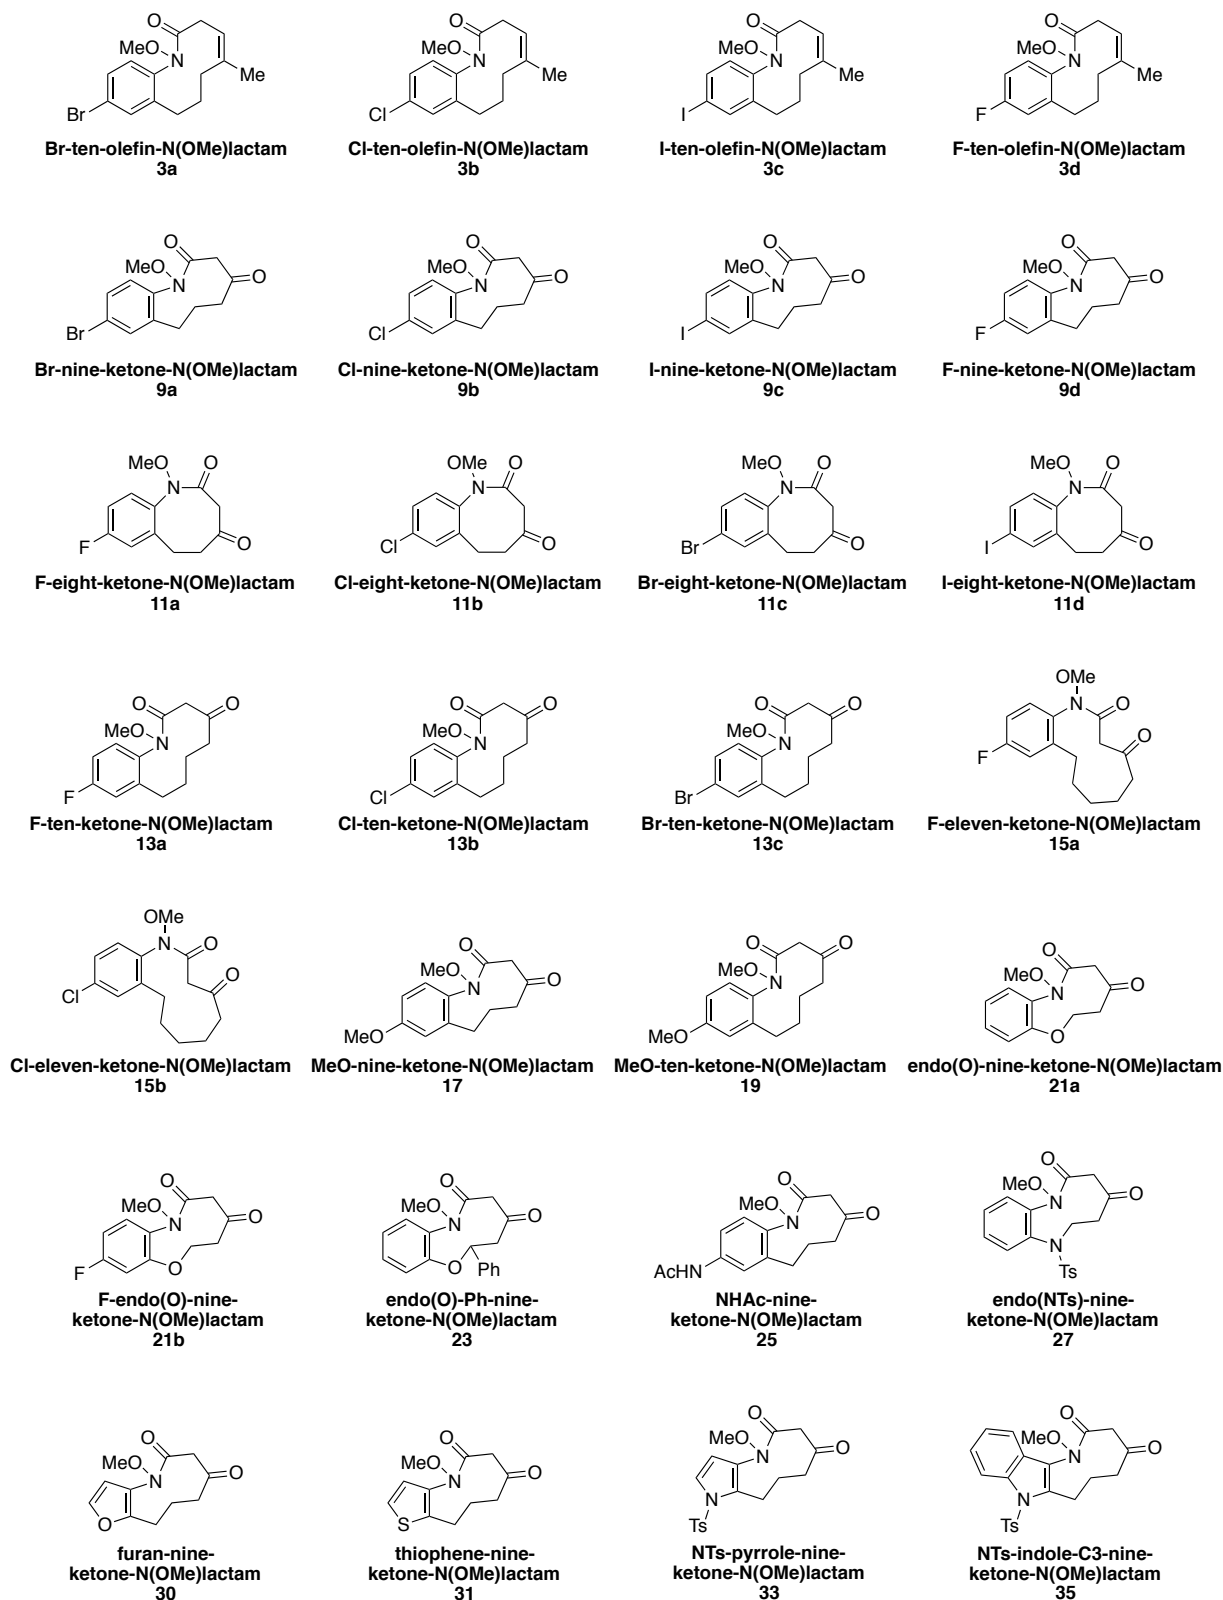

**Supplementary Figure 10. Structures of 41 synthetic benzannulated medium rings derived from tandem ODRE (2<sup>nd</sup> Gen) used in PCA.**



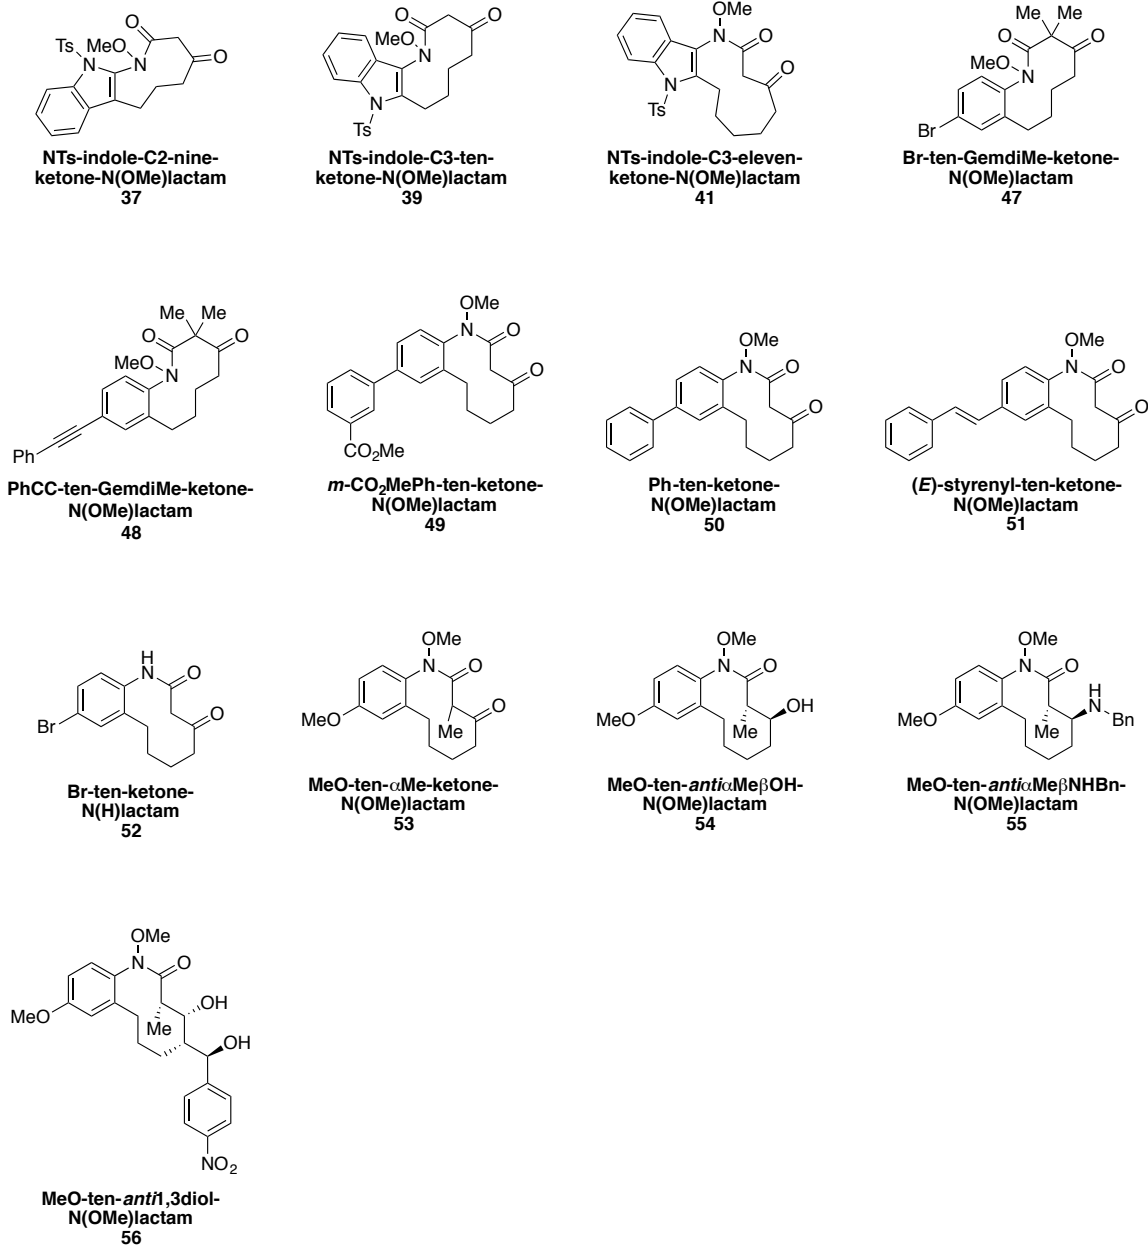

Supplementary Figure 10. Structures of 41 synthetic benzannulated medium rings derived from tandem ODRE (2<sup>nd</sup> Gen) used in PCA (continued).

## B. PRINCIPAL COMPONENT ANALYSIS

Principal component analysis was conducted following the detailed protocols described in the literature.<sup>1,2,4,5,6</sup> The analysis compared the tandem ODRE library members to our original stepwise ODRE products as well as to our previously established reference set of drugs, commercial drug-like library members, and natural products.

### 1. PCA COMPOUND PROFILES

A total of 228 compounds were analyzed by PCA (**Supplementary Fig. 4-10**):

- 40 top-selling brand-name, small-molecule drugs by revenue in 2006<sup>5</sup>
- 10 drug-like pyrrazolecarboxamides in the MLSMR from ChemBridge
- 10 drug-like dihydrotriazolopyrimidines in the MLSMR from ChemDiv
- 60 natural products with diverse structures and biological activities
- 20 benzannulated medium ring natural products
- 47 synthetic benzannulated medium rings derived from stepwise ODRE<sup>1</sup>
- 41 synthetic benzannulated medium ring lactams derived from tandem ODRE (this work)

Average values for each parameter were calculated using Excel within each compound series. These seven hypothetical average molecules for each compound series were also included in the PCA.

**Supplementary Table 1. Compounds analyzed by PCA.**

| Series                                                             | Compounds                    |                |               |               |
|--------------------------------------------------------------------|------------------------------|----------------|---------------|---------------|
| <b>Top Selling Brand-Name Small-Molecule Drugs</b><br>(40 entries) | abilify                      | crestor        | lipitor       | topamax       |
|                                                                    | aciphex                      | cymbalta       | nexium        | toprol        |
|                                                                    | actos                        | diovan         | norvasc       | trikor        |
|                                                                    | adderall                     | effexor        | plavix        | valtrex       |
|                                                                    | ambien                       | flonase        | prevacid      | wellbutrin    |
|                                                                    | avandia                      | fosamax        | protonix      | zetia         |
|                                                                    | benazepril                   | imitrex        | risperdal     | zocor         |
|                                                                    | celebrex                     | lamictal       | serevent      | zoloft        |
|                                                                    | concerta                     | levaquin       | seroquel      | zyprexa       |
|                                                                    | coreg                        | lexapro        | singulair     | zyrtec        |
| <b>ChemBridge Library</b><br>(10 entries)                          | <i>PubChem CIDs:</i> 5771429 | 5771374        | 5309975       | 5308431       |
|                                                                    | 5771496                      | 5771371        | 5309772       | 5309246       |
|                                                                    |                              |                | 5309762       | 5309020       |
| <b>ChemDiv Library</b><br>(10 entries)                             | <i>PubChem CIDs:</i> 2529482 | 2474174        | 2474145       | 2490046       |
|                                                                    | 2529498                      | 2471337        | 1340935       | 2490068       |
|                                                                    |                              |                | 2490059       | 1342784       |
| <b>Natural Products</b><br>(60 entries)                            | actinonin                    | colchicine     | lactacystin   | spergualin    |
|                                                                    | adriamycin                   | compactin      | lipstatin     | spongistatin1 |
|                                                                    | amphotericinb                | cyclosporina   | midecamycina1 | sq26180       |
|                                                                    | apoptolidin                  | cytochalasinb  | mizoribine    | staurosporine |
|                                                                    | arglabin                     | daptomycin     | monensin      | streptomycin  |
|                                                                    | artemisinin                  | discodermolide | mycobactins   | talaromycinb  |

<sup>4</sup> Kopp, F.; Stratton, C. F.; Akella, L. B.; Tan, D. S. *Nat. Chem. Biol.* **2012**, *8*, 358–365.

<sup>5</sup> Moura-Letts, G.; DiBlasi, C. M.; Bauer, R. A.; Tan, D. S. *Proc. Natl. Acad. Sci. U. S. A.* **2011**, *108*, 6745–6750.

<sup>6</sup> Bauer, R. A.; Wurst, J. M.; Tan, D. S. *Curr. Opin. Chem. Biol.* **2010**, *14*, 308–314.

|                                                                                                                  |                         |                        |                      |                      |
|------------------------------------------------------------------------------------------------------------------|-------------------------|------------------------|----------------------|----------------------|
|                                                                                                                  | avermectinb1a           | duocarmycina           | penicilling          | taxol                |
|                                                                                                                  | bestatin                | echinocandinB          | phorbolma            | telomestatin         |
|                                                                                                                  | bleomycin               | epothilonea            | plaunotol            | thienamycin          |
|                                                                                                                  | brefeldina              | erythromycina          | pseudomonicacida     | trapoxinb            |
|                                                                                                                  | brevetoxinb             | fk506                  | quinine              | trichostatin         |
|                                                                                                                  | calicheamicing1         | forskolin              | radicol              | validamycin          |
|                                                                                                                  | calyculina              | fumagillin             | rapamycin            | vancomycin           |
|                                                                                                                  | cephamycinc             | geldanamycin           | rifamycinb           | vincristine          |
|                                                                                                                  | coformycin              | ginkgolideb            | salicylihalamidea    | zaragozicacida       |
| <b>Benzannulated<br/>Medium Ring<br/>Natural<br/>Products<br/>(20 entries)</b>                                   | apicularenA             | clavilactoneC          | kurzichalcolactoneA  | sporostatin          |
|                                                                                                                  | aspercyclideA           | coleophomoneB          | pterocaryaninC       | steganacin           |
|                                                                                                                  | brazilone               | cripowellinaglycon     | puerolA              | vermixocinA          |
|                                                                                                                  | citreofuran             | heliannuolA            | rhazinilam           | xestodecalactoneA    |
|                                                                                                                  | clavilactoneA           | kadsulignanE           | schisandrolA         | xestodecalactoneB    |
| <b>Benzannulated<br/>Medium Ring<br/>Library Derived<br/>from Stepwise<br/>ODRE<br/>(47 entries)<sup>1</sup></b> | HO-eleven-ester         | MeO-eleven-cycloprop   | MeO-nine-olefin-ArAr | TfO-nine-olefin-ArBr |
|                                                                                                                  | HO-eleven-olefin-58     | MeO-eleven-diol        | MeO-nine-olefin-ArBr | TfO-nine-olefin-ArMe |
|                                                                                                                  | HO-eleven-olefin-67     | MeO-eleven-epoxidation | MeO-nine-olefin-ArMe | TfO-ten-biaryl       |
|                                                                                                                  | HO-eleven-olefin-ArOAr  | MeO-eleven-olefin      | MeO-ten-MeOH         | TfO-ten-biaryl-diol  |
|                                                                                                                  | HO-nine-diol-Ph         | MeO-eleven-reduction   | MeO-ten-olefin       | TfO-ten-ester        |
|                                                                                                                  | HO-nine-olefin-Ph       | MeO-nine-diol          | MeO-ten-spiro        | TfO-ten-ester-diol   |
|                                                                                                                  | HO-seven-spiro          | MeO-nine-diol-ArAr     | TfO-eight-olefin     | TfO-ten-ester-exo    |
|                                                                                                                  | HO-ten-biaryl-diol      | MeO-nine-diol-ArBr     | TfO-eleven-ester     | TfO-ten-olefin-57    |
|                                                                                                                  | HO-ten-olefin           | MeO-nine-diol-ArMe     | TfO-eleven-olefin-58 | TfO-ten-olefin-66    |
|                                                                                                                  | HO-twelve-ester         | MeO-nine-hydroxymethyl | TfO-eleven-olefin-67 | TfO-twelve-ester     |
|                                                                                                                  | HO-twelve-olefin        | MeO-nine-ketone        | TfO-nine-olefin      | TfO-twelve-olefin    |
|                                                                                                                  | lactate-eleven-olefin-S | MeO-nine-olefin        | TfO-nine-olefin-ArAr |                      |
| <b>Benzannulated<br/>Medium Ring<br/>Library Derived<br/>from Tandem<br/>ODRE<br/>(41 entries)</b>               | <b>3a</b>               | <b>11d</b>             | <b>25</b>            | <b>49</b>            |
|                                                                                                                  | <b>3b</b>               | <b>13a</b>             | <b>27</b>            | <b>50</b>            |
|                                                                                                                  | <b>3c</b>               | <b>13b</b>             | <b>30</b>            | <b>51</b>            |
|                                                                                                                  | <b>3d</b>               | <b>13c</b>             | <b>31</b>            | <b>52</b>            |
|                                                                                                                  | <b>9a</b>               | <b>15a</b>             | <b>33</b>            | <b>53</b>            |
|                                                                                                                  | <b>9b</b>               | <b>15b</b>             | <b>35</b>            | <b>54</b>            |
|                                                                                                                  | <b>9c</b>               | <b>17</b>              | <b>37</b>            | <b>55</b>            |
|                                                                                                                  | <b>9d</b>               | <b>19</b>              | <b>39</b>            | <b>56</b>            |
|                                                                                                                  | <b>11a</b>              | <b>21a</b>             | <b>41</b>            |                      |
|                                                                                                                  | <b>11b</b>              | <b>21b</b>             | <b>47</b>            |                      |
|                                                                                                                  | <b>11c</b>              | <b>23</b>              | <b>48</b>            |                      |

**Supplementary Table 2. Average structural and physicochemical parameters by compound series.**

| AVGs           | Drugs | NPs   | ChemBridge | ChemDiv | MedRingNPs | ODRE_1st Gen | ODRE_2nd Gen |
|----------------|-------|-------|------------|---------|------------|--------------|--------------|
| <b>MW</b>      | 361.0 | 629.0 | 381.5      | 446.5   | 385.7      | 319.6        | 319.7        |
| <b>N</b>       | 2.2   | 2.6   | 4.3        | 4.7     | 0.2        | 0.0          | 1.2          |
| <b>O</b>       | 2.9   | 9.7   | 3.1        | 3.4     | 6.8        | 3.7          | 3.5          |
| <b>HBD</b>     | 1.5   | 4.9   | 1.1        | 1.9     | 2.7        | 0.7          | 0.1          |
| <b>HBA</b>     | 5.4   | 10.8  | 5.9        | 7.7     | 6.8        | 3.0          | 3.5          |
| <b>RotB</b>    | 6.3   | 9.7   | 5.3        | 6.1     | 2.7        | 1.9          | 1.7          |
| <b>nStereo</b> | 1.4   | 9.1   | 0.0        | 1.0     | 2.3        | 0.6          | 0.2          |
| <b>tPSA</b>    | 68.9  | 183.2 | 102.9      | 93.6    | 106.7      | 49.7         | 55.9         |
| <b>Rings</b>   | 2.9   | 3.8   | 3.2        | 4.2     | 3.6        | 2.4          | 2.4          |
| <b>RngAr</b>   | 2.1   | 1.0   | 2.9        | 2.9     | 1.8        | 1.3          | 1.4          |
| <b>RngSys</b>  | 2.1   | 2.0   | 3.1        | 3.1     | 1.5        | 1.1          | 1.3          |
| <b>RngLg</b>   | 5.9   | 11.1  | 5.9        | 6.0     | 9.4        | 10.0         | 9.5          |
| <b>Fsp3</b>    | 0.4   | 0.6   | 0.2        | 0.3     | 0.4        | 0.4          | 0.4          |
| <b>LogD</b>    | 1.7   | 0.5   | 2.2        | 2.6     | 2.8        | 4.2          | 3.1          |
| <b>VWSA*</b>   | 5.3   | 9.3   | 5.0        | 5.8     | 5.3        | 4.6          | 4.5          |
| <b>reIPSA</b>  | 0.1   | 0.2   | 0.2        | 0.2     | 0.2        | 0.1          | 0.1          |
| <b>ALOGPs</b>  | 2.8   | 2.1   | 3.3        | 2.7     | 2.7        | 4.0          | 2.3          |
| <b>ALOGpS</b>  | -3.9  | -3.8  | -4.0       | -3.8    | -3.5       | -4.3         | -3.4         |
| <b>nStMW**</b> | 3.7   | 13.9  | 0.0        | 0.0     | 5.8        | 1.6          | 0.7          |
| <b>RRSys</b>   | 1.4   | 2.3   | 1.0        | 1.4     | 2.9        | 2.2          | 1.9          |

Adjustments made for clarity:

\* =  $VWSA \div 100$ \*\* =  $nStMW \times 1000$

## 2. PCA DESCRIPTORS

A set of 20 physicochemical descriptors (**Supplementary Table 3**) for all 228 compounds was obtained from PubChem and/or calculated using cheminformatics tools (Instant JChem<sup>7</sup> and VCCLab<sup>8,9</sup>) and ChemDraw. The resulting Excel spreadsheet (**Supplementary Data Set 1**) was used in the cheminformatic analysis of 228 compounds.

**Supplementary Table 3. 20 structural and physicochemical descriptors.**

| Parameter      | Description                                     | Method of Determination                                   |
|----------------|-------------------------------------------------|-----------------------------------------------------------|
| <b>MW</b>      | molecular weight                                | Instant JChem                                             |
| <b>N</b>       | number of nitrogens                             | Instant JChem                                             |
| <b>O</b>       | number of oxygens                               | Instant JChem                                             |
| <b>HBD</b>     | number of hydrogen bond donors                  | Instant JChem                                             |
| <b>HBA</b>     | number of hydrogen bond acceptors               | Instant JChem                                             |
| <b>RotB</b>    | number of rotatable bonds                       | Instant JChem                                             |
| <b>nStereo</b> | number of stereocenters                         | Instant JChem                                             |
| <b>tPSA</b>    | topological polar surface area                  | Instant JChem                                             |
| <b>Rings</b>   | number of rings                                 | Instant JChem                                             |
| <b>RngAr</b>   | number of aromatic rings                        | Instant JChem                                             |
| <b>RngSys</b>  | number of ring systems                          | Instant JChem                                             |
| <b>RngLg</b>   | number of atoms in largest ring outline         | Instant JChem                                             |
| <b>Fsp3</b>    | fraction of sp <sup>3</sup> -hybridized carbons | Instant JChem                                             |
| <b>LogD</b>    | calc n-octanol/water distribution coefficient   | Instant JChem                                             |
| <b>VWSA</b>    | Van der Waals surface area                      | Instant JChem                                             |
| <b>relPSA</b>  | relative polar surface area                     | Instant JChem                                             |
| <b>ALOGPs</b>  | calc n-octanol/water partition coeff (alt)      | <a href="http://www.vcclab.org">http://www.vcclab.org</a> |
| <b>ALOGpS</b>  | calculated aqueous solubility                   | <a href="http://www.vcclab.org">http://www.vcclab.org</a> |
| <b>nStMW</b>   | nStereo ÷ MW (stereochemical density)           | Microsoft Excel                                           |
| <b>RRSys</b>   | Rings ÷ RngSys (ring complexity)                | Microsoft Excel                                           |

<sup>7</sup> For Instant JChem; see: <https://www.chemaxon.com/>

<sup>8</sup> Tetko, I.V. Virtual Computational Chemistry Laboratory; <http://www.vcclab.org/lab/alogps/>

<sup>9</sup> Tetko, I.V.; Tanchuk, V.Y.; Kasheva, T.N.; Villa, A.E.P. *J. Chem. Inf. Comput. Sci.* **2001**, *41*, 246–252.

### 3. PCA PLOTS

Following the computational protocol described in the literature,<sup>1,2</sup> the first three principal components (PC1–PC3) were obtained using R, an open source statistical computing package.<sup>10</sup> These top three principal components account for 74.6% of the cumulative variance in the complete data set (**Supplementary Table 4** and **Supplementary Data Set 1**). They were then plotted on newly generated, unitless, orthogonal axes (principal components) that are based on linear combinations of the original 20 parameters (**Supplementary Table 3**, and **Supplementary Data Set 1**). The PCA graphs shown in **Supplementary Fig. 2** were generated using an alternative data visualization software called Prism.<sup>11</sup>

**Supplementary Table 4. Standard deviation and contribution for each principal component in PCA plot (summary information from R).**

|                               | PC1   | PC2   | PC3   | PC4   | PC5   | PC6   | PC7   | PC8   | PC9   | PC10  |
|-------------------------------|-------|-------|-------|-------|-------|-------|-------|-------|-------|-------|
| <b>Standard deviation</b>     | 2.957 | 1.828 | 1.681 | 1.289 | 1.013 | 0.827 | 0.689 | 0.533 | 0.488 | 0.420 |
| <b>Proportion of Variance</b> | 0.437 | 0.167 | 0.141 | 0.083 | 0.051 | 0.034 | 0.024 | 0.014 | 0.012 | 0.009 |
| <b>Cumulative Proportion</b>  | 0.437 | 0.604 | 0.746 | 0.829 | 0.880 | 0.914 | 0.938 | 0.952 | 0.964 | 0.973 |
|                               | PC11  | PC12  | PC13  | PC14  | PC15  | PC16  | PC17  | PC18  | PC19  | PC20  |
| <b>Standard deviation</b>     | 0.394 | 0.329 | 0.287 | 0.251 | 0.222 | 0.189 | 0.165 | 0.110 | 0.091 | 0.059 |
| <b>Proportion of Variance</b> | 0.008 | 0.005 | 0.004 | 0.003 | 0.002 | 0.002 | 0.001 | 0.001 | 0.000 | 0.000 |
| <b>Cumulative Proportion</b>  | 0.981 | 0.986 | 0.990 | 0.993 | 0.996 | 0.997 | 0.999 | 0.999 | 1.000 | 1.000 |

<sup>10</sup> For the R project for statistical computing, see: <https://www.r-project.org/>

<sup>11</sup> For Prism, see: <http://www.graphpad.com>

### **C. MATERIALS AND METHODS**

Reagents were obtained from Aldrich Chemical ([www.sigma-aldrich.com](http://www.sigma-aldrich.com)) or Acros Organics ([www.fishersci.com](http://www.fishersci.com)) and used without further purification. Lithium bis(trimethylsilyl)amide solution (1.0 M in THF) was obtained from Aldrich in SureSeal bottles. Optima grade solvents were obtained from Fisher Scientific ([www.fishersci.com](http://www.fishersci.com)), degassed with Ar, and purified on a solvent drying system as described<sup>12</sup> unless otherwise indicated. Reactions were performed in flame-dried glassware under positive Ar pressure with magnetic stirring. Rubber septa and syringes were used for the transfer of liquid reagents and solutions. Cold baths were generated as follows: 0 °C, ice/water; -78 °C, dry ice/acetone.

TLC was performed on 0.25 mm E. Merck silica gel 60 F254 plates and visualized under UV light (254 nm) or by staining with potassium permanganate (KMnO<sub>4</sub>) or cerium ammonium molybdenate (CAM). Flash chromatography was performed on E. Merck 230–400 mesh silica gel 60.

IR spectra were recorded on a Bruker Optics Tensor 27 FTIR spectrometer with the Pike technologies MIRacle ATR (attenuated total reflectance, ZnSe crystal) accessory and peaks reported in cm<sup>-1</sup>. NMR spectra were recorded on a Bruker UltraShield Plus 500 MHz Avance III NMR or UltraShield Plus 600 MHz Avance III NMR with DCH CryoProbe at 24 °C in CDCl<sub>3</sub> unless otherwise indicated. Spectra were processed using Mnova ([www.mestrelab.com/software/mnova-nmr](http://www.mestrelab.com/software/mnova-nmr)) software, and chemical shifts are expressed in ppm relative to TMS (<sup>1</sup>H, 0 ppm) or solvent signals: CDCl<sub>3</sub> (<sup>13</sup>C, 77.0 ppm), C<sub>6</sub>D<sub>6</sub> (<sup>1</sup>H, 7.16 ppm; <sup>13</sup>C, 128.0 ppm), methanol-*d*<sub>4</sub> (<sup>1</sup>H, 3.31 ppm; <sup>13</sup>C, 49.0 ppm), DMSO-*d*<sub>6</sub> (<sup>1</sup>H, 2.50 ppm; <sup>13</sup>C, 39.50 ppm), or acetone-*d*<sub>6</sub> (<sup>13</sup>C, 206.2 ppm); coupling constants are expressed in Hz. In the <sup>13</sup>C NMR data, reported signal multiplicities are related to C-F coupling unless noted otherwise. High resolution mass spectra were obtained at the MSKCC Analytical Core Facility on a Waters Acuity Premiere XE TOF LC-MS by electrospray ionization (ESI)

Compounds not cited in the paper are numbered herein from S7.

---

<sup>12</sup> Pangborn, A.B.; Giardello, M.A.; Grubbs, R.H.; Rosen, R.K.; Timmers, F. *Organometallics* **1996**, *15*, 1518–1520.

**D. SYNTHESIS OF OLEFIN-CONTAINING BENZANNULATED MEDIUM RING LACTAMS****1. SYNTHESIS OF LACTAMS 3A–3D**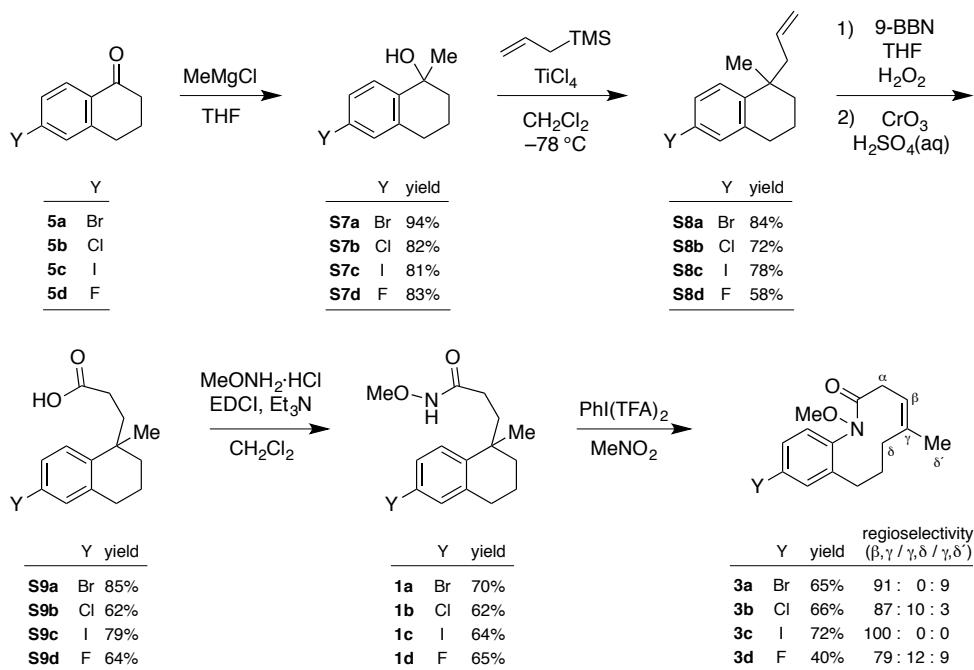**Supplementary Figure 11. Synthesis of 10-membered haloaromatics 3a–3d.****a. General procedure for nucleophilic addition of Grignard reagents to ketones 5a–5d**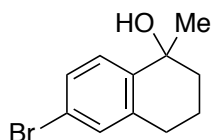

**6-Bromo-1-methyl-1,2,3,4-tetrahydronaphthalen-1-ol (S7a).** 6-bromo-1-tetralone **5a**<sup>13</sup> (296 mg, 1.31 mmol, 1.00 equiv) was dissolved in THF (15 mL) and cooled to 0 °C. A solution of MeMgCl (3.0 M in THF, 0.88 mL, 2.6 mmol, 2.0 equiv) was added by syringe and the reaction was stirred for 12 h or until complete conversion had occurred as judged by TLC. The reaction was then re-cooled to 0 °C and quenched with satd aq NH<sub>4</sub>Cl, and diluted with EtOAc. The aqueous layer was extracted with EtOAc (4 × 20 mL). The combined organic extracts were washed with brine, dried (Na<sub>2</sub>SO<sub>4</sub>), filtered, and concentrated by rotary evaporation to afford the crude product. Purification by silica flash chromatography (10% → 15% EtOAc in hexanes) yielded **S7a** as a colorless oil (298 mg, 94%). Compound **S7a** is known in the literature.<sup>14</sup>

<sup>13</sup> For preparation of 6-bromo-1-tetralone **5a**, see: Cui, L.-Q.; Dong, Z.-L.; Liu, K.; Zhang, C. *Org. Lett.*, **2011**, *13*, 6488–6491.

<sup>14</sup> Kumar, S., Sharma, R., Halder, S., Sawargave, S. P., Deore, V. B. PCT. Int. Appl. WO 2015125085 A1 Aug 27, 2015.



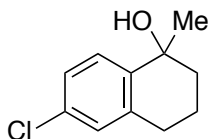

**6-Chloro-1-methyl-1,2,3,4-tetrahydronaphthalen-1-ol (S7b).**<sup>15</sup> Isolated as a colorless oil (311 mg, 82%). **TLC:**  $R_f$  0.12 (9:1 hexanes/EtOAc). **IR** (NaCl, film): 3357 (O–H st), 2938, 1594, 1481, 1185, 1103, 931, 882, 821. **<sup>1</sup>H-NMR** (600 MHz):  $\delta$  7.52 (d, 1H,  $J = 8.4$  Hz), 7.17 (dd, 1H,  $J = 8.4, 2.0$  Hz), 7.06 (dd, 1H,  $J = 2.2, 1.0$  Hz), 2.86 – 2.68 (m, 2H), 1.99 – 1.85 (m, 3H), 1.85 – 1.77 (m, 1H), 1.53 (s, 3H). **<sup>13</sup>C-NMR** (151 MHz):  $\delta$  141.3, 138.2, 132.6, 128.4, 127.9, 126.5, 70.3, 39.6, 30.8, 29.8, 20.3. **HRMS** (ESI)  $m/z$  calcd for  $C_{11}H_{12}Cl$  ( $[M-H_2O+H]^+$ ) 179.0628; found 179.0629.

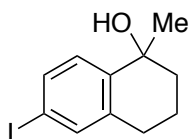

**6-Iodo-1-methyl-1,2,3,4-tetrahydronaphthalen-1-ol (S7c).**<sup>16</sup> Isolated as a colorless oil (697 mg, 81%). **TLC:**  $R_f$  0.21 (9:1 hexanes/EtOAc). **IR** (NaCl, film): 3362 (O–H st), 2935, 1583, 1477, 1400, 1103, 1048, 818. **<sup>1</sup>H-NMR** (600 MHz):  $\delta$  7.52 (d, 1H,  $J = 1.8$  Hz), 7.44 (d, 1H,  $J = 1.8$  Hz), 7.32 (d, 1H,  $J = 8.3$  Hz), 2.82 – 2.65 (m, 2H), 1.98 – 1.84 (m, 3H), 1.84 – 1.74 (m, 1H), 1.52 (s, 3H). **<sup>13</sup>C-NMR** (151 MHz):  $\delta$  142.6, 138.8, 137.5, 135.4, 128.4, 92.8, 70.5, 39.5, 30.7, 29.5, 20.2. **HRMS** (ESI)  $m/z$  calcd for  $C_{11}H_{12}I$  ( $[M-H_2O+H]^+$ ) 270.9984; found 270.9992.

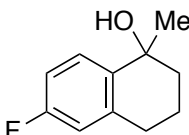

**6-Fluoro-1-methyl-1,2,3,4-tetrahydronaphthalen-1-ol (S7d).**<sup>17</sup> Isolated as a colorless oil (250 mg, 83%). Compound **S7d** is known in the literature.<sup>18</sup>

<sup>15</sup> For preparation of 6-chloro-1-tetralone **5b**, see: Cui, L.-Q.; Dong, Z.-L.; Liu, K.; Zhang, C. *Org. Lett.* **2011**, *13*, 6488–6491.

<sup>16</sup> For preparation of 6-iodo-1-tetralone **5c**, see: Murineddu, G.; Rulu, S.; Mussinu, J. M.; Loriga, G.; Grella, G. E.; Caral, M. A. M.; Lazzaril, P.; Pani, L.; Pinna, G. A. *Bioorg. Med. Chem.* **2005**, *13*, 3309–3320.

<sup>17</sup> For preparation of 6-fluoro-1-tetralone **5d**, see: Gavardinas, K.; Jadhav, P. K.; Wang, M. PCT Int. Appl. WO 2005/092854 A1, Feb 18, 2005.

<sup>18</sup> a) Gavardinas, K.; Jadhav, P. K.; Wang, M. PCT Int. Appl. WO 2005/092854 A1, Feb 18, 2005; b) Adcock, W.; Cox, D. P. *J. Org. Chem.* **1979**, *44*, 3004–3017.

## b. General procedure for Sakurai-type allylations of tetralols S7a–S7d

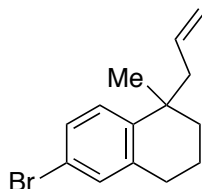

**1-Allyl-6-bromo-1-methyl-1,2,3,4-tetrahydronaphthalene (S8a).** Tertiary alcohol **S7a** (319 mg, 1.32 mmol, 1.00 equiv) and allyltrimethylsilane (1.1 mL, 6.9 mmol, 5.2 equiv) were dissolved in CH<sub>2</sub>Cl<sub>2</sub> (15 mL) and cooled to  $-78\text{ }^{\circ}\text{C}$ . A solution of TiCl<sub>4</sub> (1.0 M in toluene, 1.5 mL, 1.5 mmol, 1.1 equiv) was added by syringe and the reaction was stirred for 1 h. The reaction was quenched with satd aq NaHCO<sub>3</sub>, diluted with CH<sub>2</sub>Cl<sub>2</sub>, allowed to warm to 24  $^{\circ}\text{C}$  and stirred for 30 min. The aqueous layer was extracted with CH<sub>2</sub>Cl<sub>2</sub> (3  $\times$  20 mL). The combined organic extracts were dried (Na<sub>2</sub>SO<sub>4</sub>), filtered, and concentrated by rotary evaporation to afford the crude product. Purification by silica flash chromatography (100% hexanes) yielded **S8a** as a colorless oil (295 mg, 84%).

**TLC:**  $R_f$  0.22 (100% hexanes). **IR** (NaCl, film): 3073, 2933, 1588, 1480, 1095, 1049, 996, 912, 815. **<sup>1</sup>H-NMR** (600 MHz):  $\delta$  7.24 (dd, 1H,  $J = 8.4, 2.2$  Hz), 7.20 – 7.18 (m, 1H), 7.15 (d, 1H,  $J = 8.5$  Hz), 5.68 – 5.55 (m, 1H), 5.07 – 4.94 (m, 2H), 2.71 (t, 2H,  $J = 6.2$  Hz), 2.46 (dd, 1H,  $J = 14.0, 6.8$  Hz), 2.31 – 2.19 (m, 1H), 1.86 – 1.69 (m, 3H), 1.53 – 1.45 (m, 1H), 1.24 (s, 3H). **<sup>13</sup>C-NMR** (151 MHz):  $\delta$  143.5, 139.2, 135.0, 131.7, 128.8, 128.7, 118.9, 117.5, 47.6, 36.7, 35.0, 30.4, 29.8, 19.1. **HRMS** (ESI)  $m/z$  calcd for C<sub>14</sub>H<sub>19</sub>Br ([M+H]<sup>+</sup>) 265.0592; found 265.0599.

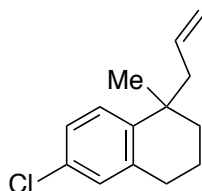

**1-Allyl-6-chloro-1-methyl-1,2,3,4-tetrahydronaphthalene (S8b).** Isolated as a colorless oil (249 mg, 72%). **TLC:**  $R_f$  0.48 (100% hexanes). **IR** (NaCl, film): 3074, 2934, 1482, 1103, 913, 838, 817. **<sup>1</sup>H-NMR** (600 MHz):  $\delta$  = 7.21 (d, 1H,  $J = 8.5$  Hz), 7.10 (dd, 1H,  $J = 8.4, 2.1$  Hz), 7.03 (dt, 1H,  $J = 2.1, 1.0$  Hz), 5.69 – 5.57 (m, 1H), 5.02 (d, 1H,  $J = 4.9$  Hz), 5.00 (t, 1H,  $J = 1.2$  Hz), 2.71 (t, 2H,  $J = 6.2$  Hz), 2.46 (dd, 1H,  $J = 13.9, 6.9$  Hz), 2.26 (dd, 1H,  $J = 13.9, 7.9$  Hz), 1.85 – 1.65 (m, 3H), 1.54 – 1.46 (m, 1H), 1.24 (s, 3H). **<sup>13</sup>C-NMR** (151 MHz):  $\delta$  143.0, 138.8, 135.1, 130.7, 128.7, 128.3, 125.9, 117.5, 47.6, 36.6, 35.1, 30.5, 29.8, 19.1. **HRMS** (ESI)  $m/z$  calcd for C<sub>14</sub>H<sub>19</sub>Cl ([M+H]<sup>+</sup>) 221.1097; found 221.1100.

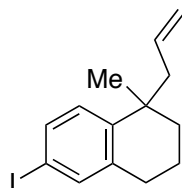

**1-Allyl-6-iodo-1-methyl-1,2,3,4-tetrahydronaphthalene (S8c).** Isolated as a colorless oil (585 mg, 78%). **TLC:**  $R_f$  0.52 (100% hexanes). **IR** (NaCl, film): 3072, 2932, 1581, 1478, 1049, 913, 816. **<sup>1</sup>H-NMR** (600 MHz):  $\delta$  7.44 (dd, 1H,  $J = 8.2, 1.8$  Hz), 7.42 – 7.36 (m, 1H), 7.02 (d, 1H,  $J = 8.4$  Hz), 5.69 – 5.55 (m, 1H), 5.02 (d, 1H,  $J = 4.2$  Hz), 5.00 (s, 1H), 2.69 (t, 2H,

$J = 6.3$  Hz), 2.45 (dd, 1H,  $J = 13.9, 6.9$  Hz), 2.25 (dd, 1H,  $J = 13.9, 7.8$  Hz), 1.83 – 1.67 (m, 3H), 1.53 – 1.44 (m, 1H), 1.23 (s, 3H).  $^{13}\text{C-NMR}$  (151 MHz):  $\delta$  144.3, 139.6, 137.8, 135.0, 134.7, 128.9, 117.5, 90.7, 47.5, 36.7, 35.0, 30.3, 29.8, 19.0. **HRMS** (ESI)  $m/z$  calcd for  $\text{C}_{14}\text{H}_{19}\text{I}$  ( $[\text{M}+\text{H}]^+$ ) 313.0453; found 313.0451.

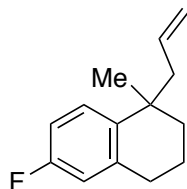

**1-Allyl-6-fluoro-1-methyl-1,2,3,4-tetrahydronaphthalene (S8d).** Isolated as a yellow oil (166 mg, 58%). **TLC:**  $R_f$  0.51 (100% hexanes). **IR** (NaCl, film): 3074, 2934, 1611, 1495, 1255, 1233, 914.  $^1\text{H-NMR}$  (600 MHz):  $\delta$  7.23 (dd, 1H,  $J = 8.7, 5.8$  Hz), 6.83 (td, 1H,  $J = 8.6, 2.8$  Hz), 6.73 (dd, 1H,  $J = 9.8, 2.3$  Hz), 5.71 – 5.57 (m, 1H), 5.02 (d, 1H,  $J = 5.6$  Hz), 5.00 (s, 1H), 2.72 (t, 2H,  $J = 6.2$  Hz), 2.46 (dd, 1H,  $J = 14.0, 6.8$  Hz), 2.26 (dd, 1H,  $J = 13.9, 7.8$  Hz), 1.87 – 1.69 (m, 3H), 1.54 – 1.47 (m, 1H), 1.24 (s, 3H).  $^{13}\text{C-NMR}$  (151 MHz):  $\delta$  160.4 (d,  $J = 243.6$  Hz), 140.1 (d,  $J = 3.0$  Hz), 139.0 (d,  $J = 6.9$  Hz), 135.2, 128.3 (d, H,  $J = 7.9$  Hz), 117.3, 114.9 (d,  $J = 19.8$  Hz), 112.8 (d,  $J = 20.9$  Hz), 47.8, 36.5, 35.2, 30.8 (d,  $J = 1.5$  Hz), 30.0, 19.1. **HRMS** (ESI)  $m/z$  calcd for  $\text{C}_{14}\text{H}_{19}\text{F}$  ( $[\text{M}+\text{H}]^+$ ) 205.1393; found 205.1399.

### c. General procedure for hydroboration–oxidations and Jones oxidations of allylated tetralones S8a–S8d

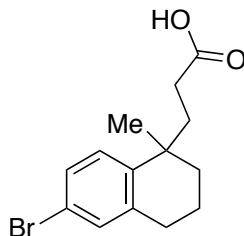

**3-(6-Bromo-1-methyl-1,2,3,4-tetrahydronaphthalen-1-yl)propanoic acid (S9a).** Allylated intermediate **S8a** (295 mg, 1.12 mmol, 1.00 equiv) was dissolved in THF (12 mL) and cooled to 0 °C. A solution of 9-BBN (0.5 M in THF, 4.4 mL, 2.2 mmol, 2.0 equiv) was added by syringe and the reaction was stirred at 0 °C to 24 °C for 12 h. The reaction was cooled to 0 °C and aq  $\text{H}_2\text{O}_2$  (30 wt%, 2.0 mL, 20 equiv), water (10 mL), aq NaOH (2.0 M, 2.0 mL), and EtOH (5 mL) were added sequentially. The reaction was warmed to 24 °C and stirred for 12 h. The volatile solvents were removed by rotary evaporation and EtOAc (10 mL) was added. The aqueous layer was extracted with EtOAc (4 × 20 mL). The combined organic extracts were washed with brine, dried ( $\text{Na}_2\text{SO}_4$ ), filtered, and concentrated by rotary evaporation to afford the crude product. Partial purification by silica flash chromatography (10% → 20% EtOAc in hexanes) afforded the intermediate (284 mg, 90%) containing about 15% 9-BBN byproducts that did not adversely affect the subsequent reaction. The intermediate alcohol (284 mg, 1.22 mmol, 1.00 equiv) was dissolved in acetone (12 mL) and cooled to 0 °C. A solution of Jones reagent, prepared by dissolving 670 mg  $\text{CrO}_3$  in 1.25 mL  $\text{H}_2\text{O}$  followed by dropwise addition of 0.58 mL conc.  $\text{H}_2\text{SO}_4$ ,<sup>19</sup> (0.60 mL) was added dropwise until an orange color persisted. The reaction was stirred at 0 °C for 1 h, then at 24 °C for 15 min. The reaction was quenched with isopropanol and Celite

<sup>19</sup> Eisenbraun, E.J. *Org. Synth.* **1965**, *45*, 28.

was added. The mixture was stirred for 5 min, filtered through Celite and concentrated by rotary evaporation. In the event that water remained in the flask, the residue was redissolved in EtOAc and H<sub>2</sub>O was added; the aqueous layer was extracted with EtOAc (3 × 10 mL). The combined organic extracts were washed with brine, dried (Na<sub>2</sub>SO<sub>4</sub>), filtered, and concentrated by rotary evaporation to afford the crude product. Purification by silica flash chromatography (20% EtOAc in hexanes + 1% AcOH) yielded carboxylic acid **S10a** as a colorless oil (241 mg, 85% over 2 steps).

**TLC:** *R<sub>f</sub>* 0.40 (7:3 hexanes/EtOAc + 1% AcOH). **IR** (NaCl, film): 2934, 1706 (C=O st), 1481, 1413, 1302, 1094, 818. **<sup>1</sup>H-NMR** (600 MHz): δ 7.25 (dd, 1H, *J* = 8.4, 2.2 Hz), 7.21 – 7.18 (m, 1H), 7.11 (d, 1H, *J* = 8.4 Hz), 2.74 – 2.67 (t, 2H, *J* = 6.3 Hz), 2.27 (ddd, 1H, *J* = 17.1, 11.9, 5.1 Hz), 2.16 – 2.04 (m, 2H), 1.86 (ddd, 1H, *J* = 13.8, 11.7, 5.2 Hz), 1.82 – 1.74 (m, 2H), 1.73 – 1.66 (m, 1H), 1.55 (ddd, 1H, *J* = 13.4, 7.1, 2.9 Hz), 1.25 (s, 3H). **<sup>13</sup>C-NMR** (151 MHz): δ 179.8, 142.3, 139.4, 131.9, 129.1, 128.4, 119.6, 37.3, 36.4, 34.8, 30.4, 30.4, 29.6, 19.2. **HRMS** (ESI) *m/z* calcd for C<sub>14</sub>H<sub>16</sub>BrO<sub>2</sub> ([M–H]<sup>−</sup>) 295.0334; found 295.0336.

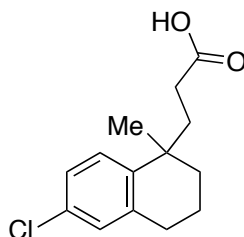

**3-(6-Chloro-1-methyl-1,2,3,4-tetrahydronaphthalen-1-yl)propanoic acid (S9b).** Isolated as a colorless oil (205 mg, 62% over 2 steps). **TLC:** *R<sub>f</sub>* 0.43 (7:3 hexanes/EtOAc + 1% AcOH). **IR** (NaCl, film): 2935, 1706 (C=O st), 1484, 1457, 1302, 1102, 818. **<sup>1</sup>H-NMR** (600 MHz): δ 7.17 (d, 1H, *J* = 8.4 Hz), 7.10 (dd, 1H, *J* = 8.4, 2.3 Hz), 7.04 (d, 1H, *J* = 2.4 Hz), 2.72 – 2.69 (m, 2H), 2.27 (ddd, 1H, *J* = 17.1, 11.8, 5.1 Hz), 2.17 – 2.03 (m, 2H), 1.87 (ddd, 1H, *J* = 13.9, 11.6, 5.1 Hz), 1.84 – 1.74 (m, 2H), 1.74 – 1.66 (m, 1H), 1.56 (ddd, 1H, *J* = 12.8, 7.0, 2.7 Hz), 1.26 (s, 3H). **<sup>13</sup>C-NMR** (151 MHz): δ 179.8, 141.7, 139.0, 131.1, 128.9, 128.0, 126.2, 37.3, 36.3, 34.9, 30.5, 30.4, 29.6, 19.2. **HRMS** (ESI) *m/z* calcd for C<sub>14</sub>H<sub>16</sub>ClO<sub>2</sub> ([M–H]<sup>−</sup>) 251.0839; found 251.0845.

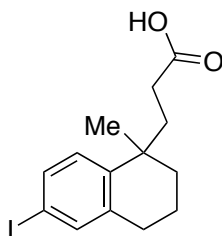

**3-(6-Iodo-1-methyl-1,2,3,4-tetrahydronaphthalen-1-yl)propanoic acid (S9c).** Isolated as a colorless oil (508 mg, 79% over 2 steps). **TLC:** *R<sub>f</sub>* 0.48 (7:3 hexanes/EtOAc + 1% AcOH). **IR** (NaCl, film): 2933, 1706 (C=O st), 1479, 1302, 815. **<sup>1</sup>H-NMR** (600 MHz): δ 7.45 (dd, 1H, *J* = 8.3, 1.9 Hz), 7.41 (d, 1H, *J* = 1.6 Hz), 6.98 (d, 1H, *J* = 8.3 Hz), 2.70 (t, 2H, *J* = 6.0 Hz), 2.27 (ddd, 1H, *J* = 17.1, 11.9, 5.1 Hz), 2.16 – 2.02 (m, 2H), 1.86 (ddd, 1H, *J* = 13.9, 11.7, 5.1 Hz), 1.82 – 1.73 (m, 2H), 1.73 – 1.65 (m, 1H), 1.55 (ddd, 2H, *J* = 13.2, 7.1, 2.7 Hz), 1.25 (s, 3H). **<sup>13</sup>C-NMR** (151 MHz): δ 179.0, 143.0, 139.7, 138.0, 135.0, 128.6, 91.0, 37.2, 36.5, 34.8, 30.4, 30.2, 29.4, 19.1. **HRMS** (ESI) *m/z* calcd for C<sub>14</sub>H<sub>16</sub>I O<sub>2</sub> ([M–H]<sup>−</sup>) 343.0195; found 343.0193.

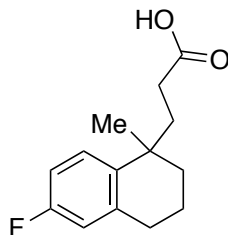

**3-(6-Fluoro-1-methyl-1,2,3,4-tetrahydronaphthalen-1-yl)propanoic acid (S9d).** Isolated as a colorless oil (123 mg, 64% over 2 steps). **TLC:**  $R_f$  0.48 (7:3 hexanes/EtOAc + 1% AcOH). **IR** (NaCl, film): 2935, 1707 (C=O st), 1496, 1418, 1242, 925.  **$^1\text{H-NMR}$**  (600 MHz):  $\delta$  7.19 (dd, 1H,  $J = 8.7, 5.8$  Hz), 6.83 (td, 1H,  $J = 8.5, 2.8$  Hz), 6.73 (dd, 1H,  $J = 9.7, 2.8$  Hz), 2.72 (t, 2H,  $J = 6.3$  Hz), 2.27 (ddd, 1H,  $J = 17.1, 11.9, 5.1$  Hz), 2.16 – 2.03 (m, 2H), 1.87 (ddd, 1H,  $J = 14.4, 12.0, 5.6$  Hz), 1.85 – 1.73 (m, 2H), 1.69 (td, 1H,  $J = 10.3, 3.7$  Hz), 1.56 (ddd, 1H,  $J = 13.2, 7.0, 2.9$  Hz), 1.26 (s, 3H).  **$^{13}\text{C-NMR}$**  (151 MHz):  $\delta$  180.0, 160.6 (d,  $J = 244.1$  Hz), 139.2 (d,  $J = 7.0$  Hz), 138.8 (d,  $J = 3.0$  Hz), 128.1 (d,  $J = 8.0$  Hz), 115.1 (d,  $J = 19.9$  Hz), 113.1 (d,  $J = 21.0$  Hz), 37.5, 36.2, 35.0, 30.7 (d,  $J = 1.5$  Hz), 30.56, 29.6, 19.2. **HRMS** (ESI)  $m/z$  calcd for  $\text{C}_{14}\text{H}_{16}\text{FO}_2$  ( $[\text{M-H}]^-$ ) 235.1134; found 235.1141.

#### d. General procedure for amidation of carboxylic acids S9a–S9d

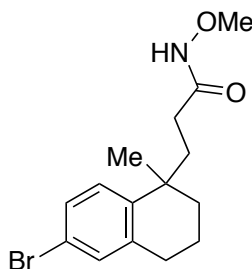

**3-(6-Bromo-1-methyl-1,2,3,4-tetrahydronaphthalen-1-yl)-N-methoxypropanamide (1a).** Carboxylic acid **S9a** (205 mg, 0.691 mmol, 1.00 equiv) was dissolved in  $\text{CH}_2\text{Cl}_2$  (7 mL) and methoxyamine hydrochloride (86.6 mg, 1.04 mmol, 1.50 equiv), *N*-(3-dimethylaminopropyl)-*N'*-ethylcarbodiimide hydrochloride (198 mg, 1.04 mmol, 1.50 equiv) and  $\text{Et}_3\text{N}$  (290 mL, 2.10 mmol, 3.00 equiv) were added sequentially. The reaction was stirred for at 24 °C for 5 h, then quenched with satd aq  $\text{NH}_4\text{Cl}$  and diluted with  $\text{CH}_2\text{Cl}_2$ . The aqueous layer was extracted with  $\text{CH}_2\text{Cl}_2$  (4  $\times$  20 mL). The combined organic extracts were dried ( $\text{Na}_2\text{SO}_4$ ), filtered, and concentrated by rotary evaporation to afford the crude product. Purification by silica flash chromatography (50% EtOAc in hexanes) yielded *N*-methoxyamide **1a** as a colorless oil (157 mg, 70%).

**TLC:**  $R_f$  0.20 (1:1 hexanes/EtOAc). **IR** (NaCl, film): 3173, 2934, 1656 (C=O st), 1481, 1093, 820.  **$^1\text{H-NMR}$**  (600 MHz):  $\delta$  7.97 (s, 1H), 7.26 – 7.23 (m, 1H), 7.21 – 7.18 (m, 1H), 7.14 – 7.08 (m, 1H), 3.81 – 3.56 (m, 3H), 2.80 – 2.59 (m, 2H), 2.16 – 2.05 (m, 1H), 1.98 (s, 1H), 1.93 – 1.84 (m, 1H), 1.84 – 1.64 (m, 4H), 1.60 – 1.50 (m, 1H), 1.26 (s, 3H).  **$^{13}\text{C-NMR}$**  (151 MHz):  $\delta$  171.1, 142.3, 139.8, 131.9, 129.1, 128.5, 119.2, 64.6, 37.8, 36.6, 34.9, 30.7, 30.4, 28.7, 19.2. **HRMS** (ESI)  $m/z$  calcd for  $\text{C}_{15}\text{H}_{21}\text{BrNO}_2$  ( $[\text{M+H}]^+$ ) 326.0756; found 326.0767.

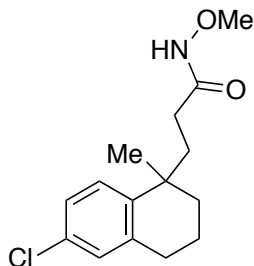

**3-(6-Chloro-1-methyl-1,2,3,4-tetrahydronaphthalen-1-yl)-N-methoxypropanamide (1b).**

Isolated as a colorless oil (171 mg, 62%). **TLC:**  $R_f$  0.24 (1:1 hexanes/EtOAc). **IR** (NaCl, film): 3173, 2935, 1654 (C=O st), 1438, 1459, 1102, 1075, 818.  **$^1\text{H-NMR}$**  (600 MHz):  $\delta$  8.05 (m, 1H), 7.17 (d, 1H,  $J = 8.6$  Hz), 7.11 (dd, 1H,  $J = 8.4, 2.3$  Hz), 7.04 (d, 1H,  $J = 2.2$  Hz), 3.82 – 3.56 (m, 3H), 2.81 – 2.59 (m, 2H), 2.09 (t, 1H,  $J = 13.9$  Hz), 1.98 (s, 1H), 1.90 (t, 1H,  $J = 13.5$  Hz), 1.86 – 1.66 (m, 4H), 1.60 – 1.50 (m, 1H), 1.26 (s, 3H).  **$^{13}\text{C-NMR}$**  (151 MHz):  $\delta$  171.1, 141.7, 139.0, 131.0, 128.9, 128.1, 126.2, 64.5, 37.8, 36.5, 35.0, 30.7, 30.5, 28.7, 19.2. **HRMS** (ESI)  $m/z$  calcd for  $\text{C}_{15}\text{H}_{21}\text{ClNO}_2$  ( $[\text{M}+\text{H}]^+$ ) 282.1261; found 282.1263.

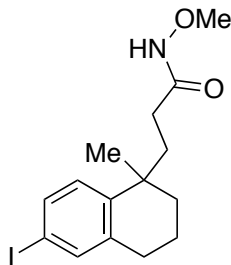

**3-(6-Iodo-1-methyl-1,2,3,4-tetrahydronaphthalen-1-yl)-N-methoxypropanamide (1c).**

Isolated as a colorless oil (353 mg, 64%). **TLC:**  $R_f$  0.09 (6:4 hexanes/EtOAc). **IR** (NaCl, film): 2933, 1706 (C=O st), 1479, 1302, 815.  **$^1\text{H-NMR}$**  (600 MHz):  $\delta$  7.98 (s, 1H), 7.45 (dd, 1H,  $J = 8.3, 2.0$  Hz), 7.43 – 7.38 (m, 1H), 6.98 (d, 1H,  $J = 7.6$  Hz), 3.81 – 3.56 (m, 3H), 2.77 – 2.59 (m, 2H), 2.09 (t, 1H,  $J = 12.9, 4.3$  Hz), 1.97 (s, 1H), 1.94 – 1.85 (m, 1H), 1.85 – 1.63 (m, 4H), 1.57 – 1.50 (m, 1H), 1.25 (s, 3H).  **$^{13}\text{C-NMR}$**  (151 MHz):  $\delta$  171.1, 143.0, 139.8, 137.9, 135.0, 128.7, 90.9, 64.6, 37.7, 36.7, 34.9, 30.6, 30.2, 28.7, 19.2. **HRMS** (ESI)  $m/z$  calcd for  $\text{C}_{15}\text{H}_{21}\text{INO}_2$  ( $[\text{M}+\text{H}]^+$ ) 374.0617; found 374.0613.

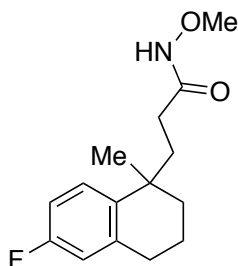

**3-(6-Fluoro-1-methyl-1,2,3,4-tetrahydronaphthalen-1-yl)-N-methoxypropanamide (1d).**

Isolated as a colorless oil (89.5 mg, 65%). **TLC:**  $R_f$  0.25 (1:1 hexanes/EtOAc). **IR** (NaCl, film): 3167, 2936, 1656 (C=O st), 1495, 1238, 1074.  **$^1\text{H-NMR}$**  (600 MHz):  $\delta$  7.96 (s, 1H), 7.24 – 7.14 (m, 1H), 6.84 (td, 1H,  $J = 8.5, 2.9$  Hz), 6.74 (dd, 1H,  $J = 9.6, 2.6$  Hz), 3.83 – 3.45 (m, 3H), 2.81 – 2.58 (m, 2H), 2.15 – 2.03 (m, 1H), 2.03 – 1.94 (m, 1H), 1.94 – 1.86 (m, 1H), 1.86 – 1.63 (m, 4H), 1.58 – 1.52 (m, 1H), 1.26 (s, 3H).  **$^{13}\text{C-NMR}$**  (151 MHz):  $\delta$  171.2, 160.5

(d,  $J = 244.1$  Hz), 139.2 (d,  $J = 7.0$  Hz), 138.8, 128.2 (d, H,  $J = 8.0$  Hz), 115.1 (d,  $J = 19.8$  Hz), 113.1 (d,  $J = 21.1$  Hz), 64.6, 38.0, 36.4, 35.1, 30.8, 30.7 (m,  $J = 1.5$  Hz), 28.8, 19.3. **HRMS** (ESI)  $m/z$  calcd for  $C_{15}H_{21}FNO_2$  ( $[M+H]^+$ ) 266.1556; found 266.1552.

**e. General procedure for the oxidative dearomatization–ring expansion reaction of *N*-methoxyamides 1a–1d**

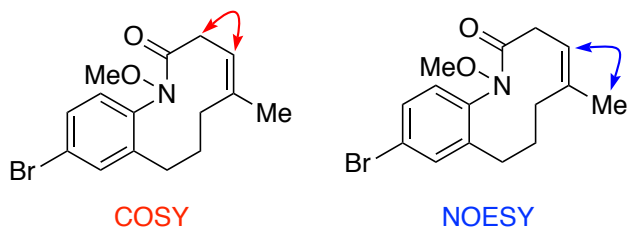

**(*Z*)-10-Bromo-1-methoxy-5-methyl-3,6,7,8-tetrahydrobenzo[*b*]azecin-2(1*H*)-one (3a).**

*N*-methoxyamide **1a** (11.6 mg, 35.6  $\mu$ mol, 1.00 equiv) was dissolved in nitromethane (0.5 mL) and cooled to 0 °C. [Bis(trifluoroacetoxy)iodo]benzene (PIFA) (2.8 mg, 71  $\mu$ mol, 2.0 equiv) was added as a solid and the reaction was stirred at 0 °C to 24 °C for 12 h. The reaction was quenched with satd aq  $NaHCO_3$  and diluted with  $CH_2Cl_2$ . The aqueous layer was extracted with  $CH_2Cl_2$  (4  $\times$  20 mL). The combined organic extracts were dried ( $Na_2SO_4$ ), filtered, and concentrated by rotary evaporation to afford the crude product. Purification by silica flash chromatography (30% EtOAc in hexanes) yielded 10-membered lactam **3a** as a colorless oil (7.5 mg, 65%).

**TLC:**  $R_f$  0.21 (7:3 hexanes/EtOAc). **IR** (NaCl, film): 2932, 1678 (C=O st), 1479, 1376, 1085, 1034, 984, 734.  **$^1H$ -NMR** (600 MHz):  $\delta$  7.59 (d, 1H,  $J = 2.2$  Hz), 7.45 (dd, 1H,  $J = 8.4, 2.2$  Hz), 7.21 (d, 1H,  $J = 8.4$  Hz), 5.59 (dd, 1H,  $J = 11.4, 5.5$  Hz), 3.69 (s, 3H), 2.87 – 2.75 (m, 2H), 2.67 – 2.52 (m, 2H), 2.02 – 1.81 (m, 2H), 1.73 (s, 3H).  **$^{13}C$ -NMR** (151 MHz):  $\delta$  168.1, 143.2, 137.9, 137.0, 132.3, 130.9, 130.5, 124.2, 119.6, 61.1, 34.1, 28.6, 26.1, 25.9, 23.2. **HRMS** (ESI)  $m/z$  calcd for  $C_{15}H_{19}BrNO_2$  ( $[M+H]^+$ ) 324.0599; found 324.0609.

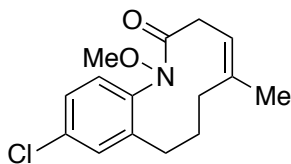

**(*Z*)-10-Chloro-1-methoxy-5-methyl-3,6,7,8-tetrahydrobenzo[*b*]azecin-2(1*H*)-one (3b).**

Isolated as a colorless oil (12.8 mg, 66%). **TLC:**  $R_f$  0.22 (7:3 hexanes/EtOAc). **IR** (NaCl, film): 2931, 1684 (C=O st), 1480, 1457, 1356, 1093, 1034, 812.  **$^1H$ -NMR** (600 MHz):  $\delta$  7.43 (d, 1H,  $J = 2.2$  Hz), 7.33 – 7.26 (m, 2H), 5.59 (dd, 1H,  $J = 11.4, 5.4$  Hz), 3.69 (s, 3H), 2.81 (t, 2H,  $J = 12.1$  Hz), 2.65 – 2.53 (m, 2H), 2.02 – 1.92 (m, 2H), 1.89 (t, 2H,  $J = 11.4$  Hz), 1.74 (s, 3H).  **$^{13}C$ -NMR** (151 MHz):  $\delta$  168.1, 142.9, 137.4, 137.0, 136.0, 130.3, 129.2, 127.9, 119.6, 61.6, 34.1, 28.6, 26.1, 26.0, 23.3. **HRMS** (ESI)  $m/z$  calcd for  $C_{15}H_{19}ClNO_2$  ( $[M+H]^+$ ) 280.1104; found 280.1108.

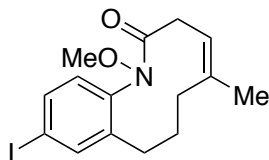

**(Z)-10-Iodo-1-methoxy-5-methyl-3,6,7,8-tetrahydrobenzo[b]azecin-2(1H)-one (3c).** Isolated as a colorless oil (24.3 mg, 72%). **TLC:**  $R_f$  0.23 (7:3 hexanes/EtOAc). **IR** (NaCl, film): 2929, 1680 (C=O st), 1477, 1354, 1034, 918.  **$^1\text{H-NMR}$**  (600 MHz):  $\delta$  7.79 (dd, 1H,  $J = 1.9, 0.9$  Hz), 7.65 (dd, 1H,  $J = 8.4, 2.0$  Hz), 7.06 (d, 1H,  $J = 8.3$  Hz), 5.58 (ddd, 1H,  $J = 11.2, 5.3, 1.6$  Hz), 3.68 (s, 3H), 2.81 (dd, 1H,  $J = 12.8, 11.3$  Hz), 2.79 – 2.72 (m, 1H), 2.64 – 2.50 (m, 2H), 2.01 – 1.83 (m, 4H), 1.73 (s, 3H).  **$^{13}\text{C-NMR}$**  (151 MHz):  $\delta$  168.1, 143.3, 138.7, 138.4, 137.0, 136.8, 130.6, 119.6, 96.3, 61.1, 34.1, 28.6, 26.1, 25.7, 23.2. **HRMS** (ESI)  $m/z$  calcd for  $\text{C}_{15}\text{H}_{19}\text{INO}_2$  ( $[\text{M}+\text{H}]^+$ ) 372.0461; found 372.0454.

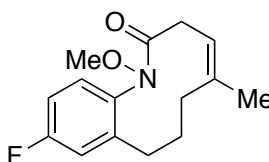

**(Z)-10-Fluoro-1-methoxy-5-methyl-3,6,7,8-tetrahydrobenzo[b]azecin-2(1H)-one (3d).** Isolated as a colorless oil (3.9 mg, 40%). **TLC:**  $R_f$  0.22 (7:3 hexanes/EtOAc). **IR** (NaCl, film): 2932, 1681 (C=O st), 1662, 1494, 1219, 1148, 1034, 815.  **$^1\text{H-NMR}$**  (600 MHz):  $\delta$  7.32 (dd, 1H,  $J = 8.8, 5.5$  Hz), 7.13 (dd, 1H,  $J = 9.6, 2.9$  Hz), 7.03 (td, 1H,  $J = 8.8, 2.9$  Hz), 5.59 (dd, 1H,  $J = 11.2, 5.5$  Hz), 3.70 (s, 2H), 2.81 (dd, 2H,  $J = 12.9, 11.3$  Hz), 2.67 – 2.51 (m, 2H), 2.00 – 1.89 (m, 2H), 1.91 – 1.79 (m, 2H), 1.73 (s, 3H).  **$^{13}\text{C-NMR}$**  (151 MHz):  $\delta$  168.3, 163.2 (d,  $J = 250.6$  Hz), 143.8 (d,  $J = 8.1$  Hz), 136.9, 134.9 (d,  $J = 3.0$  Hz), 131.0 (d,  $J = 9.1$  Hz), 119.7, 115.5 (d,  $J = 22.1$  Hz), 115.0 (d,  $J = 22.8$  Hz), 60.9, 34.1, 28.5, 26.2 (d,  $J = 1.9$  Hz), 26.2, 23.3. **HRMS** (ESI)  $m/z$  calcd for  $\text{C}_{15}\text{H}_{19}\text{FNO}_2$  ( $[\text{M}+\text{H}]^+$ ) 264.1400; found 264.1392.

---



## E. SYNTHESIS OF BICYCLIC KETONE PRECURSORS

Herein we report the preparation of non-commercially available bicyclic ketones, the syntheses of which have not been reported in the literature unless otherwise indicated.

### 1. SYNTHESIS OF KETONES S17 AND S18

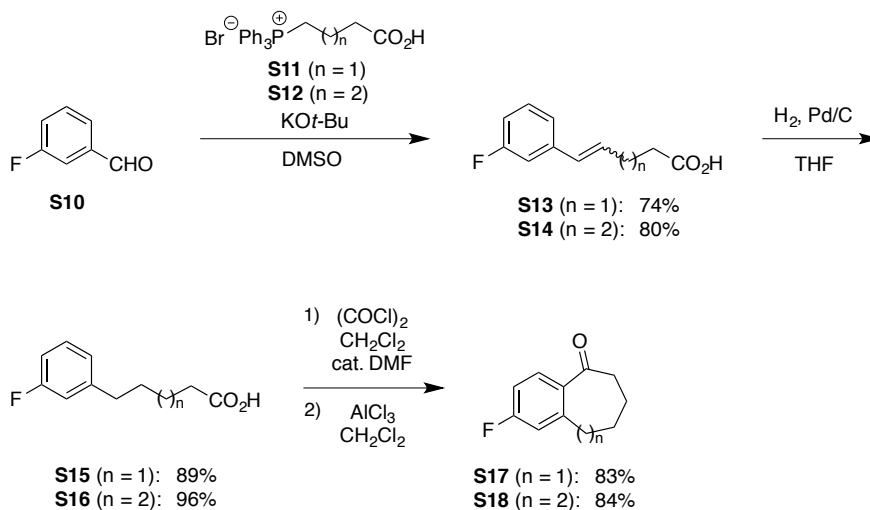

Supplementary Figure 12. Synthesis of fluorobenzosuberone and fluorobenzocyclooctanone.

#### a. General procedure for Wittig olefination of fluorobenzaldehyde S10

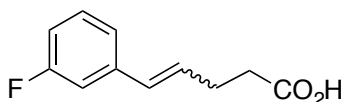

**(Z,E)-5-(3-Fluorophenyl)pent-4-enoic acid S13.**<sup>20</sup> To a suspension of (3-carboxypropyl)-triphenylphosphonium bromide **S11** (4.15 g, 9.67 mmol, 1.20 equiv) in anhydrous DMSO (10 mL) a solution of KO $t$ -Bu (1.00 M in THF, 21.4 mL, 21.4 mmol, 2.65 equiv) was added by syringe over 10 min and the resulting mixture was stirred for 20 min at 24 °C. A solution of 3-fluorobenzaldehyde **S10** (1.00 g, 8.06 mmol, 1.00 equiv) in DMSO (8 mL) was then added and the reaction was stirred for an additional 16 h at 24 °C. The reaction was poured into 100 mL of ice water and extracted with  $\text{CHCl}_3$  ( $3 \times 20$  mL). The aqueous layer was acidified with conc. HCl to a pH of 1 and extracted with  $\text{CHCl}_3$  ( $3 \times 20$  mL). The combined organic extracts were washed with brine, dried ( $\text{Na}_2\text{SO}_4$ ), filtered, and concentrated by rotary evaporation to afford the crude product. Purification by silica flash chromatography (0%  $\rightarrow$  20% EtOAc in hexanes + 1% AcOH) yielded unsaturated carboxylic acid **S13** as white solid (1.16 g, 74%, *E/Z* 96:4).

**TLC:**  $R_f$  0.43 (3:1 hexanes/EtOAc + 1% AcOH). **IR** (ATR, ZnSe): 2920, 1720 (C=O st), 1446, 1296, 1266, 1147, 973, 783, 770. **<sup>1</sup>H-NMR** (600 MHz):  $\delta$  7.27 – 7.23 (m, 1H), 7.09 (d,  $J = 7.8$  Hz, 1H), 7.04 (dt,  $J = 10.3, 1.9$  Hz, 1H), 6.90 (td,  $J = 8.5, 2.7$  Hz, 1H), 6.42 (d,  $J = 15.8$  Hz, 1H), 6.26 – 6.20 (m, 1H), 2.57 – 2.54 (m, 4H). **<sup>13</sup>C-NMR** (151 MHz):  $\delta$  178.9, 163.1 (d,  $J = 245.0$  Hz), 139.6 (d,  $J = 7.7$  Hz), 130.2 (d,  $J = 2.5$  Hz), 129.9 (d,  $J = 8.4$  Hz), 129.4,

<sup>20</sup> Procedure was adapted from: Murineddu, G.; Ruiu, S.; Loriga, G.; Manca, I.; Lazzari, P.; Reali, R.; Pani, L.; Toma, L.; Pinna, G. *A. J. Med. Chem.* **2005**, *48*, 7351–7362.

122.0 (d,  $J = 2.7$  Hz), 114.0 (d,  $J = 21.4$  Hz), 112.5 (d,  $J = 21.7$  Hz), 33.5, 27.8. **HRMS** (ESI)  $m/z$  calcd for  $C_{11}H_{10}FO_2$  ( $[M-H]^-$ ) 193.0665; found 193.0665.

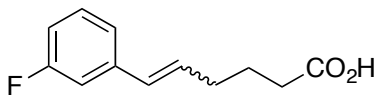

**(Z,E)-6-(3-Fluorophenyl)hex-5-enoic acid (S14).** Isolated as a white solid (1.35 g, 80%, *E/Z* 97:3). **TLC:**  $R_f$  0.43 (3:1 hexanes/EtOAc + 1% AcOH). **IR** (ATR, ZnSe): 2935, 1707 (C=O st), 1489, 1269, 1143, 1143, 965, 777, 737.  **$^1H$ -NMR** (600 MHz):  $\delta$  7.28 – 7.21 (m, 1H), 7.09 (d, 1H,  $J = 7.7$  Hz), 7.04 (d, 1H,  $J = 10.2$  Hz), 6.89 (td, 1H,  $J = 8.4, 2.1$  Hz), 6.38 (d, 1H,  $J = 15.8$  Hz), 6.19 (dt, 1H,  $J = 15.7, 7.0$  Hz), 2.41 (t, 2H,  $J = 7.4$  Hz), 2.28 (q, 2H,  $J = 7.2$  Hz), 1.83 (p, 2H,  $J = 7.4$  Hz).  **$^{13}C$ -NMR** (151 MHz):  $\delta$  179.3, 163.1 (d,  $J = 244.9$  Hz), 139.8 (d,  $J = 7.7$  Hz), 130.8, 129.9, 129.9 (d,  $J = 11.0$  Hz), 121.9 (d,  $J = 2.7$  Hz), 113.8 (d,  $J = 21.4$  Hz), 112.4 (d,  $J = 21.7$  Hz), 33.2, 32.1, 24.0. **HRMS** (ESI)  $m/z$  calcd for  $C_{12}H_{12}FO_2$  ( $[M-H]^-$ ) 207.0821; found 207.0819.

#### b. General procedure for catalytic hydrogenation of olefins S13 and S14

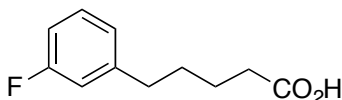

**5-(3-Fluorophenyl)pentanoic acid (S15).**<sup>20</sup> Olefinic carboxylic acid **S13** (1.00 g, 5.15 mmol, 1.00 equiv) was dissolved in EtOAc (13 mL). 5% Palladium on carbon (0.55 g) was added and the reaction was stirred for 16 h under ambient hydrogen pressure at 24 °C. The mixture was then filtered through a pad of Celite. The filtrate was concentrated by rotary evaporation to afford the crude product. Purification by silica flash chromatography (0% → 20% EtOAc in hexanes + 1% AcOH) yielded carboxylic acid **S15** as a white solid (0.90 g, 89%).

**TLC:**  $R_f$  0.45 (3:1 hexanes/EtOAc + 1% AcOH). **IR** (ATR, ZnSe): 2947, 1695 (C=O st), 1487, 1408, 1260, 1201, 1147, 927.  **$^1H$ -NMR** (600 MHz, Chloroform-*d*):  $\delta$  7.25 – 7.21 (m, 1H), 6.94 (d, 1H,  $J = 7.6$  Hz), 6.90 – 6.85 (m, 2H), 2.63 (t, 2H,  $J = 6.8$  Hz), 2.39 (t, 2H,  $J = 6.7$  Hz), 1.68 (p, 4H,  $J = 3.7$  Hz).  **$^{13}C$ -NMR** (151 MHz):  $\delta$  179.3, 162.9 (d,  $J = 245.2$  Hz), 144.5 (d,  $J = 7.1$  Hz), 129.7 (d,  $J = 8.4$  Hz), 124.0 (d,  $J = 2.8$  Hz), 115.1 (d,  $J = 20.7$  Hz), 112.7 (d,  $J = 21.0$  Hz), 35.3, 33.7, 30.4, 24.1. **HRMS** (ESI)  $m/z$  calcd for  $C_{11}H_{12}FO_2$  ( $[M-H]^-$ ) 195.0821; found 195.0824.

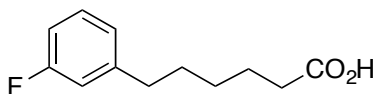

**6-(3-Fluorophenyl)hexanoic acid (S16).** Isolated as a white solid (1.26 g, 96%). **TLC:**  $R_f$  0.48 (3:1 hexanes/EtOAc + 1% AcOH). **IR** (ATR, ZnSe): 2936, 1708 (C=O st), 1590, 1449, 1253, 1141, 941, 782.  **$^1H$ -NMR** (600 MHz):  $\delta$  7.25 – 7.20 (m, 1H), 6.94 (d, 1H,  $J = 7.6$  Hz), 6.90 – 6.84 (m, 2H), 2.61 (d, 2H,  $J = 7.6$  Hz), 2.36 (t, 2H,  $J = 7.5$  Hz), 1.71 – 1.60 (m, 4H), 1.42 – 1.35 (m, 2H).  **$^{13}C$ -NMR** (151 MHz):  $\delta$  179.8, 162.9 (d,  $J = 245.1$  Hz), 145.0 (d,  $J = 7.1$  Hz), 129.6 (d,  $J = 8.3$  Hz), 124.0 (d,  $J = 2.6$  Hz), 115.1 (d,  $J = 20.7$  Hz), 112.5 (d,  $J = 21.0$  Hz), 35.4, 33.9, 30.8, 28.5, 24.4. **HRMS** (ESI)  $m/z$  calcd for  $C_{12}H_{15}FO_2Na$  ( $[M+Na]^+$ ) 233.0954; found 233.0955.

### c. General procedure for intramolecular Friedel–Crafts annulation of carboxylic acids **S15** and **S16**

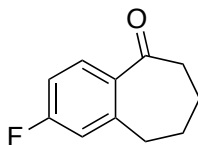

**2-Fluoro-6,7,8,9-tetrahydro-5H-benzo[7]annulen-5-one (S17).**<sup>21</sup> Carboxylic acid **S15** (0.80 g, 4.1 mmol, 1.0 equiv) and oxalyl chloride (0.57 g, 4.5 mmol, 1.1 equiv) were dissolved in CH<sub>2</sub>Cl<sub>2</sub> (8.2 mL) and cooled to 0 °C. DMF (0.1 mL) was then added and the reaction was stirred for 2 h at 24 °C. The reaction mixture was then directly added to a suspension of AlCl<sub>3</sub> (2.72 g, 20.4 mmol, 5.00 equiv) in CH<sub>2</sub>Cl<sub>2</sub> (20 mL) and stirred for 4 h at 24 °C. The reaction was poured into 20 mL of ice water and extracted with CH<sub>2</sub>Cl<sub>2</sub> (4 × 20 mL). The combined organic extracts were washed with 1 M solution of NaOH, brine, dried (Na<sub>2</sub>SO<sub>4</sub>), filtered, and concentrated by rotary evaporation to afford the crude product. Purification by silica flash chromatography (0% → 10% EtOAc in hexanes) yielded ketone **S17** as a yellow oil (0.60 g, 83%).

**TLC:** R<sub>f</sub> 0.59 (3:1 hexanes/EtOAc). **IR** (ATR, ZnSe): 2943, 1677 (C=O st), 1606, 1584, 1264, 1091, 983, 870, 827. **<sup>1</sup>H-NMR** (600 MHz): δ 7.77 (dd, 1H, *J* = 8.6, 6.1 Hz), 6.98 (td, 1H, *J* = 8.4, 2.5 Hz), 6.91 (dd, 1H, *J* = 9.3, 2.5 Hz), 2.95 – 2.90 (m, 2H), 2.76 – 2.71 (m, 2H), 1.92 – 1.86 (m, 2H), 1.84 – 1.79 (m, 2H). **<sup>13</sup>C-NMR** (151 MHz): δ 204.4, 164.9 (d, *J* = 253.2 Hz), 144.5 (d, *J* = 8.4 Hz), 135.0 (d, *J* = 2.9 Hz), 131.5 (d, *J* = 9.4 Hz), 116.4 (d, *J* = 21.4 Hz), 113.7 (d, *J* = 21.4 Hz), 40.7, 32.5, 24.9, 20.6. **HRMS** (ESI) *m/z* calcd for C<sub>11</sub>H<sub>11</sub>FO ([M+Na]<sup>+</sup>) 201.0692; found 201.0692.

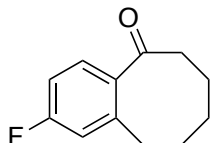

**2-Fluoro-7,8,9,10-tetrahydrobenzo[8]annulen-5(6H)-one (S18).** Isolated as a colorless oil (0.73 g, 84%). **TLC:** R<sub>f</sub> 0.80 (3:1 hexanes/EtOAc). **IR** (ATR, ZnSe): 2933, 1667 (C=O st), 1603, 1582, 1253, 1233, 1104, 958, 735. **<sup>1</sup>H-NMR** (600 MHz): δ 7.82 (dd, 1H, *J* = 8.7, 6.2 Hz), 6.97 (td, 1H, *J* = 8.4, 2.5 Hz), 6.89 (dd, 1H, *J* = 9.6, 2.5 Hz), 3.09 (d, 2H, *J* = 6.5 Hz), 2.96 (t, 2H, *J* = 7.0 Hz), 1.90 – 1.78 (m, 4H), 1.54 – 1.47 (m, 2H). **<sup>13</sup>C-NMR** (151 MHz): δ 204.6, 164.7 (d, *J* = 252.5 Hz), 143.5 (d, *J* = 8.1 Hz), 135.8 (d, *J* = 3.0 Hz), 131.1 (d, *J* = 9.2 Hz), 117.7 (d, *J* = 21.1 Hz), 113.5 (d, *J* = 21.1 Hz), 43.5, 34.7, 27.5, 24.1 (2C). **HRMS** (ESI) *m/z* calcd for C<sub>12</sub>H<sub>14</sub>FO ([M+H]<sup>+</sup>) 193.1029; found 193.1036.

<sup>21</sup> Procedure was adapted from: Zhang, Y.; Burgess, J. P.; Brackeen, M.; Gilliam, A.; Mascarella, S. W.; Page, K.; Seltzman, H. H.; Thomas, B. F. *J. Med. Chem.* **2008**, *51*, 3526–3539.

## 2. SYNTHESIS OF KETONE S21

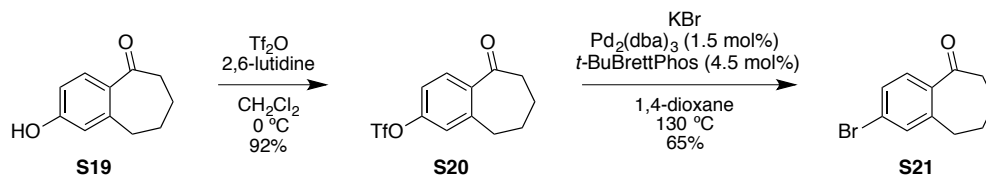

Supplementary Figure 13. Synthesis of bromobenzosuberone S21.

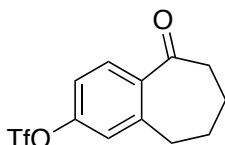**5-Oxo-6,7,8,9-tetrahydro-5H-benzo[7]annulen-2-yl trifluoromethanesulfonate (S20).**

7-Hydroxy-1-benzosuberone **S19**<sup>1</sup> (1.25 g, 7.09 mmol, 1.00 equiv) was dissolved in CH<sub>2</sub>Cl<sub>2</sub> (8 mL) and cooled to 0 °C. 2,6-Lutidine (0.860 mL, 7.45 mmol, 1.05 equiv) and a solution of trifluoromethanesulfonic anhydride (1.25 mL, 7.45 mmol, 1.05 equiv) in CH<sub>2</sub>Cl<sub>2</sub> (8 mL) were then added sequentially and the reaction was stirred for 2 h at 0 °C. The reaction was warmed to 24 °C and diluted with CH<sub>2</sub>Cl<sub>2</sub>, and washed with 1 M HCl (2 × 10 mL). The combined organic extracts were then washed with brine, dried (Na<sub>2</sub>SO<sub>4</sub>), filtered, and concentrated by rotary evaporation to afford the crude product. Purification by silica flash chromatography (0% → 10% EtOAc in hexanes) yielded triflate **S20** as an orange solid (2.0 g, 92%).

**TLC:** R<sub>f</sub> 0.65 (3:1 hexanes/EtOAc). **IR** (ATR, ZnSe): 2944, 2870, 1683 (C=O st), 1603, 1426, 1211, 974, 844. **<sup>1</sup>H-NMR** (600 MHz): δ 7.81 (d, *J* = 8.6 Hz, 1H), 7.21 (dd, *J* = 8.6, 2.4 Hz, 1H), 7.14 (d, *J* = 2.3 Hz, 1H), 2.97 (t, *J* = 6.1 Hz, 2H), 2.76 (t, *J* = 6.2 Hz, 2H), 1.93 (p, *J* = 6.7 Hz, 2H), 1.85 (p, *J* = 6.7 Hz, 2H). **<sup>13</sup>C-NMR** (151 MHz): δ 204.1, 151.4, 144.2, 138.7, 131.1, 122.3, 119.4, 118.7 (q, *J* = 320.8 Hz), 40.6, 32.5, 24.9, 20.7. **HRMS** (ESI) *m/z* calcd for C<sub>12</sub>H<sub>11</sub>F<sub>3</sub>O<sub>4</sub>Na ([M+Na]<sup>+</sup>) 331.0228; found 331.0223.

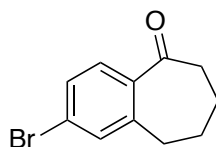

**2-Bromo-6,7,8,9-tetrahydro-5H-benzo[7]annulen-5-one (S21).**<sup>22</sup> To a 25-mL round-bottom flask was added potassium bromide (0.83 g, 7.0 mmol, 2.0 equiv), potassium fluoride (105 mg, 1.75 mmol, 0.500 equiv) and aryl triflate **S20** (1.1 g, 3.5 mmol, 1.0 equiv), which was evacuated and backfilled with argon three times. To a vial was added Pd<sub>2</sub>(dba)<sub>3</sub> (48.0 mg, 52.5 μmol, 1.50 mol%) and *t*-BuBrettPhos (76.3 mg, 158 μmol, 4.50 mol%), which was evacuated and backfilled with argon three times. 1,4-Dioxane (3.5 mL) was added to the vial and the mixture was heated at 120 °C in a preheated oil bath for 3 minutes. The catalyst solution was then cooled to 24 °C, then it was added to the reaction mixture containing potassium bromide, potassium fluoride and aryl triflate **S20** followed by addition of 1,4-dioxane (10.5 mL). The resulting mixture was stirred at 130 °C in a preheated oil bath for 16 h. The reaction mixture was then cooled to 24 °C, filtered through a pad of Celite, and concentrated by rotary evaporation to afford

<sup>22</sup> Procedure was adapted from: Pan, J.; Wang, X. Y.; Zhang, Y.; Buchwald, S. L. *Org. Lett.* **2011**, *13*, 4974–4976.

the crude product. Purification by silica flash chromatography (0% → 20% EtOAc in hexanes) yielded ketone **S21** as an orange solid (0.54 g, 65%).

**TLC:**  $R_f$  0.81 (3:1 hexanes/EtOAc). **IR** (ATR, ZnSe): 2941, 1676 (C=O st), 1585, 1261, 1105, 963, 824. **<sup>1</sup>H-NMR** (600 MHz):  $\delta$  7.60 (d, 1H,  $J = 8.3$  Hz), 7.44 (dd, 1H,  $J = 8.3, 1.8$  Hz), 7.38 (d, 1H,  $J = 1.6$  Hz), 2.90 (t, 2H,  $J = 6.5$  Hz), 2.72 (d, 2H,  $J = 6.0$  Hz), 1.89 (p, 2H,  $J = 6.7$  Hz), 1.81 (p, 2H,  $J = 7.3, 6.6$  Hz). **<sup>13</sup>C-NMR** (151 MHz):  $\delta$  205.0, 143.2, 137.5, 132.5, 130.3, 129.9, 126.8, 40.7, 32.2, 25.0, 20.6. **HRMS** (ESI)  $m/z$  calcd for  $C_{11}H_{12}BrO$  ( $[M+H]^+$ ) 239.0072; found 239.0072.

### 3. SYNTHESIS OF KETONE S23

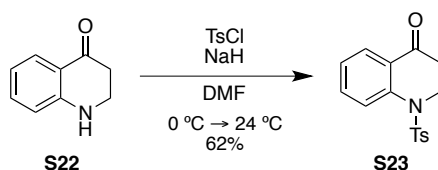

Supplementary Figure 14. Synthesis of 1-tosyl-2,3-dihydroquinolin-4(1H)-one **S23**.

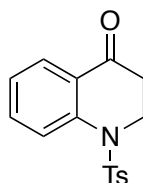

**1-Tosyl-2,3-dihydroquinolin-4(1H)-one (S23).** 2,3-Dihydroquinolin-4(1H)-one **S22** (0.10 g, 0.68 mmol, 1.0 equiv) was dissolved in DMF (6.8 mL) and cooled to 0 °C. NaH (27 mg, 60 % dispersion in mineral oil, 0.68 mmol, 1.0 equiv) was added and the reaction was stirred for 1 h at 0 °C. *p*-Toluenesulfonyl chloride (0.13 g, 0.68 mmol, 1.0 equiv) was then added and the reaction was stirred for an additional 6 h at 24 °C. The reaction was quenched slowly with satd aq  $NH_4Cl$  at 0 °C, warmed to 24 °C and diluted with EtOAc. The mixture was extracted with EtOAc (3 × 20 mL). The combined organic extracts were washed with brine, dried ( $Na_2SO_4$ ), filtered, and concentrated by rotary evaporation to afford the crude product. Purification by silica flash chromatography (0% → 10% MeOH in  $CH_2Cl_2$ ) yielded ketone **S23** as a yellow solid (127 mg, 62%).

**TLC:**  $R_f$  0.48 (3:1 hexanes/EtOAc). **IR** (ATR, ZnSe): 2941, 1687 (C=O st), 1598, 1475, 1458, 1353, 911, 736. **<sup>1</sup>H-NMR** (600 MHz):  $\delta$  7.95 (dd, 1H,  $J = 7.8, 1.7$  Hz), 7.87 (d, 1H,  $J = 8.3$  Hz), 7.58 (td, 1H,  $J = 8.6, 8.1, 1.7$  Hz), 7.55 (d, 2H,  $J = 8.3$  Hz), 7.28 (d, 1H,  $J = 8.0$  Hz), 7.23 (d, 2H,  $J = 8.2$  Hz), 4.24 (t, 2H,  $J = 6.2$  Hz), 2.40 – 2.37 (m, 5H). **<sup>13</sup>C-NMR** (151 MHz):  $\delta$  192.7, 144.6, 142.3, 136.8, 134.7, 130.1, 127.7, 126.8, 125.7, 125.6, 124.6, 46.2, 36.5, 21.6. **HRMS** (ESI)  $m/z$  calcd for  $C_{16}H_{16}NO_3S$  ( $[M+H]^+$ ) 302.0851; found 302.0853.

## 4. SYNTHESIS OF KETONES S26 AND S27

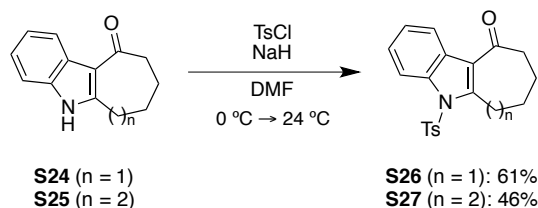

Supplementary Figure 15. Synthesis of tetrahydrocycloindolones S26 and S27.

a. General procedure for *N*-tosylation of tetrahydrocycloindolones S24 and S25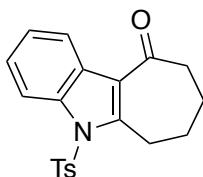

**5-Tosyl-6,7,8,9-tetrahydrocyclohepta[b]indol-10(5*H*)-one (S26).** 6,7,8,9-Tetrahydrocyclohepta[b]indol-10(5*H*)-one **S24**<sup>23</sup> (0.976 g, 4.91 mmol, 1.00 equiv) was dissolved in DMF (20 mL) and cooled to 0 °C. NaH (0.14 g, 60% dispersion in mineral oil, 5.9 mmol, 1.2 equiv) was added and the reaction was stirred at 0 °C for 30 min. *p*-Toluenesulfonyl chloride (1.40 g, 7.36 mmol, 1.50 equiv) was then added and the reaction was stirred at 0 °C to 24 °C over 12 h. The reaction was re-cooled to 0 °C, and quenched with satd aq NaHCO<sub>3</sub> and diluted with Et<sub>2</sub>O. The organic layer was extracted with Et<sub>2</sub>O (4 × 20 mL). The combined organic extracts were washed with brine, dried (Na<sub>2</sub>SO<sub>4</sub>), filtered, and concentrated by rotary evaporation to afford the crude product. Purification by silica flash chromatography (10% → 20% EtOAc in hexanes) yielded ketone **S26** as a light yellow solid (1.06 g, 61%).

**TLC:** *R<sub>f</sub>* 0.28 (4:1 hexanes/EtOAc). **IR** (NaCl, film): 2941, 1655 (C=O st), 1450, 1378, 1173, 1089, 967, 751, 664 **<sup>1</sup>H-NMR** (600 MHz): δ 8.25 (d, 2H, *J* = 7.8 Hz), 7.69 (d, 2H, *J* = 8.4 Hz), 7.39 – 7.30 (m, 2H), 7.28 – 7.23 (m, 2H), 3.44 (dd, 2H, *J* = 6.8, 5.0 Hz), 2.76 (dd, 2H, *J* = 7.1, 5.3 Hz), 2.38 (s, 3H), 1.95 – 1.82 (m, 4H). **<sup>13</sup>C-NMR** (151 MHz): δ 199.3, 148.2, 145.6, 136.3, 136.0, 130.1, 127.3, 126.4, 125.3, 124.8, 121.7, 121.7, 114.4, 42.8, 26.1, 24.9, 21.7, 21.2. **HRMS** (ESI) *m/z* calcd for C<sub>20</sub>H<sub>20</sub>NO<sub>3</sub>S ([M+H]<sup>+</sup>) 354.1164; found 354.1147.

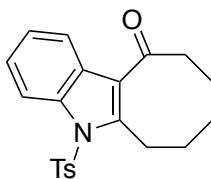

**5-Tosyl-5,6,7,8,9,10-hexahydro-11*H*-cycloocta[b]indol-11-one (S27).**<sup>24</sup> Isolated as a light yellow oil (681 mg, 46%). **TLC:** *R<sub>f</sub>* 0.29 (4:1 hexanes/EtOAc). **IR** (NaCl, film): 2933, 1647 (C=O st), 1476, 1392, 1374, 1177, 1048, 751. **<sup>1</sup>H-NMR** (500 MHz): δ 8.33 – 8.23 (m, 2H), 7.70

<sup>23</sup> For preparation of 6,7,8,9-tetrahydrocyclohepta[b]indol-10(5*H*)-one **S24**, see: Oikawa, Y.; Yonemitsu, O. *J. Org. Chem.* **1977**, *42*, 1213–1216.

<sup>24</sup> For preparation of 7,8,9,10-tetrahydro-5*H*-cycloocta[b]indol-11(6*H*)-one **S25**, see: Talez, O.; Saracoglu, N. *Tetrahedron*, **2010**, *66*, 1902–1910.

(d, 2H,  $J = 8.4$  Hz), 7.37 – 7.29 (m, 2H), 7.26 – 7.23 (m, 2H), 3.55 (t, 2H,  $J = 6.6$  Hz), 2.89 (t, 2H,  $J = 7.1$  Hz), 2.38 (s, 3H), 1.87 – 1.73 (m, 4H), 1.55 – 1.47 (m, 2H).  $^{13}\text{C-NMR}$  (126 MHz):  $\delta$  199.6, 145.5, 144.6, 136.4, 136.2, 130.2, 127.6, 126.4, 125.2, 124.7, 122.3, 121.9, 114.3, 43.1, 26.3, 24.5, 24.0, 23.2, 21.6. **HRMS** (ESI)  $m/z$  calcd for  $\text{C}_{21}\text{H}_{22}\text{NO}_3\text{S}$  ( $[\text{M}+\text{H}]^+$ ) 368.1320; found 368.1314.

---

## F. SYNTHESIS OF KETONE-CONTAINING BENZANNULATED MEDIUM-RING LACTAMS

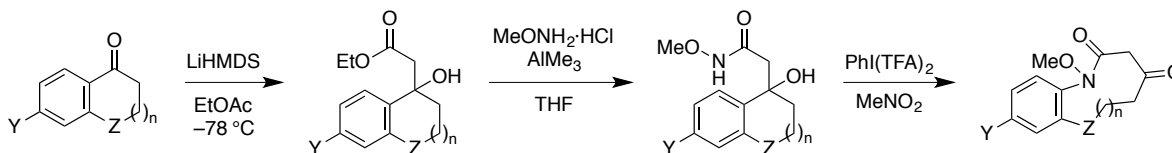

Supplementary Figure 16. Three-step synthesis of medium-ring lactams from bicyclic ketones.

### 1. SYNTHESIS OF $\beta$ -HYDROXYESTERS

#### a. General procedure for preparation of $\beta$ -hydroxyesters

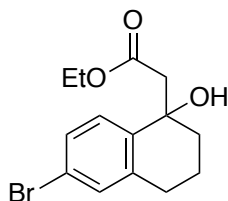

**Ethyl 2-(6-bromo-1-hydroxy-1,2,3,4-tetrahydronaphthalen-1-yl)acetate (6a).** Ethyl acetate (0.65 mL, 6.7 mmol, 3.0 equiv) was dissolved in THF (13 mL) and cooled to  $-78\text{ }^{\circ}\text{C}$ . A solution of LiHMDS (1.0 M in THF, 6.7 mL, 6.7 mmol, 3.0 equiv) was added by syringe over 5 min and the reaction was stirred for 1 h. A solution of 6-bromo-1-tetralone **5a**<sup>13</sup> (1.0 M in THF, 0.50 g, 2.2 mmol, 1.0 equiv) was then added by syringe over 5 min and the reaction was stirred for additional 4 h at  $-78\text{ }^{\circ}\text{C}$  until complete conversion. The reaction was quenched slowly with satd aq  $\text{NH}_4\text{Cl}$  at  $-78\text{ }^{\circ}\text{C}$ , warmed to  $24\text{ }^{\circ}\text{C}$  and diluted with EtOAc. The mixture was extracted with EtOAc ( $3 \times 20\text{ mL}$ ). The combined organic extracts were washed with brine, dried ( $\text{Na}_2\text{SO}_4$ ), filtered, and concentrated by rotary evaporation to afford the crude product. Purification by silica flash chromatography (0%  $\rightarrow$  10% EtOAc in hexanes) yielded  $\beta$ -hydroxyester **6a** as a colorless oil (650 mg, 93%).

**TLC:**  $R_f$  0.42 (3:1 hexanes/EtOAc). **IR** (ATR, ZnSe): 3482 (O–H st), 2938, 1712 (C=O st), 1591, 1480, 1328, 1199, 1184, 1084, 1025, 823, 735.  **$^1\text{H-NMR}$**  (600 MHz):  $\delta$  7.44 (d, 1H,  $J = 8.4\text{ Hz}$ ), 7.32 (dd, 1H,  $J = 8.5, 2.0\text{ Hz}$ ), 7.24 – 7.22 (m, 1H), 4.19 (qd, 2H,  $J = 7.1, 2.0\text{ Hz}$ ), 4.13 (s, 1H), 2.84 – 2.70 (m, 4H), 2.09 – 2.04 (m, 1H), 1.98 – 1.90 (m, 2H), 1.81 – 1.73 (m, 1H), 1.27 (t, 3H,  $J = 7.1\text{ Hz}$ ).  **$^{13}\text{C-NMR}$**  (151 MHz):  $\delta$  172.4, 139.7, 138.8, 131.5, 129.4, 128.3, 121.3, 70.9, 60.9, 45.8, 36.0, 29.2, 19.8, 14.1. **HRMS** (ESI)  $m/z$  calcd for  $\text{C}_{14}\text{H}_{17}\text{BrO}_3\text{Na}$  ( $[\text{M}+\text{Na}]^+$ ) 335.0259; found 335.0247.

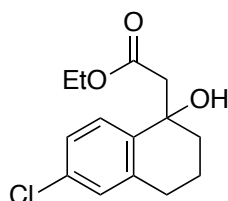

**Ethyl 2-(6-chloro-1-hydroxy-1,2,3,4-tetrahydronaphthalen-1-yl)acetate (S28).**<sup>15</sup> Isolated as a yellow oil (350 mg, 94%). **TLC:**  $R_f$  0.46 (3:1 hexanes/EtOAc). **IR** (ATR, ZnSe): 3487 (O–H st), 2940, 1712 (C=O st), 1597, 1483, 1329, 1200, 1186, 1026, 884, 856.  **$^1\text{H-NMR}$**  (600 MHz):  $\delta$  7.49 (d, 1H,  $J = 8.5\text{ Hz}$ ), 7.17 (dd, 1H,  $J = 8.5, 2.2\text{ Hz}$ ), 7.08 – 7.05 (m, 1H), 4.19



(qd, 2H,  $J = 7.2, 1.9$  Hz), 4.12 (s, 1H), 2.83 – 2.70 (m, 4H), 2.10 – 2.04 (m, 1H), 1.98 – 1.91 (m, 2H), 1.81 – 1.74 (m, 1H), 1.27 (t, 3H,  $J = 7.1$  Hz).  $^{13}\text{C-NMR}$  (151 MHz):  $\delta$  172.4, 139.2, 138.4, 133.0, 128.5, 128.0, 126.5, 70.8, 60.9, 45.9, 36.1, 29.3, 19.8, 14.1. **HRMS** (ESI)  $m/z$  calcd for  $\text{C}_{14}\text{H}_{17}\text{ClO}_3\text{Na}$  ( $[\text{M}+\text{Na}]^+$ ) 291.0764; found 291.0761.

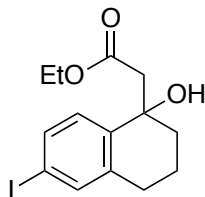

**Ethyl 2-(1-hydroxy-6-iodo-1,2,3,4-tetrahydronaphthalen-1-yl)acetate (S29).**<sup>16</sup> Isolated as a colorless oil (588 mg, 89%). **TLC:**  $R_f$  0.46 (3:1 hexanes/EtOAc). **IR** (ATR, ZnSe): 3482 (O–H st), 2938, 1713 (C=O st), 1585, 1477, 1330, 1199, 1185, 978, 840, 735.  $^1\text{H-NMR}$  (600 MHz):  $\delta$  7.52 (d, 1H,  $J = 8.3$  Hz), 7.45 (s, 1H), 7.30 (d, 1H,  $J = 8.3$  Hz), 4.19 (q, 2H,  $J = 7.1$  Hz), 4.12 (s, 1H), 2.83 – 2.69 (m, 4H), 2.09 – 2.03 (m, 1H), 1.98 – 1.89 (m, 2H), 1.81 – 1.72 (m, 1H), 1.27 (t, 3H,  $J = 7.1$  Hz).  $^{13}\text{C-NMR}$  (151 MHz):  $\delta$  172.4, 140.4, 139.0, 137.6, 135.3, 128.4, 93.3, 70.9, 60.9, 45.8, 36.0, 29.0, 19.8, 14.2. **HRMS** (ESI)  $m/z$  calcd for  $\text{C}_{14}\text{H}_{17}\text{IO}_3\text{Na}$  ( $[\text{M}+\text{Na}]^+$ ) 383.0120; found 383.0114.

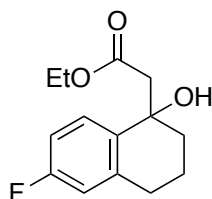

**Ethyl 2-(6-fluoro-1-hydroxy-1,2,3,4-tetrahydronaphthalen-1-yl)acetate (S30).**<sup>17</sup> Isolated as a colorless oil (384 mg, 77%). **TLC:**  $R_f$  0.51 (3:1 hexanes/EtOAc). **IR** (ATR, ZnSe): 3436 (O–H st), 2938, 1716 (C=O st), 1613, 1589, 1496, 1329, 1235, 1195, 1029, 976, 914, 738.  $^1\text{H-NMR}$  (600 MHz):  $\delta$  7.53 (dd, 1H,  $J = 8.7, 5.8$  Hz), 6.90 (td, 1H,  $J = 8.6, 2.7$  Hz), 6.76 (dd, 1H,  $J = 9.6, 2.7$  Hz), 4.20 (qd, 2H,  $J = 7.2, 1.6$  Hz), 4.09 (s, 1H), 2.85 – 2.71 (m, 4H), 2.10 – 2.03 (m, 1H), 2.00 – 1.91 (m, 2H), 1.83 – 1.74 (m, 1H), 1.27 (t, 3H,  $J = 7.1$  Hz).  $^{13}\text{C-NMR}$  (151 MHz):  $\delta$  172.5, 161.8 (d,  $J = 244.6$  Hz), 138.9 (d,  $J = 7.5$  Hz), 136.4 (d,  $J = 3.0$  Hz), 128.4 (d,  $J = 9.1$  Hz), 114.8 (d,  $J = 20.0$  Hz), 113.5 (d,  $J = 21.1$  Hz), 70.8, 60.9, 46.1, 36.2, 29.6 (d,  $J = 1.5$  Hz), 19.9, 14.2. **HRMS** (ESI)  $m/z$  calcd for  $\text{C}_{14}\text{H}_{17}\text{FO}_3\text{Na}$  ( $[\text{M}+\text{Na}]^+$ ) 275.1059; found 275.1072.

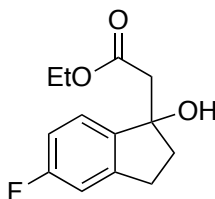

**Ethyl 2-(5-fluoro-1-hydroxy-2,3-dihydro-1H-inden-1-yl)acetate (S31).** Isolated as a colorless oil (450 mg, 95%). **TLC:**  $R_f$  0.44 (3:1 hexanes/EtOAc). **IR** (ATR, ZnSe): 3466 (O–H st), 2982, 1726 (C=O st), 1614, 1598, 1487, 1374, 1333, 1246, 1195, 1130, 1094, 1064, 963, 932, 864, 822, 735.  $^1\text{H-NMR}$  (600 MHz):  $\delta$  7.28 (dd, 1H,  $J = 9.0, 5.3$  Hz), 6.93 – 6.89 (m, 2H), 4.21 (q, 2H,  $J = 7.1$  Hz), 4.18 (s, 1H), 3.03 (dt, 1H,  $J = 16.1, 6.9$  Hz), 2.86 (d, 1H,  $J = 16.0$  Hz), 2.81

(dt, 1H,  $J = 15.7, 7.5$  Hz), 2.69 (d, 1H,  $J = 16.0$  Hz), 2.35 – 2.26 (m, 2H), 1.28 (t, 3H,  $J = 7.1$  Hz).  $^{13}\text{C-NMR}$  (151 MHz):  $\delta$  172.7, 163.2 (d,  $J = 244.6$  Hz), 145.1 (d,  $J = 9.1$  Hz), 141.6 (d,  $J = 3.0$  Hz), 124.2 (d,  $J = 9.1$  Hz), 113.9 (d,  $J = 22.7$  Hz), 111.8 (d,  $J = 21.1$  Hz), 80.3, 61.0, 43.9, 40.6, 29.3 (d,  $J = 3.0$  Hz), 14.1. **HRMS** (ESI)  $m/z$  calcd for  $\text{C}_{13}\text{H}_{15}\text{FO}_3\text{Na}$  ( $[\text{M}+\text{Na}]^+$ ) 261.0903; found 261.0895.

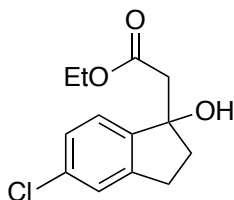

**Ethyl 2-(5-chloro-1-hydroxy-2,3-dihydro-1H-inden-1-yl)acetate (S32).** Isolated as a colorless oil (910 mg, 95%). **TLC:**  $R_f$  0.44 (3:1 hexanes/EtOAc). **IR** (ATR, ZnSe): 3469 (O–H st), 2980, 1727 (C=O st), 1601, 1581, 1474, 1373, 1191, 1071, 1029, 964, 912, 875, 823, 734.  $^1\text{H-NMR}$  (600 MHz):  $\delta$  7.27 – 7.25 (m, 1H), 7.22 – 7.18 (m, 2H), 4.23 (s, 1H), 4.21 (q, 2H,  $J = 7.1$  Hz), 3.01 (dt, 1H,  $J = 16.2, 6.4$  Hz), 2.84 (d, 1H,  $J = 15.9$  Hz), 2.84 – 2.78 (m, 1H), 2.69 (d, 1H,  $J = 16.0$  Hz), 2.32 – 2.24 (m, 2H), 1.28 (t, 3H,  $J = 7.2$  Hz).  $^{13}\text{C-NMR}$  (151 MHz):  $\delta$  172.6, 144.6, 144.5, 134.2, 127.1, 125.1, 124.1, 80.5, 61.0, 43.7, 40.4, 29.2, 14.1. **HRMS** (ESI)  $m/z$  calcd for  $\text{C}_{13}\text{H}_{15}\text{ClO}_3\text{Na}$  ( $[\text{M}+\text{Na}]^+$ ) 277.0607; found 277.0620.

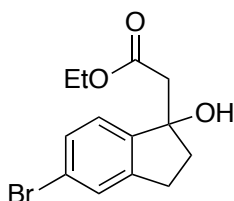

**Ethyl 2-(5-bromo-1-hydroxy-2,3-dihydro-1H-inden-1-yl)acetate (S33).** Isolated as a colorless oil (540 mg, 95%). **TLC:**  $R_f$  0.46 (3:1 hexanes/EtOAc). **IR** (ATR, ZnSe): 3466 (O–H st), 2981, 1725 (C=O st), 1597, 1472, 1373, 1333, 1192, 1063, 1028, 911, 866, 822, 735.  $^1\text{H-NMR}$  (600 MHz):  $\delta$  7.37 (s, 1H), 7.35 (d, 1H,  $J = 8.1$  Hz), 7.21 (d, 1H,  $J = 8.1$  Hz), 4.24 (s, 1H), 4.21 (q, 2H,  $J = 7.1$  Hz), 3.02 (ddd, 1H,  $J = 16.2, 7.4, 5.6$  Hz), 2.83 (d, 1H,  $J = 16.0$  Hz), 2.83 – 2.79 (m, 1H), 2.68 (d, 1H,  $J = 16.0$  Hz), 2.31 – 2.23 (m, 2H), 1.28 (t, 3H,  $J = 7.2$  Hz).  $^{13}\text{C-NMR}$  (151 MHz):  $\delta$  172.6, 145.0, 145.0, 129.9, 128.1, 124.5, 122.4, 80.5, 61.0, 43.6, 40.3, 29.2, 14.1. **HRMS** (ESI)  $m/z$  calcd for  $\text{C}_{13}\text{H}_{15}\text{BrO}_3\text{Na}$  ( $[\text{M}+\text{Na}]^+$ ) 321.0102; found 321.0111.

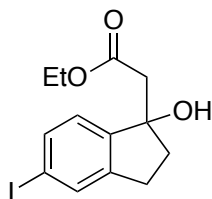

**Ethyl 2-(1-hydroxy-5-iodo-2,3-dihydro-1H-inden-1-yl)acetate (S34).** Isolated as a yellow oil (360 mg, 75%). **TLC:**  $R_f$  0.62 (3:1 hexanes/EtOAc). **IR** (ATR, ZnSe): 3448 (O–H st), 2980, 1718 (C=O st), 1591, 1470, 1401, 1372, 1196, 1028, 912, 821, 736.  $^1\text{H-NMR}$  (600 MHz):  $\delta$  7.59 (s, 1H), 7.56 (d, 1H,  $J = 8.0$  Hz), 7.09 (d, 1H,  $J = 8.0$  Hz), 4.23 (s, 1H), 4.21 (q, 2H,  $J = 7.1$  Hz), 3.01 (ddd, 1H,  $J = 16.2, 7.7, 5.2$  Hz), 2.82 (d, 1H,  $J = 16.0$  Hz), 2.81 – 2.77 (m, 1H), 2.68 (d, 1H,  $J = 16.0$  Hz), 2.30 – 2.21 (m, 2H), 1.28 (t, 3H,  $J = 7.2$  Hz).  $^{13}\text{C-NMR}$  (151 MHz):

$\delta$  172.6, 145.8, 145.2, 135.8, 134.2, 124.8, 94.2, 80.7, 61.0, 43.6, 40.2, 29.1, 14.1. **HRMS** (ESI)  $m/z$  calcd for  $C_{13}H_{15}IO_3Na$  ( $[M+Na]^+$ ) 368.9964; found 368.9969.

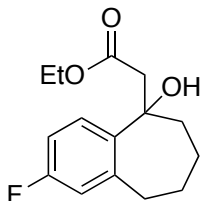

**Ethyl 2-(2-fluoro-5-hydroxy-6,7,8,9-tetrahydro-5H-benzo[7]annulen-5-yl)acetate (S35).**

Isolated as a yellow oil (800 mg, 97%). **TLC**:  $R_f$  0.63 (3:1 hexanes/EtOAc). **IR** (ATR, ZnSe): 3495 (O–H st), 2932, 1711 (C=O st), 1611, 1590, 1493, 1447, 1371, 1329, 1240, 1190, 1097, 1048, 1025, 882, 862, 737.  **$^1H$ -NMR** (600 MHz):  $\delta$  7.62 (dd, 1H,  $J = 8.5, 6.2$  Hz), 6.86 (td, 1H,  $J = 8.4, 2.8$  Hz), 6.78 (dd, 1H,  $J = 9.6, 2.8$  Hz), 4.56 (s, 1H), 4.11 (qd, 2H,  $J = 7.1, 2.7$  Hz), 2.94 (d, 1H,  $J = 15.6$  Hz), 2.90 – 2.84 (m, 3H), 2.04 (ddd, 1H,  $J = 13.4, 6.4, 2.3$  Hz), 1.99 – 1.92 (m, 1H), 1.86 (ddd, 2H,  $J = 13.7, 11.7, 2.7$  Hz), 1.82 – 1.74 (m, 1H), 1.56 – 1.48 (m, 1H), 1.18 (t, 3H,  $J = 7.1$  Hz).  **$^{13}C$ -NMR** (151 MHz):  $\delta$  172.8, 161.4 (d,  $J = 246.1$  Hz), 142.0 (d,  $J = 6.0$  Hz), 140.6 (d,  $J = 3.0$  Hz), 127.7 (d,  $J = 7.5$  Hz), 117.4 (d,  $J = 19.6$  Hz), 112.2 (d,  $J = 19.6$  Hz), 75.5, 60.9, 43.0, 40.4, 36.8, 27.6, 25.7, 14.0. **HRMS** (ESI)  $m/z$  calcd for  $C_{15}H_{19}FO_3Na$  ( $[M+Na]^+$ ) 289.1216; found 289.1224.

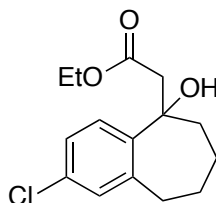

**Ethyl 2-(2-chloro-5-hydroxy-6,7,8,9-tetrahydro-5H-benzo[7]annulen-5-yl)acetate (S36).<sup>25</sup>**

Isolated as a colorless oil (237 mg, 54%). **TLC**:  $R_f$  0.65 (3:1 hexanes/EtOAc). **IR** (ATR, ZnSe): 3486 (O–H st), 2933, 1715 (C=O st), 1479, 1447, 1330, 1192, 1047, 915, 828, 736.  **$^1H$ -NMR** (600 MHz):  $\delta$  7.59 (d, 1H,  $J = 8.5$  Hz), 7.16 (dd, 1H,  $J = 8.5, 2.3$  Hz), 7.07 (d, 1H,  $J = 2.3$  Hz), 4.57 (s, 1H), 4.11 (qd, 2H,  $J = 7.1, 4.7$  Hz), 2.93 (d, 1H,  $J = 15.7$  Hz), 2.90 – 2.83 (m, 3H), 2.04 (ddd, 1H,  $J = 13.4, 6.2, 1.9$  Hz), 1.95 (ddq, 1H,  $J = 12.9, 6.4, 3.3$  Hz), 1.86 (dd, 2H,  $J = 11.9, 2.8$  Hz), 1.81 – 1.73 (m, 1H), 1.51 (td, 1H,  $J = 10.2, 5.2$  Hz), 1.19 (t, 3H,  $J = 7.1$  Hz).  **$^{13}C$ -NMR** (151 MHz):  $\delta$  172.8, 143.4, 141.5, 132.4, 130.6, 127.5, 126.0, 75.5, 60.9, 42.7, 40.4, 36.7, 27.6, 25.7, 14.0. **HRMS** (ESI)  $m/z$  calcd for  $C_{15}H_{19}ClO_3Na$  ( $[M+Na]^+$ ) 305.0920; found 305.0922.

<sup>25</sup> For preparation of 7-chloro- and 7-bromo-2,3,4,5-tetrahydro-benzocycloheptan-1-one, see: Murineddu, G.; Ruiu, S.; Loriga, G.; Manca, I.; Lazzari, P.; Reali, R.; Pani, L.; Toma, L.; Pinna, G. A. *J. Med. Chem.* **2005**, *48*, 7351–7362.

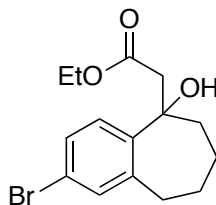

**Ethyl 2-(2-bromo-5-hydroxy-6,7,8,9-tetrahydro-5H-benzo[7]annulen-5-yl)acetate (S37).**<sup>25</sup>

Isolated as a white solid (916 mg, 89%). **TLC:**  $R_f$  0.72 (3:1 hexanes/EtOAc). **IR** (ATR, ZnSe): 3486 (O–H st), 2933, 1712 (C=O st), 1477, 1446, 1395, 1329, 1192, 1163, 1048, 1025, 910, 737. **<sup>1</sup>H-NMR** (600 MHz):  $\delta$  7.53 (d, 1H,  $J = 8.5$  Hz), 7.31 (dd, 1H,  $J = 8.5, 2.2$  Hz), 7.23 (d, 1H,  $J = 2.1$  Hz), 4.57 (s, 1H), 4.11 (qd, 3H,  $J = 7.3, 4.8$  Hz), 2.92 (d, 1H,  $J = 15.7$  Hz), 2.89 – 2.85 (m, 3H), 2.04 (ddd, 1H,  $J = 13.5, 6.5, 2.0$  Hz), 1.95 (ddq, 1H,  $J = 12.8, 6.4, 3.1$  Hz), 1.86 (td, 2H,  $J = 11.9, 2.9$  Hz), 1.81 – 1.73 (m, 1H), 1.54 – 1.46 (m, 1H), 1.19 (t, 3H,  $J = 7.1$  Hz). **<sup>13</sup>C-NMR** (151 MHz):  $\delta$  172.7, 144.0, 141.9, 133.4, 129.0, 127.8, 120.8, 75.5, 61.0, 42.7, 40.3, 36.7, 27.6, 25.7, 14.0. **HRMS** (ESI)  $m/z$  calcd for  $C_{15}H_{19}BrO_3Na$  ( $[M+Na]^+$ ) 349.0415; found 349.0422.

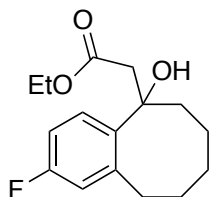

**Ethyl 2-(2-fluoro-5-hydroxy-5,6,7,8,9,10-hexahydrobenzo[8]annulen-5-yl)acetate (S38).**

Isolated as a colorless oil (651 mg, 89%). **TLC:**  $R_f$  0.67 (3:1 hexanes/EtOAc). **IR** (ATR, ZnSe): 3487 (O–H st), 2928, 1712 (C=O st), 1608, 1589, 1490, 1445, 1393, 1331, 1230, 1199, 1164, 1023, 965, 818, 737. **<sup>1</sup>H-NMR** (600 MHz):  $\delta$  7.42 (br s, 1H), 6.82 (td, 1H,  $J = 8.5, 2.6$  Hz), 6.77 (dd, 1H,  $J = 9.7, 2.7$  Hz), 4.39 (s, 1H), 4.10 (qq, 2H,  $J = 7.3, 3.7$  Hz), 3.02 (d, 1H,  $J = 12.3$  Hz), 2.80 (br s, 1H), 2.68 (d, 1H,  $J = 15.8$  Hz), 2.13 – 1.85 (m, 2H), 1.84 – 1.76 (m, 1H), 1.76 – 1.60 (m, 2H), 1.56 – 1.47 (m, 1H), 1.32 (br s, 1H), 1.19 (t, 3H,  $J = 7.1$  Hz), 1.07 (br s, 1H). **<sup>13</sup>C-NMR** (151 MHz):  $\delta$  172.8, 161.94 (d,  $J = 246.1$  Hz), 139.6, 127.6 (2C), 117.64 (d,  $J = 19.6$  Hz), 112.24 (d,  $J = 19.6$  Hz), 76.1, 60.8, 48.1, 43.5, 32.2, 30.6, 23.5, 22.2, 14.1. **HRMS** (ESI)  $m/z$  calcd for  $C_{16}H_{21}FO_3Na$  ( $[M+Na]^+$ ) 303.1372; found 303.1371.

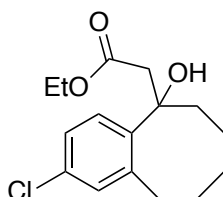

**Ethyl 2-(2-chloro-5-hydroxy-5,6,7,8,9,10-hexahydrobenzo[8]annulen-5-yl)acetate (S39).**<sup>26</sup>

Isolated as a colorless oil (570 mg, 80%). **TLC:**  $R_f$  0.70 (3:1 hexanes/EtOAc). **IR** (ATR, ZnSe): 3486 (O–H st), 2928, 1712 (C=O st), 1478, 1445, 1204, 1158, 1023, 907, 832, 814, 736. **<sup>1</sup>H-NMR** (600 MHz):  $\delta$  7.38 (s, 1H), 7.11 (d, 1H,  $J = 10.1$  Hz), 7.05 (d, 1H,  $J = 2.1$  Hz), 4.41 (s, 1H), 4.10 (qd, 2H,  $J = 7.1, 2.5$  Hz), 3.01 (d, 1H,  $J = 12.7$  Hz), 2.80 (s, 1H), 2.68 (d, 1H,

<sup>26</sup> For preparation of 2-chloro-7,8,9,10-tetrahydrobenzo[8]annulen-5(6H)-one, see: Zhang, Y.; Burgess, J. P.; Brackeen, M.; Gilliam, A.; Mascarella, S. W.; Page, K.; Seltzman, H. H.; Thomas, B. F. *J. Med. Chem.* **2008**, *51*, 3526–3539.

$J = 15.9$  Hz), 2.08 – 1.86 (m, 2H), 1.85 – 1.76 (m, 1H), 1.76 – 1.60 (m, 2H), 1.56 – 1.46 (m, 1H), 1.32 (s, 1H), 1.19 (t, 3H,  $J = 7.1$  Hz), 1.07 (s, 1H).  $^{13}\text{C-NMR}$  (151 MHz):  $\delta$  172.8, 142.4, 132.9, 131.1, 127.6, 127.3, 125.7, 76.2, 60.9, 47.9, 43.2, 32.0, 30.5, 23.5, 22.1, 14.1. **HRMS** (ESI)  $m/z$  calcd for  $\text{C}_{16}\text{H}_{21}\text{ClO}_3\text{Na}$  ( $[\text{M}+\text{Na}]^+$ ) 319.1077; found 319.1080.

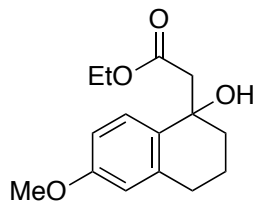

**Ethyl 2-(1-hydroxy-6-methoxy-1,2,3,4-tetrahydronaphthalen-1-yl)acetate (S40).** Isolated as a white solid (390 mg, 97%). **TLC:**  $R_f$  0.43 (3:1 hexanes/EtOAc). **IR** (ATR, ZnSe): 3498 (O–H st), 2937, 1723 (C=O st), 1609, 1502, 1323, 1252, 1197, 1039, 736.  $^1\text{H-NMR}$  (600 MHz):  $\delta$  7.47 (d, 1H,  $J = 8.7$  Hz), 6.78 (dd, 1H,  $J = 8.7, 2.7$  Hz), 6.59 (d, 1H,  $J = 2.5$  Hz), 4.19 (qd, 2H,  $J = 7.1, 2.5$  Hz), 3.93 (s, 1H), 3.78 (s, 3H), 2.87 (d, 1H,  $J = 15.5$  Hz), 2.84 – 2.78 (m, 1H), 2.76 – 2.71 (m, 2H), 2.06 (ddd, 1H,  $J = 13.5, 8.0, 3.0$  Hz), 1.99 – 1.91 (m, 2H), 1.81 – 1.74 (m, 1H), 1.27 (t, 3H,  $J = 7.1$  Hz).  $^{13}\text{C-NMR}$  (151 MHz):  $\delta$  172.6, 158.6, 138.1, 133.0, 127.8, 113.0, 112.7, 70.8, 60.8, 55.2, 46.2, 36.5, 29.9, 20.1, 14.2. **HRMS** (ESI)  $m/z$  calcd for  $\text{C}_{15}\text{H}_{20}\text{O}_4\text{Na}$  ( $[\text{M}+\text{Na}]^+$ ) 287.1259; found 287.1258.

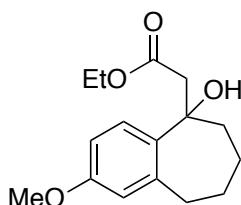

**Ethyl 2-(5-hydroxy-2-methoxy-6,7,8,9-tetrahydro-5H-benzo[7]annulen-5-yl)acetate (S41).** Isolated as a white solid (1.60 g, 74%). **TLC:**  $R_f$  0.55 (3:1 hexanes/EtOAc). **IR** (ATR, ZnSe): 3490 (O–H st), 2932, 1710 (C=O st), 1608, 1578, 1250, 1190, 1037, 912, 735.  $^1\text{H-NMR}$  (600 MHz, Methanol- $d_4$ )  $\delta$  7.53 (d, 1H,  $J = 8.7$  Hz), 6.70 (dd, 1H,  $J = 8.7, 2.8$  Hz), 6.62 (d, 1H,  $J = 2.7$  Hz), 4.02 (qd, 2H,  $J = 7.1, 1.8$  Hz), 3.75 (s, 3H), 2.95 – 2.79 (m, 4H), 2.18 – 2.12 (m, 1H), 1.93 – 1.84 (m, 3H), 1.84 – 1.77 (m, 1H), 1.52 – 1.43 (m, 1H), 1.11 (t, 3H,  $J = 7.1$  Hz).  $^{13}\text{C-NMR}$  (151 MHz, Methanol- $d_4$ ):  $\delta$  173.2, 159.8, 142.3, 138.9, 128.5, 117.5, 111.3, 77.1, 61.4, 55.5, 45.2, 42.0, 37.9, 29.2, 26.8, 14.4. **HRMS** (ESI)  $m/z$  calcd for  $\text{C}_{16}\text{H}_{22}\text{O}_4\text{Na}$  ( $[\text{M}+\text{Na}]^+$ ) 301.1416; found 301.1412.

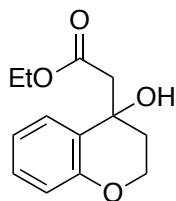

**Ethyl 2-(4-hydroxychroman-4-yl)acetate (S42).** Isolated as a colorless oil (436 mg, 91%). **TLC:**  $R_f$  0.42 (3:1 hexanes/EtOAc). **IR** (ATR, ZnSe): 3484 (O–H st), 2938, 1715 (C=O st), 1609, 1582, 1489, 1452, 1223, 1193, 1059, 757, 737.  $^1\text{H-NMR}$  (600 MHz):  $\delta$  7.4 (dd, 1H,  $J = 7.8, 1.6$  Hz), 7.2 (ddd, 1H,  $J = 8.4, 7.3, 1.6$  Hz), 6.9 (td, 1H,  $J = 7.9, 1.2$  Hz), 6.8 (dd, 1H,  $J = 8.2, 1.1$  Hz), 4.3 (ddd, 1H,  $J = 11.8, 7.9, 4.0$  Hz), 4.2 – 4.2 (m, 3H), 4.1 (s, 1H), 3.1 (d, 1H,

$J = 15.9$  Hz), 2.7 (d, 1H,  $J = 15.9$  Hz), 2.2 – 2.2 (m, 2H), 1.3 (t, 3H,  $J = 7.1$  Hz).  $^{13}\text{C-NMR}$  (151 MHz):  $\delta$  172.4, 154.1, 129.4, 126.7, 126.0, 120.8, 117.2, 66.9, 62.9, 61.1, 45.1, 35.5, 14.1. **HRMS** (ESI)  $m/z$  calcd for  $\text{C}_{13}\text{H}_{16}\text{O}_4\text{Na}$  ( $[\text{M}+\text{Na}]^+$ ) 259.0946; found 259.0959.

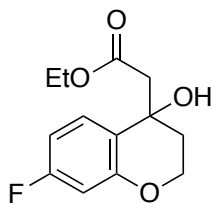

**Ethyl 2-(7-fluoro-4-hydroxychroman-4-yl)acetate (S43).** Isolated as a colorless oil (440mg, 96%). **TLC:**  $R_f$  0.38 (3:1 hexanes/EtOAc). **IR** (ATR, ZnSe): 3468 (O–H st), 2939, 1721 (C=O st), 1616, 1595, 1501, 1432, 1335, 1312, 1194, 1127, 1056, 1028, 850, 806, 733.  $^1\text{H-NMR}$  (600 MHz):  $\delta$  7.39 (dd, 1H,  $J = 8.7, 6.5$  Hz), 6.65 (td, 1H,  $J = 8.5, 2.6$  Hz), 6.53 (dd, 1H,  $J = 10.2, 2.6$  Hz), 4.31 (ddd, 1H,  $J = 11.8, 8.3, 3.7$  Hz), 4.25 – 4.19 (m, 3H), 4.12 (s, 1H), 3.04 (d, 1H,  $J = 15.9$  Hz), 2.69 (d, 1H,  $J = 15.9$  Hz), 2.21 – 2.12 (m, 2H), 1.28 (t, 3H,  $J = 7.1$  Hz).  $^{13}\text{C-NMR}$  (151 MHz):  $\delta$  172.3, 162.96 (d,  $J = 246.1$  Hz), 155.42 (d,  $J = 12.1$  Hz), 128.14 (d,  $J = 10.6$  Hz), 122.16 (d,  $J = 3.0$  Hz), 108.17 (d,  $J = 22.7$  Hz), 103.99 (d,  $J = 24.1$  Hz), 66.6, 63.3, 61.1, 45.0, 35.2, 14.1. **HRMS** (ESI)  $m/z$  calcd for  $\text{C}_{13}\text{H}_{15}\text{FO}_4\text{Na}$  ( $[\text{M}+\text{Na}]^+$ ) 277.0852; found 277.0858.

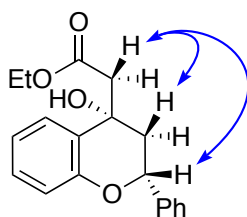

NOESY

**Ethyl 2-((2R\*,4S\*)-4-hydroxy-2-phenylchroman-4-yl)acetate (S44).** Isolated as a colorless oil (385 mg, 92%). **TLC:**  $R_f$  0.49 (3:1 hexanes/EtOAc). **IR** (ATR, ZnSe): 3488 (O–H st), 2983, 1715 (C=O st), 1609, 1582, 1484, 1453, 1222, 1186, 1059, 1028, 914, 757.  $^1\text{H-NMR}$  (600 MHz):  $\delta$  7.54 (dd, 1H,  $J = 7.8, 1.6$  Hz), 7.46 – 7.43 (m, 2H), 7.43 – 7.39 (m, 2H), 7.37 – 7.33 (m, 1H), 7.21 (ddd, 1H,  $J = 8.3, 7.3, 1.7$  Hz), 6.98 (ddd, 1H,  $J = 7.9, 7.3, 1.2$  Hz), 6.89 (dd, 1H,  $J = 8.2, 1.2$  Hz), 5.18 (dd, 1H,  $J = 12.5, 2.2$  Hz), 4.29 (s, 1H), 4.24 (qd, 2H,  $J = 7.1, 4.7$  Hz), 3.03 (d, 1H,  $J = 15.8$  Hz), 2.97 (dd, 1H,  $J = 15.8, 1.4$  Hz), 2.45 (dd, 1H,  $J = 13.9, 2.4$  Hz), 2.36 (ddd, 1H,  $J = 13.9, 12.6, 1.4$  Hz), 1.30 (t, 3H,  $J = 7.1$  Hz).  $^{13}\text{C-NMR}$  (151 MHz):  $\delta$  171.9, 153.7, 140.5, 129.3, 128.7, 128.3, 127.0, 126.3, 126.0, 121.1, 116.9, 76.2, 68.9, 61.2, 46.1, 42.7, 14.2. **HRMS** (ESI)  $m/z$  calcd for  $\text{C}_{19}\text{H}_{20}\text{O}_4\text{Na}$  ( $[\text{M}+\text{Na}]^+$ ) 335.1259; found 335.1262.

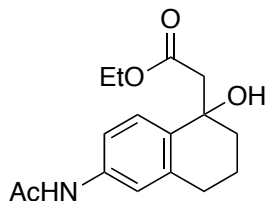

**Ethyl 2-(6-acetamido-1-hydroxy-1,2,3,4-tetrahydronaphthalen-1-yl)acetate (S45).**<sup>27</sup> Isolated as a colorless oil (87.0 mg, 72%). **TLC:**  $R_f$  0.16 (1:1 benzene/EtOAc). **IR** (NaCl, film): 3313 (O–H st), 2937, 1718 (C=O st), 1670, 1613, 1542, 1371. **<sup>1</sup>H-NMR** (600 MHz):  $\delta$  7.49 (d, 1H,  $J = 8.5$  Hz), 7.33 (s, 1H), 7.19 (d, 1H,  $J = 8.5$  Hz), 7.17 (s, 1H), 4.19 (qd, 2H,  $J = 7.2, 2.8$  Hz), 4.06 (s, 1H), 2.88 – 2.68 (m, 4H), 2.16 (s, 3H), 2.11 – 2.02 (m, 1H), 2.00 – 1.89 (m, 2H), 1.83 – 1.70 (m, 1H), 1.27 (t, 3H,  $J = 7.2$  Hz). **<sup>13</sup>C-NMR** (151 MHz):  $\delta$  172.6, 168.2, 137.6, 136.8, 136.7, 127.2, 119.7, 118.0, 70.9, 60.8, 46.0, 36.3, 29.6, 24.7, 20.0, 14.2. **HRMS** (ESI)  $m/z$  calcd for  $C_{16}H_{21}NO_4Na$  ( $[M+Na]^+$ ) 314.1368; found 314.1362.

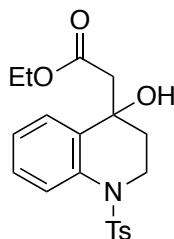

**Ethyl 2-(4-hydroxy-1-tosyl-1,2,3,4-tetrahydroquinolin-4-yl)acetate (S46).** Isolated as a yellow oil (53 mg, 68%). **TLC:**  $R_f$  0.26 (3:1 hexanes/EtOAc). **IR** (ATR, ZnSe): 3478 (O–H st), 2926, 2360, 2341, 1731 (C=O st), 1345, 1307, 1166, 1092, 1072, 910, 737. **<sup>1</sup>H-NMR** (600 MHz):  $\delta$  7.82 (d, 1H,  $J = 8.3$  Hz), 7.52 (d, 2H,  $J = 8.2$  Hz), 7.47 (d, 1H,  $J = 7.8$  Hz), 7.29 (d, 1H,  $J = 8.5$  Hz), 7.22 (d, 2H,  $J = 8.1$  Hz), 7.18 (t, 1H,  $J = 7.5$  Hz), 4.17 – 4.10 (m, 2H), 4.07 (s, 1H), 4.00 – 3.95 (m, 1H), 3.74 (ddd, 1H,  $J = 13.4, 8.1, 4.9$  Hz), 2.63 (d, 1H,  $J = 15.9$  Hz), 2.39 (s, 3H), 1.93 (d, 1H,  $J = 15.9$  Hz), 1.90 – 1.83 (m, 2H), 1.25 (t, 3H,  $J = 7.1$  Hz). **<sup>13</sup>C-NMR** (151 MHz):  $\delta$  172.3, 143.9, 136.5, 135.7, 133.2, 129.7, 128.5, 127.1, 126.8, 125.3, 124.0, 68.3, 61.0, 45.0, 43.4, 35.0, 21.5, 14.1. **HRMS** (ESI)  $m/z$  calcd for  $C_{20}H_{23}NO_5Na$  ( $[M+Na]^+$ ) 412.1195; found 412.1198.

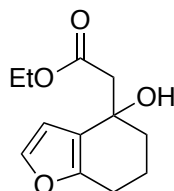

**Ethyl 2-(4-hydroxy-4,5,6,7-tetrahydrobenzofuran-4-yl)acetate (S47).** Isolated as a colorless oil (431 mg, 83%). **TLC:**  $R_f$  0.37 (4:1 hexanes/EtOAc). **IR** (NaCl, film): 3493 (O–H st), 2940, 1713 (C=O st), 1372, 1327, 1196, 1035. **<sup>1</sup>H-NMR** (400 MHz):  $\delta$  7.24 (d, 1H,  $J = 2.1$  Hz), 6.37 (d, 1H,  $J = 2.0$  Hz), 4.21 (q, 2H,  $J = 7.1$  Hz), 4.00 (s, 1H), 2.87 (d, 1H,  $J = 15.7$  Hz), 2.71 – 2.59 (m, 2H), 2.59 – 2.46 (m, 1H), 2.13 – 2.02 (m, 1H), 1.97 (ddd, 1H,  $J = 13.4, 7.5, 2.9$  Hz), 1.85 (ddq, 1H,  $J = 10.9, 5.5, 2.8$  Hz), 1.84 – 1.68 (m, 1H), 1.29 (t, 3H,  $J = 7.1$  Hz). **<sup>13</sup>C-NMR**

<sup>27</sup> For preparation of 6-acetamido-1-tetralone, see: Siqueira, F. A.; Ishikawa, E. E.; Fogaca, A.; Faccio, A. T.; Carneiro, V. M. T.; Soares, R. R. S.; Utaka, A.; Tebeka, I. R. M.; Bielawski, M.; Olofsson, B.; Silva, L. F. *J. Braz. Chem. Soc.* **2011**, *22*, 1795–1807.

(151 MHz):  $\delta$  172.8, 152.0, 141.0, 121.6, 107.6, 68.5, 60.9, 45.1, 36.7, 23.0, 19.4, 14.2. **HRMS** (ESI)  $m/z$  calcd for  $C_{12}H_{16}O_4Na$  ( $[M+Na]^+$ ) 247.0946; found 247.0938.

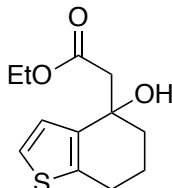

**Ethyl 2-(4-hydroxy-4,5,6,7-tetrahydrobenzo[*b*]thiophen-4-yl)acetate (S48).** Isolated as a colorless oil (260 mg, 82%). **TLC:**  $R_f$  0.15 (9:1 hexanes/EtOAc). **IR** (NaCl, film): 3490 (O–H st), 2937, 1726 (C=O st), 1370, 1188, 1026, 709.  **$^1H$ -NMR** (600 MHz):  $\delta$  7.07 (d, 1H,  $J = 5.3$  Hz), 7.03 (d, 1H,  $J = 5.2$  Hz), 4.20 (q, 2H,  $J = 7.1$  Hz), 3.96 (s, 1H), 2.95 (d, 1H,  $J = 15.5$  Hz), 2.87 – 2.81 (m, 1H), 2.73 (ddd, 1H,  $J = 16.6, 7.5, 5.5$  Hz), 2.68 (d, 1H,  $J = 15.5$  Hz), 2.09 – 2.03 (m, 1H), 2.03 – 1.97 (m, 1H), 1.97 – 1.89 (m, 1H), 1.89 – 1.82 (m, 1H), 1.28 (t, 3H,  $J = 7.1$  Hz).  **$^{13}C$ -NMR** (151 MHz):  $\delta$  172.6, 139.1, 138.6, 124.9, 122.7, 69.6, 60.9, 45.4, 36.2, 25.1, 20.6, 14.2. **HRMS** (ESI)  $m/z$  calcd for  $C_{12}H_{16}O_3SNa$  ( $[M+Na]^+$ ) 263.0718; found 263.0709.

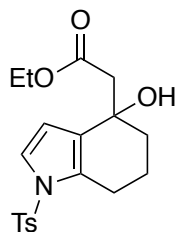

**Ethyl 2-(4-hydroxy-1-tosyl-4,5,6,7-tetrahydro-1H-indol-4-yl)acetate (S49).** Isolated as a colorless oil (184 mg, 94%). **TLC:**  $R_f$  0.28 (96:4  $CH_2Cl_2/Et_2O$ ). **IR** (NaCl, film): 3492 (O–H st), 2941, 1714 (C=O st), 1369, 1177, 1127, 1092, 665.  **$^1H$ -NMR** (400 MHz):  $\delta$  7.68 (d, 2H,  $J = 8.3$  Hz), 7.30 (d, 2H,  $J = 8.2$  Hz), 7.20 (d, 1H,  $J = 3.5$  Hz), 6.28 (d, 1H,  $J = 3.5$  Hz), 4.18 (q, 2H,  $J = 7.2$  Hz), 4.02 (s, 1H), 2.85 (d, 1H,  $J = 15.7$  Hz), 2.67 (t, 2H,  $J = 6.4$  Hz), 2.56 (d, 1H,  $J = 15.8$  Hz), 2.42 (s, 3H), 1.93 (ddd, 1H,  $J = 12.9, 6.4, 3.1$  Hz), 1.86 (ddd, 1H,  $J = 13.2, 7.8, 2.9$  Hz), 1.80 – 1.67 (m, 2H), 1.26 (t, 2H,  $J = 7.1$  Hz).  **$^{13}C$ -NMR** (151 MHz):  $\delta$  172.8, 145.0, 136.0, 130.2, 130.0, 127.0, 121.2, 108.9, 68.4, 60.9, 45.0, 35.9, 22.8, 21.6, 19.6, 14.1 (1 signal not resolved). **HRMS** (ESI)  $m/z$  calcd for  $C_{19}H_{23}NO_5SNa$  ( $[M+Na]^+$ ) 400.1195; found 400.1187.



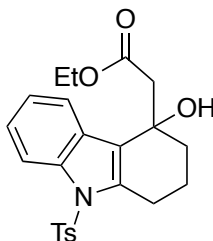

**Ethyl 2-(4-hydroxy-9-tosyl-2,3,4,9-tetrahydro-1H-carbazol-4-yl)acetate (S50).**<sup>28</sup> Isolated as a yellow oil (393 mg, 86%). **TLC:**  $R_f$  0.40 (7:3 hexanes/EtOAc). **IR** (NaCl, film): 3509 (O–H st), 2940, 1718 (C=O st), 1452, 1371, 1174, 1090, 669. **<sup>1</sup>H-NMR** (600 MHz, C<sub>6</sub>D<sub>6</sub>):  $\delta$  8.54 (d, 1H,  $J = 8.5$  Hz), 7.88 (d, 1H,  $J = 7.9$  Hz), 7.57 (d, 2H,  $J = 8.3$  Hz), 7.21 – 7.17 (m, 1H), 7.13 – 7.07 (m, 1H), 6.50 – 6.39 (m, 2H), 3.89 – 3.74 (m, 2H), 3.62 (s, 1H), 3.13 – 2.98 (m, 2H), 2.89 (ddd, 1H,  $J = 17.8, 8.6, 5.8$  Hz), 2.42 (d, 1H,  $J = 15.6$  Hz), 2.06 (ddd, 1H,  $J = 13.3, 7.3, 2.8$  Hz), 1.79 – 1.69 (m, 1H), 1.63 (s, 4H), 1.46 – 1.40 (m, 1H), 0.82 (t, 3H,  $J = 7.1$  Hz). **<sup>13</sup>C-NMR** (151 MHz, C<sub>6</sub>D<sub>6</sub>):  $\delta$  172.24, 144.27, 137.26, 137.05, 136.76, 129.84, 128.30, 126.40, 124.27, 123.61, 122.31, 121.51, 114.82, 70.44, 60.50, 43.39, 36.76, 24.92, 20.98, 20.69, 14.00. **HRMS** (ESI)  $m/z$  calcd for C<sub>23</sub>H<sub>25</sub>NO<sub>5</sub>SNa ([M+Na]<sup>+</sup>) 450.1351; found 450.1359.

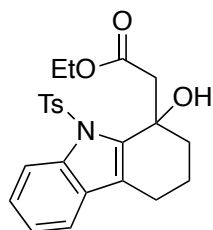

**Ethyl 2-(1-hydroxy-9-tosyl-2,3,4,9-tetrahydro-1H-carbazol-1-yl)acetate (S51).**<sup>29</sup> Isolated as a colorless oil (114 mg, 91%). **TLC:**  $R_f$  0.30 (4:1 hexanes/EtOAc). **IR** (NaCl, film): 3528 (O–H st), 2939, 1731 (C=O st), 1453, 1346, 1171, 1089, 752. **<sup>1</sup>H-NMR** (500 MHz):  $\delta$  8.01 (d, 1H,  $J = 8.3$  Hz), 7.66 (d, 2H,  $J = 8.2$  Hz), 7.31 (d, 1H,  $J = 8.6$  Hz), 7.30 – 7.23 (m, 1H), 7.18 (t, 1H,  $J = 7.4$  Hz), 7.09 (d, 2H,  $J = 8.1$  Hz), 4.92 (s, 1H), 4.05 (qd, 2H,  $J = 7.1, 1.7$  Hz), 3.43 (d, 1H,  $J = 14.3$  Hz), 3.15 (d, 1H,  $J = 14.3$  Hz), 2.68 (dt, 1H,  $J = 16.9, 5.0$  Hz), 2.56 (ddd, 1H,  $J = 16.9, 8.6, 5.3$  Hz), 2.27 (s, 3H), 2.23 (ddd, 1H,  $J = 13.3, 7.1, 2.7$  Hz), 2.16 (t, 1H,  $J = 13.1, 10.7$  Hz), 2.13 – 2.00 (m, 1H), 1.97 – 1.84 (m, 1H), 1.12 (t, 3H,  $J = 7.1$  Hz). **<sup>13</sup>C-NMR** (126 MHz):  $\delta$  170.4, 144.6, 138.5, 137.8, 133.9, 130.3, 129.4, 126.8, 126.7, 125.7, 124.2, 119.3, 116.0, 69.3, 60.4, 46.3, 38.2, 22.6, 21.5, 19.1, 14.1. **HRMS** (ESI)  $m/z$  calcd for C<sub>23</sub>H<sub>25</sub>NO<sub>5</sub>SNa ([M+Na]<sup>+</sup>) 450.1351; found 450.1334.

<sup>28</sup> For preparation of 9-tosyl-1,2,3,9-tetrahydro-4H-carbazol-4-one, see: Gartshore, C. J.; Lupton, D. W. *Aust. J. Chem.* **2013**, *66*, 882–890.

<sup>29</sup> For preparation of 9-tosyl-2,3,4,9-tetrahydro-1H-carbazol-1-one, see: Wu, Z. J.; Li, Y.; Cai, Y.; Yuan, J. Y.; Yuan, C. Y. *Bioorg. Med. Chem. Lett.* **2013**, *23*, 4903–4906.

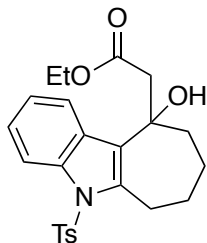

**Ethyl 2-(10-hydroxy-5-tosyl-5,6,7,8,9,10-hexahydrocyclohepta[b]indol-10-yl)acetate (S52).**

Isolated as a light yellow oil (710 mg, 54%). **TLC:**  $R_f$  0.18 (1:4 hexanes/ $\text{CH}_2\text{Cl}_2$ ). **IR** (NaCl, film): 3492 (O–H st), 2937, 1711 (C=O st), 1451, 1368, 1171, 1090, 660.  **$^1\text{H-NMR}$**  (600 MHz):  $\delta$  8.23 (d, 1H,  $J = 8.4$  Hz), 8.04 (d, 1H,  $J = 7.9$  Hz), 7.57 (d, 2H,  $J = 8.4$  Hz), 7.27 – 7.22 (m, 1H), 7.22 – 7.15 (m, 3H), 4.28 – 4.10 (m, 2H), 4.00 (s, 1H), 3.28 (ddd, 1H,  $J = 16.8, 9.0, 3.1$  Hz), 3.20 (ddd, 1H,  $J = 16.6, 8.1, 2.7$  Hz), 3.11 (d, 1H,  $J = 16.0$  Hz), 2.69 (d, 1H,  $J = 15.9$  Hz), 2.35 (s, 3H), 2.17 – 2.09 (m, 2H), 1.84 – 1.62 (m, 4H), 1.25 (t, 3H,  $J = 7.1$  Hz).  **$^{13}\text{C-NMR}$**  (151 MHz):  $\delta$  172.6, 144.7, 137.3, 137.0, 136.1, 129.8, 129.0, 126.3, 125.9, 124.1, 123.4, 121.8, 115.2, 74.1, 61.0, 42.7, 37.7, 25.5, 23.8, 22.0, 21.6, 14.1. **HRMS** (ESI)  $m/z$  calcd for  $\text{C}_{24}\text{H}_{27}\text{NO}_5\text{SNa}$  ( $[\text{M}+\text{Na}]^+$ ) 464.1508; found 464.1521.

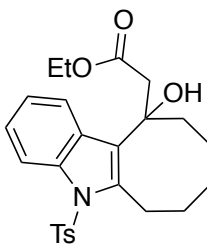

**Ethyl 2-(11-hydroxy-5-tosyl-6,7,8,9,10,11-hexahydro-5H-cycloocta[b]indol-11-yl)acetate (S53).**

Isolated as a colorless oil (654 mg, 77%). **TLC:**  $R_f$  0.20 (1:4 hexanes/ $\text{CH}_2\text{Cl}_2$ ). **IR** (NaCl, film): 3308 (O–H st), 2927, 1726 (C=O st), 1452, 1368, 1176, 1090, 658.  **$^1\text{H-NMR}$**  (600 MHz):  $\delta$  8.24 (d, 1H,  $J = 7.8$  Hz), 8.08 (d, 1H,  $J = 7.8$  Hz), 7.60 (d, 2H,  $J = 8.4$  Hz), 7.28 – 7.19 (m, 2H), 7.19 (d, 2H,  $J = 8.1$  Hz), 4.05 (q, 2H,  $J = 7.2$  Hz), 3.78 (s, 1H), 3.68 (ddd, 1H,  $J = 15.6, 6.3, 3.9$  Hz), 3.16 (d, 1H,  $J = 15.8$  Hz), 3.13 – 2.99 (m, 1H), 2.64 (d, 1H,  $J = 15.9$  Hz), 2.54 – 2.38 (m, 1H), 2.35 (s, 3H), 2.08 (dt, 1H,  $J = 15.5, 5.0$  Hz), 1.99 – 1.89 (m, 1H), 1.78 – 1.64 (m, 2H), 1.64 – 1.57 (m, 1H), 1.44 – 1.27 (m, 2H), 1.14 (t, 3H,  $J = 7.1$  Hz).  **$^{13}\text{C-NMR}$**  (151 MHz):  $\delta$  172.44, 144.58, 136.84, 136.77, 134.43, 129.75, 128.70, 126.23, 124.69, 123.89, 123.12, 122.07, 114.88, 74.07, 60.70, 46.11, 38.51, 26.75, 24.23, 23.61, 22.89, 21.56, 14.03. **HRMS** (ESI)  $m/z$  calcd for  $\text{C}_{25}\text{H}_{29}\text{NO}_5\text{SNa}$  ( $[\text{M}+\text{Na}]^+$ ) 478.1664; found 478.1669.

## 2. SYNTHESIS OF $\beta$ -HYDROXY-*N*-METHOXYAMIDES

### a. General procedure for preparation of $\beta$ -hydroxy-*N*-methoxyamides

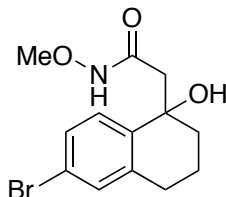

#### 2-(6-Bromo-1-hydroxy-1,2,3,4-tetrahydronaphthalen-1-yl)-*N*-methoxyacetamide (**7a**).

Methoxyamine hydrochloride (0.48 g, 5.8 mmol, 3.0 equiv) was suspended in THF (11 mL) and cooled to 0 °C. A solution of AlMe<sub>3</sub> (2.0 M in hexanes, 2.9 mL, 5.8 mmol, 3.0 equiv) was added by syringe over 5 min and the mixture was stirred for 1 h. A solution of the ester **6a** (0.5 M in THF, 0.6 g, 1.9 mmol, 1.0 equiv) was then added by syringe over 5 min and the reaction was stirred at 0 °C to 24 °C for 16–24 h until complete conversion. The reaction was then cooled to 0 °C and quenched slowly with satd aq Rochelle salt. The mixture was extracted with EtOAc (3 × 20 mL). The combined organic extracts were washed with brine, dried (Na<sub>2</sub>SO<sub>4</sub>), filtered, and concentrated by rotary evaporation to afford the crude product. Purification by silica flash chromatography (0% → 10% MeOH in CH<sub>2</sub>Cl<sub>2</sub>) yielded  $\beta$ -hydroxyamide **7a** as a white solid (580 mg, 96%).

**TLC:**  $R_f$  0.28 (95:5 CH<sub>2</sub>Cl<sub>2</sub>/MeOH). **IR** (ATR, ZnSe): 3382 (O–H st), 2937, 2501, 1670 (C=O st), 1450, 1119, 1043, 975, 823, 751. **<sup>1</sup>H-NMR** (600 MHz, Methanol-*d*<sub>4</sub>):  $\delta$  7.47 (d, 1H,  $J$  = 8.5 Hz), 7.32 (dd, 1H,  $J$  = 8.4, 2.1 Hz), 7.27 – 7.23 (m, 1H), 3.64 (s, 3H), 2.83 – 2.72 (m, 2H), 2.58 (d, 1H,  $J$  = 14.2 Hz), 2.48 (d, 1H,  $J$  = 14.2 Hz), 2.27 – 2.20 (m, 1H), 1.95 – 1.79 (m, 3H). **<sup>13</sup>C-NMR** (151 MHz, Methanol-*d*<sub>4</sub>):  $\delta$  169.8, 141.8, 140.6, 132.4, 130.2, 130.0, 122.0, 72.0, 64.3, 45.6, 37.2, 30.4, 20.8. **HRMS** (ESI)  $m/z$  calcd for C<sub>13</sub>H<sub>16</sub>BrNO<sub>3</sub>Na ([M+Na]<sup>+</sup>) 336.0211; found 336.0219.

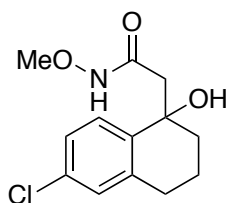

#### 2-(6-Chloro-1-hydroxy-1,2,3,4-tetrahydronaphthalen-1-yl)-*N*-methoxyacetamide (**7b**).

Isolated as a white solid (340 mg, 97%). **TLC:**  $R_f$  0.29 (95:5 CH<sub>2</sub>Cl<sub>2</sub>/MeOH). **IR** (ATR, ZnSe): 3216 (O–H st), 2940, 1650 (C=O st), 1483, 1409, 1093, 1064, 856, 737, 701. **<sup>1</sup>H-NMR** (600 MHz, Methanol-*d*<sub>4</sub>):  $\delta$  7.53 (d, 1H,  $J$  = 8.5 Hz), 7.17 (dd, 1H,  $J$  = 8.5, 2.2 Hz), 7.09 (d, 1H,  $J$  = 2.0 Hz), 3.63 (s, 3H), 2.81 – 2.72 (m, 2H), 2.58 (d, 1H,  $J$  = 14.2 Hz), 2.48 (d, 1H,  $J$  = 14.2 Hz), 2.26 – 2.20 (m, 1H), 1.94 – 1.81 (m, 3H). **<sup>13</sup>C-NMR** (151 MHz, Methanol-*d*<sub>4</sub>):  $\delta$  169.9, 141.3, 140.2, 133.9, 129.7, 129.3, 127.2, 72.0, 64.3, 45.7, 37.2, 30.4, 20.8. **HRMS** (ESI)  $m/z$  calcd for C<sub>13</sub>H<sub>16</sub>ClNO<sub>3</sub>Na ([M+Na]<sup>+</sup>) 292.0716; found 292.0705.

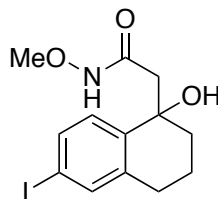

**2-(1-Hydroxy-6-iodo-1,2,3,4-tetrahydronaphthalen-1-yl)-N-methoxyacetamide (7c).**

Isolated as a white solid (420 mg, 93%). **TLC:**  $R_f$  0.27 (95:5 CH<sub>2</sub>Cl<sub>2</sub>/MeOH). **IR** (ATR, ZnSe): 3395 (O–H st), 2967, 2934, 2512, 1682 (C=O st), 1450, 1119, 1044, 976, 751. **<sup>1</sup>H-NMR** (600 MHz, Methanol-*d*<sub>4</sub>): δ 7.52 (dd, 1H,  $J$  = 8.3, 1.8 Hz), 7.46 (s, 1H), 7.32 (d, 1H,  $J$  = 8.3 Hz), 3.64 (s, 3H), 2.81 – 2.70 (m, 2H), 2.57 (d, 1H,  $J$  = 14.2 Hz), 2.48 (d, 1H,  $J$  = 14.2 Hz), 2.26 – 2.20 (m, 1H), 1.94 – 1.79 (m, 3H). **<sup>13</sup>C-NMR** (151 MHz, Methanol-*d*<sub>4</sub>): δ 169.8, 142.4, 140.7, 138.6, 136.3, 130.1, 93.6, 72.1, 64.3, 45.6, 37.1, 30.2, 20.8. **HRMS** (ESI)  $m/z$  calcd for C<sub>13</sub>H<sub>16</sub>INO<sub>3</sub>Na ([M+Na]<sup>+</sup>) 384.0073; found 384.0067.

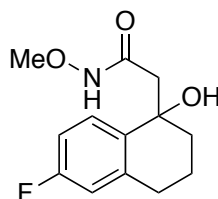

**2-(6-Fluoro-1-hydroxy-1,2,3,4-tetrahydronaphthalen-1-yl)-N-methoxyacetamide (7d).**

Isolated as a colorless oil (352 mg, 92%). **TLC:**  $R_f$  0.34 (95:5 CH<sub>2</sub>Cl<sub>2</sub>/MeOH). **IR** (ATR, ZnSe): 3389 (O–H st), 2939, 2502, 2071, 1649 (C=O st), 1496, 1439, 1241, 1117, 1067, 977, 946. **<sup>1</sup>H-NMR** (600 MHz, Methanol-*d*<sub>4</sub>): δ 7.56 (dd, 1H,  $J$  = 8.7, 5.8 Hz), 6.90 (td, 1H,  $J$  = 8.6, 2.8 Hz), 6.79 (dd, 1H,  $J$  = 9.7, 2.7 Hz), 3.63 (s, 3H), 2.82 – 2.73 (m, 2H), 2.60 (d, 1H,  $J$  = 14.2 Hz), 2.47 (d, 1H,  $J$  = 14.2 Hz), 2.26 – 2.19 (m, 1H), 1.96 – 1.80 (m, 3H). **<sup>13</sup>C-NMR** (151 MHz, Methanol-*d*<sub>4</sub>): δ 170.0, 163.2 (d,  $J$  = 244.6 Hz), 140.7 (d,  $J$  = 7.5 Hz), 138.5 (d,  $J$  = 3.0 Hz), 130.1 (dd,  $J$  = 9.1, 4.5 Hz), 115.5 (dd,  $J$  = 21.1, 3.0 Hz), 114.0 (dd,  $J$  = 21.1, 3.0 Hz), 72.0, 64.3, 45.8, 37.4, 30.7 (d,  $J$  = 1.5 Hz), 20.9. **HRMS** (ESI)  $m/z$  calcd for C<sub>13</sub>H<sub>16</sub>FNO<sub>3</sub>Na ([M+Na]<sup>+</sup>) 276.1021; found 276.1021.

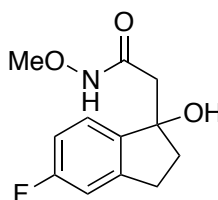

**2-(5-Fluoro-1-hydroxy-2,3-dihydro-1H-inden-1-yl)-N-methoxyacetamide (10a).**

Isolated as a yellow oil (355 mg, 79%). **TLC:**  $R_f$  0.31 (95:5 CH<sub>2</sub>Cl<sub>2</sub>/MeOH). **IR** (ATR, ZnSe): 3400 (O–H st), 2942, 2510, 2073, 1656 (C=O st), 1487, 1441, 1247, 1121, 1084, 976, 865, 823. **<sup>1</sup>H-NMR** (600 MHz, Methanol-*d*<sub>4</sub>): δ 7.33 (dd, 1H,  $J$  = 9.0, 5.3 Hz), 6.96 – 6.91 (m, 2H), 3.62 (s, 3H), 2.98 (ddd, 1H,  $J$  = 16.1, 8.6, 4.3 Hz), 2.84 (dt, 1H,  $J$  = 15.8, 7.6 Hz), 2.61 (d, 1H,  $J$  = 14.0 Hz), 2.53 (ddd, 1H,  $J$  = 12.8, 8.2, 4.3 Hz), 2.45 (d, 1H,  $J$  = 14.0 Hz), 2.19 (ddd, 1H,  $J$  = 13.2, 8.6, 7.1 Hz). **<sup>13</sup>C-NMR** (151 MHz, Methanol-*d*<sub>4</sub>): δ 169.9, 164.7 (d,  $J$  = 244.6 Hz), 146.8 (d,  $J$  = 9.1 Hz), 143.5 (d,  $J$  = 3.0 Hz), 125.7 (d,  $J$  = 10.6 Hz), 114.5 (d,  $J$  = 24.2 Hz), 112.5 (d,  $J$  = 22.7 Hz), 82.0, 64.3, 43.9, 41.2, 30.1 (d,  $J$  = 3.0 Hz). **HRMS** (ESI)  $m/z$  calcd for C<sub>12</sub>H<sub>14</sub>FNO<sub>3</sub>Na ([M+Na]<sup>+</sup>) 262.0855; found 262.0852.

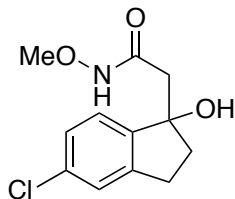

**2-(5-Chloro-1-hydroxy-2,3-dihydro-1*H*-inden-1-yl)-*N*-methoxyacetamide (10b).** Isolated as a colorless oil (473 mg, 94%). **TLC:**  $R_f$  0.24 (95:5 CH<sub>2</sub>Cl<sub>2</sub>/MeOH). **IR** (ATR, ZnSe): 3210 (O–H st), 2972, 1649 (C=O st), 1475, 1439, 1414, 1072, 975, 950, 874, 823, 737. **<sup>1</sup>H-NMR** (600 MHz, Methanol-*d*<sub>4</sub>):  $\delta$  7.31 (d, 1H,  $J$  = 8.0 Hz), 7.24 – 7.20 (m, 2H), 3.62 (s, 3H), 2.97 (ddd, 1H,  $J$  = 16.2, 8.7, 4.2 Hz), 2.84 (dt, 1H,  $J$  = 16.0, 7.7 Hz), 2.59 (d, 1H,  $J$  = 14.0 Hz), 2.52 (ddd, 1H,  $J$  = 12.7, 8.2, 4.2 Hz), 2.45 (d, 1H,  $J$  = 14.0 Hz), 2.17 (ddd, 1H,  $J$  = 13.2, 8.5, 7.4 Hz). **<sup>13</sup>C-NMR** (151 MHz, Methanol-*d*<sub>4</sub>):  $\delta$  169.7, 146.4, 146.4, 135.1, 127.8, 126.0, 125.6, 82.1, 64.3, 43.7, 40.9, 30.0. **HRMS** (ESI)  $m/z$  calcd for C<sub>12</sub>H<sub>14</sub>ClNO<sub>3</sub>Na ([M+Na]<sup>+</sup>) 278.0560; found 278.0568.

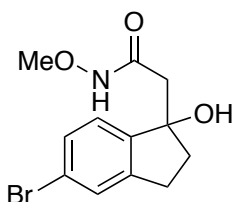

**2-(5-bromo-1-hydroxy-2,3-dihydro-1*H*-inden-1-yl)-*N*-methoxyacetamide (10c).** Isolated as a white solid (450 mg, 90%). **TLC:**  $R_f$  0.28 (95:5 CH<sub>2</sub>Cl<sub>2</sub>/MeOH). **IR** (ATR, ZnSe): 3305 (O–H st), 2939, 1649 (C=O st), 1472, 1439, 1439, 1409, 1200, 1062, 979, 864, 821. **<sup>1</sup>H-NMR** (600 MHz, Methanol-*d*<sub>4</sub>):  $\delta$  7.40 – 7.35 (m, 2H), 7.26 (d, 1H,  $J$  = 8.1 Hz), 3.62 (s, 3H), 2.98 (ddd, 1H,  $J$  = 16.2, 8.7, 4.1 Hz), 2.85 (dt, 1H,  $J$  = 16.0, 7.7 Hz), 2.59 (d, 1H,  $J$  = 14.0 Hz), 2.51 (ddd, 1H,  $J$  = 12.5, 8.1, 4.2 Hz), 2.45 (d, 1H,  $J$  = 14.0 Hz), 2.16 (ddd, 1H,  $J$  = 13.2, 8.6, 7.4 Hz). **<sup>13</sup>C-NMR** (151 MHz, Methanol-*d*<sub>4</sub>):  $\delta$  169.7, 146.9, 146.7, 130.7, 129.0, 126.0, 123.2, 82.2, 64.3, 43.7, 40.9, 30.0. **HRMS** (ESI)  $m/z$  calcd for C<sub>12</sub>H<sub>14</sub>BrNO<sub>3</sub>Na ([M+Na]<sup>+</sup>) 322.0055; found 322.0061.

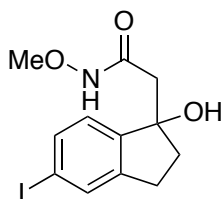

**2-(1-Hydroxy-5-iodo-2,3-dihydro-1*H*-inden-1-yl)-*N*-methoxyacetamide (10d).** Isolated as a yellow oil (280 mg, 80%). **TLC:**  $R_f$  0.35 (95:5 CH<sub>2</sub>Cl<sub>2</sub>/MeOH). **IR** (ATR, ZnSe): 3363 (O–H st), 2942, 1657 (C=O st), 1469, 1439, 1402, 1194, 1119, 978, 820, 735. **<sup>1</sup>H-NMR** (600 MHz, Methanol-*d*<sub>4</sub>):  $\delta$  7.60 (s, 1H), 7.57 (d, 1H,  $J$  = 8.0 Hz), 7.13 (d, 1H,  $J$  = 8.0 Hz), 3.61 (s, 3H), 2.96 (ddd, 1H,  $J$  = 16.1, 8.7, 4.1 Hz), 2.83 (dt, 1H,  $J$  = 16.0, 7.7 Hz), 2.58 (d, 1H,  $J$  = 14.0 Hz), 2.48 (ddd, 1H,  $J$  = 12.5, 8.1, 4.2 Hz), 2.44 (d, 1H,  $J$  = 14.0 Hz), 2.14 (ddd, 1H,  $J$  = 13.2, 8.5, 7.5 Hz). **<sup>13</sup>C-NMR** (151 MHz, Methanol-*d*<sub>4</sub>):  $\delta$  169.7, 147.6, 146.9, 136.8, 135.2, 126.3, 94.6, 82.3, 64.3, 43.7, 40.7, 29.9. **HRMS** (ESI)  $m/z$  calcd for C<sub>12</sub>H<sub>14</sub>INO<sub>3</sub>Na ([M+Na]<sup>+</sup>) 369.9916; found 369.9918.

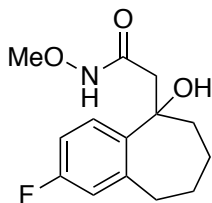

**2-(2-Fluoro-5-hydroxy-6,7,8,9-tetrahydro-5H-benzo[7]annulen-5-yl)-N-methoxyacetamide (12a).** Isolated as a white solid (754 mg, 96%). **TLC:**  $R_f$  0.35 (95:5 CH<sub>2</sub>Cl<sub>2</sub>/MeOH). **IR** (ATR, ZnSe): 3385 (O–H st), 2935, 1648 (C=O st), 1491, 1446, 1241, 1093, 973, 820, 736. **<sup>1</sup>H-NMR** (600 MHz, Methanol-*d*<sub>4</sub>):  $\delta$  7.68 (dd, 1H,  $J$  = 8.8, 6.1 Hz), 6.87 (td, 1H,  $J$  = 8.5, 2.8 Hz), 6.82 (dd, 1H,  $J$  = 9.7, 2.8 Hz), 3.52 (s, 3H), 2.99 (t, 1H,  $J$  = 13.2 Hz), 2.81 (dd, 1H,  $J$  = 14.9, 6.0 Hz), 2.68 (d, 1H,  $J$  = 14.4 Hz), 2.62 (d, 1H,  $J$  = 14.4 Hz), 2.13 (dt, 1H,  $J$  = 12.8, 3.2 Hz), 1.96 – 1.87 (m, 3H), 1.84 – 1.78 (m, 1H), 1.49 – 1.41 (m, 1H). **<sup>13</sup>C-NMR** (151 MHz, Methanol-*d*<sub>4</sub>):  $\delta$  170.3, 162.9 (d,  $J$  = 243.1 Hz), 143.4 (d,  $J$  = 7.5 Hz), 142.4 (d,  $J$  = 3.0 Hz), 129.7 (d,  $J$  = 7.5 Hz), 118.1 (d,  $J$  = 21.1 Hz), 113.0 (d,  $J$  = 19.6 Hz), 77.3, 64.3, 42.3, 41.9, 37.6, 28.9, 26.6. **HRMS** (ESI)  $m/z$  calcd for C<sub>14</sub>H<sub>18</sub>FNO<sub>3</sub>Na ([M+Na]<sup>+</sup>) 290.1168; found 290.1162.

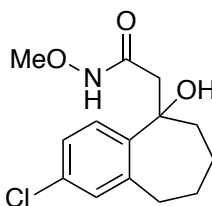

**2-(2-Chloro-5-hydroxy-6,7,8,9-tetrahydro-5H-benzo[7]annulen-5-yl)-N-methoxyacetamide (12b).** Isolated as a clear and colorless oil (137 mg, 85%). **TLC:**  $R_f$  0.33 (95:5 CH<sub>2</sub>Cl<sub>2</sub>/MeOH). **IR** (ATR, ZnSe): 3391 (O–H st), 2938, 1646 (C=O st), 1484, 1245, 1196, 1073, 932, 819, 739. **<sup>1</sup>H-NMR** (600 MHz, Methanol-*d*<sub>4</sub>):  $\delta$  7.66 (d, 1H,  $J$  = 8.5 Hz), 7.16 (d, 1H,  $J$  = 8.5 Hz), 7.10 (s, 1H), 3.52 (s, 3H), 2.98 (t, 1H,  $J$  = 13.7 Hz), 2.81 (dd, 1H,  $J$  = 15.3, 5.2 Hz), 2.67 (d, 1H,  $J$  = 14.4 Hz), 2.62 (d, 1H,  $J$  = 14.3 Hz), 2.17 – 2.10 (m, 1H), 1.96 – 1.87 (m, 3H), 1.84 – 1.78 (m, 1H), 1.48 – 1.39 (m, 1H). **<sup>13</sup>C-NMR** (151 MHz, Methanol-*d*<sub>4</sub>):  $\delta$  170.2, 145.4, 142.9, 133.5, 131.4, 129.4, 126.8, 77.2, 64.3, 42.2, 41.8, 37.5, 28.9, 26.6. **HRMS** (ESI)  $m/z$  calcd for C<sub>14</sub>H<sub>18</sub>ClNO<sub>3</sub>Na ([M+Na]<sup>+</sup>) 306.0873; found 306.0874.

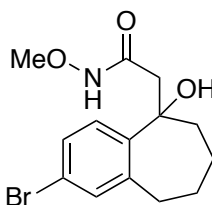

**2-(2-Bromo-5-hydroxy-6,7,8,9-tetrahydro-5H-benzo[7]annulen-5-yl)-N-methoxyacetamide (12c).** Isolated as a white solid (740 mg, 96%). **TLC:**  $R_f$  0.33 (95:5 CH<sub>2</sub>Cl<sub>2</sub>/MeOH). **IR** (ATR, ZnSe): 3391 (O–H st), 2936, 1642 (C=O st), 1477, 1445, 1267, 1075, 978, 738. **<sup>1</sup>H-NMR** (600 MHz, Methanol-*d*<sub>4</sub>):  $\delta$  7.60 (d, 1H,  $J$  = 8.5 Hz), 7.31 (dd, 1H,  $J$  = 8.5, 2.1 Hz), 7.25 (d, 1H,  $J$  = 2.1 Hz), 3.52 (s, 3H), 2.98 (t, 1H,  $J$  = 13.4 Hz), 2.80 (dd, 1H,  $J$  = 14.5, 5.6 Hz), 2.67 (d, 1H,  $J$  = 14.3 Hz), 2.62 (d, 1H,  $J$  = 14.3 Hz), 2.13 (dt, 1H,  $J$  = 12.9, 3.5 Hz), 1.96 – 1.87 (m, 3H), 1.85 – 1.78 (m, 1H), 1.48 – 1.40 (m, 1H). **<sup>13</sup>C-NMR** (151 MHz, Methanol-*d*<sub>4</sub>):  $\delta$  170.2, 145.9, 143.2,

134.3, 129.9, 129.7, 121.6, 77.3, 64.3, 42.1, 41.7, 37.4, 28.9, 26.6. **HRMS** (ESI)  $m/z$  calcd for  $C_{14}H_{18}BrNO_3Na$  ( $[M+Na]^+$ ) 350.0368; found 350.0367.

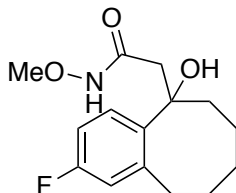

**2-(2-Fluoro-5-hydroxy-5,6,7,8,9,10-hexahydrobenzo[8]annulen-5-yl)-N-methoxyacetamide (14a).** Isolated as a white solid (555 mg, 92%). **TLC:**  $R_f$  0.34 (95:5  $CH_2Cl_2/MeOH$ ). **IR** (ATR, ZnSe): 3196 (O–H st), 2933, 1642 (C=O st), 1491, 1442, 1236, 1061, 961, 871, 821, 737.  **$^1H$ -NMR** (600 MHz, Methanol- $d_4$ ):  $\delta$  7.65 (br s, 1H), 6.89 (td, 1H,  $J = 8.5, 2.8$  Hz), 6.77 (dd, 1H,  $J = 9.8, 2.8$  Hz), 3.49 (s, 3H), 3.08 (br s, 2H), 2.69 – 2.32 (m, 3H), 1.99 (dq, 1H,  $J = 5.5, 4.0$  Hz), 1.88 – 1.72 (m, 2H), 1.71 – 1.63 (m, 1H), 1.59 – 1.51 (m, 1H), 1.22 (br s, 2H).  **$^{13}C$ -NMR** (151 MHz, Methanol- $d_4$ ):  $\delta$  170.0, 163.5 (d,  $J = 244.6$  Hz), 141.6, 130.2 (2C), 118.1 (d,  $J = 21.1$  Hz), 113.3 (d,  $J = 19.6$  Hz), 77.3, 64.3, 49.6, 43.0, 34.2, 30.4, 23.9, 23.9. **HRMS** (ESI)  $m/z$  calcd for  $C_{15}H_{20}FNO_3Na$  ( $[M+Na]^+$ ) 304.1325; found 304.1310.

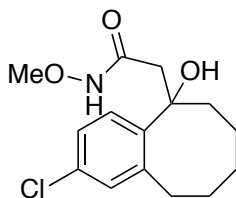

**2-(2-Chloro-5-hydroxy-5,6,7,8,9,10-hexahydrobenzo[8]annulen-5-yl)-N-methoxyacetamide (14b).** Isolated as a white solid (393 mg, 91%). **TLC:**  $R_f$  0.34 (95:5  $CH_2Cl_2/MeOH$ ). **IR** (ATR, ZnSe): 3194 (O–H st), 2932, 1643 (C=O st), 1484, 1441, 1268, 1087, 1061, 738.  **$^1H$ -NMR** (600 MHz, Methanol- $d_4$ ):  $\delta$  7.63 (br s, 1H), 7.17 (dd, 1H,  $J = 8.6, 2.3$  Hz), 7.05 (d, 1H,  $J = 2.3$  Hz), 3.49 (s, 3H), 3.07 (br s, 2H), 2.71 – 2.27 (m, 3H), 2.04 – 1.94 (m, 1H), 1.89 – 1.72 (m, 2H), 1.67 (q, 1H,  $J = 10.3, 7.7$  Hz), 1.55 (ddq, 1H,  $J = 14.9, 9.6, 5.7$  Hz), 1.20 (br s, 2H).  **$^{13}C$ -NMR** (151 MHz, Methanol- $d_4$ ):  $\delta$  169.9, 144.5, 134.0, 131.6, 130.0, 128.7, 126.8, 77.3, 64.2, 49.6, 42.8, 34.0, 30.4, 23.9, 23.8. **HRMS** (ESI)  $m/z$  calcd for  $C_{15}H_{20}ClNO_3Na$  ( $[M+Na]^+$ ) 320.1029; found 320.1030.

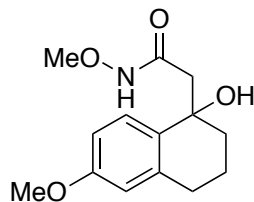

**2-(1-Hydroxy-6-methoxy-1,2,3,4-tetrahydronaphthalen-1-yl)-N-methoxyacetamide (16).** Isolated as a white solid (390 mg, 97%). **TLC:**  $R_f$  0.40 (95:5  $CH_2Cl_2/MeOH$ ). **IR** (ATR, ZnSe): 3206 (O–H st), 2938, 1646 (C=O st), 1608, 1501, 1245, 1039, 838, 738.  **$^1H$ -NMR** (600 MHz, Methanol- $d_4$ ):  $\delta$  7.45 (d, 1H,  $J = 8.7$  Hz), 6.75 (dd, 1H,  $J = 8.7, 2.6$  Hz), 6.60 (d, 1H,  $J = 2.5$  Hz), 3.74 (s, 3H), 3.63 (s, 3H), 2.80 – 2.68 (m, 2H), 2.62 (d, 1H,  $J = 14.2$  Hz), 2.45 (d, 1H,  $J = 14.2$  Hz), 2.22 – 2.15 (m, 1H), 1.94 – 1.86 (m, 2H), 1.84 – 1.77 (m, 1H).  **$^{13}C$ -NMR** (151 MHz, Methanol- $d_4$ ):  $\delta$  170.3, 160.2, 139.5, 134.5, 129.2, 113.8, 113.6, 72.2, 64.4, 55.6,

45.9, 37.7, 31.1, 21.1. **HRMS** (ESI)  $m/z$  calcd for  $C_{14}H_{19}NO_4Na$  ( $[M+Na]^+$ ) 288.1212; found 288.1200.

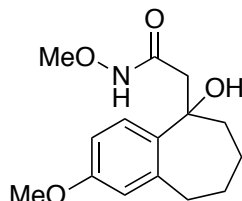

**2-(5-hydroxy-2-methoxy-6,7,8,9-tetrahydro-5H-benzo[7]annulen-5-yl)-N-methoxyacetamide (18)**. Isolated as a white solid (1.10 g, 95%). **TLC**:  $R_f$  0.35 (95:5  $CH_2Cl_2/MeOH$ ). **IR** (ATR, ZnSe): 3401 (O–H st), 2932, 1647 (C=O st), 1495, 1266, 1251, 1066, 1032, 739.  **$^1H$ -NMR** (600 MHz, Methanol- $d_4$ ):  $\delta$  7.56 (d, 1H,  $J = 8.7$  Hz), 6.71 (dd, 1H,  $J = 8.7, 2.8$  Hz), 6.64 (d, 1H,  $J = 2.7$  Hz), 3.75 (s, 3H), 3.50 (s, 3H), 2.95 (t, 1H,  $J = 13.1$  Hz), 2.79 (dd, 1H,  $J = 15.5, 5.2$  Hz), 2.68 (d, 1H,  $J = 14.4$  Hz), 2.59 (d, 1H,  $J = 14.4$  Hz), 2.14 – 2.09 (m, 1H), 1.94 – 1.85 (m, 3H), 1.85 – 1.78 (m, 1H), 1.49 – 1.41 (m, 1H).  **$^{13}C$ -NMR** (151 MHz, Methanol- $d_4$ ):  $\delta$  170.6, 159.9, 142.1, 138.4, 128.8, 117.6, 111.3, 77.4, 64.3, 55.5, 42.6, 42.1, 37.9, 29.1, 26.6. **HRMS** (ESI)  $m/z$  calcd for  $C_{15}H_{21}NO_4Na$  ( $[M+Na]^+$ ) 302.1368; found 302.1361.

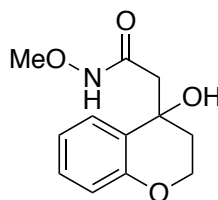

**2-(4-Hydroxychroman-4-yl)-N-methoxyacetamide (20a)**. Isolated as a white solid (360 mg, 90%). **TLC**:  $R_f$  0.28 (95:5  $CH_2Cl_2/MeOH$ ). **IR** (ATR, ZnSe): 3230 (O–H st), 2932, 1650 (C=O st), 1489, 1453, 1266, 1224, 1059, 758, 740.  **$^1H$ -NMR** (600 MHz, Methanol- $d_4$ ):  $\delta$  7.47 (dd, 1H,  $J = 7.8, 1.6$  Hz), 7.14 (ddd, 1H,  $J = 8.3, 7.2, 1.7$  Hz), 6.90 (td, 1H,  $J = 7.9, 1.2$  Hz), 6.76 (dd, 1H,  $J = 8.2, 1.1$  Hz), 4.24 (t, 2H,  $J = 5.6$  Hz), 3.63 (s, 3H), 2.77 (d, 1H,  $J = 14.2$  Hz), 2.52 (d, 1H,  $J = 14.2$  Hz), 2.44 – 2.38 (m, 1H), 2.11 – 2.06 (m, 1H).  **$^{13}C$ -NMR** (151 MHz, Methanol- $d_4$ ):  $\delta$  169.6, 155.7, 130.1, 128.2, 128.2, 121.5, 118.0, 68.2, 64.3, 64.1, 45.0, 36.5. **HRMS** (ESI)  $m/z$  calcd for  $C_{12}H_{15}NO_4Na$  ( $[M+Na]^+$ ) 260.0899; found 260.0900.

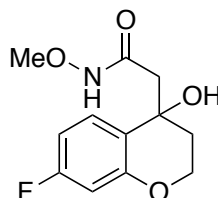

**2-(7-Fluoro-4-hydroxychroman-4-yl)-N-methoxyacetamide (20b)**. Isolated as a white solid (440 mg, 96%). **TLC**:  $R_f$  0.25 (95:5  $CH_2Cl_2/MeOH$ ). **IR** (ATR, ZnSe): 3201 (O–H st), 1650 (C=O st), 1501, 1434, 1260, 1149, 1111, 1056, 977, 850, 737.  **$^1H$ -NMR** (600 MHz, Methanol- $d_4$ ):  $\delta$  7.48 (dd, 1H,  $J = 8.7, 6.6$  Hz), 6.66 (td, 1H,  $J = 8.5, 2.6$  Hz), 6.50 (dd, 1H,  $J = 10.4, 2.6$  Hz), 4.26 (t, 2H,  $J = 5.6$  Hz), 3.64 (s, 3H), 2.74 (d, 1H,  $J = 14.2$  Hz), 2.52 (d, 1H,  $J = 14.2$  Hz), 2.43 – 2.38 (m, 1H), 2.10 – 2.04 (m, 1H).  **$^{13}C$ -NMR** (151 MHz, Methanol- $d_4$ ):  $\delta$  169.5, 164.3 (d,  $J = 244.6$  Hz), 157.1 (d,  $J = 12.1$  Hz), 130.0 (d,  $J = 10.6$  Hz), 124.7



(d,  $J = 3.0$  Hz), 108.6 (d,  $J = 21.1$  Hz), 104.5 (d,  $J = 24.2$  Hz), 68.0, 64.7, 64.4, 45.0, 36.2. **HRMS** (ESI)  $m/z$  calcd for  $C_{12}H_{14}FNO_4Na$  ( $[M+Na]^+$ ) 278.0805; found 278.0813.

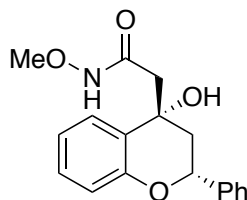

**2-((2R\*,4S\*)-4-Hydroxy-2-phenylchroman-4-yl)-N-methoxyacetamide (22).** Isolated as a white solid (330 mg, 91%). **TLC:**  $R_f$  0.35 (95:5  $CH_2Cl_2/MeOH$ ). **IR** (ATR, ZnSe): 3394 (O–H st), 3034, 1646 (C=O st), 1484, 1453, 1224, 1061, 756.  **$^1H$ -NMR** (600 MHz, Methanol- $d_4$ ):  $\delta$  7.54 (dd, 1H,  $J = 7.8, 1.6$  Hz), 7.48 (d, 2H,  $J = 7.2$  Hz), 7.39 (t, 2H,  $J = 7.6$  Hz), 7.34 – 7.30 (m, 1H), 7.17 (ddd, 1H,  $J = 8.3, 7.3, 1.7$  Hz), 6.95 (td, 1H,  $J = 7.8, 1.1$  Hz), 6.84 (dd, 1H,  $J = 8.2, 1.0$  Hz), 5.31 (dd, 1H,  $J = 12.5, 1.8$  Hz), 3.69 (s, 3H), 2.75 (d, 1H,  $J = 14.2$  Hz), 2.68 (dd, 1H,  $J = 14.2, 1.1$  Hz), 2.61 (dd, 1H,  $J = 13.6, 2.1$  Hz), 2.19 – 2.12 (m, 1H).  **$^{13}C$ -NMR** (151 MHz, Methanol- $d_4$ ):  $\delta$  169.5, 155.2, 142.6, 130.1, 129.9, 129.5, 129.0, 127.7, 126.9, 121.8, 117.7, 77.5, 70.1, 64.4, 46.2, 44.0. **HRMS** (ESI)  $m/z$  calcd for  $C_{18}H_{19}NO_4Na$  ( $[M+Na]^+$ ) 336.1212; found 336.1212.

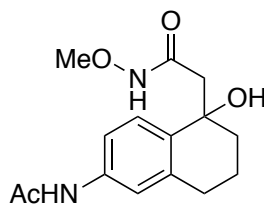

**2-(6-Acetamido-1-hydroxy-1,2,3,4-tetrahydronaphthalen-1-yl)-N-methoxyacetamide (24).** Isolated as a white solid (50.2 mg, 58%). **TLC:**  $R_f$  0.32 (90:10  $CH_2Cl_2/MeOH$ ). **IR** (ATR, ZnSe): 3307 (O–H st), 2941, 1665 (C=O st), 1544, 1416, 1025.  **$^1H$ -NMR** (600 MHz, Methanol- $d_4$ ):  $\delta$  7.49 (d, 1H,  $J = 8.5$  Hz), 7.34 (dd, 1H,  $J = 8.5, 2.2$  Hz), 7.29 (d, 1H,  $J = 2.1$  Hz), 3.63 (s, 3H), 2.82 – 2.68 (m, 2H), 2.61 (d, 1H,  $J = 14.2$  Hz), 2.46 (d, 1H,  $J = 14.2$  Hz), 2.27 – 2.16 (m, 1H), 2.09 (s, 3H), 1.97 – 1.75 (m, 3H).  **$^{13}C$ -NMR** (151 MHz, Methanol- $d_4$ ):  $\delta$  171.7, 170.2, 138.9, 138.7, 138.1, 128.4, 120.8, 119.2, 72.2, 64.4, 45.8, 37.5, 31.0, 23.8, 21.1. **HRMS** (ESI)  $m/z$  calcd for  $C_{15}H_{20}N_2O_4Na$  ( $[M+Na]^+$ ) 315.1321; found 315.1309.

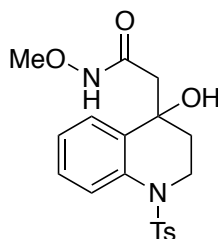

**2-(4-Hydroxy-1-tosyl-1,2,3,4-tetrahydroquinolin-4-yl)-N-methoxyacetamide (26).** Isolated as a white solid (15.2 mg, 76%). **TLC:**  $R_f$  0.22 (95:5  $CH_2Cl_2/MeOH$ ). **IR** (ATR, ZnSe): 3436 (O–H st), 1763 (C=O st), 1488, 1451, 1307, 1163, 1092, 814, 762, 729.  **$^1H$ -NMR** (600 MHz, Methanol- $d_4$ ):  $\delta$  7.75 (d, 1H,  $J = 8.3$  Hz), 7.56 (d, 2H,  $J = 8.3$  Hz), 7.52 (dd, 1H,  $J = 7.8, 1.5$  Hz),

7.31 (d, 2H,  $J = 8.1$  Hz), 7.23 (ddd, 1H,  $J = 8.5, 7.2, 1.6$  Hz), 7.15 (td, 1H,  $J = 7.9, 1.1$  Hz), 4.02 (ddd, 1H,  $J = 13.5, 7.9, 3.9$  Hz), 3.79 (ddd, 1H,  $J = 13.4, 8.5, 3.7$  Hz), 3.60 (s, 3H), 2.40 – 2.37 (m, 4H), 2.13 (ddd, 1H,  $J = 12.6, 8.5, 3.9$  Hz), 1.85 (d, 1H,  $J = 14.2$  Hz), 1.80 (ddd, 1H,  $J = 13.9, 7.9, 3.7$  Hz).  $^{13}\text{C-NMR}$  (151 MHz, Methanol- $d_4$ ):  $\delta$  169.2, 145.7, 137.8, 137.1, 135.7, 131.0, 129.1, 128.4, 128.3, 125.9, 124.2, 69.6, 64.4, 45.0, 44.6, 35.5, 21.5. **HRMS** (ESI)  $m/z$  calcd for  $\text{C}_{19}\text{H}_{20}\text{N}_2\text{O}_4\text{Na}$  ( $[\text{M}+\text{Na}]^+$ ) 411.0991; found 411.0997.

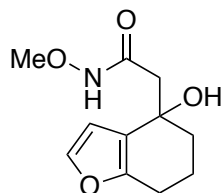

**2-(4-Hydroxy-4,5,6,7-tetrahydrobenzofuran-4-yl)-N-methoxyacetamide (28).** Isolated as a colorless oil (381 mg, 88%). **TLC:**  $R_f$  0.22 (1:3 hexanes/EtOAc). **IR** (NaCl, film): 3208 (O–H st), 2939, 1653 (C=O st), 1508, 1438, 1060, 942.  $^1\text{H-NMR}$  (600 MHz):  $\delta$  9.27 (s, 1H), 7.22 (d, 1H,  $J = 2.2$  Hz), 6.36 (d, 1H,  $J = 2.1$  Hz), 4.03 (s, 1H), 3.77 (s, 3H), 2.69 – 2.58 (m, 2H), 2.58 – 2.45 (m, 1H), 2.37 (d, 1H,  $J = 14.7$  Hz), 2.07 – 1.94 (m, 1H), 1.91 (ddd, 1H,  $J = 13.2, 7.8, 2.9$  Hz), 1.89 – 1.79 (m, 1H), 1.76 (ddd, 1H,  $J = 13.1, 10.1, 2.9$  Hz).  $^{13}\text{C-NMR}$  (151 MHz):  $\delta$  169.6, 152.0, 141.2, 121.6, 107.5, 69.1, 64.4, 44.1, 36.6, 22.9, 19.5. **HRMS** (ESI)  $m/z$  calcd for  $\text{C}_{11}\text{H}_{14}\text{NO}_4\text{Na}$  ( $[\text{M}-\text{H}]^-$ ) 224.0923; found 224.0926.

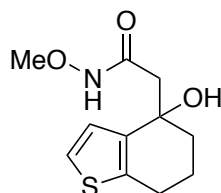

**2-(4-Hydroxy-4,5,6,7-tetrahydrobenzo[b]thiophen-4-yl)-N-methoxyacetamide (29).** Isolated as a colorless oil (251 mg, 96%). **TLC:**  $R_f$  0.42 (1:3 hexanes/EtOAc). **IR** (NaCl, film): 3210 (O–H st), 2938, 1639 (C=O st), 1438, 1210, 1055.  $^1\text{H-NMR}$  (600 MHz):  $\delta$  = 9.24 (s, 1H), 7.06 (d, 1H,  $J = 5.3$  Hz), 7.00 (d, 1H,  $J = 5.3$  Hz), 4.01 (s, 1H), 3.76 (s, 3H), 2.88 – 2.59 (m, 3H), 2.35 (d, 1H,  $J = 14.6$  Hz), 2.12 – 1.77 (m, 4H) ppm  $^{13}\text{C-NMR}$  (151 MHz):  $\delta$  169.4, 139.2, 138.7, 124.8, 123.0, 70.0, 64.4, 44.4, 36.0, 25.0, 20.7. **HRMS** (ESI)  $m/z$  calcd for  $\text{C}_{11}\text{H}_{15}\text{NO}_3\text{Na}$  ( $[\text{M}+\text{Na}]^+$ ) 264.0670; found 264.0669.

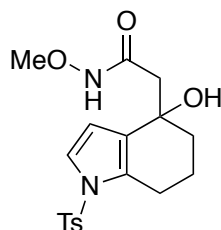

**2-(4-Hydroxy-1-tosyl-4,5,6,7-tetrahydro-1H-indol-4-yl)-N-methoxyacetamide (32).** Isolated as a colorless oil (136 mg, 81%). **TLC:**  $R_f$  0.31 (95:5  $\text{CH}_2\text{Cl}_2/\text{MeOH}$ ). **IR** (NaCl, film): 3207 (O–H st), 2940, 1655 (C=O st), 1597, 1366, 1176, 814.  $^1\text{H-NMR}$  (600 MHz):  $\delta$  8.73 (s, 1H), 7.68 (d, 2H,  $J = 8.0$  Hz), 7.30 (d, 2H,  $J = 8.1$  Hz), 7.21 (d, 1H,  $J = 3.5$  Hz), 6.28 (d, 1H,  $J = 3.5$  Hz), 3.78 (s, 3H), 3.73 (s, 1H), 2.74 – 2.57 (m, 3H), 2.43 (s, 3H), 2.32 (d, 1H,  $J = 14.6$  Hz), 1.92 – 1.85 (m, 1H), 1.85 – 1.67 (m, 3H).  $^{13}\text{C-NMR}$  (151 MHz):  $\delta$  169.5, 145.2,

135.8, 130.1, 127.1, 121.5, 108.7, 68.9, 64.5, 44.4, 35.9, 22.7, 21.7, 19.6 (2 signals not resolved). **HRMS** (ESI)  $m/z$  calcd for  $C_{18}H_{22}N_2O_5SNa$  ( $[M+Na]^+$ ) 401.1147; found 401.1137.

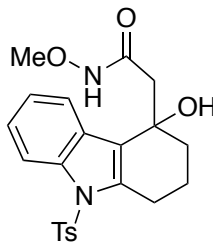

**2-(4-Hydroxy-9-tosyl-2,3,4,9-tetrahydro-1H-carbazol-4-yl)-N-methoxyacetamide (34).**

Isolated as a colorless oil (388 mg, 86%). **TLC**:  $R_f$  0.42 (1:3 hexanes/EtOAc). **IR** (NaCl, film): 3200 (O–H st), 2940, 1655 (C=O st), 1451, 1370, 1174, 1091, 661.  **$^1H$ -NMR** (600 MHz):  $\delta$  8.90 (s, 1H), 8.16 (d, 1H,  $J = 8.3$  Hz), 7.75 (d, 1H,  $J = 7.8$  Hz), 7.66 (d, 2H,  $J = 8.1$  Hz), 7.26 (dd, 1H,  $J = 15.7, 1.4$  Hz), 7.25 – 7.18 (m, 3H), 3.85 (s, 1H), 3.75 (s, 3H), 3.16 – 3.01 (m, 2H), 2.95 – 2.86 (m, 1H), 2.42 – 2.29 (m, 4H), 2.16 – 2.06 (m, 1H), 2.07 – 1.91 (m, 1H), 1.86 (t, 1H,  $J = 12.2$  Hz), 1.83 – 1.69 (m, 1H) ppm.  **$^{13}C$ -NMR** (151 MHz):  $\delta$  169.4, 145.0, 136.5, 136.4, 135.9, 130.0, 127.2, 126.4, 124.1, 123.4, 121.2, 120.7, 114.3, 70.8, 64.4, 42.4, 36.2, 24.4, 21.6, 20.6. **HRMS** (ESI)  $m/z$  calcd for  $C_{22}H_{24}N_2O_5SNa$  ( $[M+Na]^+$ ) 451.1304; found 451.1310.

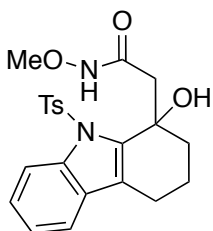

**2-(1-Hydroxy-9-tosyl-2,3,4,9-tetrahydro-1H-carbazol-1-yl)-N-methoxyacetamide (36).**

Isolated as a white solid (124 mg, 91%). **TLC**:  $R_f$  0.22 (1:1 hexanes/EtOAc). **IR** (NaCl, film): 3200 (O–H st), 2940, 1655 (C=O st), 1452, 1357, 1172, 1089, 704.  **$^1H$ -NMR** (600 MHz):  $\delta$  8.95 (s, 1H), 7.96 (d, 1H,  $J = 8.3$  Hz), 7.58 (d, 2H,  $J = 8.0$  Hz), 7.33 (d, 1H,  $J = 7.7$  Hz), 7.29 (d, 1H,  $J = 8.5$  Hz), 7.21 (t, 1H,  $J = 7.5$  Hz), 7.12 (d, 2H,  $J = 8.1$  Hz), 5.07 (s, 1H), 3.70 (s, 3H), 3.46 (d, 1H,  $J = 14.5$  Hz), 2.75 – 2.64 (m, 2H), 2.58 (ddd, 1H,  $J = 17.0, 8.4, 5.4$  Hz), 2.36 – 2.22 (m, 4H), 2.17 (t, 1H,  $J = 12.0, 10.8$  Hz), 2.11 – 1.98 (m, 1H), 1.98 – 1.87 (m, 1H).  **$^{13}C$ -NMR** (151 MHz):  $\delta$  167.8, 145.1, 138.1, 137.7, 133.4, 130.2, 129.6, 127.3, 126.6, 126.1, 124.6, 119.6, 115.9, 69.4, 64.4, 46.0, 37.4, 22.5, 21.6, 19.0. **HRMS** (ESI)  $m/z$  calcd for  $C_{22}H_{24}N_2O_5SNa$  ( $[M+Na]^+$ ) 451.1304; found 451.1307.

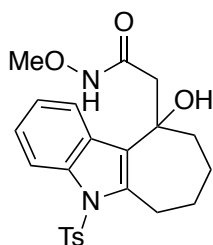

**2-(10-hydroxy-5-tosyl-5,6,7,8,9,10-hexahydrocyclohepta[b]indol-10-yl)-N-methoxyacetamide (38).** Isolated as a colorless oil (664 mg, 93%). **TLC**:  $R_f$  0.20 (1:1 hexanes/EtOAc). **IR** (NaCl, film): 3204 (O–H st), 2935, 1658 (C=O st), 1642, 1451, 1367,

1171, 1089, 660.  $^1\text{H-NMR}$  (600 MHz):  $\delta$  8.69 (s, 1H), 8.25 (d, 1H,  $J = 8.4$  Hz), 8.00 (d, 1H,  $J = 7.9$  Hz), 7.58 (d, 2H,  $J = 8.3$  Hz), 7.31 – 7.16 (m, 4H), 3.73 (s, 3H), 3.55 (s, 1H), 3.29 – 3.14 (m, 2H), 3.05 (d, 1H,  $J = 15.0$  Hz), 2.41 (d, 1H,  $J = 14.9$  Hz), 2.36 (s, 3H), 2.19 (dt, 1H,  $J = 14.2, 4.4$  Hz), 2.07 (t, 1H,  $J = 13.1$  Hz), 1.86 – 1.70 (m, 3H), 1.70 – 1.61 (m, 1H) ppm.  $^{13}\text{C-NMR}$  (151 MHz):  $\delta$  169.2, 144.9, 137.4, 136.9, 136.1, 129.8, 128.7, 126.3, 125.6, 124.3, 123.4, 121.5, 115.3, 74.6, 64.5, 42.4, 37.7, 25.3, 23.9, 21.8, 21.6. **HRMS** (ESI)  $m/z$  calcd for  $\text{C}_{23}\text{H}_{26}\text{N}_2\text{O}_5\text{SNa}$  ( $[\text{M}+\text{Na}]^+$ ) 465.1460; found 465.1464.

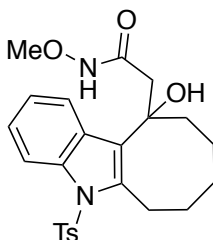

**2-(11-hydroxy-5-tosyl-6,7,8,9,10,11-hexahydro-5H-cycloocta[b]indol-11-yl)-N-methoxyacetamide (40).** Isolated as a colorless oil (546 mg, 83%). **TLC:**  $R_f$  0.17 (1:1 hexanes/EtOAc). **IR** (NaCl, film): 3208 (O–H st), 2933, 1655 (C=O st), 1452, 1366, 1176, 1090, 659.  $^1\text{H-NMR}$  (400 MHz):  $\delta$  8.48 (s, 1H), 8.26 (d, 1H,  $J = 8.3$  Hz), 8.07 (d, 1H,  $J = 7.9$  Hz), 7.61 (d, 2H,  $J = 8.0$  Hz), 7.31 – 7.21 (m, 2H), 7.20 (d, 2H,  $J = 8.1$  Hz), 3.63 (s, 3H), 3.56 (s, 1H), 3.06 (d, 1H,  $J = 14.8$  Hz), 3.05 – 2.94 (m, 1H), 2.57 – 2.44 (m, 1H), 2.36 (s, 3H), 2.31 (d, 1H,  $J = 14.8$  Hz), 2.10 (d, 1H,  $J = 15.6$  Hz), 1.95 – 1.82 (m, 1H), 1.78 – 1.61 (m, 3H), 1.44 – 1.29 (m, 3H) ppm.  $^{13}\text{C-NMR}$  (151 MHz):  $\delta$  169.1, 144.8, 136.8, 136.7, 134.2, 129.9, 128.4, 126.2, 124.3, 124.1, 123.2, 121.8, 115.0, 74.5, 64.4, 45.7, 37.8, 26.3, 24.3, 23.5, 22.8, 21.6. **HRMS** (ESI)  $m/z$  calcd for  $\text{C}_{24}\text{H}_{28}\text{N}_2\text{O}_5\text{SNa}$  ( $[\text{M}+\text{Na}]^+$ ) 479.1617; found 479.1593.

### 3. SYNTHESIS OF MEDIUM RINGS VIA TANDEM ODRE

#### a. General procedure for tandem oxidative dearomatization–ring expanding rearomatization reactions

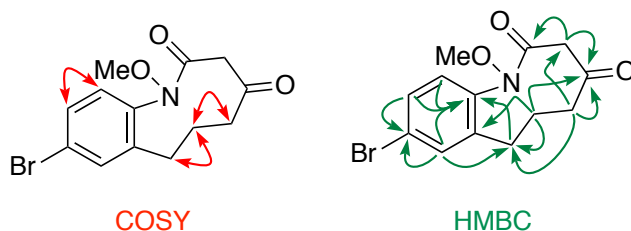

#### **9-Bromo-1-methoxy-1,5,6,7-tetrahydro-2H-benzo[b]azonine-2,4(3H)-dione (9a).**

*N*-Methoxyamide **7a** (0.10 g, 0.32 mmol, 1.0 equiv) was dissolved in nitromethane (3.2 mL) and cooled to 0 °C. [Bis(trifluoroacetoxy)iodo]benzene (PIFA) (0.21 g, 0.48 mmol, 1.5 equiv) was added as a solid and the reaction was stirred at 0 °C to 24 °C for 0.5–1 h until complete conversion. The reaction was then quenched with satd aq  $\text{NaHCO}_3$ . The mixture was extracted with  $\text{CH}_2\text{Cl}_2$  (4 × 10 mL). The combined organic extracts were washed with brine, dried ( $\text{Na}_2\text{SO}_4$ ), filtered, and concentrated by rotary evaporation to afford the crude product. Purification by silica flash chromatography (0% → 5% MeOH in  $\text{CH}_2\text{Cl}_2$ ) yielded 9-membered lactam **9a** as a colorless oil (72 mg, 73%).

**TLC:**  $R_f$  0.38 (95:5 CH<sub>2</sub>Cl<sub>2</sub>/MeOH). **IR** (ATR, ZnSe): 2936, 1716 (C=O st), 1679 (C=O st), 1478, 1440, 1081, 1043, 984, 737. **<sup>1</sup>H-NMR** (600 MHz)  $\delta$  7.47 – 7.44 (m, 2H), 7.10 (d, 1H,  $J$  = 8.9 Hz), 3.83 (s, 3H), 3.32 (d, 1H,  $J$  = 16.1 Hz), 3.13 (d, 1H,  $J$  = 16.1 Hz), 2.86 – 2.79 (m, 2H), 2.75 – 2.70 (m, 1H), 2.24 – 2.16 (m, 2H), 2.05 – 1.96 (m, 1H). **<sup>13</sup>C-NMR** (151 MHz):  $\delta$  204.4, 163.9, 144.7, 135.1, 134.7, 131.3, 130.9, 126.0, 61.4, 54.5, 39.8, 31.1, 30.8. **HRMS** (ESI)  $m/z$  calcd for C<sub>13</sub>H<sub>14</sub>BrNO<sub>3</sub>Na ([M+Na]<sup>+</sup>) 334.0055; found 334.0056.

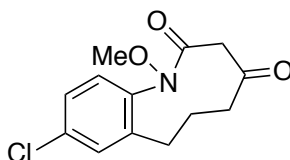

**9-Chloro-1-methoxy-1,5,6,7-tetrahydro-2H-benzo[b]azonine-2,4(3H)-dione (9b).** Isolated as a yellow solid (48.5 mg, 72%). **TLC:**  $R_f$  0.39 (95:5 CH<sub>2</sub>Cl<sub>2</sub>/MeOH). **IR** (ATR, ZnSe): 2934, 1716 (C=O st), 1677 (C=O st), 1480, 1439, 1088, 1038, 734. **<sup>1</sup>H-NMR** (600 MHz)  $\delta$  7.32 – 7.28 (m, 2H), 7.17 (d, 1H,  $J$  = 8.6 Hz), 3.83 (s, 3H), 3.32 (d, 1H,  $J$  = 16.1 Hz), 3.13 (d, 1H,  $J$  = 16.1 Hz), 2.87 – 2.80 (m, 2H), 2.75 – 2.70 (m, 1H), 2.24 – 2.16 (m, 2H), 2.05 – 1.96 (m, 1H). **<sup>13</sup>C-NMR** (151 MHz):  $\delta$  204.4, 164.0, 144.5, 137.7, 134.7, 131.7, 130.7, 128.4, 61.4, 54.5, 39.8, 31.2, 30.8. **HRMS** (ESI)  $m/z$  calcd for C<sub>13</sub>H<sub>14</sub>ClNO<sub>3</sub>Na ([M+Na]<sup>+</sup>) 290.0560; found 290.0557.

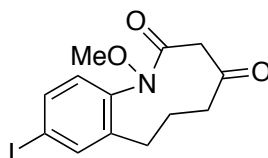

**9-Iodo-1-methoxy-1,5,6,7-tetrahydro-2H-benzo[b]azonine-2,4(3H)-dione (9c).** Isolated as a colorless oil (75.1 mg, 75%). **TLC:**  $R_f$  0.41 (95:5 CH<sub>2</sub>Cl<sub>2</sub>/MeOH). **IR** (ATR, ZnSe): 2935, 1714 (C=O st), 1679 (C=O st), 1477, 1440, 1076, 1041, 984, 825, 737. **<sup>1</sup>H-NMR** (600 MHz):  $\delta$  7.68 – 7.64 (m, 2H), 6.95 (d, 1H,  $J$  = 8.2 Hz), 3.82 (s, 3H), 3.31 (d, 1H,  $J$  = 16.1 Hz), 3.13 (d, 1H,  $J$  = 16.1 Hz), 2.85 – 2.76 (m, 2H), 2.73 – 2.68 (m, 1H), 2.24 – 2.14 (m, 2H), 2.05 – 1.95 (m, 1H). **<sup>13</sup>C-NMR** (151 MHz):  $\delta$  204.4, 163.9, 144.7, 140.7, 137.3, 135.8, 130.9, 98.2, 61.4, 54.4, 39.8, 30.9, 30.8. **HRMS** (ESI)  $m/z$  calcd for C<sub>13</sub>H<sub>14</sub>INO<sub>3</sub>Na ([M+Na]<sup>+</sup>) 381.9916; found 381.9933.

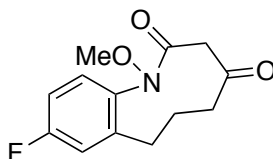

**9-Fluoro-1-methoxy-1,5,6,7-tetrahydro-2H-benzo[b]azonine-2,4(3H)-dione (9d).** Isolated as a yellow solid (80.4 mg, 81%). **TLC:**  $R_f$  0.38 (95:5 CH<sub>2</sub>Cl<sub>2</sub>/MeOH). **IR** (ATR, ZnSe): 2937, 1716 (C=O st), 1680 (C=O st), 1493, 1270, 1044, 972, 738. **<sup>1</sup>H-NMR** (600 MHz):  $\delta$  7.22 (dd, 1H,  $J$  = 8.5, 5.2 Hz), 7.04 – 6.98 (m, 2H), 3.84 (s, 3H), 3.32 (d, 1H,  $J$  = 16.0 Hz), 3.13 (d, 1H,  $J$  = 16.0 Hz), 2.88 – 2.81 (m, 2H), 2.77 – 2.71 (m, 1H), 2.24 – 2.16 (m, 2H), 2.06 – 1.97 (m, 1H). **<sup>13</sup>C-NMR** (151 MHz):  $\delta$  204.4, 164.1, 164.0 (d,  $J$  = 253.7 Hz), 145.6 (d,  $J$  = 9.1 Hz), 132.2 (d,  $J$  = 3.0 Hz), 131.4 (d,  $J$  = 9.1 Hz), 118.2 (d,  $J$  = 22.7 Hz), 115.3 (d,  $J$  = 22.7 Hz), 61.3, 54.6, 39.8, 31.4 (d,  $J$  = 1.5 Hz), 30.8. **HRMS** (ESI)  $m/z$  calcd for C<sub>13</sub>H<sub>14</sub>FNO<sub>3</sub>Na ([M+Na]<sup>+</sup>) 274.0855; found 274.0850.

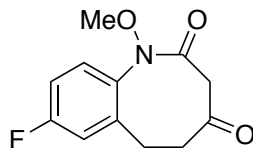

**8-Fluoro-1-methoxy-5,6-dihydrobenzo[*b*]azocine-2,4(1*H*,3*H*)-dione (11a).** Isolated as a red oil (45.8 mg, 46%). **TLC:**  $R_f$  0.48 (95:5 CH<sub>2</sub>Cl<sub>2</sub>/MeOH). **IR** (ATR, ZnSe): 2938, 1716 (C=O st), 1679 (C=O st), 1493, 1429, 1354, 1253, 1040, 912, 824, 736. **<sup>1</sup>H-NMR** (600 MHz):  $\delta$  7.50 (dd, 1H,  $J = 8.8, 5.2$  Hz), 7.13 (td, 1H,  $J = 8.3, 2.9$  Hz), 7.10 (dd, 1H,  $J = 8.7, 2.8$  Hz), 3.83 (s, 3H), 3.36 (d, 1H,  $J = 12.0$  Hz), 3.25 (d, 1H,  $J = 12.0$  Hz), 3.16 – 3.10 (m, 1H), 2.94 – 2.87 (m, 2H), 2.59 – 2.51 (m, 1H). **<sup>13</sup>C-NMR** (151 MHz):  $\delta$  199.8, 162.9 (d,  $J = 252.2$  Hz), 162.3 140.3 (d,  $J = 7.5$  Hz), 134.5 (d,  $J = 3.0$  Hz), 128.7 (d,  $J = 9.1$  Hz), 116.9 (d,  $J = 22.7$  Hz), 116.1 (d,  $J = 22.7$  Hz), 61.8, 50.9, 43.5, 27.3 (d,  $J = 1.5$  Hz). **HRMS** (ESI)  $m/z$  calcd for C<sub>12</sub>H<sub>12</sub>FNO<sub>3</sub>Na ([M+Na]<sup>+</sup>) 260.0699; found 260.0701.

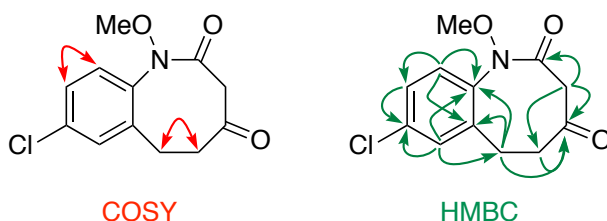

**8-Chloro-1-methoxy-5,6-dihydrobenzo[*b*]azocine-2,4(1*H*,3*H*)-dione (11b).** Isolated as a yellow solid (58.7 mg, 51%). **TLC:**  $R_f$  0.40 (95:5 CH<sub>2</sub>Cl<sub>2</sub>/MeOH). **IR** (ATR, ZnSe): 2937, 1715 (C=O st), 1679 (C=O st), 1482, 1418, 1343, 1269, 1185, 1095, 1072, 826, 737. **<sup>1</sup>H-NMR** (600 MHz):  $\delta$  7.46 – 7.44 (m, 1H), 7.42 – 7.39 (m, 2H), 3.82 (s, 3H), 3.37 (d, 1H,  $J = 11.8$  Hz), 3.25 (d, 1H,  $J = 11.7$  Hz), 3.14 – 3.07 (m, 1H), 2.95 – 2.86 (m, 2H), 2.60 – 2.51 (m, 1H). **<sup>13</sup>C-NMR** (151 MHz):  $\delta$  199.7, 162.0, 139.4, 137.0, 135.8, 130.4, 129.1, 127.8, 62.0, 50.8, 43.5, 27.2. **HRMS** (ESI)  $m/z$  calcd for C<sub>12</sub>H<sub>12</sub>ClNO<sub>3</sub>Na ([M+Na]<sup>+</sup>) 276.0403; found 276.0413.

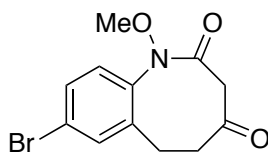

**8-Bromo-1-methoxy-5,6-dihydrobenzo[*b*]azocine-2,4(1*H*,3*H*)-dione (11c).** Isolated as a red solid (36.4 mg, 37%). **TLC:**  $R_f$  0.50 (95:5 CH<sub>2</sub>Cl<sub>2</sub>/MeOH). **IR** (ATR, ZnSe): 2937, 1716 (C=O st), 1680 (C=O st), 1480, 1342, 1271, 1183, 1039, 912, 821, 735. **<sup>1</sup>H-NMR** (600 MHz):  $\delta$  7.58 – 7.53 (m, 2H), 7.38 (d, 1H,  $J = 8.1$  Hz), 3.82 (s, 3H), 3.37 (d, 1H,  $J = 11.7$  Hz), 3.25 (d, 1H,  $J = 11.6$  Hz), 3.12 – 3.05 (m, 1H), 2.90 (t, 2H,  $J = 15.6$  Hz), 2.55 (t, 1H,  $J = 13.1$  Hz). **<sup>13</sup>C-NMR** (151 MHz):  $\delta$  199.6, 161.9, 139.6, 137.5, 133.4, 132.1, 127.9, 123.9, 62.0, 50.8, 43.6, 27.2. **HRMS** (ESI)  $m/z$  calcd for C<sub>12</sub>H<sub>12</sub>BrNO<sub>3</sub>Na ([M+Na]<sup>+</sup>) 319.9898; found 319.9908.

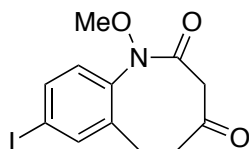

**8-Iodo-1-methoxy-5,6-dihydrobenzo[*b*]azocine-2,4(1*H*,3*H*)-dione (11d).** Isolated as a yellow solid (24.4 mg, 41%). **TLC:**  $R_f$  0.64 (95:5 CH<sub>2</sub>Cl<sub>2</sub>/MeOH). **IR** (ATR, ZnSe): 2933, 1715

(C=O st), 1679 (C=O st), 1480, 1341, 1271, 1076, 1039, 913, 735.  $^1\text{H-NMR}$  (600 MHz):  $\delta$  7.77 (d, 1H,  $J = 1.9$  Hz), 7.75 (dd, 1H,  $J = 8.3, 2.0$  Hz), 7.23 (d, 1H,  $J = 8.3$  Hz), 3.81 (s, 3H), 3.38 (d, 1H,  $J = 11.5$  Hz), 3.24 (d, 1H,  $J = 11.5$  Hz), 3.06 (t, 1H,  $J = 12.3$  Hz), 2.89 (t, 2H,  $J = 12.8$  Hz), 2.55 (t, 1H,  $J = 12.8$  Hz).  $^{13}\text{C-NMR}$  (151 MHz):  $\delta$  199.6, 161.9, 139.7, 139.4, 138.2, 138.0, 127.9, 95.6, 62.0, 50.8, 43.6, 27.0. **HRMS** (ESI)  $m/z$  calcd for  $\text{C}_{12}\text{H}_{12}\text{INO}_3\text{Na}$  ( $[\text{M}+\text{Na}]^+$ ) 367.9760; found 367.9770.

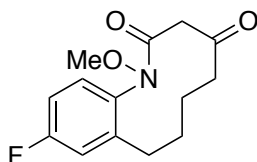

**10-Fluoro-1-methoxy-5,6,7,8-tetrahydrobenzo[*b*]azecine-2,4(1*H*,3*H*)-dione (13a).** Isolated as a yellow solid (89.0 mg, 90%). **TLC:**  $R_f$  0.59 (95:5  $\text{CH}_2\text{Cl}_2/\text{MeOH}$ ). **IR** (ATR, ZnSe): 2936, 1718 (C=O st), 1673 (C=O st), 1491, 1459, 1421, 1367, 1252, 1037, 915, 832, 734.  $^1\text{H-NMR}$  (600 MHz):  $\delta$  7.28 (dd, 1H,  $J = 8.6, 5.4$  Hz), 7.07 (d, 1H,  $J = 9.1$  Hz), 7.03 (t, 1H,  $J = 6.9$  Hz), 3.75 (s, 3H), 3.53 (d, 1H,  $J = 15.2$  Hz), 3.08 (d, 1H,  $J = 15.2$  Hz), 2.99 (t, 1H,  $J = 15.7$  Hz), 2.71 (d, 1H,  $J = 15.2$  Hz), 2.57 (dt, 1H,  $J = 12.9, 6.2$  Hz), 2.29 (ddd, 1H,  $J = 13.9, 8.6, 5.7$  Hz), 2.01 – 1.93 (m, 1H), 1.91 – 1.83 (m, 1H), 1.80 – 1.73 (m, 1H), 1.30 – 1.21 (m, 1H).  $^{13}\text{C-NMR}$  (151 MHz):  $\delta$  203.2, 163.8, 163.5 (d,  $J = 252.2$  Hz), 143.6 (d,  $J = 9.1$  Hz), 133.8 (d,  $J = 3.0$  Hz), 131.3 (d,  $J = 9.1$  Hz), 116.8 (d,  $J = 22.7$  Hz), 114.8 (d,  $J = 22.7$  Hz), 61.0, 47.5, 40.0, 27.9, 26.4, 20.9. **HRMS** (ESI)  $m/z$  calcd for  $\text{C}_{14}\text{H}_{16}\text{FNO}_3\text{Na}$  ( $[\text{M}+\text{Na}]^+$ ) 288.1012; found 288.1015.

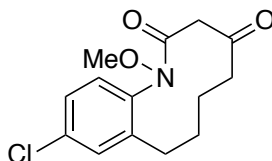

**10-Chloro-1-methoxy-5,6,7,8-tetrahydrobenzo[*b*]azecine-2,4(1*H*,3*H*)-dione (13b).** Isolated as a yellow oil (96.1 mg, 77%). **TLC:**  $R_f$  0.42 (95:5  $\text{CH}_2\text{Cl}_2/\text{MeOH}$ ). **IR** (ATR, ZnSe): 2935, 1718 (C=O st), 1674 (C=O st), 1480, 1361, 1115, 1092, 1039, 912, 830, 735.  $^1\text{H-NMR}$  (600 MHz):  $\delta$  7.37 (s, 1H), 7.31 (d, 1H,  $J = 8.3$  Hz), 7.23 (d, 1H,  $J = 8.4$  Hz), 3.74 (s, 3H), 3.54 (d, 1H,  $J = 15.2$  Hz), 3.07 (d, 1H,  $J = 15.2$  Hz), 2.97 (t, 1H,  $J = 16.0$  Hz), 2.70 (d, 1H,  $J = 15.1$  Hz), 2.56 (dt, 1H,  $J = 12.9, 6.1$  Hz), 2.30 (dt, 1H,  $J = 13.8, 7.1$  Hz), 1.99 (t, 1H,  $J = 11.9$  Hz), 1.87 (t, 1H,  $J = 11.7$  Hz), 1.80 – 1.74 (m, 1H), 1.29 – 1.21 (m, 1H).  $^{13}\text{C-NMR}$  (151 MHz):  $\delta$  203.3, 163.6, 142.6, 136.7, 136.4, 130.6, 130.3, 127.8, 61.1, 47.2, 40.3, 27.9, 26.2, 21.0. **HRMS** (ESI)  $m/z$  calcd for  $\text{C}_{14}\text{H}_{16}\text{ClNO}_3\text{Na}$  ( $[\text{M}+\text{Na}]^+$ ) 304.0716; found 304.0717.

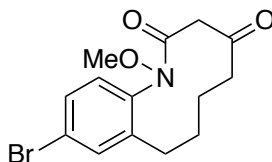

**10-Bromo-1-methoxy-5,6,7,8-tetrahydrobenzo[*b*]azecine-2,4(1*H*,3*H*)-dione (13c).** Isolated as a yellow oil (640 mg, 79%). **TLC:**  $R_f$  0.47 (95:5  $\text{CH}_2\text{Cl}_2/\text{MeOH}$ ). **IR** (ATR, ZnSe): 2934, 1719 (C=O st), 1673 (C=O st), 1479, 1358, 1083, 1038, 912, 832, 734.  $^1\text{H-NMR}$  (600 MHz):  $\delta$  7.53 (s, 1H), 7.47 (d, 1H,  $J = 7.5$  Hz), 7.16 (d, 1H,  $J = 8.3$  Hz), 3.74 (s, 3H), 3.54 (d, 1H,  $J = 15.2$  Hz), 3.07 (d, 1H,  $J = 15.2$  Hz), 2.97 (t, 1H,  $J = 13.9$  Hz), 2.71 (d, 1H,  $J = 15.0$  Hz), 2.56 (dt, 1H,

$J = 12.9, 6.1$  Hz), 2.31 (dt, 1H,  $J = 13.5, 7.9$  Hz), 1.98 (t, 1H,  $J = 11.4$  Hz), 1.87 (t, 1H,  $J = 11.9$  Hz), 1.81 – 1.75 (m, 1H), 1.30 – 1.22 (m, 1H).  $^{13}\text{C-NMR}$  (151 MHz):  $\delta$  203.2, 163.6, 142.9, 136.9, 133.4, 130.8, 130.8, 124.9, 61.2, 47.1, 40.3, 28.0, 26.2, 21.1. **HRMS** (ESI)  $m/z$  calcd for  $\text{C}_{14}\text{H}_{16}\text{BrNO}_3\text{Na}$  ( $[\text{M}+\text{Na}]^+$ ) 348.0211; found 348.0197.

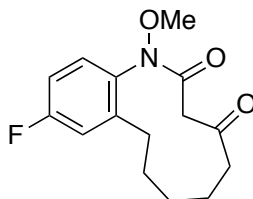

**11-Fluoro-1-methoxy-1,5,6,7,8,9-hexahydro-2H-benzo[b][1]azacycloundecine-2,4(3H)-dione (15a).** Isolated as a yellow oil (74.4 mg, 74%, mixture of rotamers (3:2 *E/Z*)). **TLC:**  $R_f$  0.38 (95:5  $\text{CH}_2\text{Cl}_2/\text{MeOH}$ ). **IR** (ATR, ZnSe): 2937, 1710 (C=O st), 1663 (C=O st), 1491, 1408, 1386, 1247, 1150, 966, 871, 826, 734.  $^1\text{H-NMR}$  (600 MHz, *E* rotamer):  $\delta$  7.22 (dd, 1H,  $J = 8.5, 5.4$  Hz), 7.03 (dd, 1H,  $J = 9.0, 2.7$  Hz), 7.01 – 6.95 (m, 1H), 4.03 (d, 1H,  $J = 15.0$  Hz), 3.69 (s, 3H), 3.37 (d, 1H,  $J = 15.0$  Hz), 2.94 (ddd, 1H,  $J = 12.7, 10.0, 2.9$  Hz), 2.78 (ddd, 1H,  $J = 13.5, 7.5, 3.8$  Hz), 2.38 (dt, 1H,  $J = 13.5, 8.6$  Hz), 2.33 – 2.22 (m, 1H), 1.92 – 1.71 (m, 3H), 1.48 – 1.36 (m, 3H).  $^{13}\text{C-NMR}$  (151 MHz, *E* rotamer):  $\delta$  204.6, 167.1, 163.0 (d,  $J = 249.2$  Hz), 144.9 (d,  $J = 7.5$  Hz), 132.5 (d,  $J = 9.1$  Hz), 130.2 (d,  $J = 3.0$  Hz), 118.3 (d,  $J = 22.6$  Hz), 113.3 (d,  $J = 22.6$  Hz), 62.0, 48.7, 38.0, 29.4, 27.1, 26.6, 19.9.  $^1\text{H-NMR}$  (600 MHz, *Z* rotamer):  $\delta$  7.14 (dd, 1H,  $J = 8.4, 5.3$  Hz), 7.08 (dd, 1H,  $J = 8.8, 1.9$  Hz), 7.01 – 6.95 (m, 1H), 3.76 (s, 3H), 3.31 (d, 1H,  $J = 16.5$  Hz), 3.22 (d, 1H,  $J = 16.5$  Hz), 3.11 (dt, 1H,  $J = 15.3, 8.7$  Hz), 3.02 – 2.97 (m, 1H), 2.64 (dt, 1H,  $J = 14.7, 4.3$  Hz), 2.33 – 2.22 (m, 1H), 1.92 – 1.71 (m, 4H), 1.48 – 1.36 (m, 1H), 0.91 – 0.80 (m, 1H).  $^{13}\text{C-NMR}$  (151 MHz, *Z* rotamer):  $\delta$  203.8, 163.5, 163.4 (d,  $J = 252.2$  Hz), 144.7 (d,  $J = 9.1$  Hz), 132.7 (d,  $J = 1.5$  Hz), 131.3 (d,  $J = 9.1$  Hz), 118.1 (d,  $J = 21.1$  Hz), 114.0 (d,  $J = 22.6$  Hz), 60.7, 48.9, 41.2, 28.4, 28.0, 24.1, 21.8. **HRMS** (ESI)  $m/z$  calcd for  $\text{C}_{15}\text{H}_{18}\text{FNO}_3\text{Na}$  ( $[\text{M}+\text{Na}]^+$ ) 302.1168; found 302.1173.

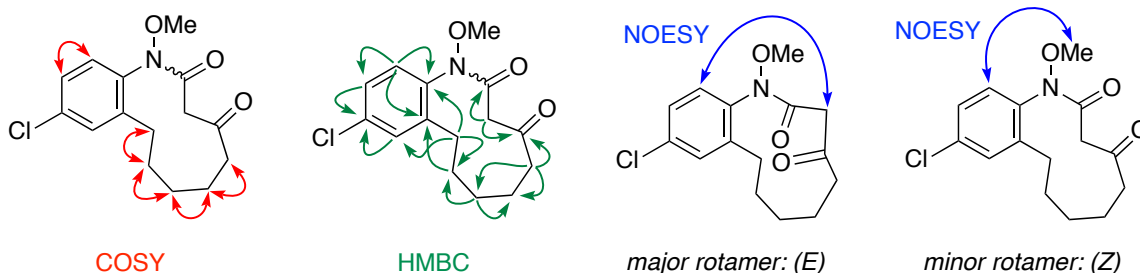

**11-Chloro-1-methoxy-1,5,6,7,8,9-hexahydro-2H-benzo[b][1]azacycloundecine-2,4(3H) dione (15b).** Isolated as a yellow oil (69.6 mg, 70%, mixture of rotamers (2:1 *E/Z*)). **TLC:**  $R_f$  0.50 (95:5  $\text{CH}_2\text{Cl}_2/\text{MeOH}$ ). **IR** (ATR, ZnSe): 2937, 1711 (C=O st), 1665 (C=O st), 1481, 1441, 1405, 1269, 1231, 1187, 981, 826, 738.  $^1\text{H-NMR}$  (600 MHz, *E* rotamer):  $\delta$  7.31 (d, 1H,  $J = 1.6$  Hz), 7.29 – 7.25 (m, 1H), 7.18 (d, 1H,  $J = 8.3$  Hz), 4.02 (d, 1H,  $J = 15.0$  Hz), 3.69 (s, 3H), 3.37 (d, 1H,  $J = 15.0$  Hz), 2.97 – 2.90 (m, 1H), 2.77 (ddd, 1H,  $J = 12.0, 7.3, 3.9$  Hz), 2.38 (dt, 1H,  $J = 13.5, 8.6$  Hz), 2.32 – 2.27 (m, 1H), 1.90 – 1.71 (m, 3H), 1.47 – 1.35 (m, 3H).  $^{13}\text{C-NMR}$  (151 MHz, *E* rotamer):  $\delta$  204.5, 167.0, 143.9, 135.6, 132.8, 131.9, 131.6, 126.6, 62.1, 48.7, 38.0, 29.2, 27.1, 26.6, 19.9.  $^1\text{H-NMR}$  (600 MHz, *Z* rotamer):  $\delta$  7.37 (s, 1H), 7.29 – 7.25 (m, 1H), 7.09 (d, 1H,  $J = 8.2$  Hz), 3.75 (s, 3H), 3.31 (d, 1H,  $J = 16.5$  Hz), 3.22 (d, 1H,  $J = 16.5$  Hz), 3.11 (dt, 1H,  $J = 15.9, 8.3$  Hz), 3.01 – 2.95 (m, 1H), 2.65 – 2.59 (m, 1H), 2.31 –



2.23 (m, 1H), 1.90 – 1.71 (m, 4H), 1.47 – 1.35 (m, 1H), 0.89 – 0.78 (m, 1H).  $^{13}\text{C-NMR}$  (151 MHz, *Z* rotamer):  $\delta$  203.7, 163.4, 143.7, 136.6, 135.1, 131.7, 130.7, 127.1, 60.9, 48.7, 41.2, 28.3, 27.9, 24.2, 21.8. **HRMS** (ESI) *m/z* calcd for  $\text{C}_{15}\text{H}_{18}\text{ClNO}_3\text{Na}$  ( $[\text{M}+\text{Na}]^+$ ) 318.0873; found 318.0863.

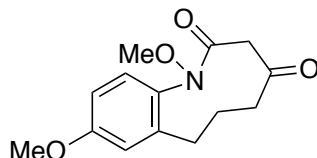

**1,9-Dimethoxy-1,5,6,7-tetrahydro-2H-benzo[b]azonine-2,4(3H)-dione (17).** The general procedure was modified using methanol as the solvent at 0 °C instead of nitromethane. Isolated as a white solid (85.5 mg, 86%). **TLC:**  $R_f$  0.60 (95:5  $\text{CH}_2\text{Cl}_2/\text{MeOH}$ ). **IR** (ATR, ZnSe): 2977, 2940, 1723 (C=O st), 1679 (C=O st), 1501, 1446, 1280, 1239, 1050, 1030, 920.  $^1\text{H-NMR}$  (600 MHz):  $\delta$  7.13 (d, 1H,  $J = 8.6$  Hz), 6.81 (dd, 1H,  $J = 8.6, 2.9$  Hz), 6.76 (d, 1H,  $J = 2.9$  Hz), 3.82 (s, 3H), 3.82 (s, 3H), 3.29 (d, 1H,  $J = 16.1$  Hz), 3.16 (d, 1H,  $J = 16.1$  Hz), 2.87 – 2.80 (m, 2H), 2.73 – 2.68 (m, 1H), 2.22 – 2.14 (m, 2H), 2.07 – 1.98 (m, 1H).  $^{13}\text{C-NMR}$  (151 MHz):  $\delta$  204.5, 164.4, 161.8, 144.3, 130.8, 128.6, 116.2, 113.5, 61.0, 55.5, 54.6, 39.9, 31.7, 31.1. **HRMS** (ESI) *m/z* calcd for  $\text{C}_{14}\text{H}_{17}\text{NO}_4\text{Na}$  ( $[\text{M}+\text{Na}]^+$ ) 286.1055; found 286.1051

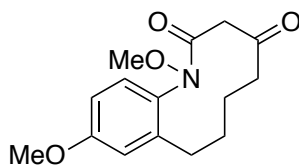

**1,10-Dimethoxy-5,6,7,8-tetrahydrobenzo[b]azecine-2,4(1H,3H)-dione (19).** The general procedure was modified using methanol as the solvent at 0 °C instead of nitromethane. Isolated as a yellow oil (780 mg, 87%). **TLC:**  $R_f$  0.55 (95:5  $\text{CH}_2\text{Cl}_2/\text{MeOH}$ ). **IR** (ATR, ZnSe): 2937, 1717 (C=O st), 1675 (C=O st), 1604, 1495, 1424, 1248, 1214, 1035, 842, 703.  $^1\text{H-NMR}$  (600 MHz):  $\delta$  7.19 (d, 1H,  $J = 8.5$  Hz), 6.86 (d, 1H,  $J = 2.3$  Hz), 6.84 (dd, 1H,  $J = 8.6, 2.6$  Hz), 3.85 (s, 3H), 3.73 (s, 3H), 3.58 (d, 1H,  $J = 15.1$  Hz), 3.06 (d, 1H,  $J = 15.1$  Hz), 2.97 (ddd, 1H,  $J = 14.9, 12.7, 4.7$  Hz), 2.69 (dt, 1H,  $J = 14.8, 3.9$  Hz), 2.59 (dt, 1H,  $J = 12.6, 6.0$  Hz), 2.26 (ddd, 1H,  $J = 14.2, 9.1, 6.1$  Hz), 2.00 – 1.92 (m, 1H), 1.83 (td, 1H,  $J = 13.9, 3.7$  Hz), 1.76 – 1.69 (m, 1H), 1.27 – 1.19 (m, 1H).  $^{13}\text{C-NMR}$  (151 MHz):  $\delta$  203.5, 164.0, 161.1, 142.4, 130.7, 130.2, 115.3, 112.6, 60.6, 55.5, 47.6, 39.6, 28.2, 26.3, 20.8. **HRMS** (ESI) *m/z* calcd for  $\text{C}_{15}\text{H}_{19}\text{NO}_4\text{Na}$  ( $[\text{M}+\text{Na}]^+$ ) 300.1212; found 300.1206.

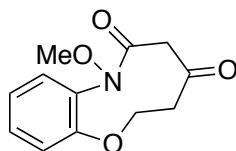

**7-Methoxy-2,3-dihydrobenzo[b][1,4]oxazonine-4,6(5H,7H)-dione (21a).** Isolated as a yellow oil (88.7 mg, 89%). **TLC:**  $R_f$  0.30 (95:5  $\text{CH}_2\text{Cl}_2/\text{MeOH}$ ). **IR** (ATR, ZnSe): 2936, 1718 (C=O st), 1678 (C=O st), 1491, 1346, 1237, 1118, 1034, 1015, 898, 767, 738.  $^1\text{H-NMR}$  (600 MHz):  $\delta$  7.48 (ddd, 1H,  $J = 8.1, 7.6, 1.7$  Hz), 7.42 (dd, 1H,  $J = 7.9, 1.6$  Hz), 7.25 – 7.20 (m, 2H), 4.64 (br s, 1H), 4.37 (br s, 1H), 3.83 (s, 3H), 3.29 (s, 2H), 3.18 (br s, 1H), 2.47 (br s, 1H).  $^{13}\text{C-NMR}$  (151 MHz):  $\delta$  202.2, 164.6, 155.8, 132.3, 131.2, 129.6, 125.0, 120.8, 72.8,

61.5, 51.8, 42.9. **HRMS** (ESI)  $m/z$  calcd for  $C_{12}H_{13}NO_4Na$  ( $[M+Na]^+$ ) 258.0742; found 258.0735.

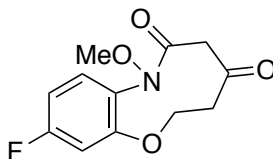

**10-Fluoro-7-methoxy-2,3-dihydrobenzo[b][1,4]oxazonine-4,6(5H,7H)-dione (21b).** Isolated as a yellow oil (85.0 mg, 86%). **TLC:**  $R_f$  0.30 (95:5  $CH_2Cl_2/MeOH$ ). **IR** (ATR, ZnSe): 2938, 1721 (C=O st), 1682 (C=O st), 1498, 1359, 1274, 1248, 1151, 1109, 1034, 1015, 739.  **$^1H$ -NMR** (600 MHz):  $\delta$  7.42 (dd, 1H,  $J = 8.7, 6.0$  Hz), 6.97 – 6.92 (m, 2H), 4.67 (br s, 1H), 4.35 (br s, 1H), 3.82 (s, 3H), 3.29 (s, 2H), 3.18 (br s, 1H), 2.48 (br s, 1H).  **$^{13}C$ -NMR** (151 MHz):  $\delta$  201.9, 164.6, 164.3 (d,  $J = 253.7$  Hz), 157.0 (d,  $J = 10.6$  Hz), 131.0 (d,  $J = 10.6$  Hz), 127.6 (d,  $J = 4.5$  Hz), 112.5 (d,  $J = 22.7$  Hz), 108.6 (d,  $J = 24.2$  Hz), 73.3, 61.5, 52.0, 42.7. **HRMS** (ESI)  $m/z$  calcd for  $C_{12}H_{12}FNO_4Na$  ( $[M+Na]^+$ ) 276.0648; found 276.0643.

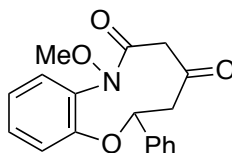

**7-Methoxy-2-phenyl-2,3-dihydrobenzo[b][1,4]oxazonine-4,6(5H,7H)-dione (23).** Isolated as a yellow oil (81.6 mg, 82%). **TLC:**  $R_f$  0.41 (95:5  $CH_2Cl_2/MeOH$ ). **IR** (ATR, ZnSe): 2932, 1713 (C=O st), 1684 (C=O st), 1489, 1354, 1259, 1216, 1160, 1121, 1032, 911, 812, 756, 737.  **$^1H$ -NMR** (600 MHz):  $\delta$  7.48 – 7.36 (m, 7H), 7.23 (td, 1H,  $J = 7.7, 1.2$  Hz), 7.09 (d, 1H,  $J = 8.2$  Hz), 5.31 (d, 1H,  $J = 11.6$  Hz), 3.92 (s, 3H), 3.46 (dd, 1H,  $J = 14.4, 11.1$  Hz), 3.38 (s, 2H), 2.61 (dd, 1H,  $J = 14.4, 1.9$  Hz).  **$^{13}C$ -NMR** (151 MHz):  $\delta$  201.2, 165.3, 155.6, 139.7, 132.3, 131.2, 129.3, 128.9, 128.6, 125.4, 125.2, 120.7, 86.1, 61.7, 51.9, 50.4. **HRMS** (ESI)  $m/z$  calcd for  $C_{18}H_{17}NO_4Na$  ( $[M+Na]^+$ ) 334.1055; found 334.1055.

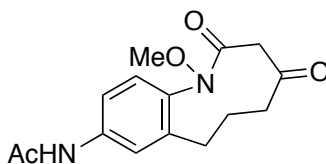

***N*-(1-Methoxy-2,4-dioxo-2,3,4,5,6,7-hexahydro-1H-benzo[b]azonin-9-yl)acetamide (25).** Isolated as a light yellow oil (11.0 mg, 57%). **TLC:**  $R_f$  0.28 (95:5 EtOAc/MeOH). **IR** (NaCl, film): 2935, 1710 (C=O st), 1671 (C=O st), 1543, 1499, 729.  **$^1H$ -NMR** (600 MHz): 7.52 (dd, 1H,  $J = 8.4, 2.5$  Hz), 7.47 (d, 1H,  $J = 2.5$  Hz), 7.32 (s, 1H), 7.16 (d, 1H,  $J = 8.5$  Hz), 3.83 (s, 3H), 3.30 (d, 1H,  $J = 16.1$  Hz), 3.15 (d, 1H,  $J = 16.0$ ), 2.84 (td, 2H,  $J = 13.2, 2.4$  Hz), 2.76 – 2.67 (m, 1H), 2.27 – 2.12 (m, 5H), 2.08 – 1.95 (m, 1H).  **$^{13}C$ -NMR** (151 MHz):  $\delta$  204.8, 168.3, 164.2, 143.9, 140.8, 131.5, 130.4, 121.5, 118.7, 61.2, 54.6, 39.9, 31.5, 31.1, 24.8. **HRMS** (ESI)  $m/z$  calcd for  $C_{15}H_{18}N_2O_4Na$  ( $[M+Na]^+$ ) 313.1164; found 313.1157.

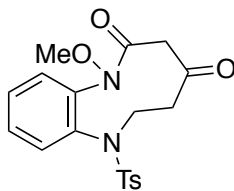

**1-Methoxy-7-tosyl-1,5,6,7-tetrahydro-2H-benzo[b][1,4]diazonine-2,4(3H)-dione (27).**

Isolated as a yellow oil (8.7 mg, 88%). **TLC:**  $R_f$  0.38 (95:5 CH<sub>2</sub>Cl<sub>2</sub>/MeOH). **IR** (ATR, ZnSe): 2934, 2359, 2341, 1719 (C=O st), 1681 (C=O st), 1492, 1356, 1164, 912, 771, 734. **<sup>1</sup>H-NMR** (600 MHz):  $\delta$  7.88 (d, 2H,  $J$  = 8.2 Hz), 7.55 – 7.47 (m, 3H), 7.38 (d, 2H,  $J$  = 8.1 Hz), 7.22 (dd, 1H,  $J$  = 7.5, 1.7 Hz), 4.05 (d, 1H,  $J$  = 13.6 Hz), 4.01 (s, 3H), 3.46 (t, 1H,  $J$  = 11.9 Hz), 3.30 (d, 1H,  $J$  = 15.8 Hz), 3.16 (d, 1H,  $J$  = 15.8 Hz), 3.01 (t, 1H,  $J$  = 10.9 Hz), 2.47 (s, 3H), 2.20 (dd, 1H,  $J$  = 13.3, 4.0 Hz). **<sup>13</sup>C-NMR** (151 MHz):  $\delta$  202.1, 163.5, 144.6, 139.0, 138.5, 135.1, 132.5, 130.9, 130.6, 130.2, 129.9, 128.7, 62.6, 53.2, 51.6, 41.3, 21.7. **HRMS** (ESI)  $m/z$  calcd for C<sub>19</sub>H<sub>22</sub>N<sub>2</sub>O<sub>5</sub>SNa ([M+Na]<sup>+</sup>) 413.1147; found 413.1133.

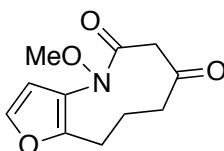

**4-Methoxy-4,8,9,10-tetrahydro-5H-furo[3,2-b]azonine-5,7(6H)-dione (30).** Isolated as a light yellow oil (22.6 mg, 57%). **TLC:**  $R_f$  0.31 (1:3 hexanes/EtOAc). **IR** (NaCl, film): 2937, 1682 (C=O st), 1438, 1358, 1130, 1038. **<sup>1</sup>H-NMR** (400 MHz):  $\delta$  7.39 (d, 1H,  $J$  = 2.1 Hz), 6.31 (d, 1H,  $J$  = 2.0 Hz), 3.83 (s, 3H), 3.42 – 3.14 (m, 2H), 2.83 – 2.70 (m, 2H), 2.35 – 2.01 (m, 4H). **<sup>13</sup>C-NMR** (151 MHz):  $\delta$  202.1, 164.7, 155.5, 142.8, 120.9, 109.5, 61.6, 54.2, 39.8, 28.4, 26.0. **HRMS** (ESI)  $m/z$  calcd for C<sub>11</sub>H<sub>13</sub>NO<sub>4</sub>Na ([M+Na]<sup>+</sup>) 246.0742; found 246.0740.

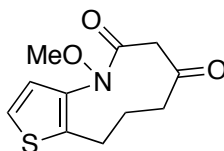

**4-Methoxy-4,8,9,10-tetrahydro-5H-thieno[3,2-b]azonine-5,7(6H)-dione (31).** Isolated as a yellow oil (19.8 mg, 61%). **TLC:**  $R_f$  0.16 (1:1 hexanes/EtOAc). **IR** (NaCl, film): 2933, 1711 (C=O st), 1678 (C=O st), 1441, 1402, 1349, 1042. **<sup>1</sup>H-NMR** (600 MHz):  $\delta$  7.29 – 7.26 (m, 1H), 6.85 (d, 1H,  $J$  = 5.3 Hz), 3.85 (s, 3H), 3.34 (d, 1H,  $J$  = 16.1 Hz), 3.17 (d, 1H,  $J$  = 16.1 Hz), 3.06 – 2.87 (m, 3H), 2.83 – 2.70 (m, 1H), 2.23 (dt, 1H,  $J$  = 13.5, 4.6 Hz), 2.20 – 2.10 (m, 2H). **<sup>13</sup>C-NMR** (151 MHz):  $\delta$  203.0, 164.6, 146.4, 132.8, 125.7, 125.2, 61.7, 54.3, 39.7, 31.9, 27.4. **HRMS** (ESI)  $m/z$  calcd for C<sub>11</sub>H<sub>13</sub>NO<sub>3</sub>Na ([M+Na]<sup>+</sup>) 262.0514; found 262.0525.

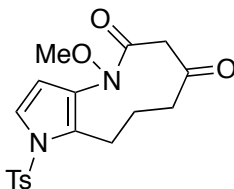

**4-Methoxy-1-tosyl-4,8,9,10-tetrahydropyrrolo[3,2-b]azonine-5,7(1H,6H)-dione (33).**

Isolated as a light yellow oil (15.0 mg, 55%). **TLC:**  $R_f$  0.15 (1:1 hexanes/EtOAc). **IR** (NaCl,

film): 2934, 1712 (C=O st), 1681 (C=O st), 1370, 1177, 1125, 702. **<sup>1</sup>H-NMR** (600 MHz):  $\delta$  7.76 (d, 2H,  $J$  = 8.2 Hz), 7.38 (d, 2H,  $J$  = 8.0 Hz), 7.34 (d, 1H,  $J$  = 3.6 Hz), 6.19 (d, 1H,  $J$  = 3.6 Hz), 3.76 (s, 3H), 3.29 (d, 1H,  $J$  = 16.3 Hz), 3.11 (d, 1H,  $J$  = 16.2 Hz), 2.65 (t, 2H,  $J$  = 13.8 Hz), 2.50 – 2.39 (m, 3H), 2.13 – 1.99 (m, 2H), 1.96 – 1.86 (m, 1H). **<sup>13</sup>C-NMR** (151 MHz):  $\delta$  202.9, 164.8, 146.0, 135.3, 130.3, 127.4, 124.1, 122.5, 109.9, 61.5, 54.2, 39.6, 29.1, 24.6, 21.8. **HRMS** (ESI)  $m/z$  calcd for C<sub>18</sub>H<sub>21</sub>N<sub>2</sub>O<sub>5</sub>S ([M+H]<sup>+</sup>) 377.1171; found 377.1187.

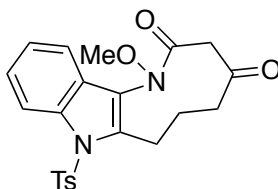

**1-Methoxy-8-tosyl-5,6,7,8-tetrahydroazonino[3,2-*b*]indole-2,4(1*H*,3*H*)-dione (35).** Isolated as a light yellow oil (25.6 mg, 68%). **TLC:**  $R_f$  0.25 (1:1 hexanes/EtOAc). **IR** (NaCl, film): 2935, 1714 (C=O st), 1686 (C=O st), 1450, 1374, 1175, 1039, 660. **<sup>1</sup>H-NMR** (600 MHz):  $\delta$  8.08 (d, 1H,  $J$  = 8.4 Hz), 7.78 (d, 2H,  $J$  = 8.4 Hz), 7.41 (d, 1H,  $J$  = 8.0 Hz), 7.36 (t, 1H,  $J$  = 7.1 Hz), 7.32 – 7.29 (m, 3H), 3.84 (s, 3H), 3.60 – 3.53 (m, 1H), 3.31 (d, 1H,  $J$  = 16.2 Hz), 3.00 (d, 1H,  $J$  = 16.2 Hz), 2.98 – 2.90 (m, 1H), 2.82 – 2.72 (m, 1H), 2.52 (q, 1H,  $J$  = 12.9 Hz), 2.39 (s, 3H), 2.28 – 2.12 (m, 2H). **<sup>13</sup>C-NMR** (151 MHz):  $\delta$  202.9, 165.3, 145.7, 142.3, 135.6, 135.2, 130.1, 126.8, 125.9, 125.1, 124.7, 119.8, 117.3, 115.1, 62.5, 53.4, 40.0, 29.8, 26.0, 21.7. **HRMS** (ESI)  $m/z$  calcd for C<sub>22</sub>H<sub>22</sub>N<sub>2</sub>O<sub>5</sub>SNa ([M+Na]<sup>+</sup>) 449.1147; found 449.1156.

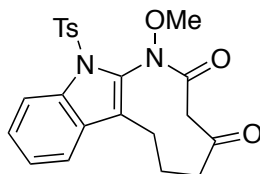

**1-Methoxy-12-tosyl-5,6,7,12-tetrahydroazonino[2,3-*b*]indole-2,4(1*H*,3*H*)-dione (37).** Isolated as a yellow oil (25.3 mg, 67%). **TLC:**  $R_f$  0.23 (4:1 benzene/EtOAc). **IR** (ATR, ZnSe): 2923, 1721 (C=O st), 1697 (C=O st), 1368, 1170, 1140, 748. **<sup>1</sup>H-NMR** (600 MHz):  $\delta$  8.20 (d, 1H,  $J$  = 8.5 Hz), 7.95 (d, 2H,  $J$  = 8.1 Hz), 7.54 (d, 1H,  $J$  = 7.9 Hz), 7.51 (t, 1H,  $J$  = 7.9 Hz), 7.33 (t, 1H,  $J$  = 7.6 Hz), 7.21 (d, 2H,  $J$  = 8.1 Hz), 3.81 (s, 3H), 3.53 (d, 1H,  $J$  = 16.4 Hz), 3.46 (d, 1H,  $J$  = 16.4 Hz), 3.01 (dt, 1H,  $J$  = 14.2, 3.4 Hz), 2.75 (td, 1H,  $J$  = 13.7, 3.5 Hz), 2.66 (t, 1H,  $J$  = 11.9 Hz), 2.35 (s, 3H), 2.34 – 2.21 (m, 2H), 2.23 – 2.14 (m, 1H). **<sup>13</sup>C-NMR** (151 MHz):  $\delta$  202.1, 165.7, 145.2, 135.5, 135.3, 129.5, 128.0, 127.7, 127.4, 126.6, 125.5, 123.8, 120.2, 114.8, 61.7, 53.7, 40.5, 29.2, 24.2, 21.6. **HRMS** (ESI)  $m/z$  calcd for C<sub>22</sub>H<sub>23</sub>N<sub>2</sub>O<sub>5</sub>S ([M+H]<sup>+</sup>) 427.1328; found 427.1334.

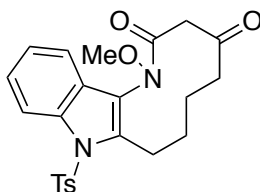

**1-Methoxy-9-tosyl-1,5,6,7,8,9-hexahydro-2*H*-azecino[3,2-*b*]indole-2,4(3*H*)-dione (39).** Isolated as a light yellow oil (46.3 mg, 66%). **TLC:**  $R_f$  0.25 (1:1 hexanes/EtOAc). **IR** (NaCl, film): 2933, 1721 (C=O st), 1688 (C=O st), 1452, 1373, 1174, 1031, 733, 659. **<sup>1</sup>H-NMR**

(600 MHz):  $\delta$  8.19 (d, 1H,  $J = 8.4$  Hz), 7.59 (d, 2H,  $J = 8.0$  Hz), 7.43 – 7.34 (m, 2H), 7.35 – 7.28 (m, 1H), 7.20 (d, 2H,  $J = 8.1$  Hz), 3.62 (s, 3H), 3.52 (d, 1H,  $J = 15.4$  Hz), 3.32 (dt, 1H,  $J = 15.3, 4.6$  Hz), 3.12 (ddd, 1H,  $J = 15.6, 11.6, 5.0$  Hz), 3.06 (d, 1H,  $J = 15.4$  Hz), 2.58 (ddd, 1H,  $J = 13.8, 8.8, 5.5$  Hz), 2.54 – 2.42 (m, 1H), 2.40 – 2.31 (m, 4H), 1.92 (td, 1H,  $J = 12.0, 11.2, 4.8$  Hz), 1.78 (dq, 1H,  $J = 12.6, 6.6, 5.2$  Hz), 1.25 (dd, 1H,  $J = 16.1, 9.3$  Hz).  $^{13}\text{C-NMR}$  (151 MHz):  $\delta$  203.7, 164.7, 145.6, 141.2, 136.0, 134.6, 130.0, 129.9, 126.4, 126.0, 125.2, 122.6, 117.6, 115.9, 61.3, 47.1, 41.4, 27.6, 23.3, 21.9, 21.6. **HRMS** (ESI)  $m/z$  calcd for  $\text{C}_{22}\text{H}_{25}\text{N}_2\text{O}_5\text{S}$  ( $[\text{M}+\text{H}]^+$ ) 441.1484; found 441.1484.

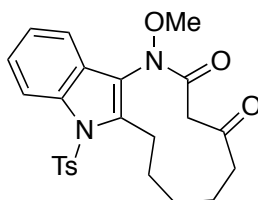

**1-Methoxy-10-tosyl-5,6,7,8,9,10-hexahydro-[1]azacycloundecino[3,2-*b*]indole-2,4(1H,3H)dione (41).** Isolated as a light yellow oil (53.7 mg, 60%). **TLC:**  $R_f$  0.30 (1:1 hexanes/EtOAc). **IR** (NaCl, film): 2936, 1712 (C=O st), 1677 (C=O st), 1450, 1373, 1174, 1089, 729.  $^1\text{H-NMR}$  (600 MHz):  $\delta$  8.21 (d, 1H,  $J = 8.5$  Hz), 7.64 (d, 2H,  $J = 8.0$  Hz), 7.38 (t, 1H,  $J = 7.9$  Hz), 7.34 (t, 1H,  $J = 7.5$  Hz), 7.31 – 7.18 (m, 3H), 3.68 (s, 3H), 3.43 – 3.33 (m, 1H), 3.32 – 3.21 (m, 2H), 3.17 (d, 1H,  $J = 16.6$  Hz), 2.88 (dt, 1H,  $J = 15.5, 5.0$  Hz), 2.37 (s, 3H), 2.35 – 2.24 (m, 1H), 2.25 – 2.16 (m, 1H), 2.04 – 1.94 (m, 1H), 1.85 – 1.76 (m, 1H), 1.52 – 1.29 (m, 2H), 0.88 (q, 1H,  $J = 12.9$  Hz).  $^{13}\text{C-NMR}$  (151 MHz):  $\delta$  203.8, 164.4, 145.5, 140.6, 135.2, 135.1, 130.1, 126.7, 126.4, 125.6, 125.1, 121.4, 116.5, 115.7, 61.9, 47.1, 42.4, 27.0, 25.7, 23.9, 22.0, 21.6. **HRMS** (ESI)  $m/z$  calcd for  $\text{C}_{24}\text{H}_{27}\text{N}_2\text{O}_5\text{S}$  ( $[\text{M}+\text{H}]^+$ ) 455.1641; found 455.1638.

---

## G. DOWNSTREAM MODIFICATIONS OF ODRE SCAFFOLDS

### 1. $\alpha$ -GEMINAL DIMETHYLATION OF $\beta$ -KETOLACTAM 13C

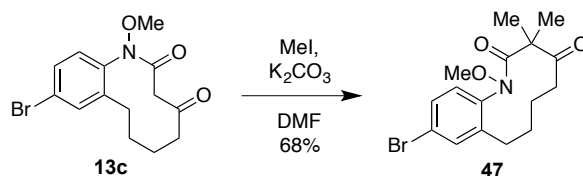

Supplementary Figure 17.  $\alpha$ -Geminal dimethylation of  $\beta$ -ketolactam 13c to form lactam 47.

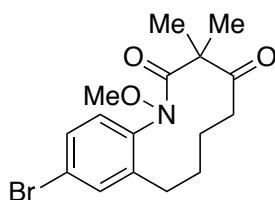

**10-Bromo-1-methoxy-3,3-dimethyl-5,6,7,8-tetrahydrobenzo[*b*]azecine-2,4(1*H*,3*H*)-dione (47).**  $\beta$ -Ketolactam **13c** (20.0 mg, 61.3  $\mu$ mol, 1.00 equiv) was dissolved in DMF (1.0 mL) at 24  $^{\circ}$ C. Potassium carbonate (34.0 mg, 245  $\mu$ mol, 4.00 equiv) was added followed by methyl iodide (35.0 mg, 245  $\mu$ mol, 4.00 equiv). The reaction was stirred at 24  $^{\circ}$ C for 48 h and monitored by TLC. The mixture was then filtered through a pad of Celite. The filtrate was diluted with EtOAc and washed with H<sub>2</sub>O (4  $\times$  10 mL) and brine. The organic layer was dried (Na<sub>2</sub>SO<sub>4</sub>), filtered, and concentrated by rotary evaporation to afford the crude product. Purification by silica flash chromatography (0%  $\rightarrow$  50% EtOAc in hexanes) yielded  $\alpha,\alpha$ -dimethyl lactam **47** as a colorless oil (15 mg, 68%).

**TLC:**  $R_f$  0.55 (95:5 CH<sub>2</sub>Cl<sub>2</sub>/MeOH). **IR** (ATR, ZnSe): 2973, 2935, 1715 (C=O st), 1666 (C=O st), 1477, 1020, 910, 734. **<sup>1</sup>H-NMR** (600 MHz):  $\delta$  7.45 (d, 1H,  $J$  = 2.1 Hz), 7.39 (dd, 1H,  $J$  = 8.3, 2.2 Hz), 7.11 (d, 1H,  $J$  = 8.3 Hz), 3.69 (s, 3H), 2.75 (t, 1H,  $J$  = 13.6 Hz), 2.62 (dd, 1H,  $J$  = 15.3, 5.7 Hz), 2.56 (d, 1H,  $J$  = 10.7 Hz), 2.19 (br s, 1H), 1.94 (br s, 1H), 1.82 – 1.71 (m, 2H), 1.70 – 1.62 (m, 1H), 1.42 (s, 3H), 1.30 (s, 3H). **<sup>13</sup>C-NMR** (151 MHz):  $\delta$  207.4, 170.7, 143.3, 135.4, 133.4, 131.9, 129.8, 125.6, 60.5, 56.5, 34.8, 25.3, 25.0, 23.2, 18.9. **HRMS** (ESI)  $m/z$  calcd for C<sub>16</sub>H<sub>20</sub>BrNO<sub>3</sub>Na ([M+Na]<sup>+</sup>) 376.0524; found 376.0542.

### 2. SONOGASHIRA COUPLING OF BROMO $\beta$ -KETOLACTAM 47

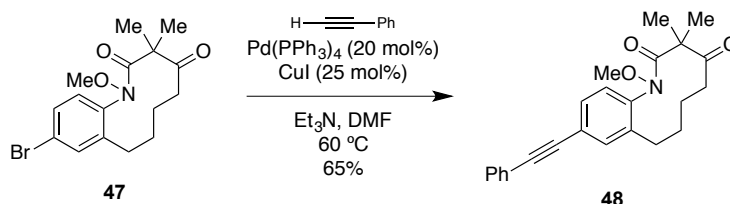

Supplementary Figure 18. Sonogashira coupling of bromo  $\beta$ -ketolactam 47 to form lactam 48.

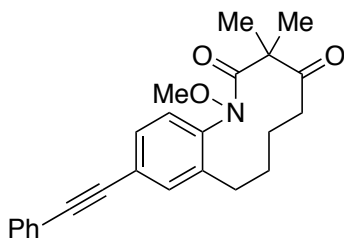

**1-Methoxy-3,3-dimethyl-10-(phenylethynyl)-5,6,7,8-tetrahydrobenzo[*b*]azecine-2,4(1*H*,3*H*)-dione (48).** To a vial containing bromo  $\beta$ -ketolactam **47** (8.00 mg, 22.5  $\mu$ mol, 1.00 equiv) was added tetrakis(triphenylphosphine palladium(0)) (5.3 mg, 4.4  $\mu$ mol, 0.20 equiv) and copper (I) iodide (1.0 mg, 5.6  $\mu$ mol, 0.25 equiv). The vial was then flushed with argon. Phenylacetylene (25.0  $\mu$ L, 0.225 mmol, 10.0 equiv), triethylamine (1.0 mL) and DMF (0.1 mL) were then added at 24  $^{\circ}$ C. The reaction was heated at 60  $^{\circ}$ C for 16 h. The mixture was then allowed to cool, diluted with  $\text{CH}_2\text{Cl}_2$  and then washed with  $\text{H}_2\text{O}$  (4  $\times$  5 mL) and brine. The organic layer was dried ( $\text{Na}_2\text{SO}_4$ ), filtered, and concentrated by rotary evaporation to afford the crude product. Purification by silica flash chromatography (0%  $\rightarrow$  30% EtOAc in hexanes) yielded lactam **48** as a white solid (5.5 mg, 65%).

**TLC:**  $R_f$  0.64 (95:5  $\text{CH}_2\text{Cl}_2/\text{MeOH}$ ). **IR** (ATR, ZnSe): 2934, 2250, 1713 (C=O st), 1667 (C=O st), 1497, 1020, 912, 735.  **$^1\text{H-NMR}$**  (600 MHz):  $\delta$  7.54 (dd, 2H,  $J$  = 6.6, 3.0 Hz), 7.46 (s, 1H), 7.41 (dd, 1H,  $J$  = 8.1, 1.7 Hz), 7.39 – 7.36 (m, 3H), 7.23 (d, 1H,  $J$  = 8.1 Hz), 3.74 (s, 3H), 2.78 (t, 1H,  $J$  = 13.6 Hz), 2.64 (dd, 1H,  $J$  = 15.5, 5.5 Hz), 2.58 (d, 1H,  $J$  = 10.7 Hz), 2.17 (br s, 1H), 2.00 (br s, 1H), 1.83 – 1.65 (m, 3H), 1.43 (s, 3H), 1.32 (s, 3H).  **$^{13}\text{C-NMR}$**  (151 MHz):  $\delta$  207.4, 170.7, 141.2, 135.8, 133.3, 131.7 (2C), 130.6, 129.6, 128.7, 128.4 (2C), 126.4, 122.7, 91.5, 88.3, 60.5, 56.5, 34.8, 25.3, 24.8, 23.3, 18.8. **HRMS** (ESI)  $m/z$  calcd for  $\text{C}_{24}\text{H}_{25}\text{NO}_3\text{Na}$  ( $[\text{M}+\text{Na}]^+$ ) 398.1716; found 398.1732.

### 3. SUZUKI-MIYAJURA COUPLING OF BROMO $\beta$ -KETOLACTAM **13c**

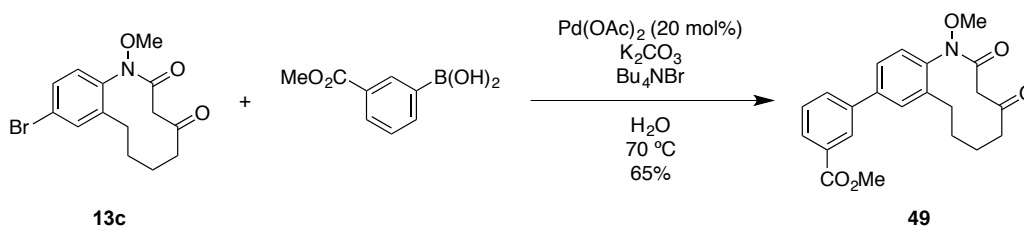

**Supplementary Figure 19. Suzuki-Miyajura coupling of bromo  $\beta$ -ketolactam **13c** to form  $\beta$ -ketolactam **49**.**

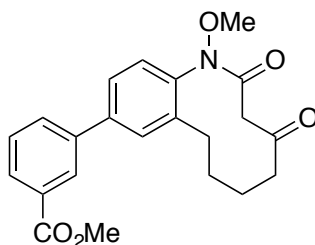

**Methyl 3-(1-methoxy-2,4-dioxo-1,2,3,4,5,6,7,8-octahydrobenzo[*b*]azecin-10-yl)benzoate (49).** To a vial containing bromo  $\beta$ -ketolactam **13c** (13.0 mg, 40.0  $\mu$ mol, 1.00 equiv) was added

3-methoxycarbonylphenylboronic acid (7.50 mg, 44.0  $\mu\text{mol}$ , 1.10 equiv), potassium carbonate (13.8 mg, 100  $\mu\text{mol}$ , 2.50 equiv) and tetra-*N*-butylammonium bromide (12.8 mg, 40.0  $\mu\text{mol}$ , 1.10 equiv). The vial was then flushed with argon. Water (1.0 mL) was added and the resulting suspension was heated at 70  $^{\circ}\text{C}$  for 2 h. The mixture was then allowed to cool, diluted with water and then extracted with EtOAc (4  $\times$  10 mL). The combined organic extracts were washed with brine, dried ( $\text{Na}_2\text{SO}_4$ ), filtered, and concentrated by rotary evaporation to afford the crude product. Purification by silica flash chromatography (0%  $\rightarrow$  20% EtOAc in hexanes) yielded biaryl lactam **49** as a colorless oil (10 mg, 65%).

**TLC:**  $R_f$  0.53 (95:5  $\text{CH}_2\text{Cl}_2/\text{MeOH}$ ). **IR** (ATR, ZnSe): 2935, 1720 (C=O st), 1673 (C=O st), 1250, 913, 736.  **$^1\text{H-NMR}$**  (600 MHz):  $\delta$  8.29 (s, 1H), 8.08 (d, 1H,  $J = 7.7$  Hz), 7.80 (d, 1H,  $J = 7.6$  Hz), 7.61 (s, 1H), 7.57 (t, 2H,  $J = 7.9$  Hz), 7.37 (d, 1H,  $J = 8.1$  Hz), 3.97 (s, 3H), 3.79 (s, 3H), 3.64 (d, 1H,  $J = 15.2$  Hz), 3.13 – 3.04 (m, 2H), 2.84 – 2.79 (m, 1H), 2.61 (dt, 1H,  $J = 12.8, 6.1$  Hz), 2.31 (dt, 1H,  $J = 13.9, 7.3$  Hz), 2.07 (t, 1H,  $J = 12.0$  Hz), 1.90 (t, 1H,  $J = 12.0$  Hz), 1.80 – 1.72 (m, 1H), 1.31 – 1.22 (m, 1H).  **$^{13}\text{C-NMR}$**  (151 MHz):  $\delta$  203.5, 166.8, 163.7, 142.6, 141.3, 139.9, 137.2, 131.6, 130.9, 129.9, 129.2, 129.1, 129.0, 128.3, 126.2, 61.1, 52.4, 47.3, 40.1, 28.2, 26.4, 21.1. **HRMS** (ESI)  $m/z$  calcd for  $\text{C}_{22}\text{H}_{23}\text{NO}_5\text{Na}$  ( $[\text{M}+\text{Na}]^+$ ) 404.1474; found 404.1490.

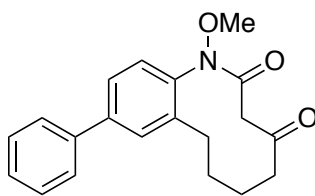

**1-Methoxy-10-phenyl-5,6,7,8-tetrahydrobenzo[*b*]azecine-2,4(1*H*,3*H*)-dione (50).** Isolated as a colorless oil (9.7 mg, 75%). **TLC:**  $R_f$  0.50 (95:5  $\text{CH}_2\text{Cl}_2/\text{MeOH}$ ). **IR** (ATR, ZnSe): 2934, 1718 (C=O st), 1672 (C=O st), 1484, 1366, 912, 735.  **$^1\text{H-NMR}$**  (600 MHz):  $\delta$  7.62 – 7.57 (m, 3H), 7.54 (d, 1H,  $J = 8.1$  Hz), 7.49 (t, 2H,  $J = 7.5$  Hz), 7.42 (t, 1H,  $J = 7.3$  Hz), 7.35 (d, 1H,  $J = 8.1$  Hz), 3.79 (s, 3H), 3.65 (d, 1H,  $J = 15.2$  Hz), 3.12 – 3.03 (m, 2H), 2.80 (dt, 1H,  $J = 15.0, 4.4$  Hz), 2.60 (dt, 1H,  $J = 12.8, 6.1$  Hz), 2.34 – 2.27 (m, 1H), 2.10 – 2.02 (m, 1H), 1.89 (dd, 1H,  $J = 14.0, 2.7$  Hz), 1.78 – 1.71 (m, 1H), 1.29 – 1.22 (m, 1H).  **$^{13}\text{C-NMR}$**  (151 MHz):  $\delta$  203.6, 163.8, 143.7, 141.0, 139.6, 136.8, 129.7, 129.0 (3C), 128.2 (2C), 127.2, 126.2, 61.1, 47.2, 40.1, 28.3, 26.3, 21.1. **HRMS** (ESI)  $m/z$  calcd for  $\text{C}_{20}\text{H}_{21}\text{NO}_3\text{Na}$  ( $[\text{M}+\text{Na}]^+$ ) 346.1419; found 346.1426.

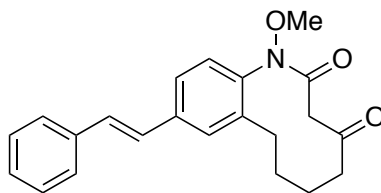

**(*E*)-1-methoxy-10-styryl-5,6,7,8-tetrahydrobenzo[*b*]azecine-2,4(1*H*,3*H*)-dione (51).** Isolated as a colorless oil (10.8 mg, 77%). **TLC:**  $R_f$  0.50 (95:5  $\text{CH}_2\text{Cl}_2/\text{MeOH}$ ). **IR** (ATR, ZnSe): 2933, 1717 (C=O st), 1761 (C=O st), 1497, 1366, 912, 733.  **$^1\text{H-NMR}$**  (600 MHz):  $\delta$  7.54 (d, 2H,  $J = 7.6$  Hz), 7.50 – 7.46 (m, 2H), 7.39 (t, 2H,  $J = 7.6$  Hz), 7.31 (t, 1H,  $J = 7.3$  Hz), 7.26 (d, 1H,  $J = 7.4$  Hz), 7.18 (d, 1H,  $J = 16.3$  Hz), 7.10 (d, 1H,  $J = 16.3$  Hz), 3.77 (s, 3H), 3.62 (d, 1H,  $J = 15.1$  Hz), 3.08 (d, 1H,  $J = 15.1$  Hz), 3.02 (td, 1H,  $J = 15.1, 4.5$  Hz), 2.75 (dt, 1H,  $J = 15.1, 4.5$  Hz), 2.59 (dt, 1H,  $J = 12.9, 6.2$  Hz), 2.29 (ddd, 1H,  $J = 14.1, 8.9, 5.9$  Hz), 2.10 – 2.01 (m,





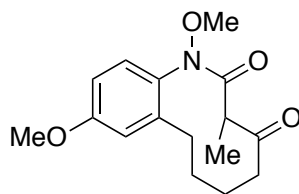

**1,10-Dimethoxy-3-methyl-5,6,7,8-tetrahydrobenzo[*b*]azecine-2,4(1*H*,3*H*)-dione (53).**

Methoxyaryl lactam **19** (0.20 g, 0.72 mmol, 1.0 equiv) was dissolved in THF (6.5 mL) and cooled to 0 °C. A solution of KO*t*-Bu (1.0 M in THF, 0.75 mL, 0.75 mmol, 1.05 equiv) was added by syringe over 5 min and the reaction was stirred for 1 h. Methyl iodide (135 μL, 2.16 mmol, 3.00 equiv) was then added and the reaction was stirred for an additional 3 h at 24 °C. The reaction was quenched slowly with satd aq NH<sub>4</sub>Cl at 0 °C, warmed to 24 °C and diluted with CH<sub>2</sub>Cl<sub>2</sub>. The mixture was extracted with CH<sub>2</sub>Cl<sub>2</sub> (3 × 20 mL). The combined organic extracts were washed with brine, dried (Na<sub>2</sub>SO<sub>4</sub>), filtered, and concentrated by rotary evaporation to afford the crude product. Purification by silica flash chromatography (0% → 10% MeOH in CH<sub>2</sub>Cl<sub>2</sub>) yielded α-methyl-β-hydroxylactam **53** as a yellow oil (152 mg, 72%).

**TLC:** R<sub>f</sub> 0.51 (95:5 CH<sub>2</sub>Cl<sub>2</sub>/MeOH). **IR** (ATR, ZnSe): 2935, 1719 (C=O st), 1672 (C=O st), 1496, 1245, 1016, 915, 733. **<sup>1</sup>H-NMR** (600 MHz): δ 7.15 (d, 1H, *J* = 8.6 Hz), 6.89 (d, 1H, *J* = 2.8 Hz), 6.83 (dd, 1H, *J* = 8.6, 2.9 Hz), 3.86 (s, 3H), 3.75 (s, 3H), 3.56 (q, 1H, *J* = 6.8 Hz), 3.06 (td, 1H, *J* = 14.4, 4.5 Hz), 2.70 (dt, 1H, *J* = 14.7, 4.2 Hz), 2.56 (ddd, 1H, *J* = 13.5, 7.0, 4.2 Hz), 2.30 (ddd, 1H, *J* = 13.5, 9.9, 7.3 Hz), 1.93 (ddq, 1H, *J* = 17.8, 7.9, 4.6 Hz), 1.81 (ddq, 1H, *J* = 13.8, 10.4, 3.6 Hz), 1.74 – 1.66 (m, 1H), 1.26 (d, 3H, *J* = 6.8 Hz), 1.14 – 1.06 (m, 1H). **<sup>13</sup>C-NMR** (151 MHz): δ 205.7, 168.0, 161.1, 142.9, 130.7, 130.2, 115.8, 112.4, 60.6, 55.5, 47.5, 38.2, 29.0, 26.5, 21.1, 12.3. **HRMS** (ESI) *m/z* calcd for C<sub>16</sub>H<sub>21</sub>NO<sub>4</sub>Na ([M+Na]<sup>+</sup>) 314.1368; found 314.1353.

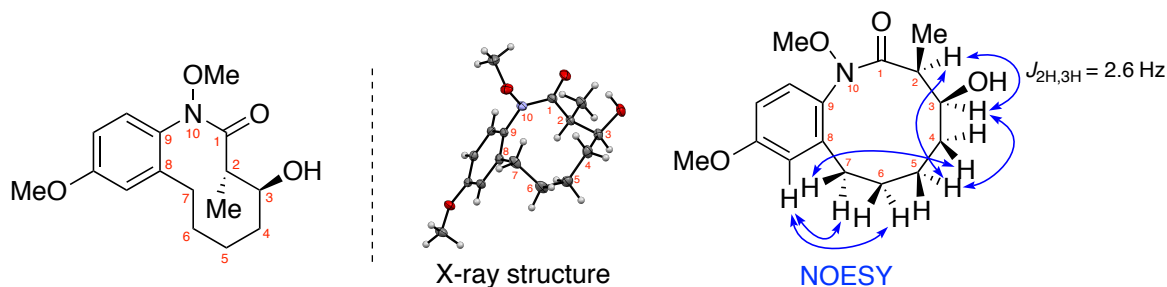

**(3*S*\*,4*S*\*)-4-hydroxy-1,10-dimethoxy-3-methyl-3,4,5,6,7,8-hexahydrobenzo[*b*]azecin-2(1*H*)-one (54).** α-Methyl methoxyaryl lactam **53** (10.0 mg, 34.0 μmol, 1.00 equiv) was dissolved in THF (0.5 mL) and cooled to 0 °C. A solution of L-Selectride (1.00 M in THF, 70.0 μL, 68.0 μmol, 2.00 equiv) was added and the reaction was stirred for 1 h. The reaction was quenched with satd aq NH<sub>4</sub>Cl at 0 °C, warmed to 24 °C and diluted with CH<sub>2</sub>Cl<sub>2</sub>. The mixture was extracted with CH<sub>2</sub>Cl<sub>2</sub> (3 × 20 mL). The combined organic extracts were washed with brine, dried (Na<sub>2</sub>SO<sub>4</sub>), filtered, and concentrated by rotary evaporation to afford the crude product. Purification by silica flash chromatography (0% → 10% MeOH in CH<sub>2</sub>Cl<sub>2</sub>) yielded hydroxylactam **54** as a white solid (9.5 mg, 94%). The relative stereochemistry of **54** was assigned as *anti*-α-methyl-β-hydroxylactam based on X-ray crystal structure analysis (see Section F below). Key diagnostic NOESY correlations were entirely consistent with the ring conformation assignment.

**TLC:**  $R_f$  0.35 (95:5  $\text{CH}_2\text{Cl}_2/\text{MeOH}$ ). **IR** (ATR, ZnSe): 3464 (O–H st), 2936, 2874, 1651 (C=O st), 1495, 1425, 1242, 1217, 984, 738.  **$^1\text{H-NMR}$**  (600 MHz):  $\delta$  7.09 (d, 1H,  $J = 8.6$  Hz), 6.89 (d, 1H,  $J = 2.6$  Hz), 6.80 (dd, 1H,  $J = 8.5, 2.7$  Hz), 3.85 (s, 3H), 3.74 (s, 3H), 3.73 (br s, 1H), 3.26 (tt, 1H,  $J = 11.5, 2.7$  Hz), 2.96 (td, 1H,  $J = 13.8, 4.3$  Hz), 2.60 (dt, 1H,  $J = 13.8, 4.0$  Hz), 2.56 (qd, 1H,  $J = 6.9, 2.6$  Hz), 1.89 (dtd, 1H,  $J = 13.8, 10.0, 3.6$  Hz), 1.79 (ddt, 1H,  $J = 17.6, 13.1, 4.0$  Hz), 1.69 (tq, 1H,  $J = 13.8, 3.4$  Hz), 1.46 (tdd, 1H,  $J = 13.6, 8.1, 3.4$  Hz), 1.35 (td, 1H,  $J = 13.1, 9.3$  Hz), 1.28 (d, 1H,  $J = 6.9$  Hz), 0.38 (tdd, 1H,  $J = 13.6, 9.4, 2.8$  Hz).  **$^{13}\text{C-NMR}$**  (151 MHz):  $\delta$  173.0, 161.2, 143.4, 130.2, 130.1, 115.7, 112.0, 73.9, 60.5, 55.5, 37.3, 32.3, 29.2, 26.2, 19.5, 14.7. **HRMS** (ESI)  $m/z$  calcd for  $\text{C}_{16}\text{H}_{23}\text{NO}_4\text{Na}$  ( $[\text{M}+\text{Na}]^+$ ) 316.1525; found 316.1520.

## 6. REDUCTIVE AMINATION OF $\alpha$ -METHYL- $\beta$ -KETOLACTAM **53**

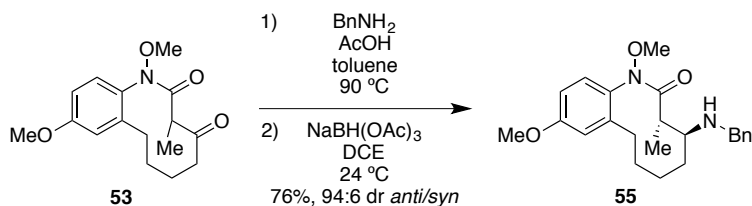

Supplementary Figure 22. Synthesis of  $\alpha$ -methyl- $\beta$ -hydroxylactam **55**.

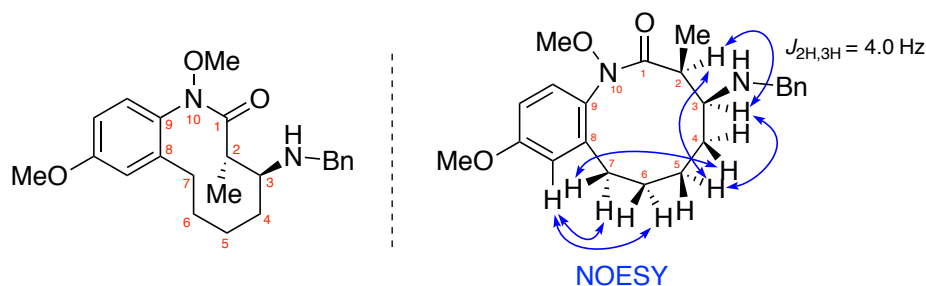

**(3*S*\*,4*S*\*)-4-(benzylamino)-1,10-dimethoxy-3-methyl-3,4,5,6,7,8-hexahydrobenzo[*b*]azecin-2(1*H*)-one (55).**  $\alpha$ -Methyl methoxyaryl lactam **53** (50.0 mg, 0.170 mmol, 1.00 equiv) was dissolved in toluene (1.7 mL) and benzyl amine (20.6  $\mu\text{L}$ , 0.190 mmol, 1.10 equiv), acetic acid (17.0 M, 10.0  $\mu\text{L}$ , 0.170 mmol, 1.00 equiv) and crushed molecular sieves ( $\approx 50$  mg) were added and the reaction was stirred at 90 °C for 2 h. The reaction mixture was then cooled to 24 °C and filtered through a pad of Celite. The filtrate was concentrated by rotary evaporation to afford the crude imine, which was used directly in the following step. The imine was dissolved in dichloroethane (1.7 mL) and sodium triacetoxyborohydride (145 mg, 0.690 mmol, 4.00 equiv) was added. The resulting reaction mixture was stirred at 24 °C for 16 h. The reaction was quenched with satd aq  $\text{NaHCO}_3$  and diluted with  $\text{CH}_2\text{Cl}_2$ . The mixture was extracted with  $\text{CH}_2\text{Cl}_2$  (3  $\times$  20 mL). The combined organic extracts were washed with brine, dried ( $\text{Na}_2\text{SO}_4$ ), filtered, and concentrated by rotary evaporation to afford the crude product. Purification by silica flash chromatography (30%  $\rightarrow$  80% EtOAc in hexanes) yielded amine **55** as a colorless oil (51 mg, 76%). The relative stereochemistry of **55** was assigned as *anti*- $\alpha$ -methyl- $\beta$ -aminolactam based on extensive NMR studies. The key diagnostic NOESY correlations of **55** showed perfect alignment with the NOESY correlations of *anti*- $\alpha$ -methyl- $\beta$ -hydroxylactam **54**. Additionally, the  $J_{2\text{H},3\text{H}}$  coupling constants of both **54** and **55** support *anti* configuration.

**TLC:**  $R_f$  0.32 (95:5 CH<sub>2</sub>Cl<sub>2</sub>/MeOH). **IR** (ATR, ZnSe): 2933, 2869, 1664 (C=O st), 1494, 1463, 1246, 1027, 912, 736. **<sup>1</sup>H-NMR** (600 MHz):  $\delta$  7.36 (d, 2H,  $J = 7.5$  Hz), 7.29 – 7.27 (m, 2H), 7.18 (t, 1H,  $J = 7.3$  Hz), 7.06 (d, 1H,  $J = 8.6$  Hz), 6.86 (d, 1H,  $J = 2.8$  Hz), 6.77 (dd, 1H,  $J = 8.6, 2.9$  Hz), 3.97 (d, 1H,  $J = 13.8$  Hz), 3.84 (s, 3H), 3.73 (s, 3H), 3.65 (d, 1H,  $J = 13.8$  Hz), 3.01 (td, 1H,  $J = 13.7, 4.4$  Hz), 2.63 (qd, 1H,  $J = 6.9, 4.0$  Hz), 2.58 (dt, 1H,  $J = 13.9, 3.7$  Hz), 2.19 (dt, 1H,  $J = 12.1, 3.2$  Hz), 2.01 (dtd, 1H,  $J = 12.7, 9.9, 2.2$  Hz), 1.76 (tq, 1H,  $J = 13.3, 4.5$  Hz), 1.68 (dtd, 1H,  $J = 13.7, 6.8, 2.9$  Hz), 1.34 (dddt, 1H,  $J = 13.5, 9.9, 6.9, 3.4$  Hz), 1.25 (d, 3H,  $J = 6.9$  Hz), 1.09 (td, 1H,  $J = 12.6, 9.5$  Hz), 0.43 (tdd, 1H,  $J = 13.4, 9.8, 2.5$  Hz). **<sup>13</sup>C-NMR** (151 MHz): <sup>13</sup>C NMR (151 MHz, CDCl<sub>3</sub>)  $\delta$  172.6, 160.9, 143.6, 141.5, 130.9, 130.2, 128.0, 128.0, 126.4, 115.6, 111.9, 60.2, 59.3, 55.5, 50.7, 37.4, 29.3, 27.8, 26.5, 20.9, 15.2. **HRMS** (ESI)  $m/z$  calcd for C<sub>23</sub>H<sub>31</sub>N<sub>2</sub>O<sub>3</sub> ([M+H]<sup>+</sup>) 383.2335; found 383.2339.

### 7. ALDOL-TISHCHENKO REACTION OF $\alpha$ -METHYL- $\beta$ -KETOLACTAM **53**

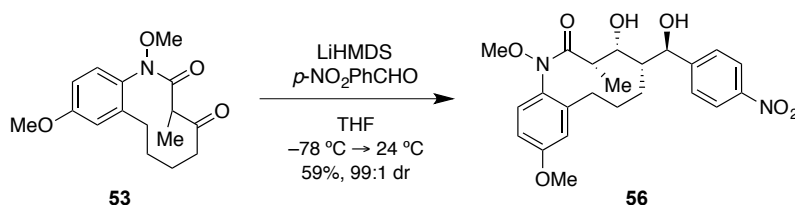

**Supplementary Figure 23. Synthesis of 1,3-diol **56**.**

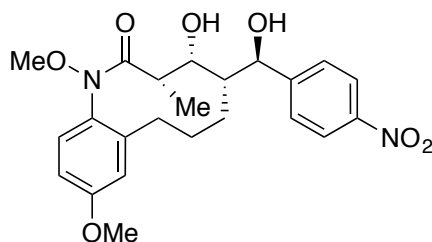

**(3*S*\*,4*R*\*,5*R*\*)-4-hydroxy-5-((*R*\*)-hydroxy(4-nitrophenyl)methyl)-1,10-dimethoxy-3-methyl-3,4,5,6,7,8-hexahydrobenzo[*b*]azecin-2(1*H*)-one (**56**).**  $\alpha$ -Methyl methoxyaryl lactam **53** (20.0 mg, 68.0  $\mu$ mol, 1.00 equiv) was dissolved in THF (0.7 mL) and cooled to -78 °C. A solution of LiHMDS (1.00 M in THF, 2.00 mL, 2.04 mmol, 3.00 equiv) was added and the reaction was stirred for 1 h. A solution of *p*-nitrobenzaldehyde (0.100 M in THF, 26.0 mg, 0.170 mmol, 2.50 equiv) was added and the reaction was stirred for an additional 15 h while the reaction slowly warmed to 24 °C. The reaction was quenched with satd aq NH<sub>4</sub>Cl and diluted with EtOAc. The mixture was extracted with EtOAc (3  $\times$  20 mL). The combined organic extracts were washed with brine, dried (Na<sub>2</sub>SO<sub>4</sub>), filtered, and concentrated by rotary evaporation to afford the crude product. Purification by silica flash chromatography (0% → 10% MeOH in CH<sub>2</sub>Cl<sub>2</sub>) yielded 1,3-diol **56** as a yellow oil (18 mg, 59%, 99:1 dr).

**TLC:**  $R_f$  0.33 (95:5 CH<sub>2</sub>Cl<sub>2</sub>/MeOH). **IR** (ATR, ZnSe): 3425 (O–H st), 2931, 2874, 1650 (C=O st), 1347, 1243, 911, 736. **<sup>1</sup>H-NMR** (600 MHz):  $\delta$  8.24 (d, 2H,  $J = 8.6$  Hz), 7.56 (d, 2H,  $J = 8.6$  Hz), 7.08 (d, 1H,  $J = 8.4$  Hz), 6.91 (d, 1H,  $J = 2.7$  Hz), 6.80 (dd, 1H,  $J = 8.6, 2.8$  Hz), 4.91 (d, 1H,  $J = 3.6$  Hz), 3.85 (s, 3H), 3.82 (d, 1H,  $J = 9.7$  Hz), 3.67 (s, 3H), 2.78 (td, 1H,  $J = 14.0, 3.9$  Hz), 2.64 (dt, 1H,  $J = 14.5, 3.9$  Hz), 2.40 (dq, 1H,  $J = 9.5, 6.5$  Hz), 1.85 – 1.78 (m, 2H), 1.72 – 1.67 (m, 1H), 1.55 (t, 1H,  $J = 13.9$  Hz), 1.14 (d, 3H,  $J = 6.6$  Hz), 1.01 (t, 1H,  $J = 14.4$  Hz). **<sup>13</sup>C-NMR** (151 MHz):  $\delta$  170.9, 161.3, 150.6, 147.1, 142.9, 130.3, 128.6, 126.7

(2C), 123.8 (2C), 115.6, 112.2, 75.2, 73.7, 60.5, 55.6, 43.2, 41.3, 27.3, 26.5, 20.4, 14.5. **HRMS** (ESI)  $m/z$  calcd for  $C_{23}H_{27}N_2O_7$  ( $[M-H]^-$ ) 443.1818; found 443.1830.

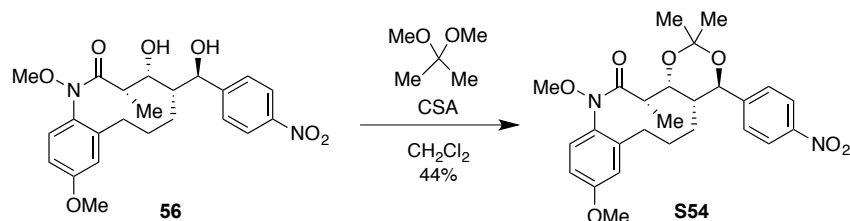

**Supplementary Figure 24. Synthesis of acetone S54.**

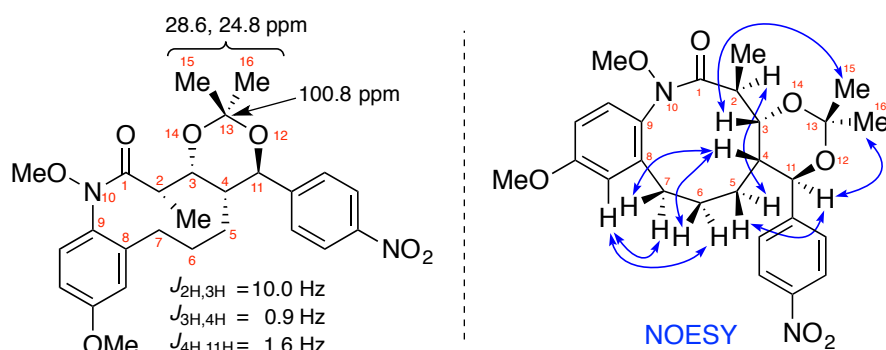

**(4*R*\*,4*aR*\*,14*S*\*,14*aR*\*)-9,12-dimethoxy-2,2,14-trimethyl-4-(4-nitrophenyl)-4,4a,5,6,7,12,14,14a-octahydro-13*H*-benzo[*b*][1,3]dioxino[5,4-*g*]azecin-13-one (**S54**).** Diol **56** (4.3 mg, 10 μmol, 1.0 equiv) was dissolved in CH<sub>2</sub>Cl<sub>2</sub> (1.0 mL). Dimethoxypropane (6.0 μL, 50 μmol, 5.0 equiv) and camphorsulfonic acid (10 mM in CH<sub>2</sub>Cl<sub>2</sub>, 0.10 mL, 1.0 μmol, 0.10 equiv) were added. The resultant reaction mixture was stirred at 24 °C for 16 h. The mixture was concentrated by rotary evaporation to afford the crude product. Purification by silica flash chromatography (0% → 10% EtOAc in hexanes) yielded acetone **S54** as a yellow oil (2.1 mg, 44%). Upon extensive NMR analysis of **S54**, the relative stereochemistry of the acetone was assigned as *anti*-1,3-diol acetone. Characteristic <sup>13</sup>C NMR resonances reported in the literature<sup>30</sup> for the ketal carbon as well as the geminal dimethyl groups were in agreement with the observed NMR data of **S54**. The assigned stereochemistry was also supported by NOESY correlations analogous to the observed NOESY correlations in **54** and **55**.

**TLC:**  $R_f$  0.77 (95:5 CH<sub>2</sub>Cl<sub>2</sub>/MeOH). **IR** (ATR, ZnSe): 2933, 1670 (C=O st), 1522, 1350, 1244, 741, 669. **<sup>1</sup>H-NMR** (600 MHz): δ 8.24 (d, 2H,  $J = 8.6$  Hz), 7.68 (d, 2H,  $J = 8.7$  Hz), 7.15 (d, 1H,  $J = 8.5$  Hz), 6.92 (d, 1H,  $J = 2.8$  Hz), 6.80 (dd, 1H,  $J = 8.5, 2.8$  Hz), 4.74 (d, 1H,  $J = 1.6$  Hz), 4.18 (dd, 1H,  $J = 10.1, 0.9$  Hz), 3.86 (s, 3H), 3.75 (s, 3H), 2.76 (td, 1H,  $J = 13.9, 3.8$  Hz), 2.64 (dt, 1H,  $J = 14.4, 3.9$  Hz), 2.54 (dq, 1H,  $J = 10.0, 6.6$  Hz), 2.04 (d, 1H,  $J = 6.4$  Hz), 1.87 (t, 1H,  $J = 13.8$  Hz), 1.69 – 1.60 (m, 2H), 1.33 (s, 3H), 1.20 (d, 3H,  $J = 6.5$  Hz), 1.03 (s, 3H), 0.87 – 0.80 (m, 1H). **<sup>13</sup>C-NMR** (151 MHz): δ 171.6, 161.3, 149.6, 147.1, 143.0, 130.4, 130.3, 128.0 (2C), 123.8 (2C), 115.8, 112.0, 100.8, 76.5, 71.0, 60.6, 55.6, 39.2, 35.4, 28.6, 28.2, 26.9, 24.8, 24.4, 14.5. **HRMS** (ESI)  $m/z$  calcd for  $C_{26}H_{32}N_2O_7Na$  ( $[M+Na]^+$ ) 507.2107; found 507.2090.

<sup>30</sup> Evans, D. A.; Rieger, D. L.; Gage, J. R. *Tetrahedron Lett.* **1990**, *31*, 7099–7100.

## H. X-RAY CRYSTALLOGRAPHIC ANALYSIS OF *ANTI*- $\alpha$ -METHYL- $\beta$ -HYDROXYLACTAM **54**

a)

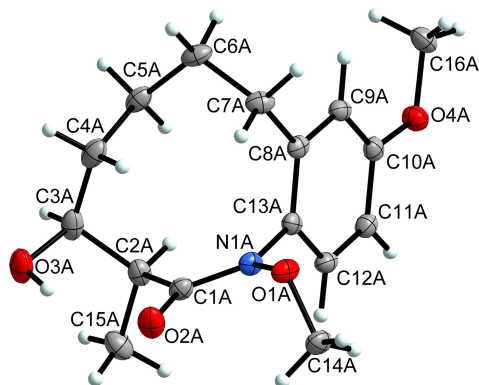

b)

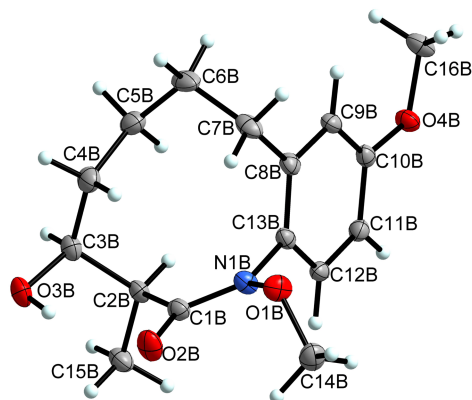

**Supplementary Figure 25. X-ray crystal structures of anti  $\alpha$ -methyl- $\beta$ -hydroxylactam **54**. The two cocrystallized conformers A (a) and B (b) are shown.**

Lactam **54** (10 mg) was placed in a 15 mL conical flask and dissolved in 1.5 mL EtOAc/pentane (3:1) upon heating. After 3 days at 24 °C, clear needle shaped crystals were obtained for X-ray crystallographic analysis.

A colorless irregular prism-like specimen of  $C_{16}H_{23}NO_4$ , approximate dimensions 0.116 mm  $\times$  0.227 mm  $\times$  0.246 mm, was used for the X-ray crystallographic analysis. The X-ray intensity data were measured.

The total exposure time was 27.54 hours. The frames were integrated with the Bruker SAINT software package using a narrow-frame algorithm. The integration of the data using a monoclinic unit cell yielded a total of 52524 reflections to a maximum  $\theta$  angle of 71.17° (0.81 Å resolution), of which 5853 were independent (average redundancy 8.974, completeness = 98.2%,  $R_{int} = 2.32\%$ ,  $R_{sig} = 1.16\%$ ) and 5679 (97.03%) were greater than  $2\sigma(F^2)$ . The final cell constants of  $a = 9.2770(5)$  Å,  $b = 32.3108(18)$  Å,  $c = 11.1622(6)$  Å,  $\beta = 113.1263(17)^\circ$ , volume = 3077.0(3) Å<sup>3</sup>, are based upon the refinement of the XYZ-centroids of 9001 reflections above  $20 \sigma(I)$  with  $9.039^\circ < 2\theta < 141.7^\circ$ . Data were corrected for absorption effects using the Multi-Scan method (SADABS). The ratio of minimum to maximum apparent transmission was 0.914.

The structure was solved and refined using the Bruker SHELXTL Software Package, using the space group  $P2_1/c$ , with  $Z = 8$  for the formula unit,  $C_{16}H_{23}NO_4$ . The final anisotropic full-matrix least-squares refinement on  $F^2$  with 563 variables converged at  $R1 = 3.41\%$ , for the observed data and  $wR2 = 8.42\%$  for all data. The goodness-of-fit was 1.044. The largest peak in the final difference electron density synthesis was 0.228 e<sup>-</sup>/Å<sup>3</sup> and the largest hole was -0.245 e<sup>-</sup>/Å<sup>3</sup> with an RMS deviation of 0.041 e<sup>-</sup>/Å<sup>3</sup>. On the basis of the final model, the calculated density was 1.267 g/cm<sup>3</sup> and  $F(000)$ , 1264 e<sup>-</sup>.

CCDC 1534702 contains the supplementary crystallographic data for this paper. These data can be obtained free of charge from The Cambridge Crystallographic Data Centre via [www.ccdc.cam.ac.uk/data\\_request/cif](http://www.ccdc.cam.ac.uk/data_request/cif)

**Supplementary Table 5. Sample and crystal data for  $\alpha$ -methyl- $\beta$ -hydroxylactam 54.**

|                               |                                                    |                              |
|-------------------------------|----------------------------------------------------|------------------------------|
| <b>Identification code</b>    | $\alpha$ -methyl- $\beta$ -hydroxylactam <b>54</b> |                              |
| <b>Chemical formula</b>       | C <sub>16</sub> H <sub>23</sub> NO <sub>4</sub>    |                              |
| <b>Formula weight</b>         | 293.36 g/mol                                       |                              |
| <b>Temperature</b>            | 100(2) K                                           |                              |
| <b>Wavelength</b>             | 1.54178 Å                                          |                              |
| <b>Crystal size</b>           | 0.116 × 0.227 × 0.246 mm                           |                              |
| <b>Crystal habit</b>          | colorless irregular prism                          |                              |
| <b>Crystal system</b>         | monoclinic                                         |                              |
| <b>Space group</b>            | P 1 21/c 1                                         |                              |
| <b>Unit cell dimensions</b>   | a = 9.2770(5) Å                                    | $\alpha = 90^\circ$          |
|                               | b = 32.3108(18) Å                                  | $\beta = 113.1263(17)^\circ$ |
|                               | c = 11.1622(6) Å                                   | $\gamma = 90^\circ$          |
| <b>Volume</b>                 | 3077.0(3) Å <sup>3</sup>                           |                              |
| <b>Z</b>                      | 8                                                  |                              |
| <b>Density (calculated)</b>   | 1.267 g/cm <sup>3</sup>                            |                              |
| <b>Absorption coefficient</b> | 0.739 mm <sup>-1</sup>                             |                              |
| <b>F(000)</b>                 | 1264                                               |                              |



**Supplementary Table 6. Data collection and structure refinement for  $\alpha$ -methyl- $\beta$ -hydroxylactam 54.**

|                                     |                                                                                                                                                               |                           |
|-------------------------------------|---------------------------------------------------------------------------------------------------------------------------------------------------------------|---------------------------|
| Theta range for data collection     | 2.73 to 71.17°                                                                                                                                                |                           |
| Index ranges                        | -11≤h≤11, -39≤k≤39, -13≤l≤13                                                                                                                                  |                           |
| Reflections collected               | 52524                                                                                                                                                         |                           |
| Independent reflections             | 5853 [R(int) = 0.0232]                                                                                                                                        |                           |
| Coverage of independent reflections | 98.2%                                                                                                                                                         |                           |
| Absorption correction               | multi-scan                                                                                                                                                    |                           |
| Structure solution technique        | direct methods                                                                                                                                                |                           |
| Structure solution program          | XT, VERSION 2014/4                                                                                                                                            |                           |
| Refinement method                   | full-matrix least-squares on F <sup>2</sup>                                                                                                                   |                           |
| Refinement program                  | SHELXL-2014/7 (Sheldrick, 2014)                                                                                                                               |                           |
| Function minimized                  | $\Sigma w(F_o^2 - F_c^2)^2$                                                                                                                                   |                           |
| Data / restraints / parameters      | 5853 / 0 / 563                                                                                                                                                |                           |
| Goodness-of-fit on F <sup>2</sup>   | 1.044                                                                                                                                                         |                           |
| $\Delta/\sigma_{\max}$              | 0.001                                                                                                                                                         |                           |
| Final R indices                     | 5679 data;  >2σ(I)                                                                                                                                            | R1 = 0.0341, wR2 = 0.0836 |
|                                     | all data                                                                                                                                                      | R1 = 0.0348, wR2 = 0.0842 |
| Weighting scheme                    | w=1/[σ <sup>2</sup> (F <sub>o</sub> <sup>2</sup> )+(0.0406P) <sup>2</sup> +1.2059P]<br>where P=(F <sub>o</sub> <sup>2</sup> +2F <sub>c</sub> <sup>2</sup> )/3 |                           |
| Largest diff. peak and hole         | 0.228 and -0.245 eÅ <sup>-3</sup>                                                                                                                             |                           |
| R.M.S. deviation from mean          | 0.041 eÅ <sup>-3</sup>                                                                                                                                        |                           |

**Supplementary Table 7. Atomic coordinates and equivalent isotropic atomic displacement parameters ( $\text{\AA}^2$ ) for  $\alpha$ -methyl- $\beta$ -hydroxylactam 54.** U(eq) is defined as one third of the trace of the orthogonalized  $U_{ij}$  tensor.

|      | x/a         | y/b        | z/c         | U(eq)       |
|------|-------------|------------|-------------|-------------|
| O1A  | 0.41488(9)  | 0.57762(2) | 0.43376(7)  | 0.02165(17) |
| O2A  | 0.43762(9)  | 0.60291(3) | 0.21674(8)  | 0.02852(19) |
| O3A  | 0.38570(10) | 0.56748(3) | 0.97629(9)  | 0.0311(2)   |
| O4A  | 0.76172(9)  | 0.49479(2) | 0.32652(8)  | 0.02435(18) |
| N1A  | 0.28955(10) | 0.57250(3) | 0.31166(8)  | 0.01818(19) |
| C1A  | 0.31634(12) | 0.58468(3) | 0.20678(10) | 0.0194(2)   |
| C2A  | 0.19181(13) | 0.57426(3) | 0.07397(10) | 0.0202(2)   |
| C3A  | 0.26872(13) | 0.54564(4) | 0.00492(11) | 0.0243(2)   |
| C4A  | 0.33760(13) | 0.50631(4) | 0.08235(12) | 0.0255(2)   |
| C5A  | 0.21540(13) | 0.47714(4) | 0.09868(11) | 0.0228(2)   |
| C6A  | 0.27237(13) | 0.45405(3) | 0.22862(12) | 0.0238(2)   |
| C7A  | 0.30375(13) | 0.48240(3) | 0.34759(11) | 0.0223(2)   |
| C8A  | 0.16213(12) | 0.50812(3) | 0.33487(10) | 0.0179(2)   |
| C9A  | 0.02966(13) | 0.48857(3) | 0.33947(10) | 0.0189(2)   |
| C10A | 0.89515(12) | 0.51103(3) | 0.32328(10) | 0.0189(2)   |
| C11A | 0.89140(13) | 0.55377(3) | 0.30307(10) | 0.0200(2)   |
| C12A | 0.02201(13) | 0.57352(3) | 0.30012(10) | 0.0192(2)   |
| C13A | 0.15615(12) | 0.55095(3) | 0.31503(10) | 0.0171(2)   |
| C14A | 0.41124(15) | 0.61869(4) | 0.48182(11) | 0.0244(2)   |
| C15A | 0.12557(15) | 0.61429(4) | 0.99930(12) | 0.0296(3)   |
| C16A | 0.75788(15) | 0.45111(4) | 0.34510(12) | 0.0258(2)   |
| O1B  | 0.77179(9)  | 0.83300(3) | 0.58778(8)  | 0.02488(18) |
| O2B  | 0.52013(10) | 0.78503(3) | 0.52102(8)  | 0.0287(2)   |
| O3B  | 0.46121(10) | 0.70684(3) | 0.59967(8)  | 0.02595(18) |
| O4B  | 0.10494(9)  | 0.85875(2) | 0.19138(7)  | 0.02165(17) |
| N1B  | 0.71956(10) | 0.81713(3) | 0.68201(8)  | 0.01899(19) |
| C1B  | 0.59642(12) | 0.79086(3) | 0.63818(10) | 0.0190(2)   |
| C2B  | 0.55919(12) | 0.76759(3) | 0.74082(10) | 0.0177(2)   |
| C3B  | 0.57819(13) | 0.72085(3) | 0.72101(11) | 0.0212(2)   |
| C4B  | 0.74179(14) | 0.70999(4) | 0.72833(12) | 0.0251(2)   |
| C5B  | 0.87494(14) | 0.71762(4) | 0.86206(12) | 0.0262(3)   |
| C6B  | 0.02825(14) | 0.73172(4) | 0.85469(13) | 0.0287(3)   |
| C7B  | 0.02233(13) | 0.77538(4) | 0.79737(12) | 0.0245(2)   |
| C8B  | 0.96929(12) | 0.80771(3) | 0.86898(10) | 0.0183(2)   |
| C9B  | 0.06719(12) | 0.81850(3) | 0.99659(10) | 0.0185(2)   |
| C10B | 0.01676(12) | 0.84623(3) | 0.06728(10) | 0.0174(2)   |
| C11B | 0.86671(12) | 0.86349(3) | 0.01178(10) | 0.0182(2)   |

|      | <b>x/a</b>  | <b>y/b</b> | <b>z/c</b>  | <b>U(eq)</b> |
|------|-------------|------------|-------------|--------------|
| C12B | 0.77032(12) | 0.85379(3) | 0.88523(10) | 0.0176(2)    |
| C13B | 0.82146(12) | 0.82625(3) | 0.81413(10) | 0.0169(2)    |
| C14B | 0.68351(15) | 0.86921(4) | 0.52767(12) | 0.0277(3)    |
| C15B | 0.39505(13) | 0.77825(4) | 0.73198(12) | 0.0241(2)    |
| C16B | 0.26343(13) | 0.84427(4) | 0.25018(11) | 0.0244(2)    |

**Supplementary Table 8. Bond lengths (Å) for  $\alpha$ -methyl- $\beta$ -hydroxylactam 54.**

|           |            |           |            |
|-----------|------------|-----------|------------|
| O1A-N1A   | 1.4114(11) | O1A-C14A  | 1.4368(13) |
| O2A-C1A   | 1.2357(13) | O3A-C3A   | 1.4319(14) |
| O3A-H3OA  | 0.86(2)    | O4A-C10A  | 1.3579(13) |
| O4A-C16A  | 1.4290(14) | N1A-C1A   | 1.3475(14) |
| N1A-C13A  | 1.4333(14) | C1A-C2A   | 1.5167(14) |
| C2A-C15A  | 1.5308(16) | C2A-C3A   | 1.5459(16) |
| C2A-H2A   | 0.965(13)  | C3A-C4A   | 1.5287(18) |
| C3A-H3A   | 0.969(13)  | C4A-C5A   | 1.5391(16) |
| C4A-H4A   | 0.998(15)  | C4A-H4B   | 0.959(15)  |
| C5A-C6A   | 1.5287(17) | C5A-H5A   | 0.992(14)  |
| C5A-H5B   | 0.996(14)  | C6A-C7A   | 1.5438(16) |
| C6A-H6A   | 1.007(14)  | C6A-H6B   | 0.987(14)  |
| C7A-C8A   | 1.5134(15) | C7A-H7A   | 0.996(15)  |
| C7A-H7B   | 0.976(14)  | C8A-C13A  | 1.3990(15) |
| C8A-C9A   | 1.4005(15) | C9A-C10A  | 1.3924(15) |
| C9A-H9A   | 0.965(14)  | C10A-C11A | 1.3975(16) |
| C11A-C12A | 1.3812(16) | C11A-H11A | 0.958(14)  |
| C12A-C13A | 1.3948(15) | C12A-H12A | 0.960(14)  |
| C14A-H14A | 0.957(16)  | C14A-H14B | 0.974(14)  |
| C14A-H14C | 0.975(16)  | C15A-H15A | 0.974(16)  |
| C15A-H15B | 1.009(17)  | C15A-H15C | 0.958(17)  |
| C16A-H16A | 0.996(15)  | C16A-H16B | 0.983(16)  |
| C16A-H16C | 0.983(15)  | O1B-N1B   | 1.4157(11) |
| O1B-C14B  | 1.4345(15) | O2B-C1B   | 1.2327(13) |
| O3B-C3B   | 1.4361(13) | O3B-H3OB  | 0.90(2)    |
| O4B-C10B  | 1.3644(13) | O4B-C16B  | 1.4330(13) |
| N1B-C1B   | 1.3514(14) | N1B-C13B  | 1.4354(13) |
| C1B-C2B   | 1.5191(15) | C2B-C15B  | 1.5261(15) |
| C2B-C3B   | 1.5463(15) | C2B-H2B   | 0.963(13)  |
| C3B-C4B   | 1.5283(16) | C3B-H3B   | 0.984(14)  |
| C4B-C5B   | 1.5384(16) | C4B-H4C   | 1.018(15)  |
| C4B-H4D   | 0.952(16)  | C5B-C6B   | 1.5260(18) |
| C5B-H5C   | 1.001(14)  | C5B-H5D   | 0.990(16)  |
| C6B-C7B   | 1.5410(18) | C6B-H6C   | 0.969(16)  |
| C6B-H6D   | 0.979(15)  | C7B-C8B   | 1.5105(15) |
| C7B-H7C   | 0.987(15)  | C7B-H7D   | 0.972(15)  |
| C8B-C13B  | 1.3981(15) | C8B-C9B   | 1.3997(15) |
| C9B-C10B  | 1.3907(15) | C9B-H9B   | 0.961(14)  |
| C10B-C11B | 1.3983(15) | C11B-C12B | 1.3787(15) |

|           |           |           |            |
|-----------|-----------|-----------|------------|
| C11B-H11B | 0.977(14) | C12B-C13B | 1.3937(15) |
| C12B-H12B | 0.965(14) | C14B-H14D | 0.961(17)  |
| C14B-H14E | 0.954(16) | C14B-H14F | 0.995(16)  |
| C15B-H15D | 1.015(16) | C15B-H15E | 0.964(16)  |
| C15B-H15F | 1.007(16) | C16B-H16D | 0.987(16)  |
| C16B-H16E | 0.965(15) | C16B-H16F | 0.999(16)  |

**Supplementary Table 9. Bond angles (°) for  $\alpha$ -methyl- $\beta$ -hydroxylactam 54.**

|                |            |                |            |
|----------------|------------|----------------|------------|
| N1A-O1A-C14A   | 109.72(8)  | C3A-O3A-H3OA   | 105.9(14)  |
| C10A-O4A-C16A  | 117.41(9)  | C1A-N1A-O1A    | 116.21(8)  |
| C1A-N1A-C13A   | 128.35(9)  | O1A-N1A-C13A   | 115.08(8)  |
| O2A-C1A-N1A    | 122.22(10) | O2A-C1A-C2A    | 120.72(10) |
| N1A-C1A-C2A    | 117.05(9)  | C1A-C2A-C15A   | 109.47(9)  |
| C1A-C2A-C3A    | 107.25(9)  | C15A-C2A-C3A   | 113.52(10) |
| C1A-C2A-H2A    | 110.5(7)   | C15A-C2A-H2A   | 108.9(7)   |
| C3A-C2A-H2A    | 107.1(7)   | O3A-C3A-C4A    | 110.54(9)  |
| O3A-C3A-C2A    | 110.81(9)  | C4A-C3A-C2A    | 112.81(9)  |
| O3A-C3A-H3A    | 105.4(8)   | C4A-C3A-H3A    | 109.3(8)   |
| C2A-C3A-H3A    | 107.6(8)   | C3A-C4A-C5A    | 114.35(9)  |
| C3A-C4A-H4A    | 108.2(8)   | C5A-C4A-H4A    | 110.1(8)   |
| C3A-C4A-H4B    | 107.3(9)   | C5A-C4A-H4B    | 109.3(9)   |
| H4A-C4A-H4B    | 107.5(12)  | C6A-C5A-C4A    | 114.51(10) |
| C6A-C5A-H5A    | 107.0(8)   | C4A-C5A-H5A    | 110.1(8)   |
| C6A-C5A-H5B    | 108.8(8)   | C4A-C5A-H5B    | 108.4(8)   |
| H5A-C5A-H5B    | 107.8(11)  | C5A-C6A-C7A    | 113.88(9)  |
| C5A-C6A-H6A    | 107.4(8)   | C7A-C6A-H6A    | 109.7(8)   |
| C5A-C6A-H6B    | 109.0(8)   | C7A-C6A-H6B    | 109.4(8)   |
| H6A-C6A-H6B    | 107.3(11)  | C8A-C7A-C6A    | 112.44(9)  |
| C8A-C7A-H7A    | 108.9(8)   | C6A-C7A-H7A    | 109.2(8)   |
| C8A-C7A-H7B    | 109.3(8)   | C6A-C7A-H7B    | 109.6(8)   |
| H7A-C7A-H7B    | 107.3(11)  | C13A-C8A-C9A   | 118.10(10) |
| C13A-C8A-C7A   | 122.49(10) | C9A-C8A-C7A    | 119.39(10) |
| C10A-C9A-C8A   | 120.99(10) | C10A-C9A-H9A   | 121.5(8)   |
| C8A-C9A-H9A    | 117.5(8)   | O4A-C10A-C9A   | 125.11(10) |
| O4A-C10A-C11A  | 114.89(10) | C9A-C10A-C11A  | 120.00(10) |
| C12A-C11A-C10A | 119.60(10) | C12A-C11A-H11A | 121.2(8)   |
| C10A-C11A-H11A | 119.2(8)   | C11A-C12A-C13A | 120.37(10) |
| C11A-C12A-H12A | 121.2(8)   | C13A-C12A-H12A | 118.4(8)   |
| C12A-C13A-C8A  | 120.93(10) | C12A-C13A-N1A  | 118.81(9)  |
| C8A-C13A-N1A   | 120.25(9)  | O1A-C14A-H14A  | 111.5(9)   |
| O1A-C14A-H14B  | 102.1(8)   | H14A-C14A-H14B | 108.9(11)  |
| O1A-C14A-H14C  | 109.9(9)   | H14A-C14A-H14C | 111.7(13)  |
| H14B-C14A-H14C | 112.3(12)  | C2A-C15A-H15A  | 110.9(9)   |
| C2A-C15A-H15B  | 110.5(9)   | H15A-C15A-H15B | 107.9(12)  |
| C2A-C15A-H15C  | 111.3(10)  | H15A-C15A-H15C | 107.6(13)  |
| H15B-C15A-H15C | 108.5(13)  | O4A-C16A-H16A  | 110.4(8)   |
| O4A-C16A-H16B  | 105.2(9)   | H16A-C16A-H16B | 110.7(12)  |

|                |            |                |            |
|----------------|------------|----------------|------------|
| O4A-C16A-H16C  | 110.5(8)   | H16A-C16A-H16C | 110.9(12)  |
| H16B-C16A-H16C | 108.9(12)  | N1B-O1B-C14B   | 110.10(8)  |
| C3B-O3B-H3OB   | 103.5(12)  | C10B-O4B-C16B  | 117.80(9)  |
| C1B-N1B-O1B    | 116.48(8)  | C1B-N1B-C13B   | 128.52(9)  |
| O1B-N1B-C13B   | 114.18(8)  | O2B-C1B-N1B    | 122.10(10) |
| O2B-C1B-C2B    | 121.25(10) | N1B-C1B-C2B    | 116.63(9)  |
| C1B-C2B-C15B   | 110.87(9)  | C1B-C2B-C3B    | 107.63(9)  |
| C15B-C2B-C3B   | 112.21(9)  | C1B-C2B-H2B    | 110.7(7)   |
| C15B-C2B-H2B   | 108.4(7)   | C3B-C2B-H2B    | 107.0(7)   |
| O3B-C3B-C4B    | 110.17(9)  | O3B-C3B-C2B    | 110.88(9)  |
| C4B-C3B-C2B    | 112.53(9)  | O3B-C3B-H3B    | 106.7(8)   |
| C4B-C3B-H3B    | 108.7(8)   | C2B-C3B-H3B    | 107.7(8)   |
| C3B-C4B-C5B    | 114.66(10) | C3B-C4B-H4C    | 108.3(8)   |
| C5B-C4B-H4C    | 110.8(8)   | C3B-C4B-H4D    | 108.9(9)   |
| C5B-C4B-H4D    | 108.6(9)   | H4C-C4B-H4D    | 105.0(12)  |
| C6B-C5B-C4B    | 113.93(11) | C6B-C5B-H5C    | 107.3(8)   |
| C4B-C5B-H5C    | 111.2(8)   | C6B-C5B-H5D    | 108.1(9)   |
| C4B-C5B-H5D    | 109.3(9)   | H5C-C5B-H5D    | 106.8(12)  |
| C5B-C6B-C7B    | 114.43(9)  | C5B-C6B-H6C    | 109.5(9)   |
| C7B-C6B-H6C    | 108.6(9)   | C5B-C6B-H6D    | 110.7(9)   |
| C7B-C6B-H6D    | 106.5(9)   | H6C-C6B-H6D    | 106.8(12)  |
| C8B-C7B-C6B    | 112.30(10) | C8B-C7B-H7C    | 111.1(8)   |
| C6B-C7B-H7C    | 109.4(8)   | C8B-C7B-H7D    | 108.9(8)   |
| C6B-C7B-H7D    | 108.4(9)   | H7C-C7B-H7D    | 106.6(12)  |
| C13B-C8B-C9B   | 118.15(10) | C13B-C8B-C7B   | 122.14(10) |
| C9B-C8B-C7B    | 119.65(10) | C10B-C9B-C8B   | 120.63(10) |
| C10B-C9B-H9B   | 120.4(8)   | C8B-C9B-H9B    | 119.0(8)   |
| O4B-C10B-C9B   | 124.47(10) | O4B-C10B-C11B  | 115.28(9)  |
| C9B-C10B-C11B  | 120.25(10) | C12B-C11B-C10B | 119.70(10) |
| C12B-C11B-H11B | 121.2(8)   | C10B-C11B-H11B | 119.1(8)   |
| C11B-C12B-C13B | 119.98(10) | C11B-C12B-H12B | 120.9(8)   |
| C13B-C12B-H12B | 119.1(8)   | C12B-C13B-C8B  | 121.26(10) |
| C12B-C13B-N1B  | 118.82(9)  | C8B-C13B-N1B   | 119.93(9)  |
| O1B-C14B-H14D  | 111.1(9)   | O1B-C14B-H14E  | 102.6(9)   |
| H14D-C14B-H14E | 109.7(13)  | O1B-C14B-H14F  | 110.0(9)   |
| H14D-C14B-H14F | 109.6(13)  | H14E-C14B-H14F | 113.8(13)  |
| C2B-C15B-H15D  | 109.1(9)   | C2B-C15B-H15E  | 110.5(9)   |
| H15D-C15B-H15E | 106.8(12)  | C2B-C15B-H15F  | 109.4(9)   |
| H15D-C15B-H15F | 111.5(12)  | H15E-C15B-H15F | 109.6(13)  |
| O4B-C16B-H16D  | 105.3(9)   | O4B-C16B-H16E  | 110.7(8)   |

|                |           |                |           |
|----------------|-----------|----------------|-----------|
| H16D-C16B-H16E | 109.4(12) | O4B-C16B-H16F  | 111.7(8)  |
| H16D-C16B-H16F | 110.7(12) | H16E-C16B-H16F | 109.1(12) |



**Supplementary Table 10. Torsion angles (°) for  $\alpha$ -methyl- $\beta$ -hydroxylactam 54.**

|                    |             |                    |             |
|--------------------|-------------|--------------------|-------------|
| C9A-C10A-O4A-C16A  | -1.47(15)   | C9B-C10B-O4B-C16B  | 3.84(15)    |
| C11A-C10A-O4A-C16A | 179.15(9)   | C11B-C10B-O4B-C16B | -175.90(9)  |
| C1A-N1A-O1A-C14A   | 86.27(11)   | C1B-N1B-O1B-C14B   | 86.16(11)   |
| C13A-N1A-O1A-C14A  | -100.05(10) | C13B-N1B-O1B-C14B  | -103.30(10) |
| O2A-C1A-C2A-C15A   | -63.04(14)  | O2B-C1B-C2B-C15B   | -63.10(13)  |
| N1A-C1A-C2A-C15A   | 118.19(11)  | N1B-C1B-C2B-C15B   | 118.78(10)  |
| H3OA-O3A-C3A-C4A   | -80.6(15)   | H3OB-O3B-C3B-C4B   | -75.4(12)   |
| H3OA-O3A-C3A-C2A   | 45.2(15)    | H3OB-O3B-C3B-C2B   | 49.8(12)    |

**Supplementary Table 11. Anisotropic atomic displacement parameters ( $\text{\AA}^2$ ) for  $\alpha$ -methyl- $\beta$ -hydroxylactam 54.** The anisotropic atomic displacement factor exponent takes the form:  $-2\pi^2 [h^2 a^{*2} U_{11} + \dots + 2 h k a^* b^* U_{12}]$

|      | $U_{11}$  | $U_{22}$  | $U_{33}$  | $U_{23}$   | $U_{13}$   | $U_{12}$   |
|------|-----------|-----------|-----------|------------|------------|------------|
| O1A  | 0.0213(4) | 0.0199(4) | 0.0159(4) | -0.0030(3) | -0.0012(3) | -0.0005(3) |
| O2A  | 0.0245(4) | 0.0356(5) | 0.0253(4) | -0.0076(4) | 0.0096(3)  | -0.0136(4) |
| O3A  | 0.0290(5) | 0.0425(5) | 0.0272(4) | -0.0066(4) | 0.0167(4)  | -0.0118(4) |
| O4A  | 0.0229(4) | 0.0235(4) | 0.0280(4) | 0.0008(3)  | 0.0114(3)  | -0.0027(3) |
| N1A  | 0.0172(4) | 0.0190(4) | 0.0136(4) | -0.0015(3) | 0.0010(3)  | -0.0016(3) |
| C1A  | 0.0186(5) | 0.0185(5) | 0.0198(5) | -0.0039(4) | 0.0060(4)  | -0.0025(4) |
| C2A  | 0.0176(5) | 0.0251(6) | 0.0165(5) | -0.0008(4) | 0.0052(4)  | -0.0048(4) |
| C3A  | 0.0209(5) | 0.0339(6) | 0.0191(5) | -0.0065(5) | 0.0087(5)  | -0.0081(5) |
| C4A  | 0.0197(5) | 0.0300(6) | 0.0292(6) | -0.0088(5) | 0.0119(5)  | -0.0022(5) |
| C5A  | 0.0188(5) | 0.0230(6) | 0.0255(6) | -0.0084(5) | 0.0074(4)  | -0.0014(4) |
| C6A  | 0.0188(5) | 0.0178(5) | 0.0322(6) | -0.0046(5) | 0.0071(5)  | 0.0024(4)  |
| C7A  | 0.0197(5) | 0.0189(5) | 0.0228(6) | 0.0007(4)  | 0.0025(4)  | 0.0024(4)  |
| C8A  | 0.0204(5) | 0.0183(5) | 0.0114(4) | -0.0005(4) | 0.0022(4)  | 0.0022(4)  |
| C9A  | 0.0240(5) | 0.0158(5) | 0.0146(5) | 0.0004(4)  | 0.0051(4)  | 0.0001(4)  |
| C10A | 0.0210(5) | 0.0214(5) | 0.0135(5) | -0.0012(4) | 0.0058(4)  | -0.0019(4) |
| C11A | 0.0207(5) | 0.0204(5) | 0.0182(5) | -0.0010(4) | 0.0069(4)  | 0.0032(4)  |
| C12A | 0.0242(5) | 0.0154(5) | 0.0165(5) | -0.0005(4) | 0.0061(4)  | 0.0016(4)  |
| C13A | 0.0194(5) | 0.0180(5) | 0.0119(5) | -0.0011(4) | 0.0041(4)  | -0.0011(4) |
| C14A | 0.0303(6) | 0.0203(6) | 0.0206(6) | -0.0050(4) | 0.0079(5)  | -0.0032(5) |
| C15A | 0.0298(6) | 0.0322(7) | 0.0242(6) | 0.0065(5)  | 0.0077(5)  | -0.0014(5) |
| C16A | 0.0291(6) | 0.0246(6) | 0.0231(6) | 0.0031(5)  | 0.0094(5)  | -0.0064(5) |
| O1B  | 0.0254(4) | 0.0312(4) | 0.0214(4) | 0.0057(3)  | 0.0129(3)  | 0.0009(3)  |
| O2B  | 0.0329(5) | 0.0322(5) | 0.0152(4) | -0.0026(3) | 0.0031(3)  | -0.0087(4) |
| O3B  | 0.0254(4) | 0.0261(4) | 0.0241(4) | -0.0085(3) | 0.0072(3)  | -0.0090(3) |
| O4B  | 0.0179(4) | 0.0256(4) | 0.0172(4) | -0.0031(3) | 0.0023(3)  | 0.0002(3)  |
| N1B  | 0.0172(4) | 0.0253(5) | 0.0147(4) | 0.0020(4)  | 0.0065(4)  | -0.0021(4) |
| C1B  | 0.0179(5) | 0.0199(5) | 0.0168(5) | -0.0016(4) | 0.0043(4)  | 0.0005(4)  |
| C2B  | 0.0154(5) | 0.0202(5) | 0.0155(5) | -0.0026(4) | 0.0039(4)  | -0.0029(4) |
| C3B  | 0.0212(5) | 0.0203(5) | 0.0209(5) | -0.0041(4) | 0.0070(4)  | -0.0041(4) |
| C4B  | 0.0244(6) | 0.0207(6) | 0.0294(6) | -0.0072(5) | 0.0096(5)  | -0.0006(4) |
| C5B  | 0.0255(6) | 0.0207(6) | 0.0289(6) | 0.0000(5)  | 0.0071(5)  | 0.0048(5)  |
| C6B  | 0.0204(6) | 0.0275(6) | 0.0333(7) | -0.0086(5) | 0.0052(5)  | 0.0082(5)  |
| C7B  | 0.0154(5) | 0.0329(6) | 0.0260(6) | -0.0075(5) | 0.0089(5)  | -0.0001(4) |
| C8B  | 0.0150(5) | 0.0195(5) | 0.0213(5) | -0.0007(4) | 0.0081(4)  | -0.0026(4) |
| C9B  | 0.0128(5) | 0.0193(5) | 0.0215(5) | 0.0016(4)  | 0.0048(4)  | -0.0002(4) |
| C10B | 0.0173(5) | 0.0168(5) | 0.0165(5) | 0.0013(4)  | 0.0049(4)  | -0.0035(4) |
| C11B | 0.0190(5) | 0.0151(5) | 0.0210(5) | -0.0006(4) | 0.0084(4)  | -0.0003(4) |

|      | <b>U<sub>11</sub></b> | <b>U<sub>22</sub></b> | <b>U<sub>33</sub></b> | <b>U<sub>23</sub></b> | <b>U<sub>13</sub></b> | <b>U<sub>12</sub></b> |
|------|-----------------------|-----------------------|-----------------------|-----------------------|-----------------------|-----------------------|
| C12B | 0.0140(5)             | 0.0158(5)             | 0.0219(5)             | 0.0035(4)             | 0.0058(4)             | 0.0001(4)             |
| C13B | 0.0150(5)             | 0.0182(5)             | 0.0163(5)             | 0.0010(4)             | 0.0047(4)             | -0.0034(4)            |
| C14B | 0.0314(7)             | 0.0257(6)             | 0.0228(6)             | 0.0034(5)             | 0.0071(5)             | -0.0021(5)            |
| C15B | 0.0168(5)             | 0.0281(6)             | 0.0260(6)             | -0.0052(5)            | 0.0069(5)             | -0.0018(4)            |
| C16B | 0.0161(5)             | 0.0359(7)             | 0.0181(5)             | 0.0011(5)             | 0.0035(4)             | -0.0005(5)            |

**Supplementary Table 12. Hydrogen atomic coordinates and isotropic atomic displacement parameters ( $\text{\AA}^2$ ) for  $\alpha$ -methyl- $\beta$ -hydroxylactam 54.**

|      | x/a         | y/b       | z/c         | U(eq)    |
|------|-------------|-----------|-------------|----------|
| H3OA | 0.440(2)    | 0.5812(7) | 0.046(2)    | 0.066(6) |
| H2A  | 0.1075(15)  | 0.5588(4) | 0.0829(12)  | 0.015(3) |
| H3A  | 0.1888(15)  | 0.5382(4) | -0.0790(13) | 0.018(3) |
| H4A  | 0.4167(17)  | 0.5146(4) | 0.1695(14)  | 0.028(4) |
| H4B  | 0.3922(16)  | 0.4920(5) | 0.0376(14)  | 0.029(4) |
| H5A  | 0.1209(16)  | 0.4930(4) | 0.0918(13)  | 0.025(3) |
| H5B  | 0.1831(16)  | 0.4565(4) | 0.0267(14)  | 0.025(3) |
| H6A  | 0.1898(16)  | 0.4330(4) | 0.2229(13)  | 0.026(3) |
| H6B  | 0.3688(17)  | 0.4387(4) | 0.2401(14)  | 0.027(3) |
| H7A  | 0.3343(17)  | 0.4651(5) | 0.4276(15)  | 0.030(4) |
| H7B  | 0.3918(16)  | 0.5007(4) | 0.3588(13)  | 0.022(3) |
| H9A  | 0.0352(16)  | 0.4591(5) | 0.3540(13)  | 0.025(3) |
| H11A | -0.2013(16) | 0.5689(4) | 0.2932(13)  | 0.024(3) |
| H12A | 0.0228(15)  | 0.6029(4) | 0.2872(13)  | 0.022(3) |
| H14A | 0.4317(17)  | 0.6392(5) | 0.4286(15)  | 0.032(4) |
| H14B | 0.4986(15)  | 0.6181(4) | 0.5665(13)  | 0.018(3) |
| H14C | 0.3112(19)  | 0.6235(5) | 0.4890(15)  | 0.036(4) |
| H15A | 0.2096(18)  | 0.6326(5) | 0.0008(14)  | 0.032(4) |
| H15B | 0.0610(18)  | 0.6295(5) | 0.0398(16)  | 0.040(4) |
| H15C | 0.0607(18)  | 0.6088(5) | -0.0901(16) | 0.038(4) |
| H16A | -0.2359(16) | 0.4360(5) | 0.2696(15)  | 0.030(4) |
| H16B | -0.3429(18) | 0.4458(5) | 0.3520(15)  | 0.034(4) |
| H16C | -0.1567(17) | 0.4427(4) | 0.4269(14)  | 0.026(3) |
| H3OB | 0.467(2)    | 0.7253(6) | 0.5418(19)  | 0.056(5) |
| H2B  | 0.6333(15)  | 0.7745(4) | 0.8269(13)  | 0.015(3) |
| H3B  | 0.5597(15)  | 0.7059(4) | 0.7904(13)  | 0.020(3) |
| H4C  | 0.7608(16)  | 0.7260(4) | 0.6573(14)  | 0.026(3) |
| H4D  | 0.7434(17)  | 0.6816(5) | 0.7060(14)  | 0.032(4) |
| H5C  | 0.8446(16)  | 0.7391(4) | 0.9125(14)  | 0.027(3) |
| H5D  | 0.8958(17)  | 0.6918(5) | 0.9139(15)  | 0.033(4) |
| H6C  | 1.0587(17)  | 0.7122(5) | 0.8029(15)  | 0.033(4) |
| H6D  | 1.1130(17)  | 0.7321(4) | 0.9415(15)  | 0.030(4) |
| H7C  | 0.9538(17)  | 0.7750(4) | 0.7037(14)  | 0.028(4) |
| H7D  | 1.1268(17)  | 0.7825(4) | 0.8034(14)  | 0.029(4) |
| H9B  | 1.1710(16)  | 0.8071(4) | 1.0339(13)  | 0.020(3) |

|      | <b>x/a</b> | <b>y/b</b> | <b>z/c</b> | <b>U(eq)</b> |
|------|------------|------------|------------|--------------|
| H11B | 0.8327(15) | 0.8826(4)  | 1.0634(13) | 0.023(3)     |
| H12B | 0.6672(16) | 0.8658(4)  | 0.8446(13) | 0.023(3)     |
| H14D | 0.6991(18) | 0.8909(5)  | 0.5904(16) | 0.037(4)     |
| H14E | 0.7286(18) | 0.8770(5)  | 0.4676(15) | 0.035(4)     |
| H14F | 0.5700(18) | 0.8623(5)  | 0.4857(15) | 0.035(4)     |
| H15D | 0.3714(18) | 0.7612(5)  | 0.7984(15) | 0.034(4)     |
| H15E | 0.3175(18) | 0.7710(5)  | 0.6474(16) | 0.035(4)     |
| H15F | 0.3888(18) | 0.8088(5)  | 0.7473(15) | 0.036(4)     |
| H16D | 1.3101(18) | 0.8592(5)  | 1.3338(16) | 0.035(4)     |
| H16E | 1.3202(17) | 0.8511(4)  | 1.1966(14) | 0.028(4)     |
| H16F | 1.2682(16) | 0.8137(5)  | 1.2648(14) | 0.030(4)     |

**Supplementary Table 13. Hydrogen bond distances (Å) and angles (°) for  $\alpha$ -methyl- $\beta$ -hydroxylactam 54.**

|                 | <b>Donor-H</b> | <b>Acceptor-H</b> | <b>Donor-Acceptor</b> | <b>Angle</b> |
|-----------------|----------------|-------------------|-----------------------|--------------|
| O3A-H3OA...O2A  | 0.86(2)        | 2.04(2)           | 2.7804(12)            | 143.4(19)    |
| C16A-H16A...O3A | 0.996(15)      | 2.546(15)         | 3.3543(15)            | 138.2(11)    |
| O3B-H3OB...O2B  | 0.90(2)        | 2.03(2)           | 2.7979(12)            | 143.3(17)    |
| C9B-H9B...O3B   | 0.961(14)      | 2.537(14)         | 3.4717(13)            | 164.4(11)    |
| C12B-H12B...O2A | 0.965(14)      | 2.282(14)         | 3.2344(13)            | 169.1(11)    |
| C14B-H14F...O2B | 0.995(16)      | 2.598(16)         | 3.1003(15)            | 111.2(11)    |

---

**I. <sup>1</sup>H-NMR AND <sup>13</sup>C-NMR SPECTRA**

|                                                                                                                                                                                                                                                                                   |             |
|-----------------------------------------------------------------------------------------------------------------------------------------------------------------------------------------------------------------------------------------------------------------------------------|-------------|
| <b>1. Synthesis of olefin-containing benzannulated medium-ring lactams</b>                                                                                                                                                                                                        | <b>S96</b>  |
| a. Grignard addition products <b>S7</b>                                                                                                                                                                                                                                           | S96         |
| b. Sakurai-type allylation products <b>S8</b>                                                                                                                                                                                                                                     | S98         |
| c. Hydroboration–oxidation products <b>S9</b>                                                                                                                                                                                                                                     | S102        |
| d. <i>N</i> -methoxyamide substrates <b>1</b>                                                                                                                                                                                                                                     | S106        |
| e. Olefin-containing benzannulated medium-ring lactams <b>3</b>                                                                                                                                                                                                                   | S110        |
| <b>2. Synthesis of bicyclic ketone precursors</b>                                                                                                                                                                                                                                 | <b>S114</b> |
| a. Fluoroaryl ketones <b>S17</b> and <b>S18</b>                                                                                                                                                                                                                                   | S114        |
| b. Bromoaryl ketone <b>S21</b>                                                                                                                                                                                                                                                    | S120        |
| c. <i>N</i> -Tosylidihydroquinolinone <b>S23</b>                                                                                                                                                                                                                                  | S122        |
| d. <i>N</i> -Tosylindoloketones <b>S24</b> and <b>S25</b>                                                                                                                                                                                                                         | S123        |
| <b>3. Synthesis of ketone-containing benzannulated medium-ring lactams</b>                                                                                                                                                                                                        | <b>S125</b> |
| a. $\beta$ -Hydroxyesters <b>6a</b> , <b>S28–S56</b>                                                                                                                                                                                                                              | S125        |
| b. <i>N</i> -methoxyamide substrates <b>7a–d</b> , <b>10a–d</b> , <b>12a–c</b> , <b>14a,b</b> , <b>16</b> , <b>18</b> ,<br><b>20a,b</b> , <b>22</b> , <b>24</b> , <b>26</b> , <b>28</b> , <b>29</b> , <b>32</b> , <b>34</b> , <b>36</b> , <b>38</b> , <b>40</b>                   | S152        |
| c. Ketone-containing benzannulated medium-ring lactams <b>9a–d</b> , <b>11a–d</b> ,<br><b>13a–c</b> , <b>15a,b</b> , <b>17</b> , <b>19</b> , <b>21a,b</b> , <b>23</b> , <b>25</b> , <b>27</b> , <b>30</b> , <b>31</b> , <b>33</b> , <b>35</b> , <b>37</b> , <b>39</b> , <b>41</b> | S179        |
| <b>4. Downstream modifications of ODRE scaffolds</b>                                                                                                                                                                                                                              | <b>S206</b> |
| a. $\alpha$ -Geminal dimethylation of bromoaryl- $\beta$ -ketolactam <b>13c</b> ( <b>47</b> )                                                                                                                                                                                     | S206        |
| b. Sonogashira coupling of bromoaryl- $\beta$ -ketolactam <b>17</b> ( <b>48</b> )                                                                                                                                                                                                 | S207        |
| c. Suzuki–Miyaura couplings of bromoaryl- $\beta$ -ketolactam <b>13c</b> ( <b>49–51</b> )                                                                                                                                                                                         | S208        |
| d. Reductive cleavage of N–O bond in bromoaryl- $\beta$ -ketolactam <b>13c</b> ( <b>52</b> )                                                                                                                                                                                      | S211        |
| e. Ketone reduction in $\alpha$ -methyl- $\beta$ -ketolactam <b>53</b> ( <b>54</b> )                                                                                                                                                                                              | S212        |
| f. Reductive amination of $\alpha$ -methyl- $\beta$ -ketolactam <b>53</b> ( <b>55</b> )                                                                                                                                                                                           | S214        |
| g. Aldol–Tischenko reaction of $\alpha$ -methyl- $\beta$ -ketolactam <b>53</b> ( <b>56</b> )                                                                                                                                                                                      | S215        |





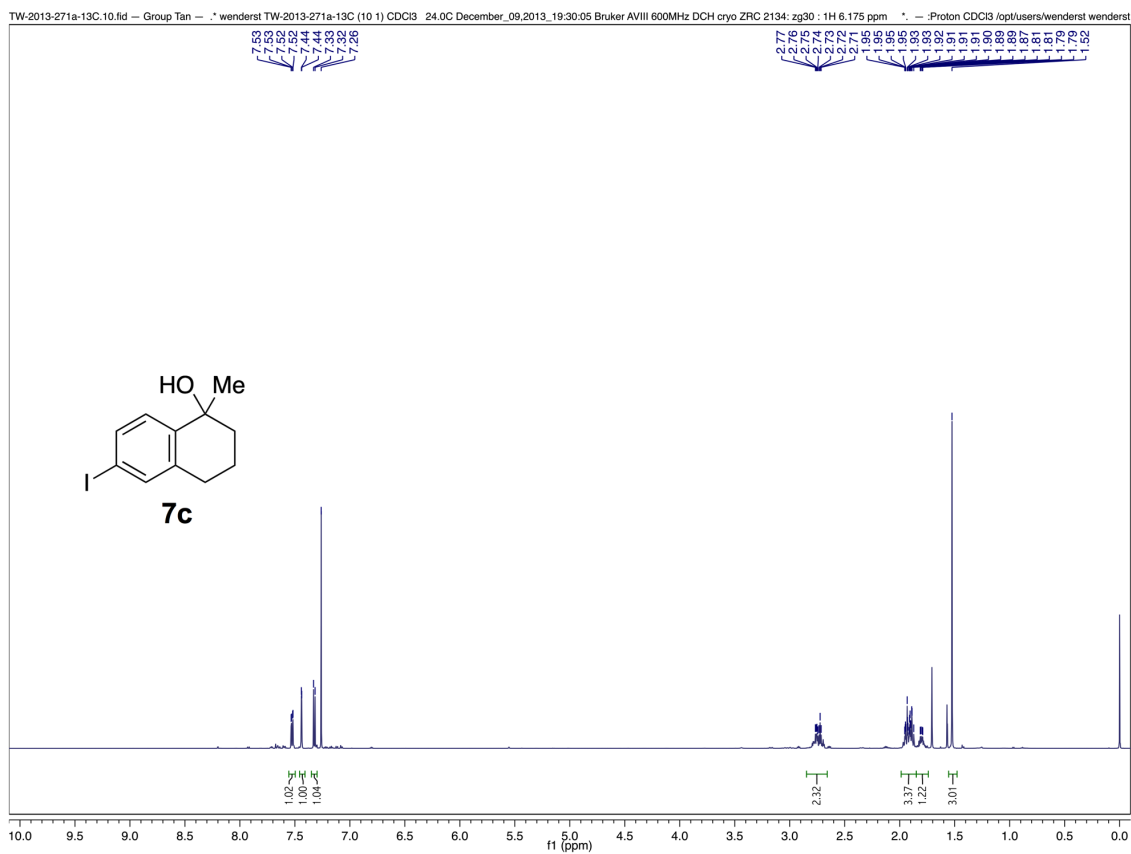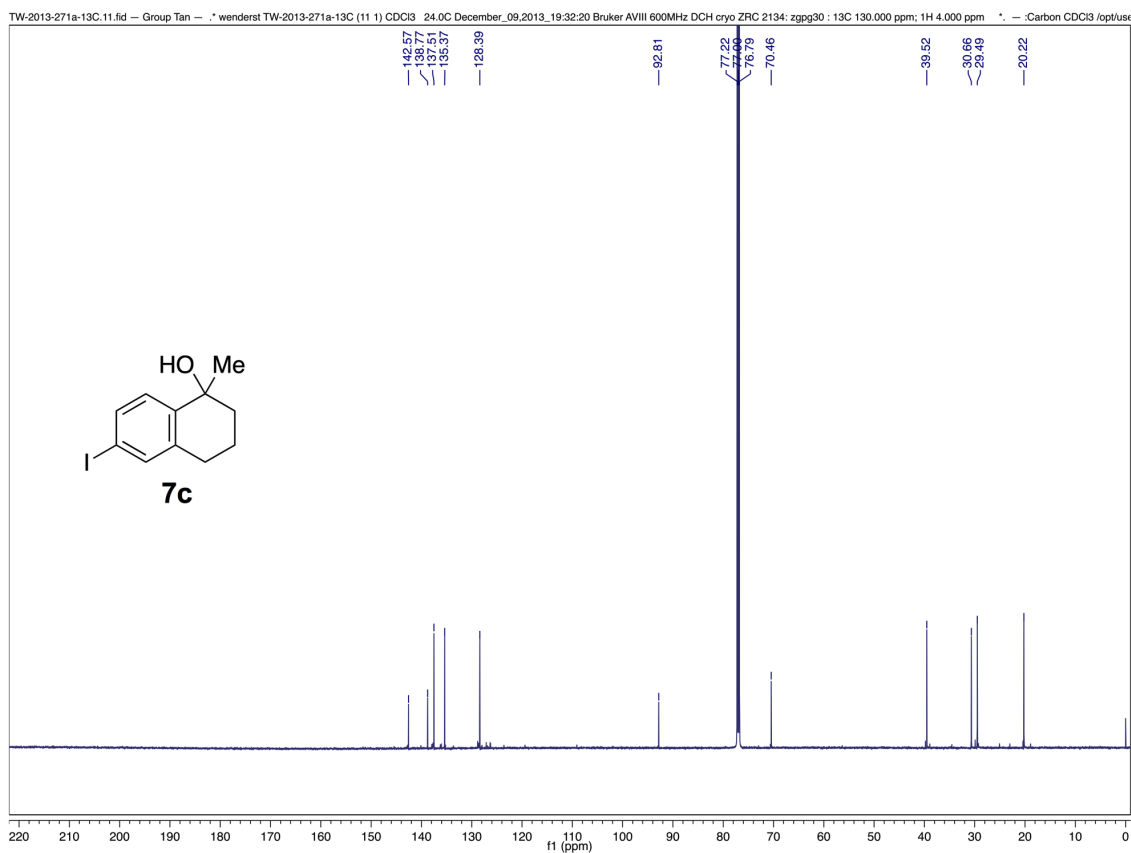

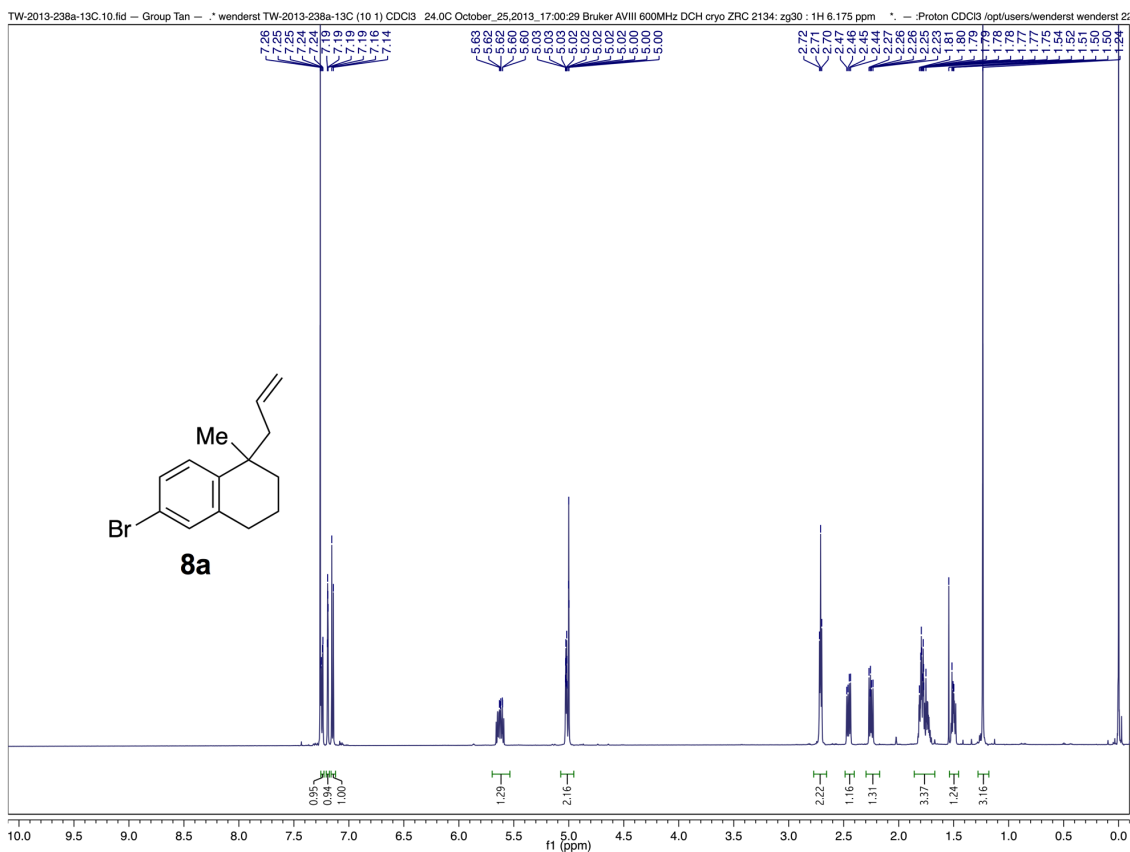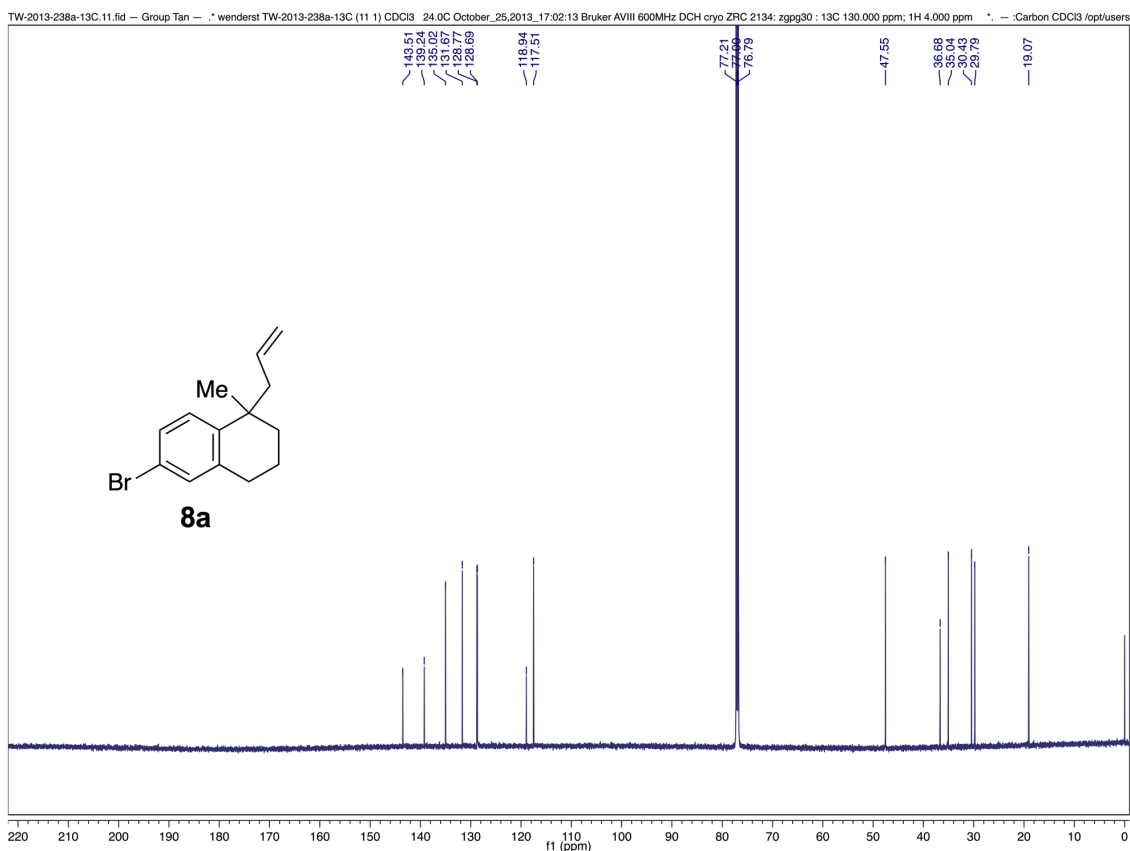

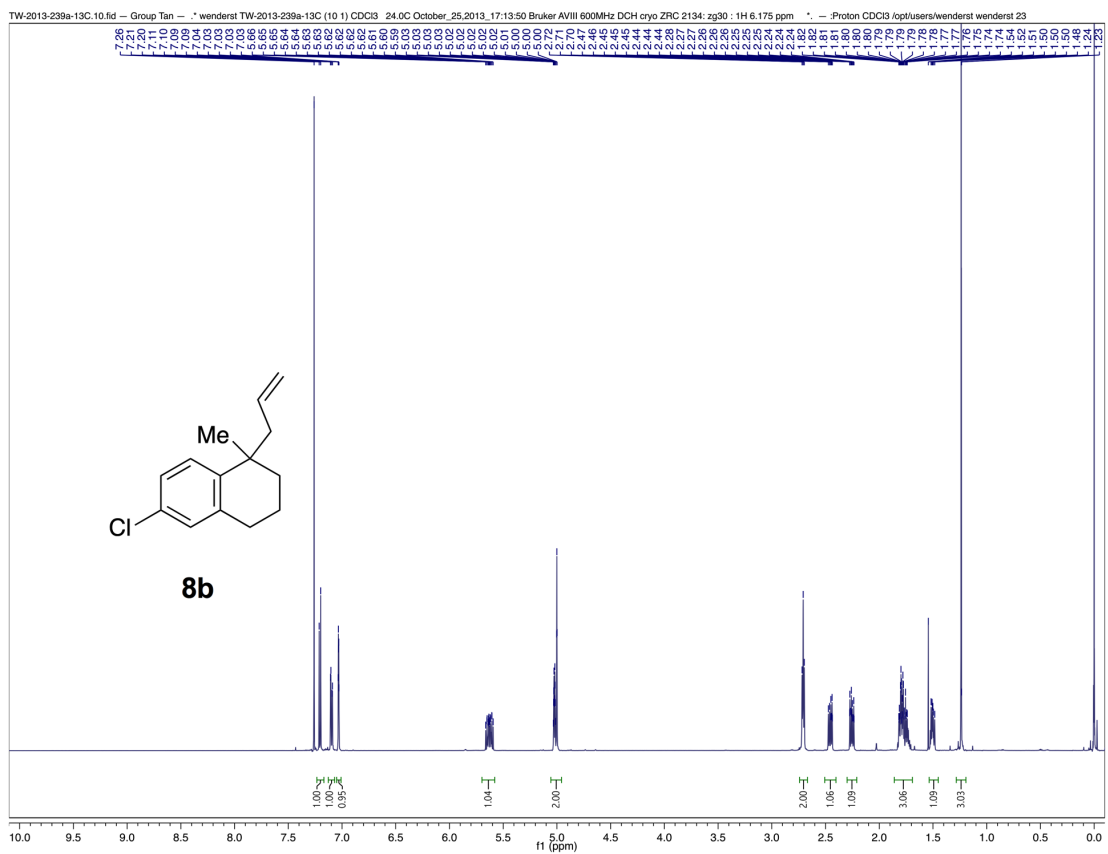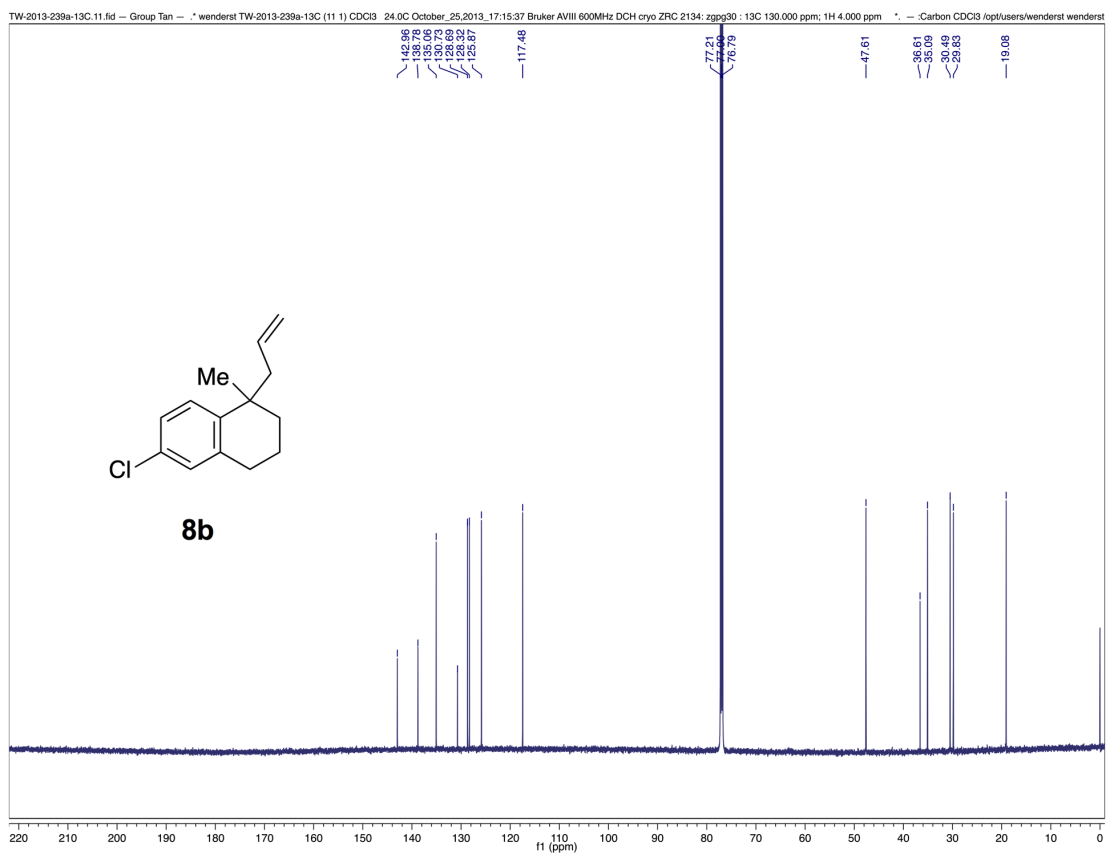

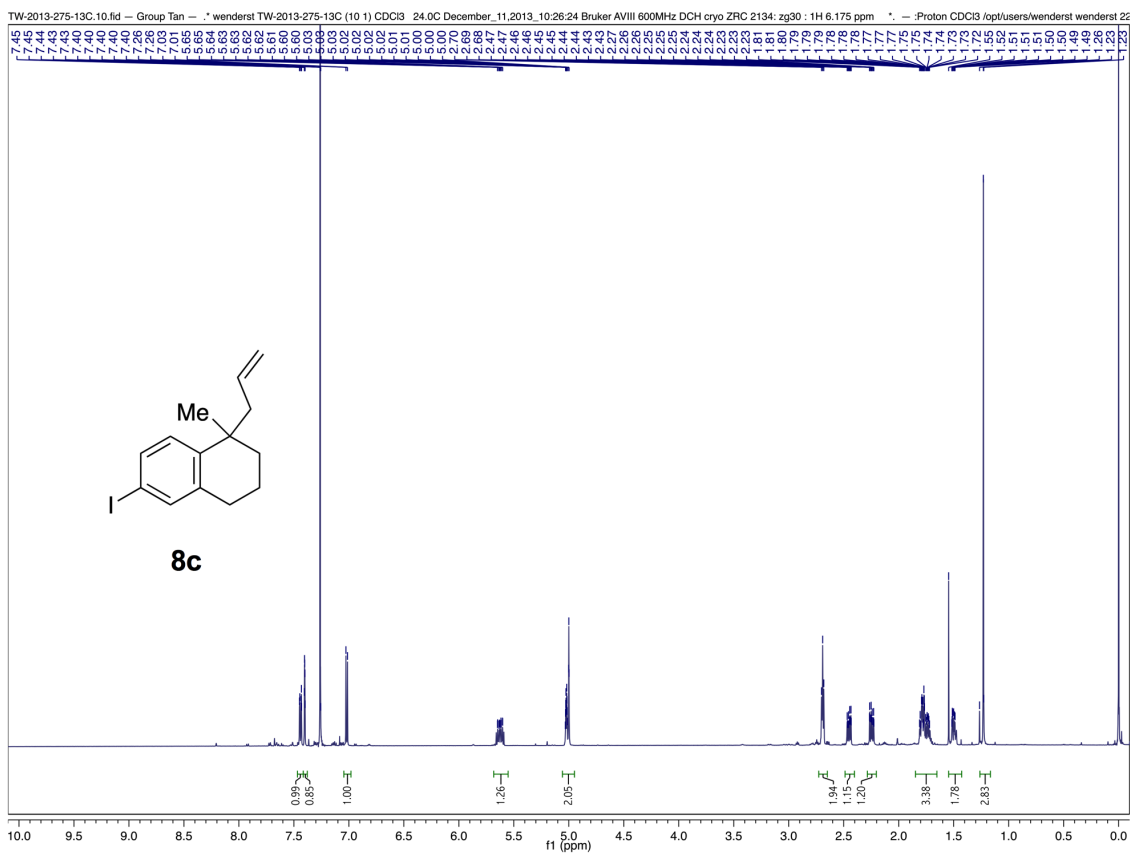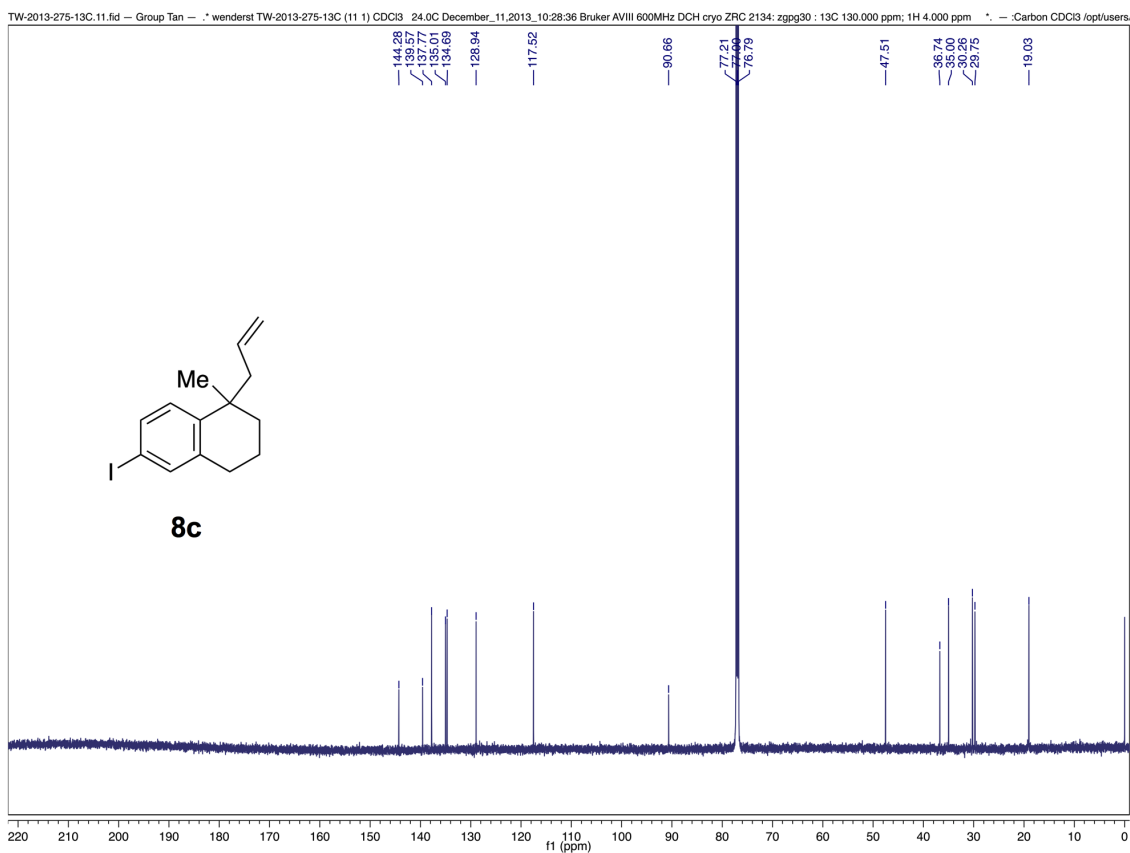

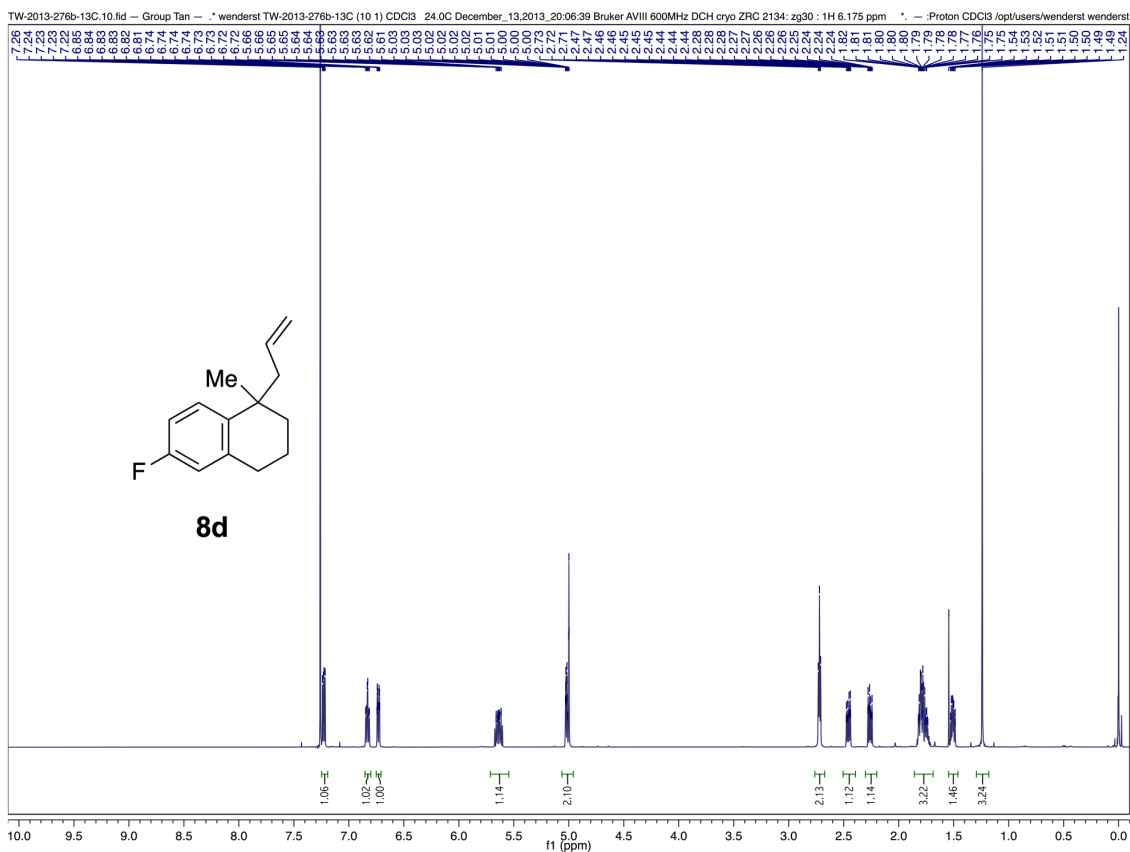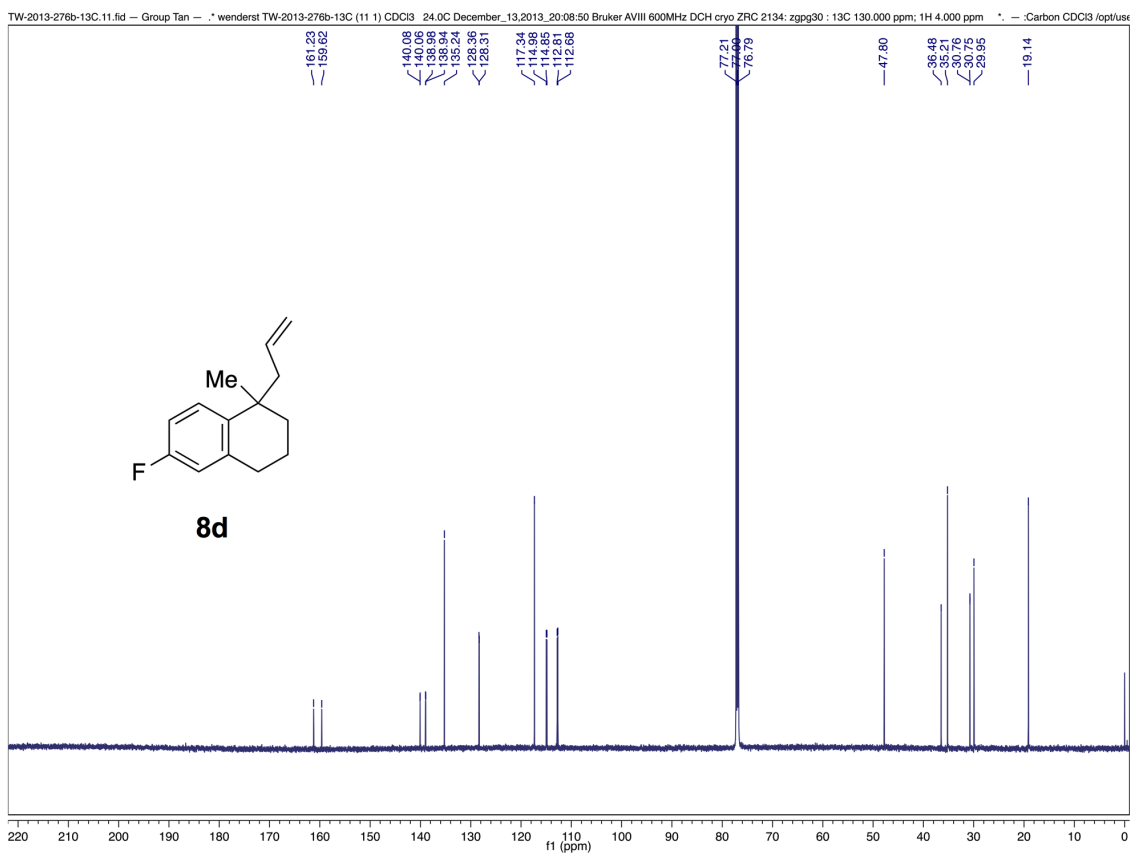

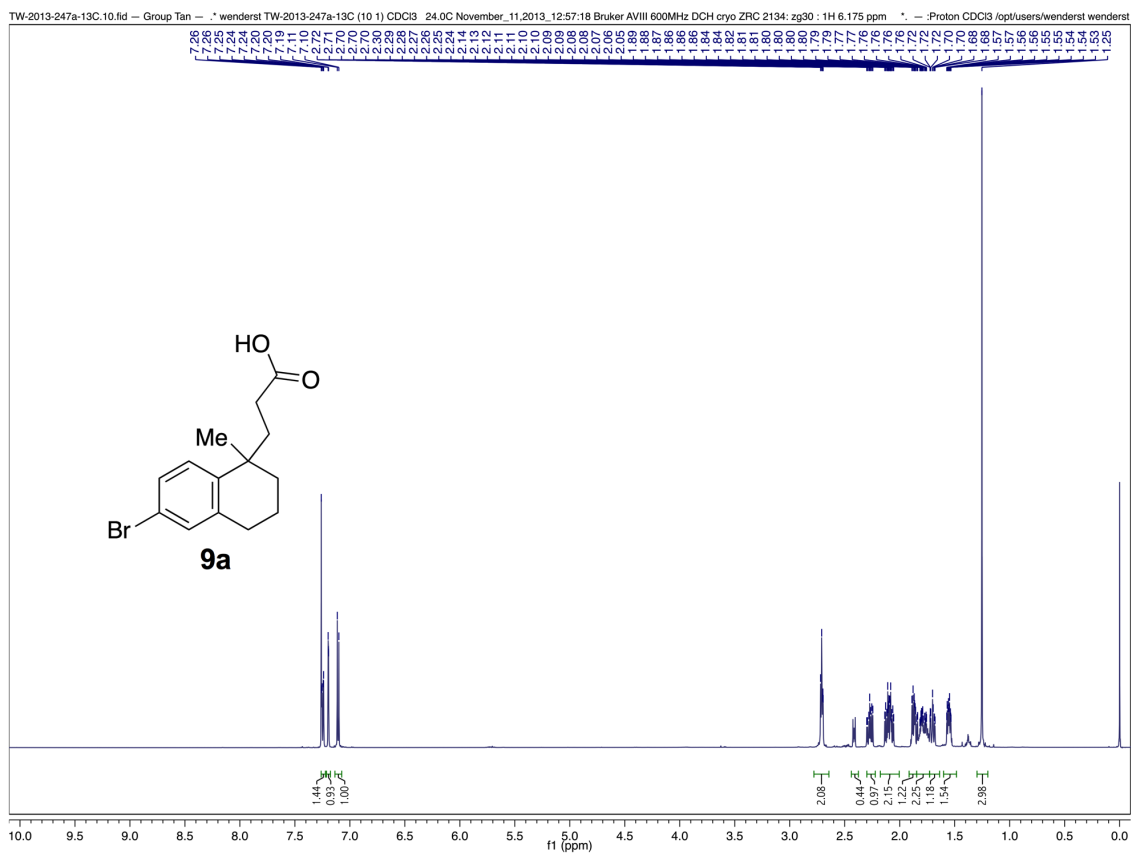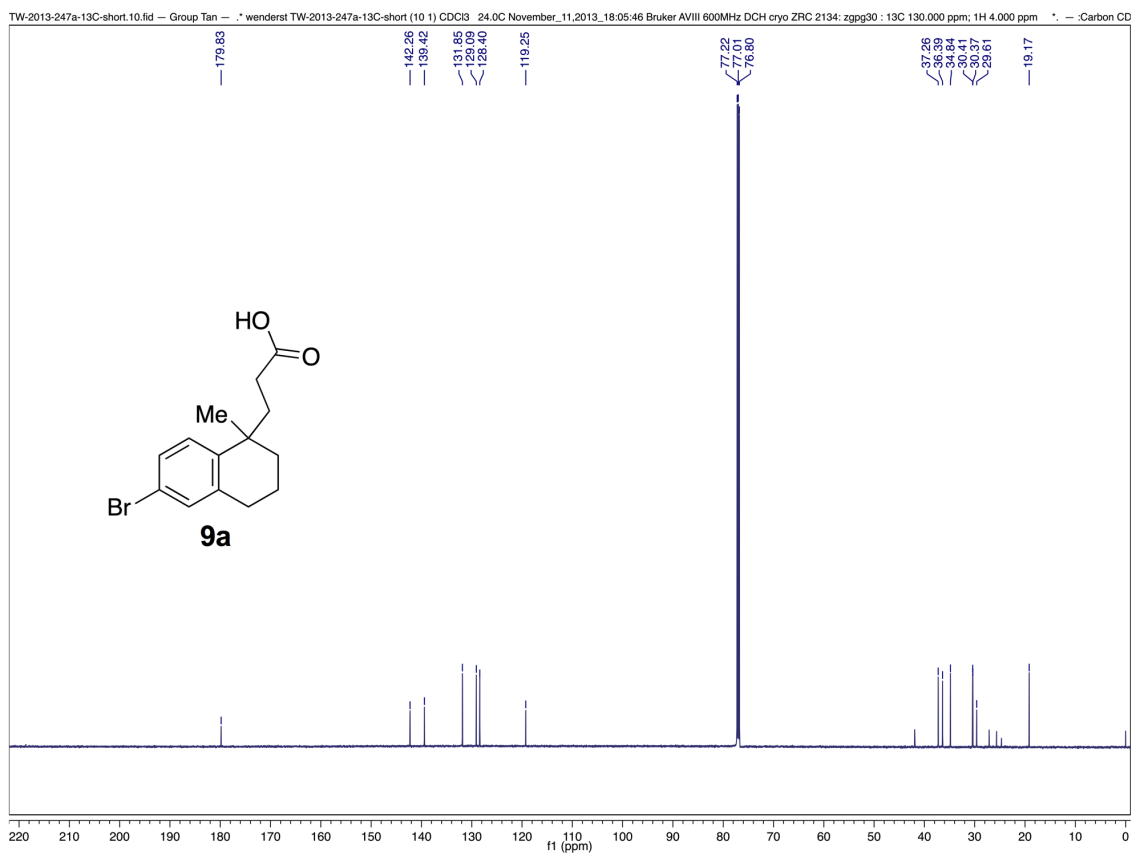

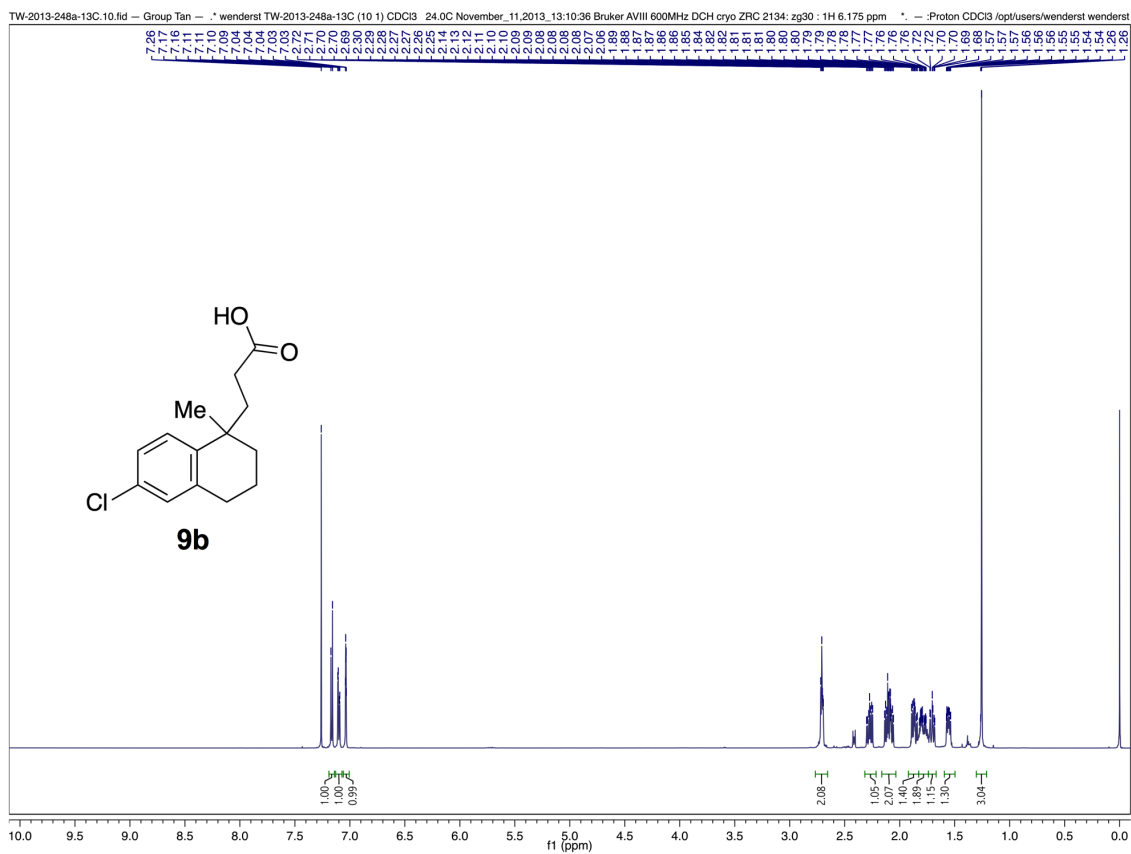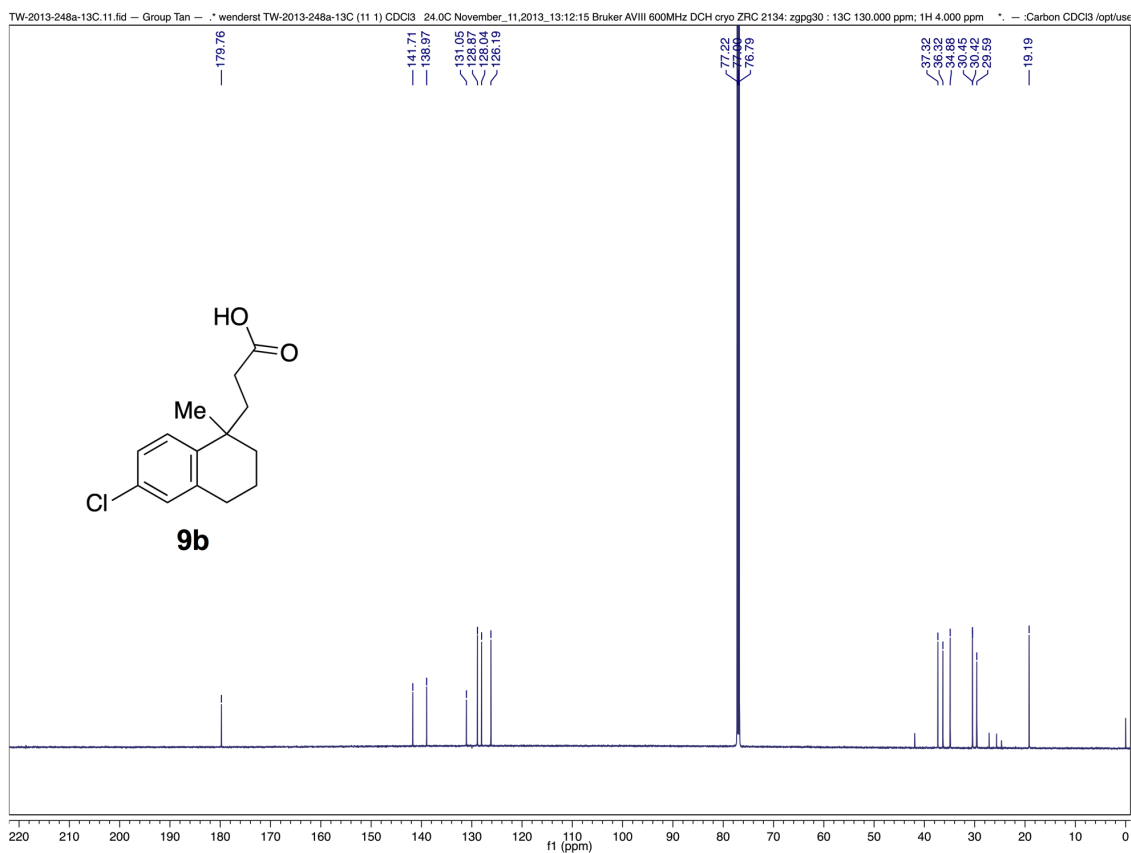

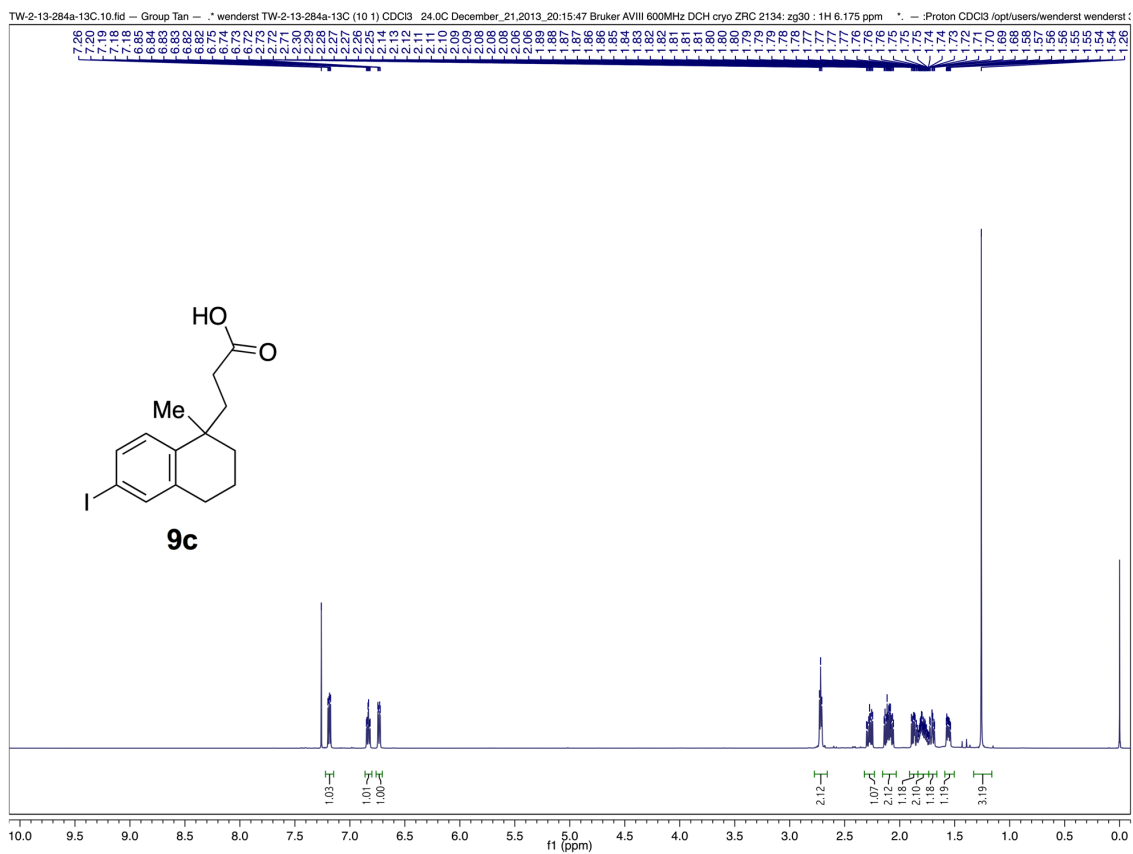















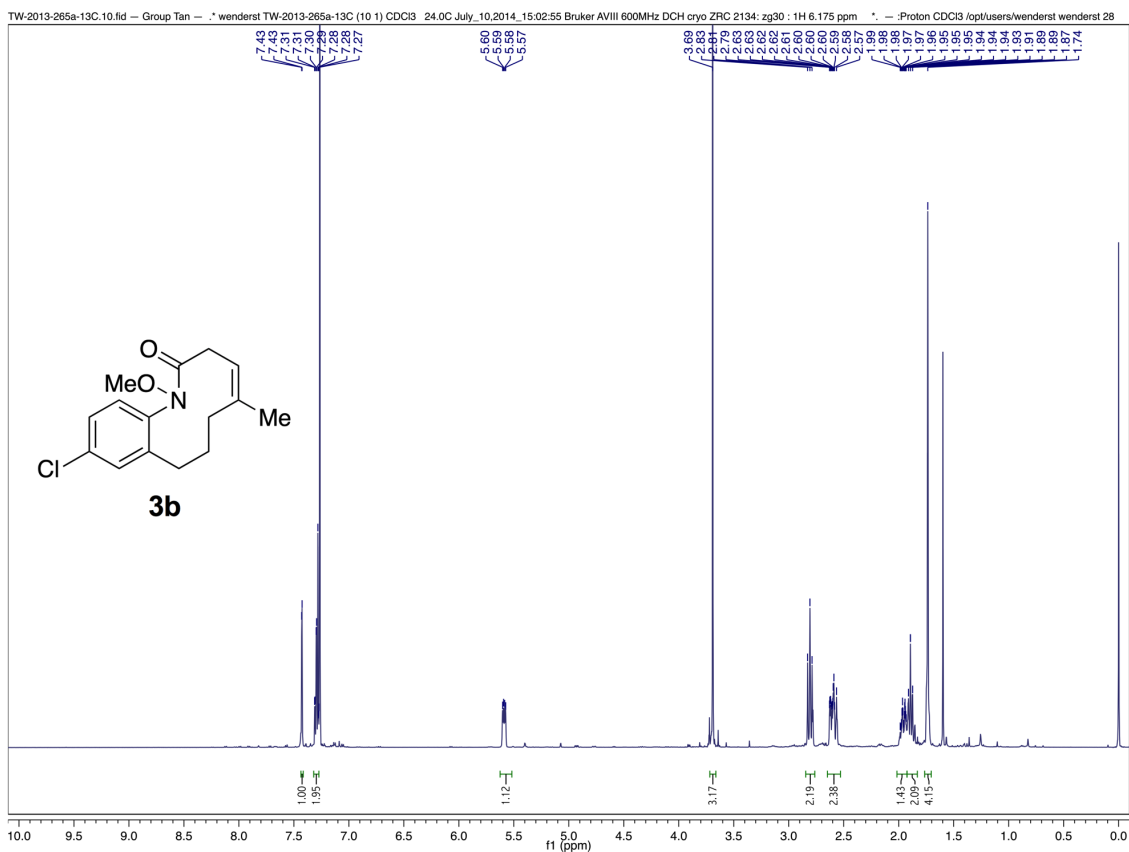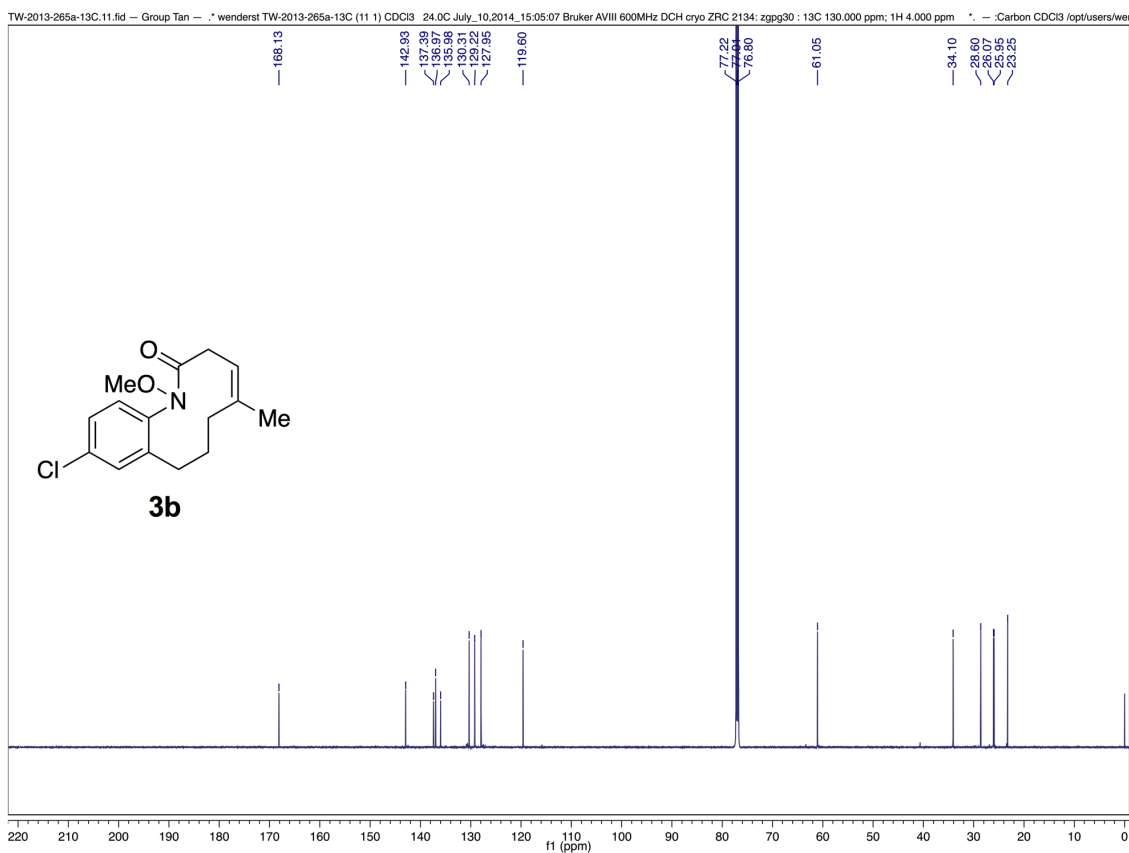

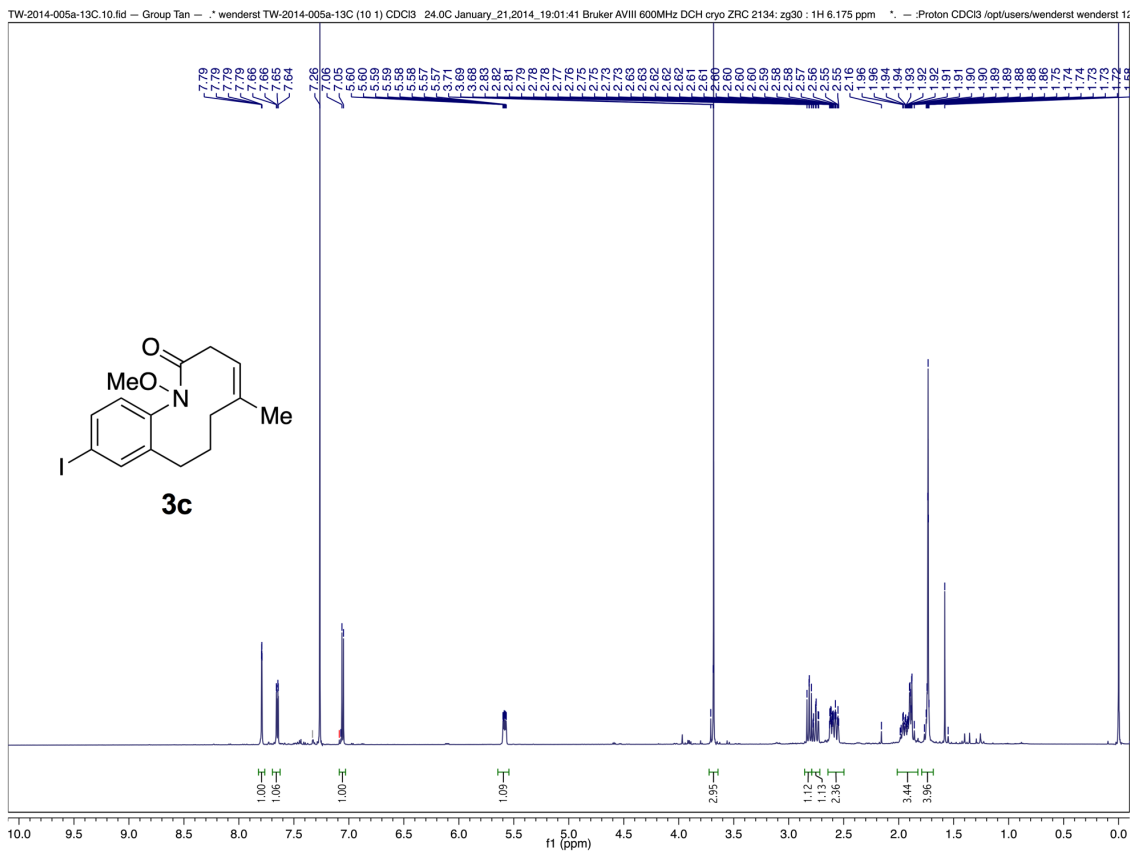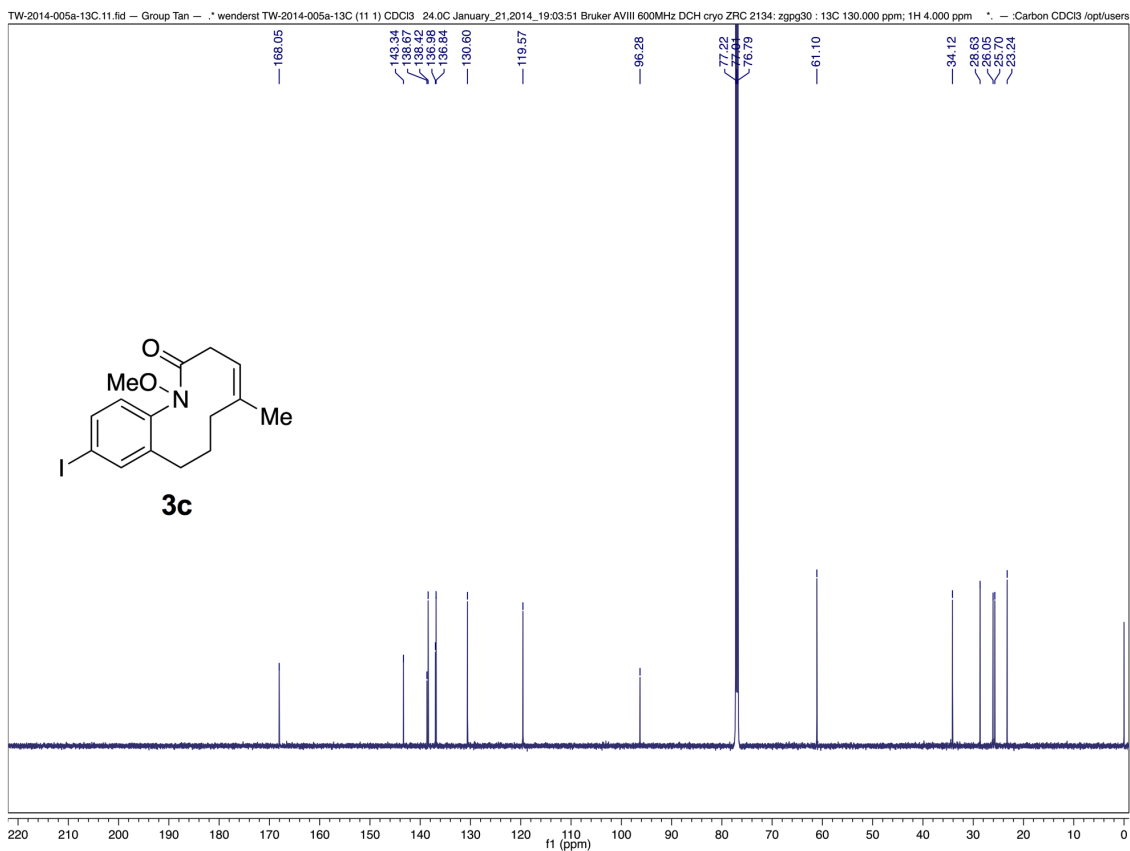



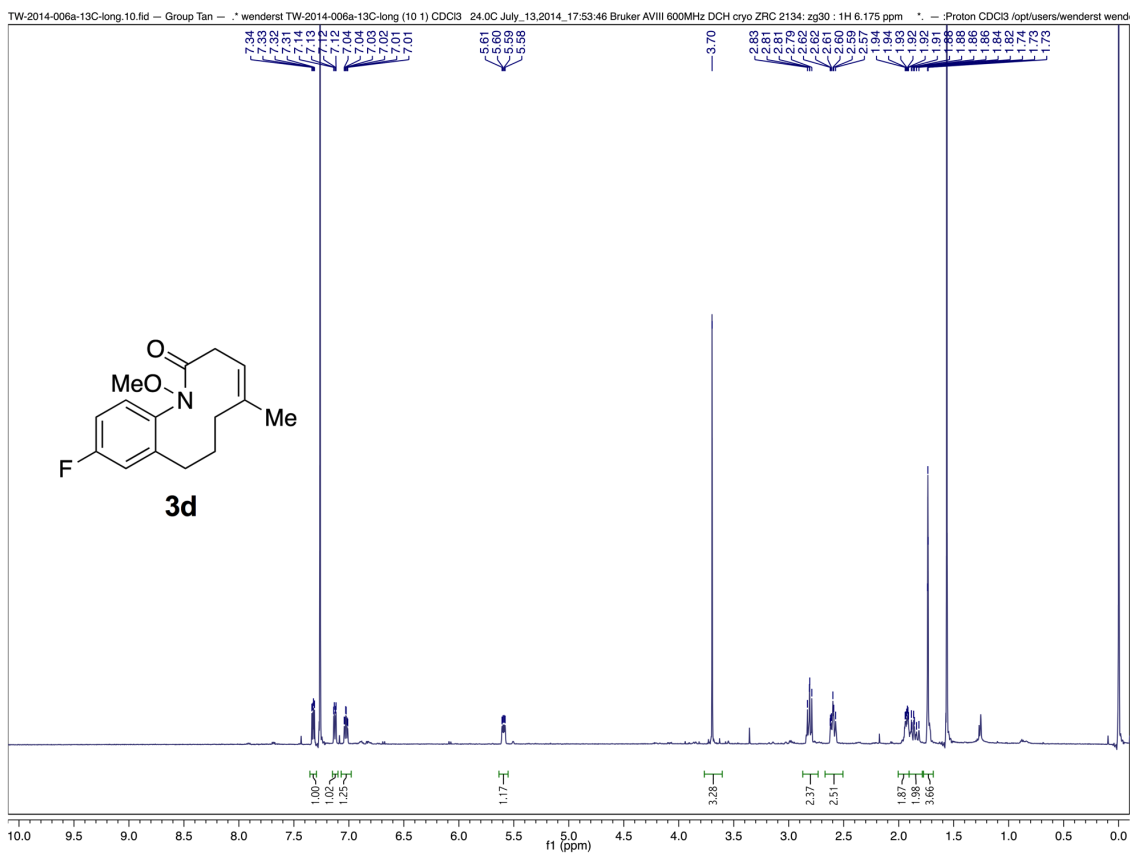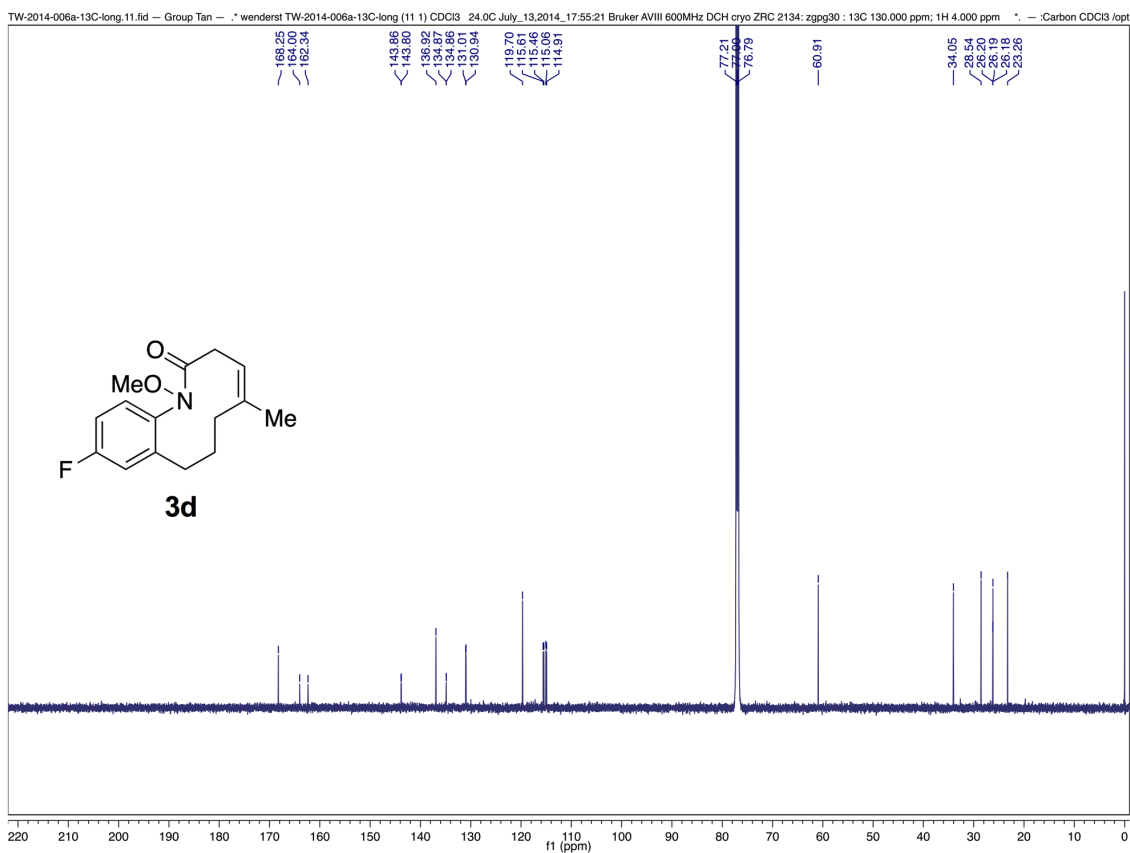



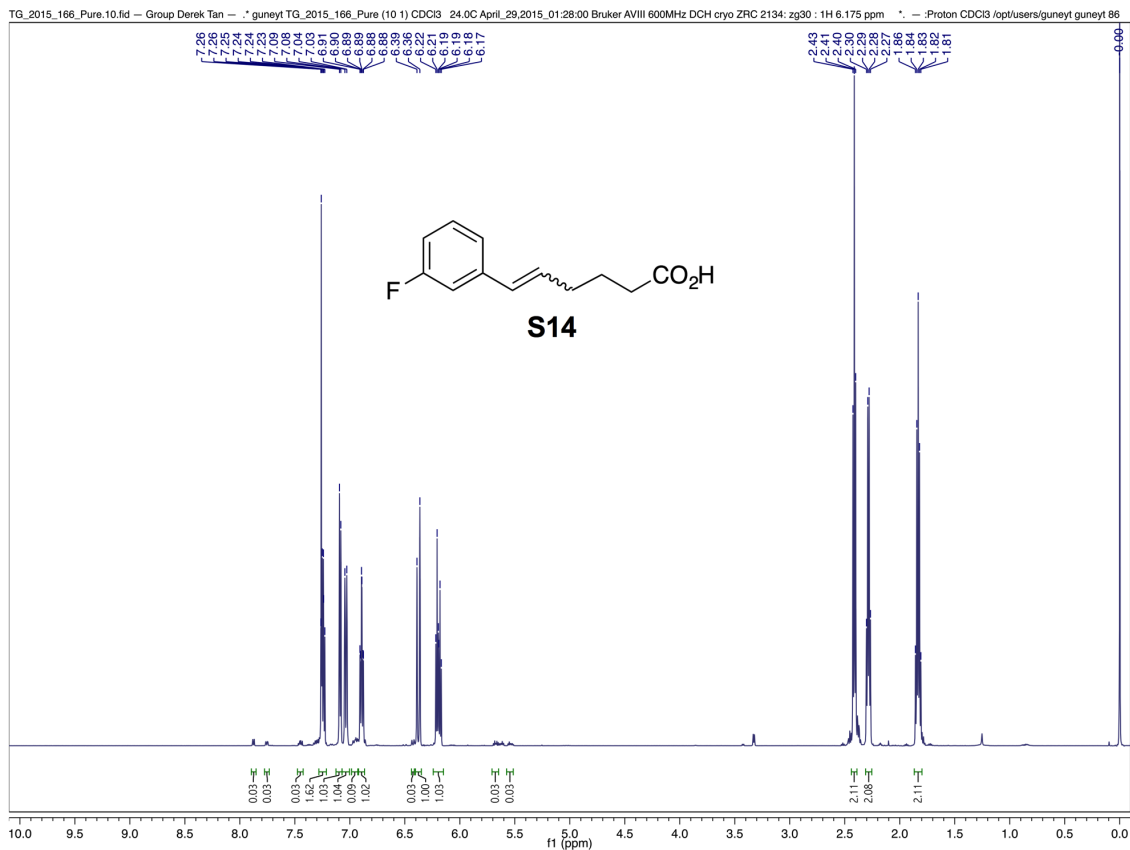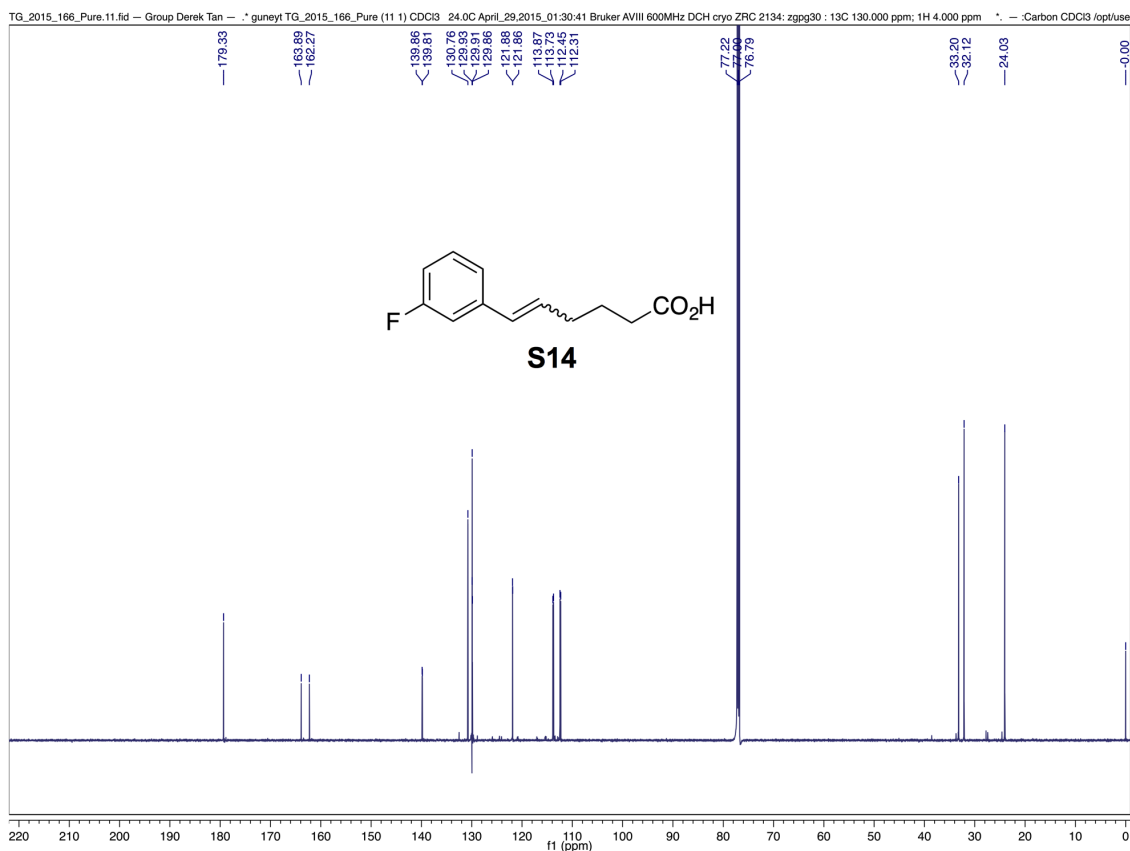

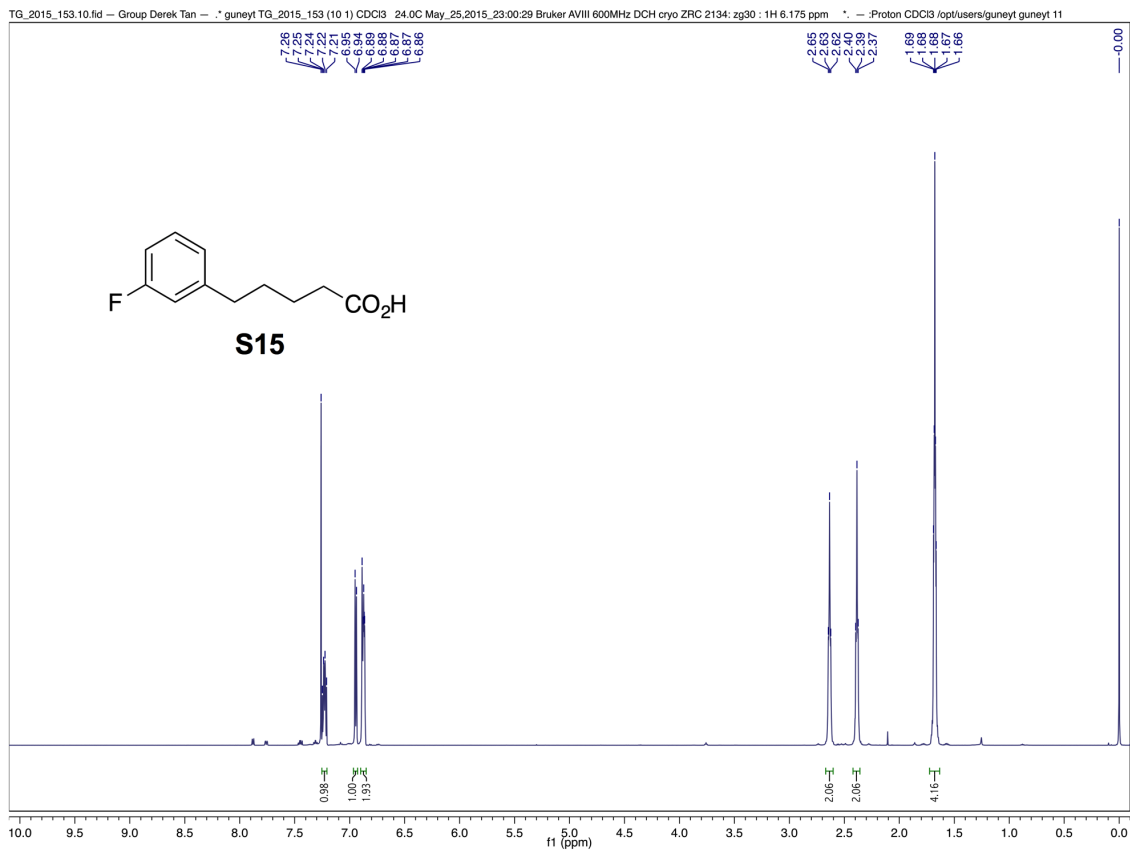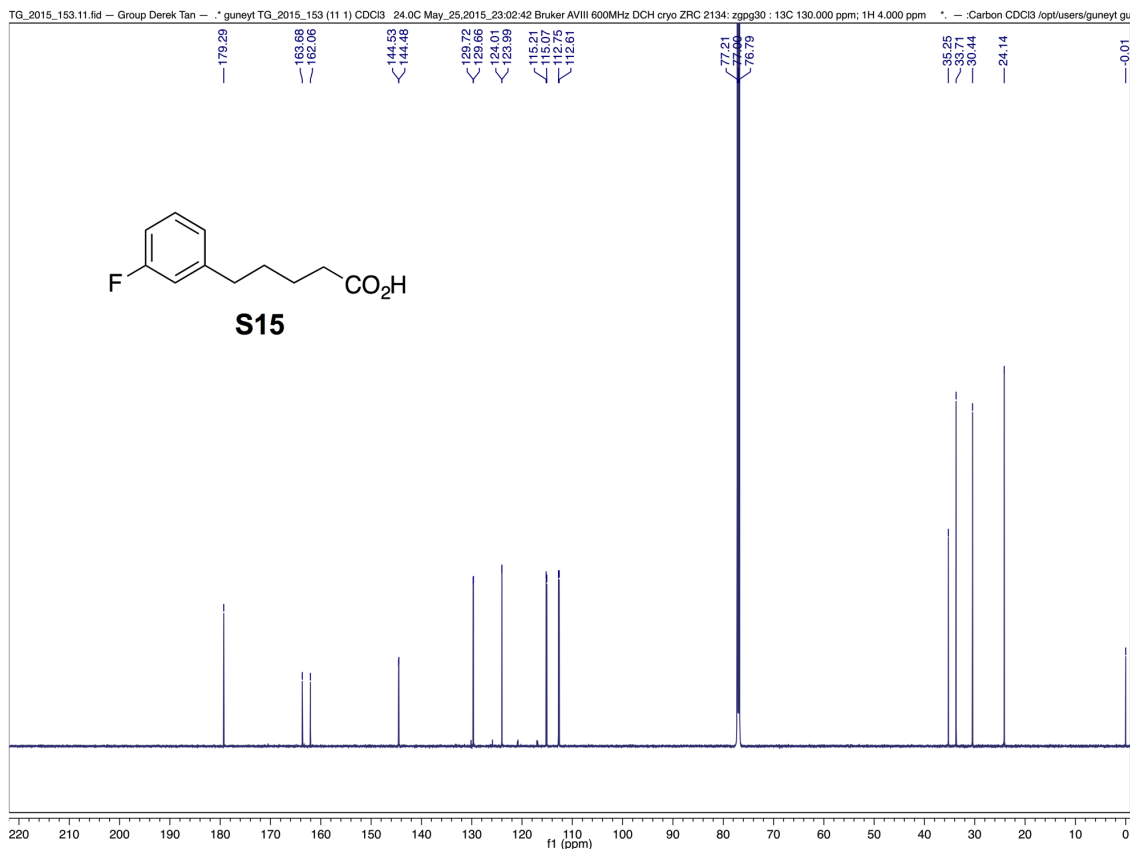

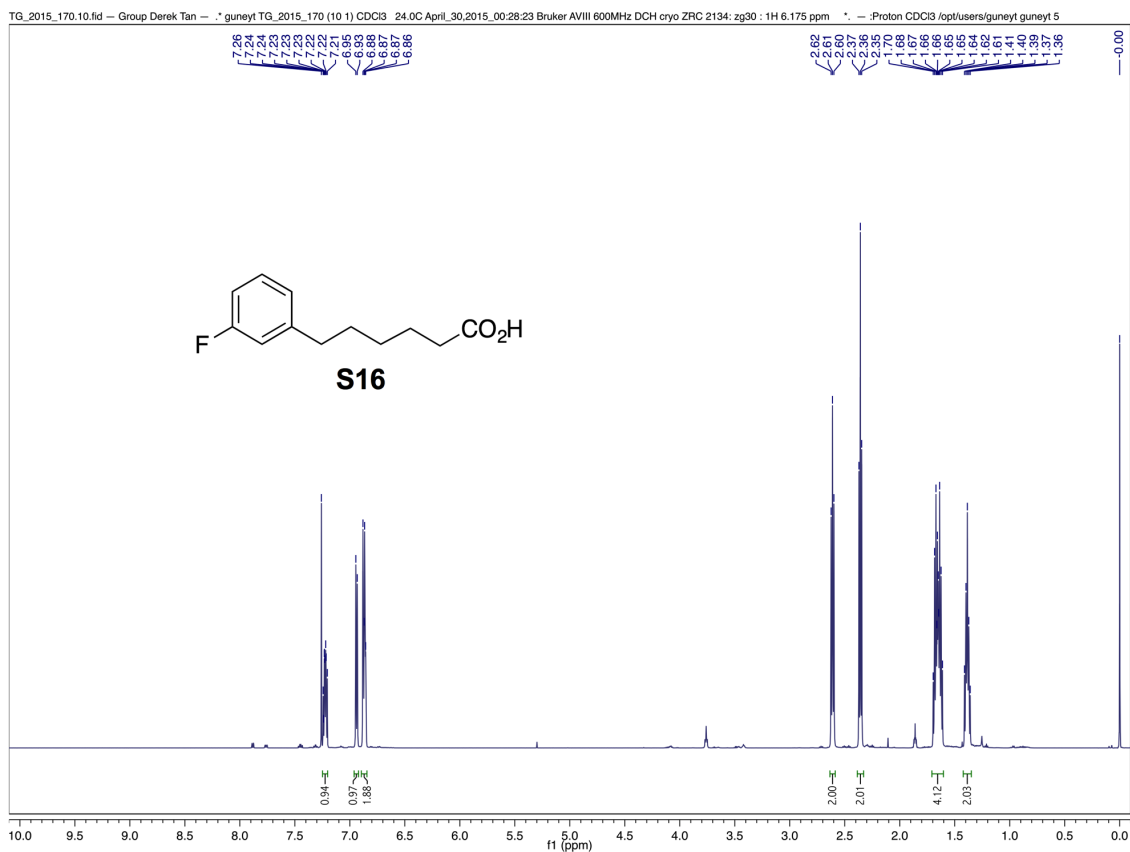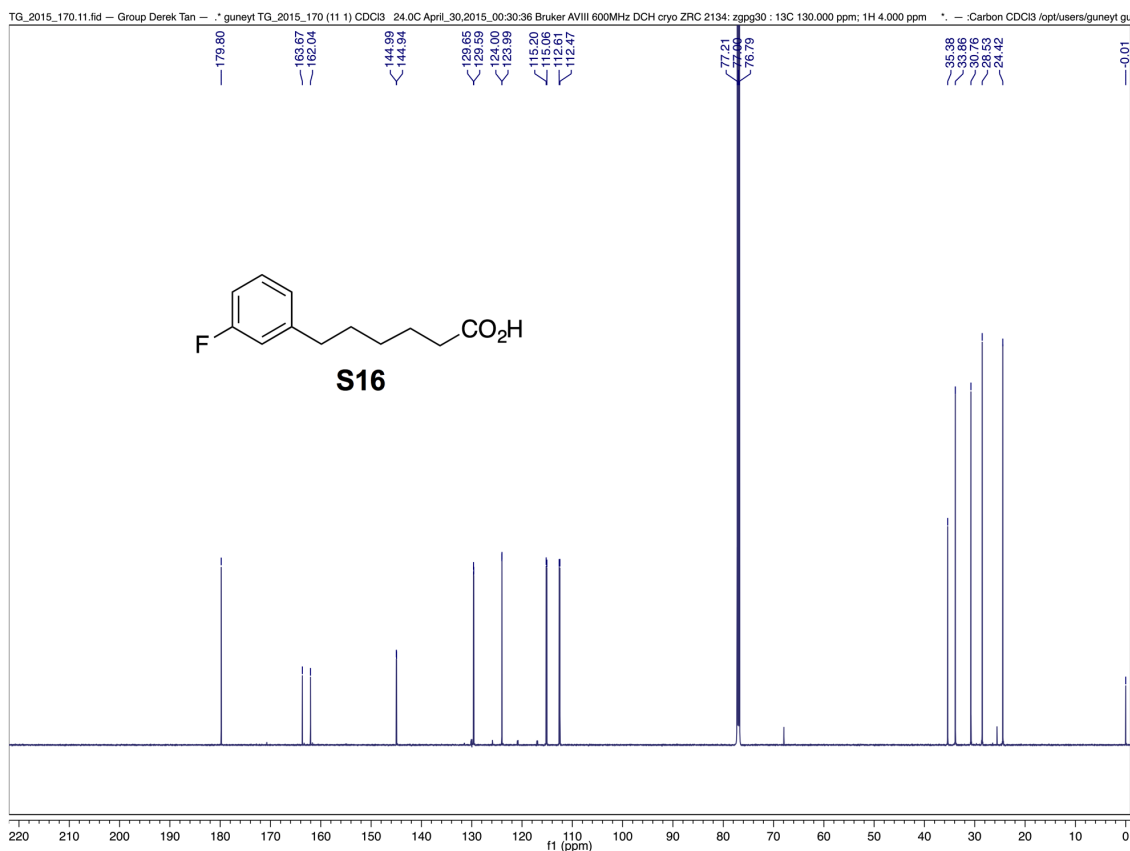

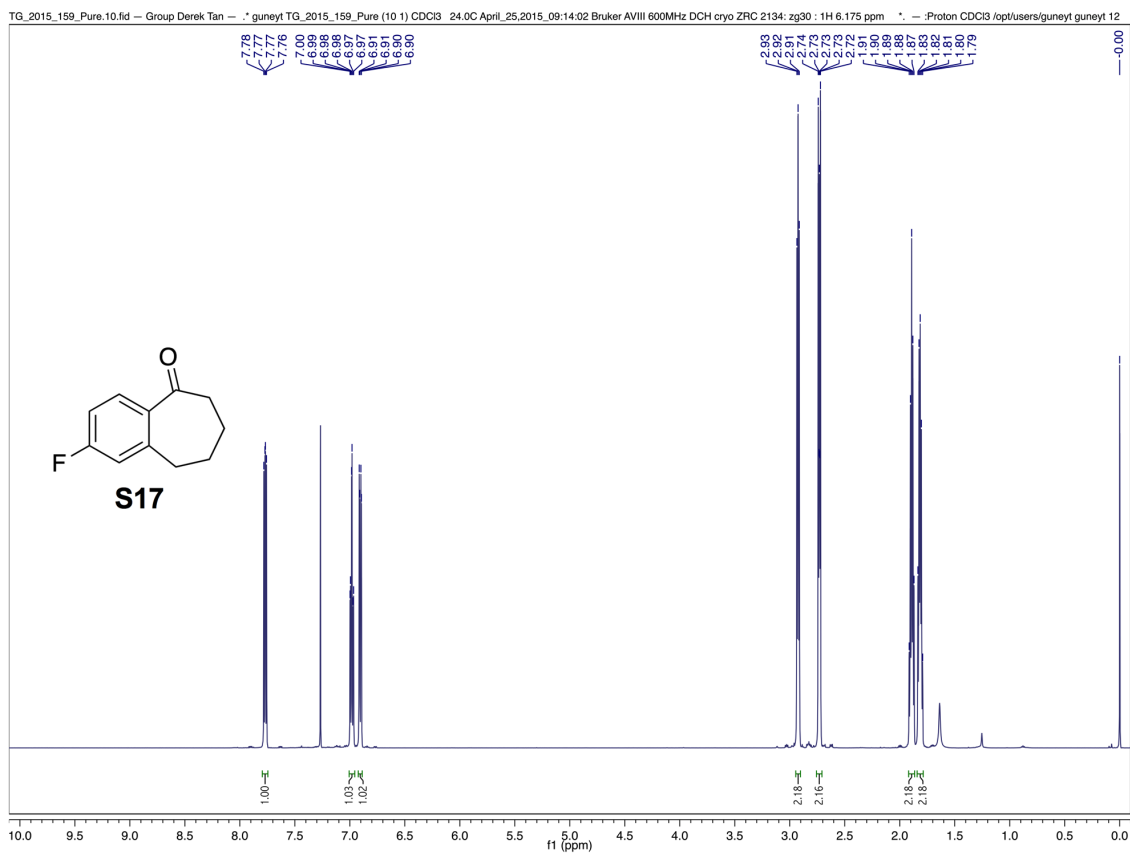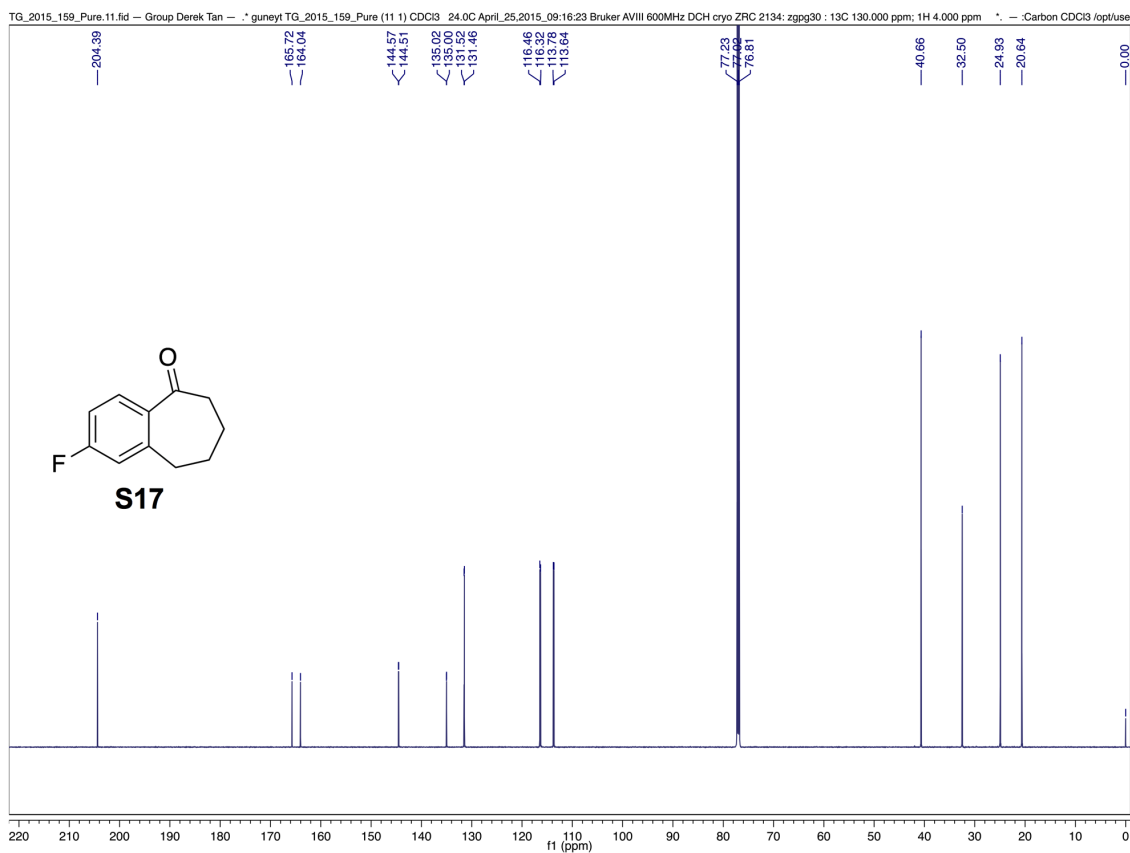

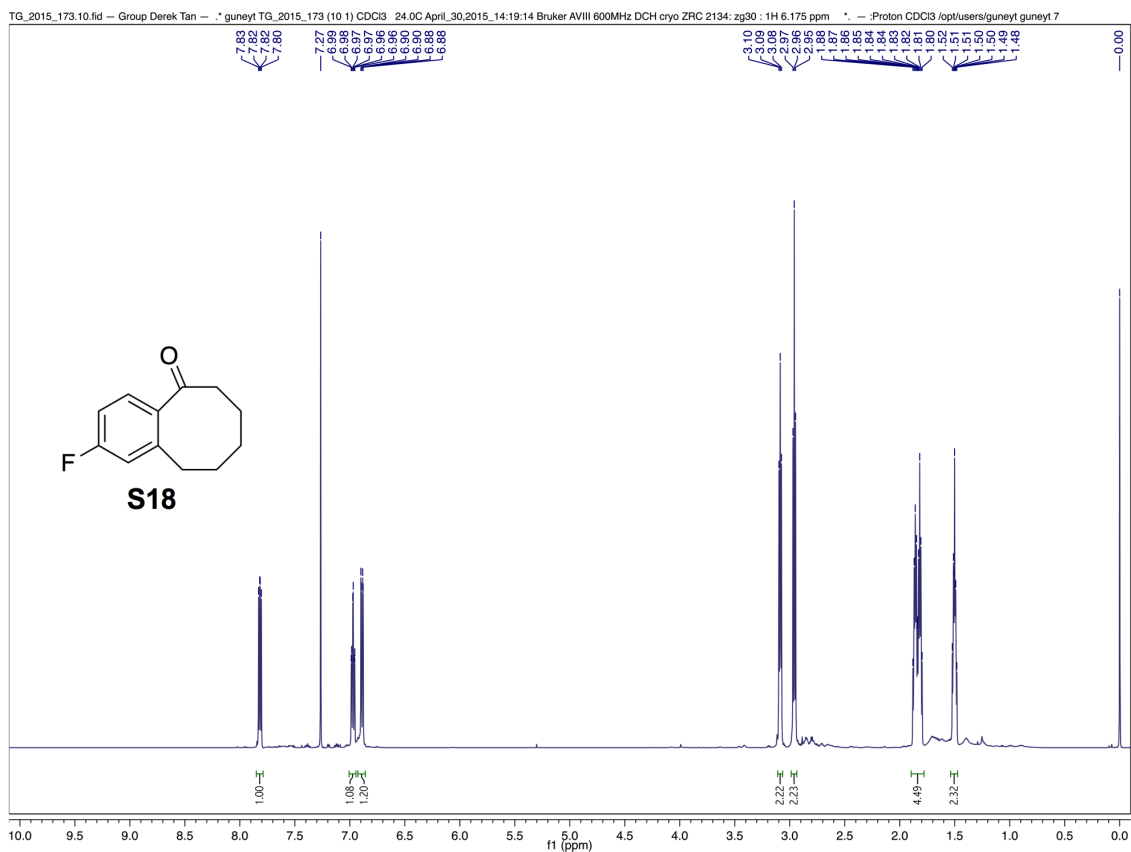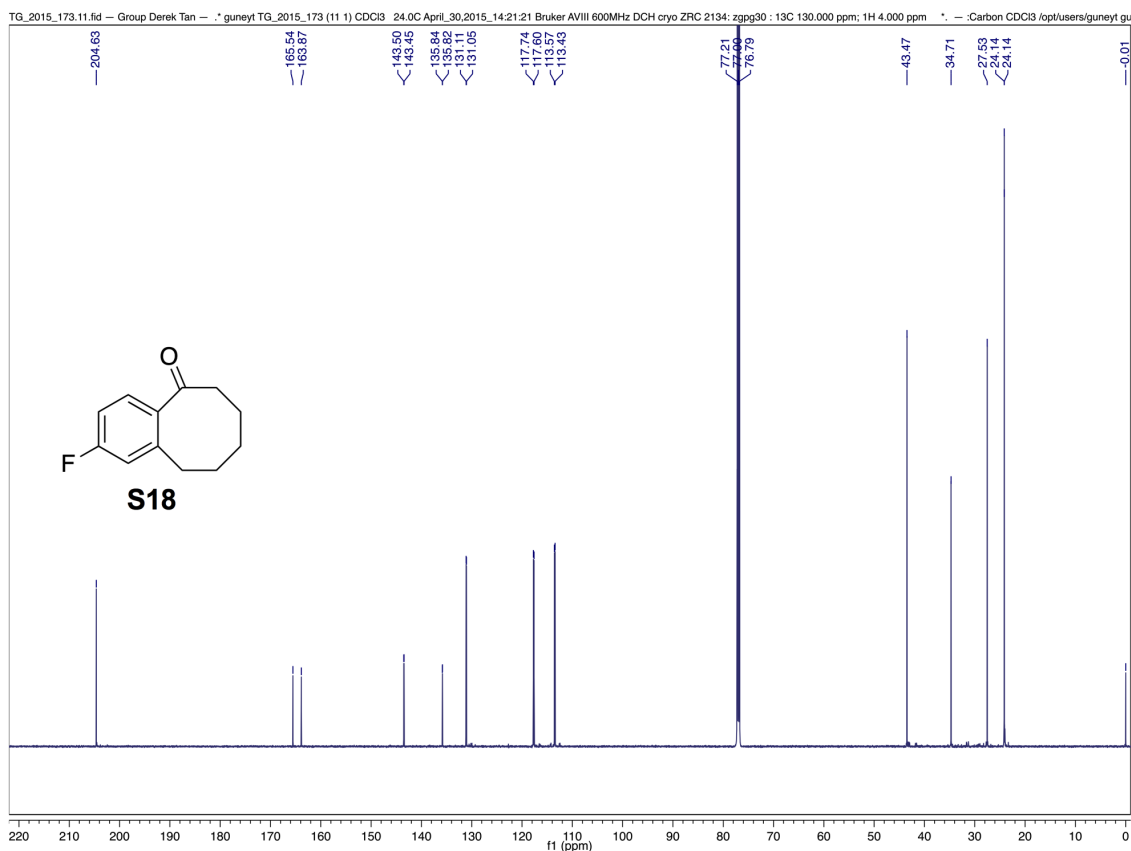

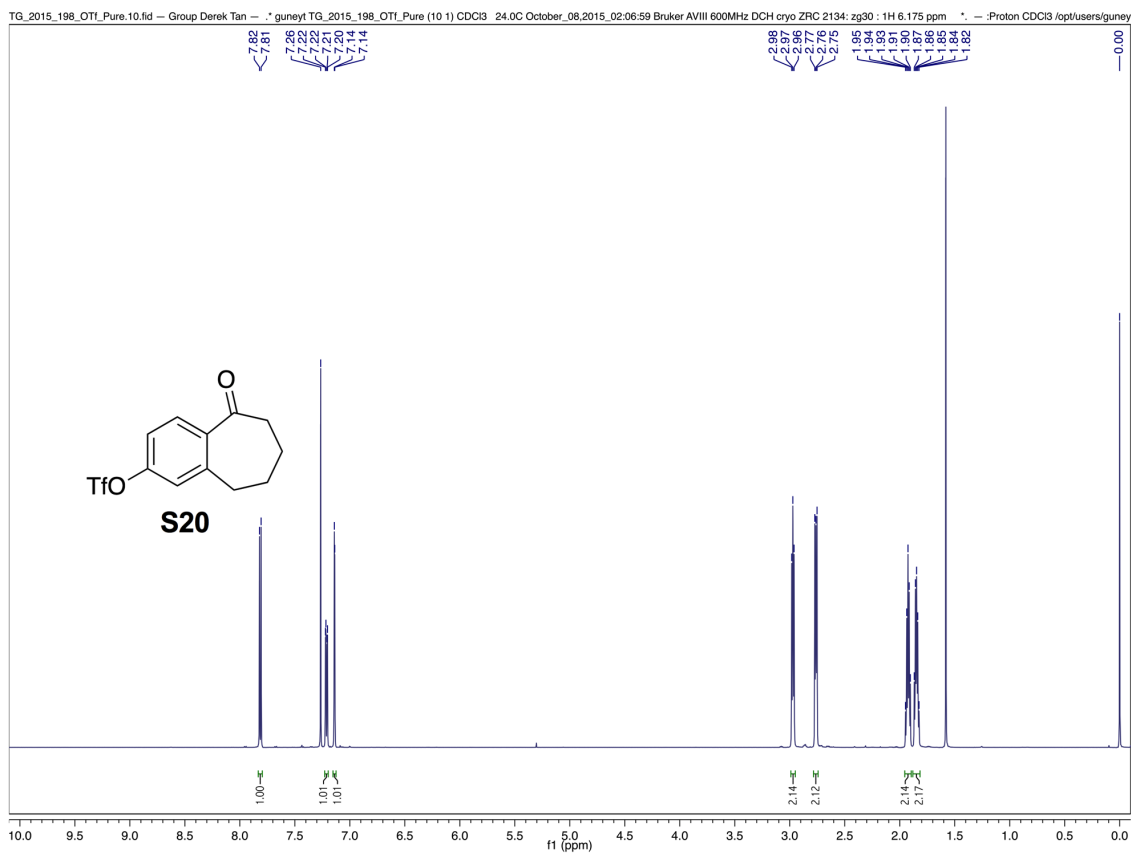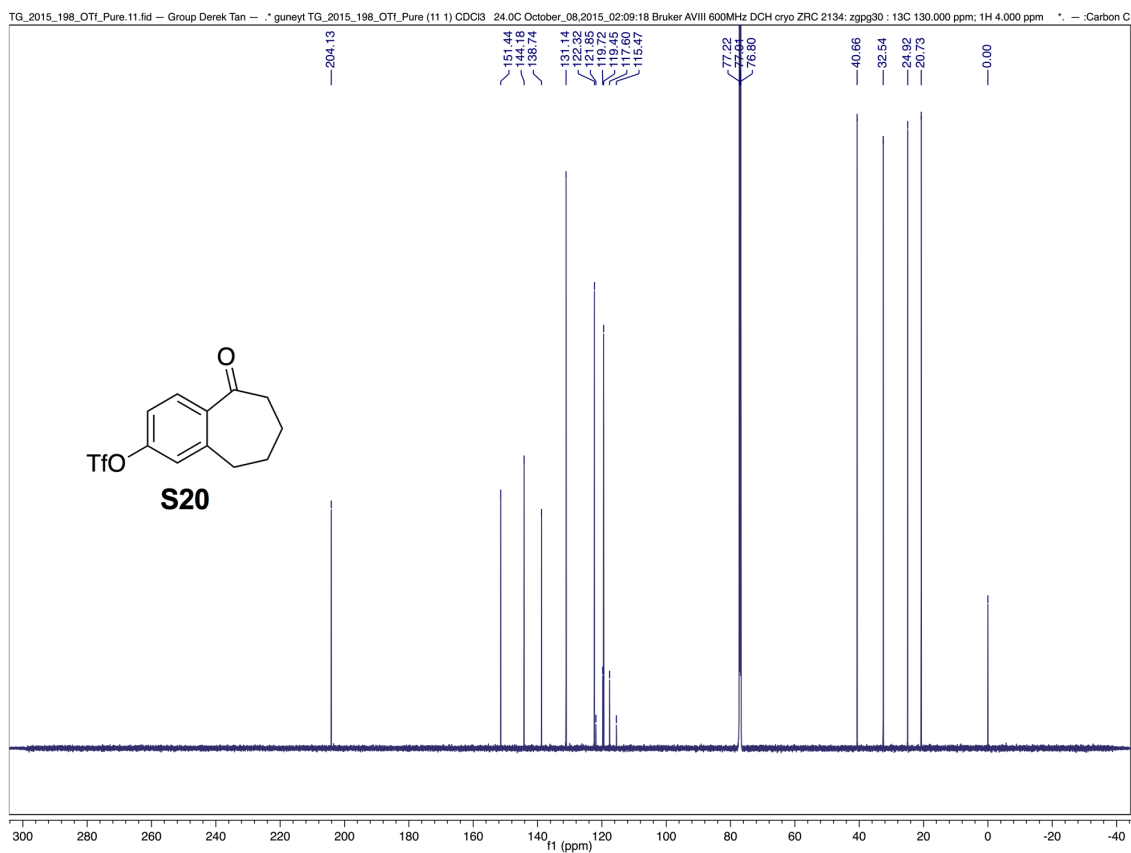



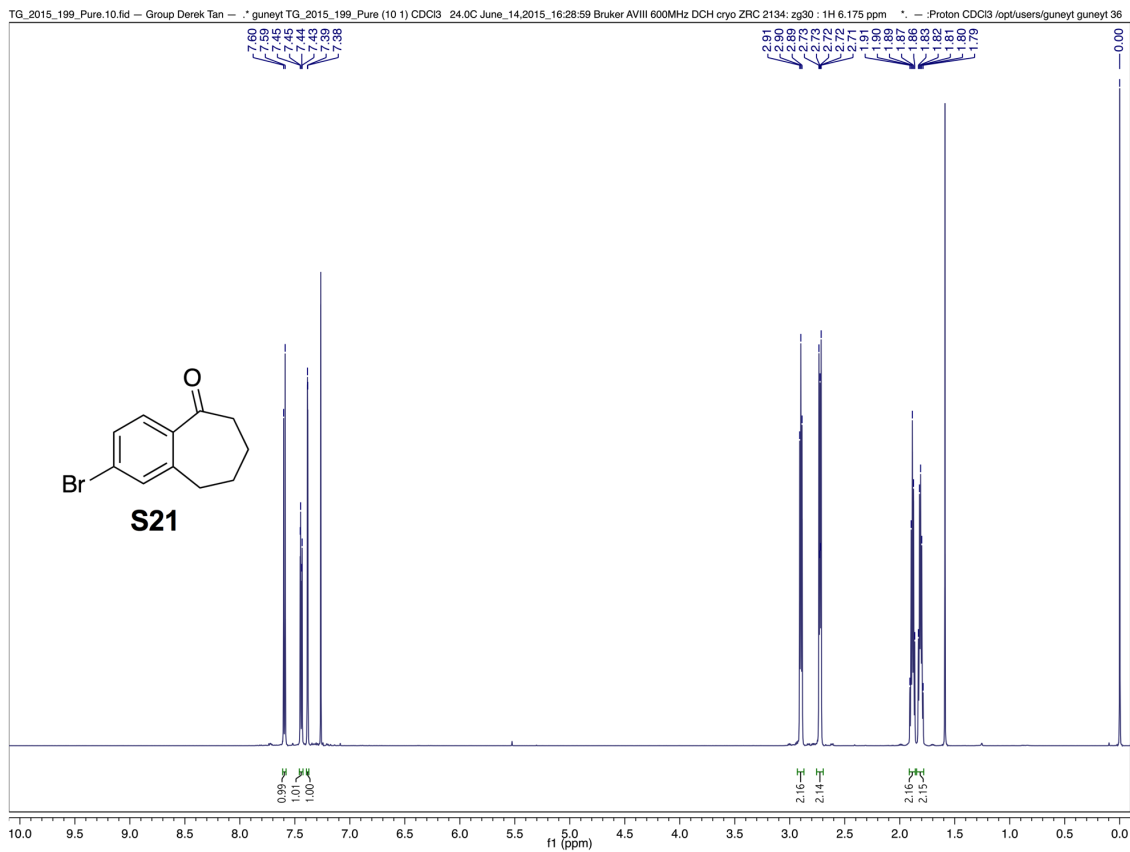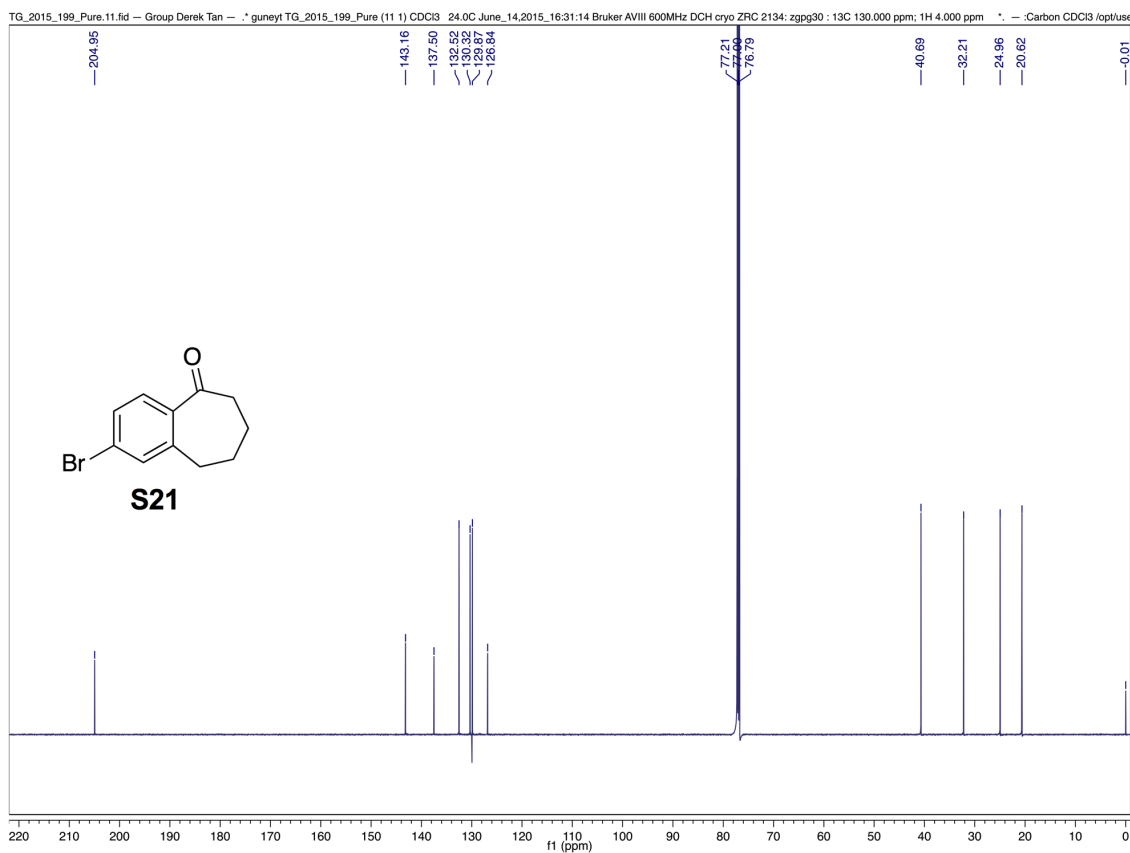

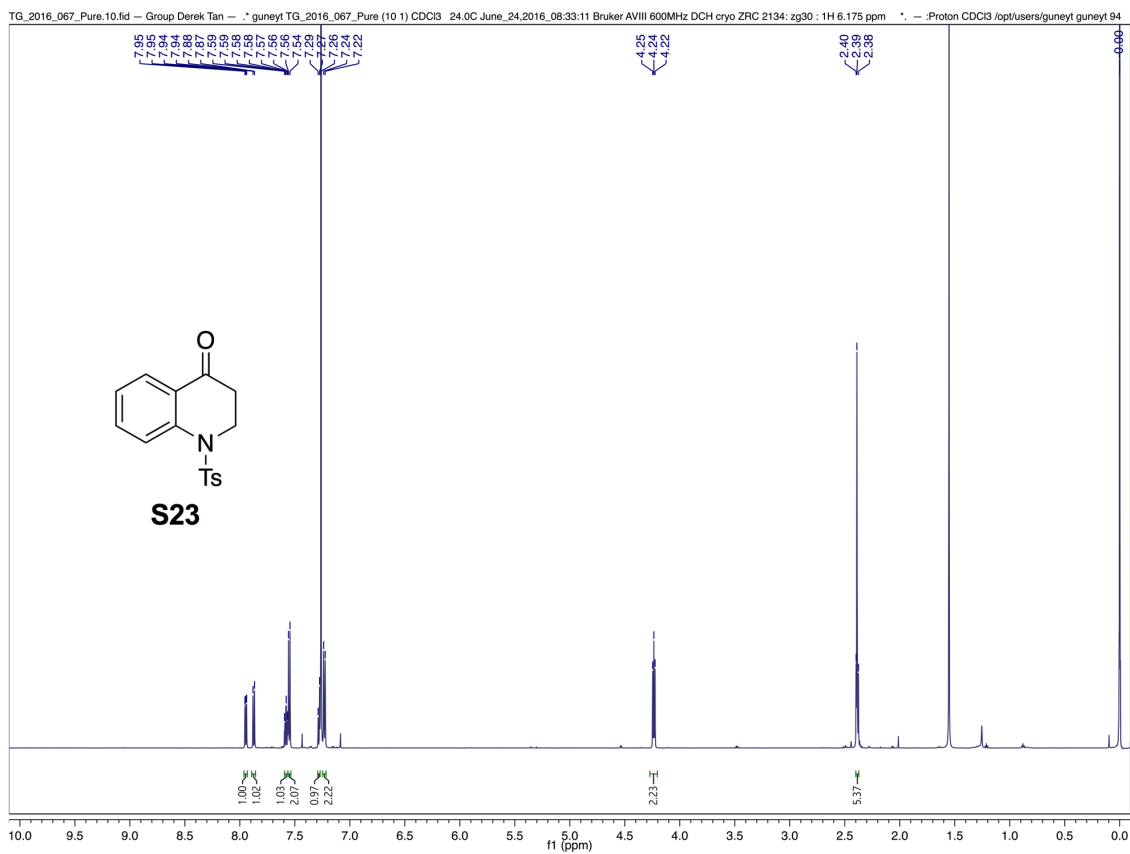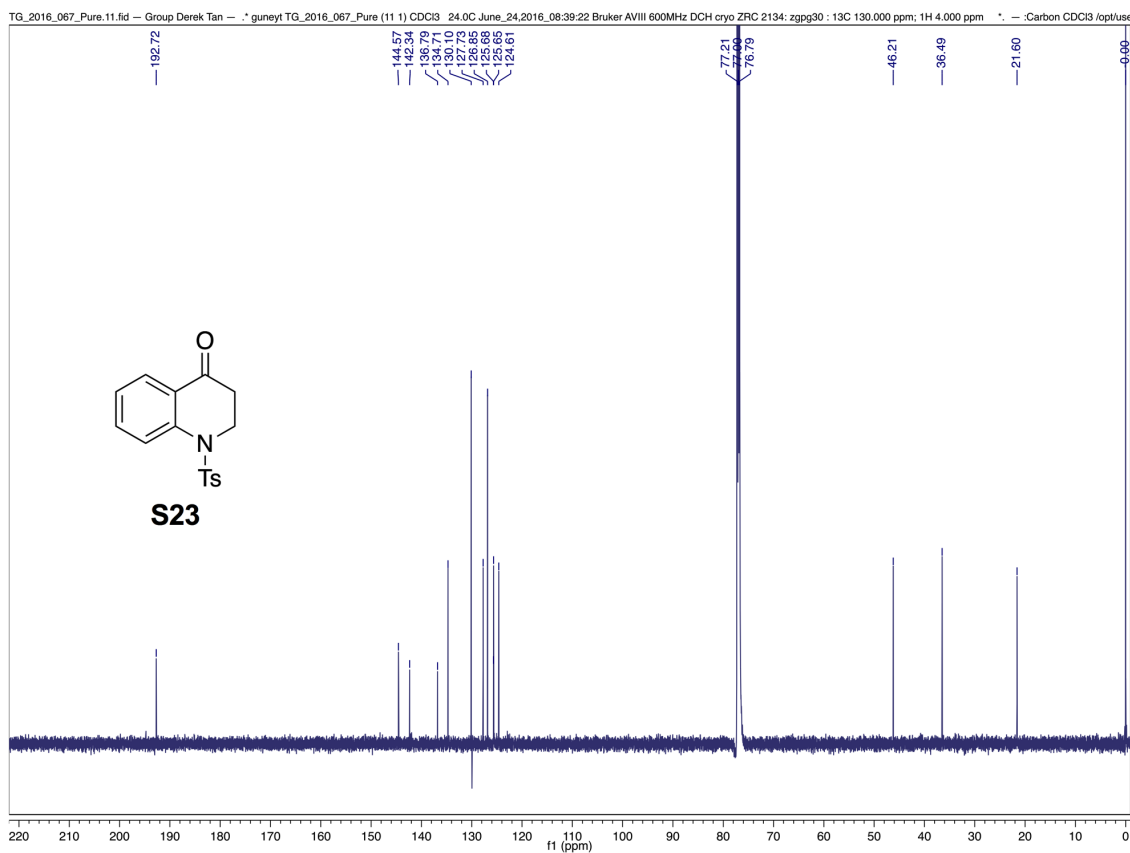

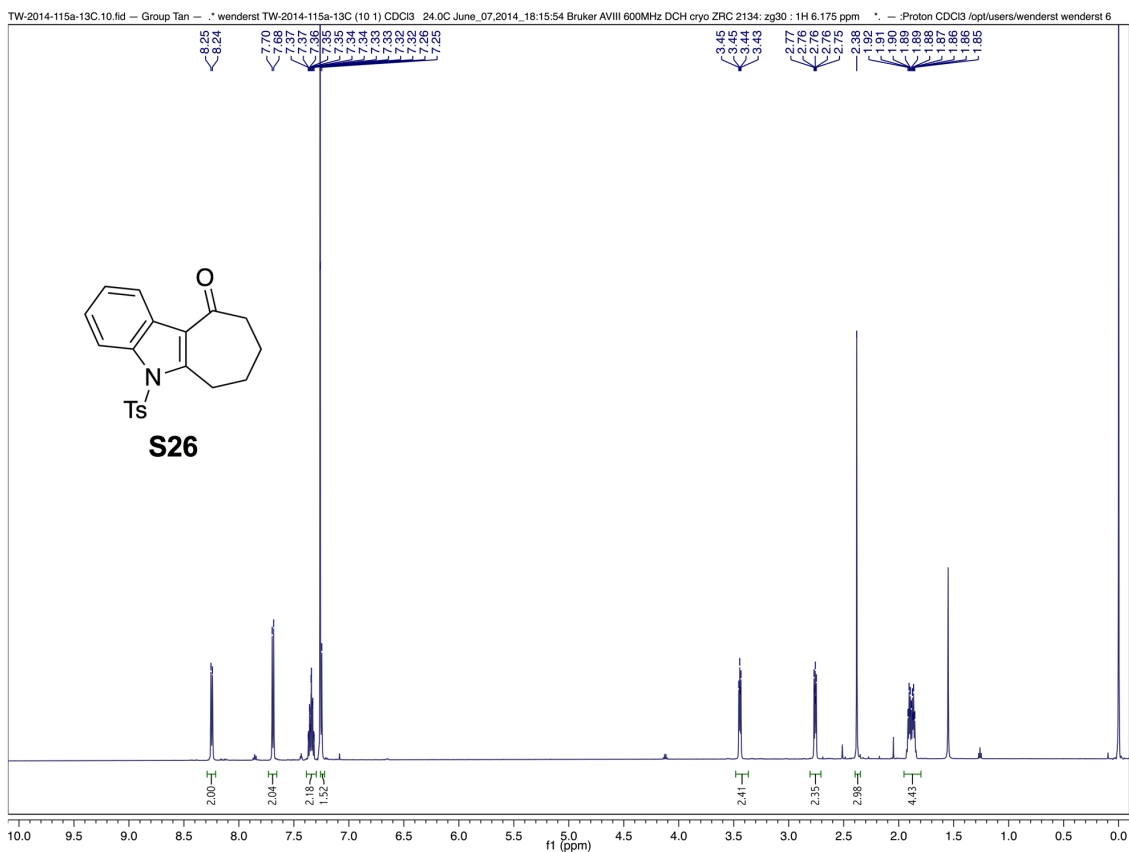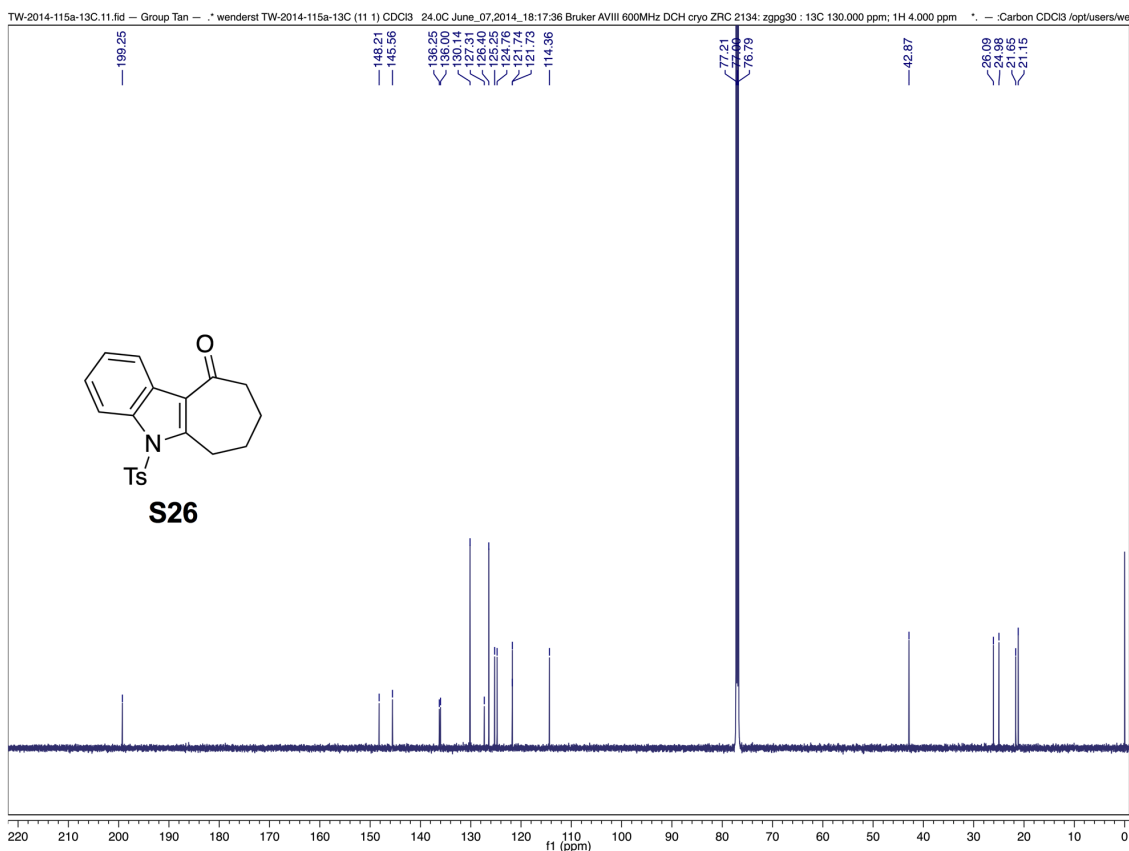

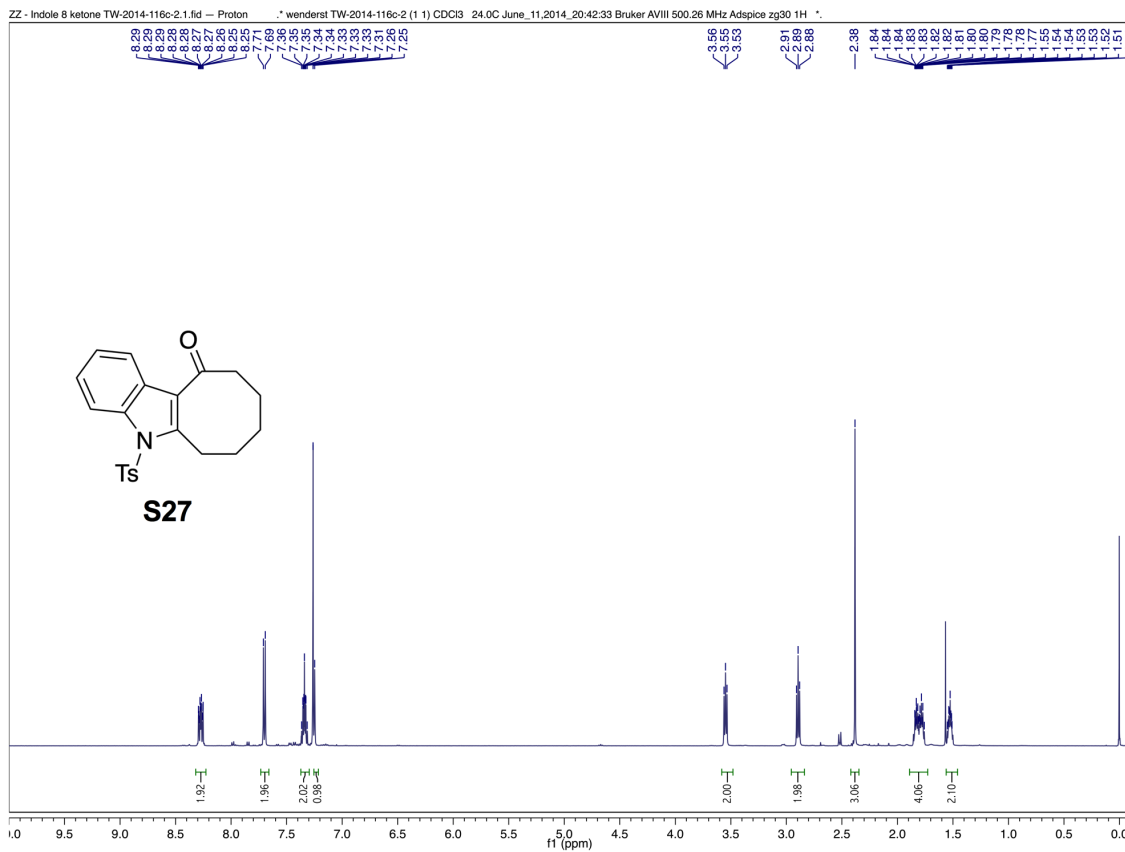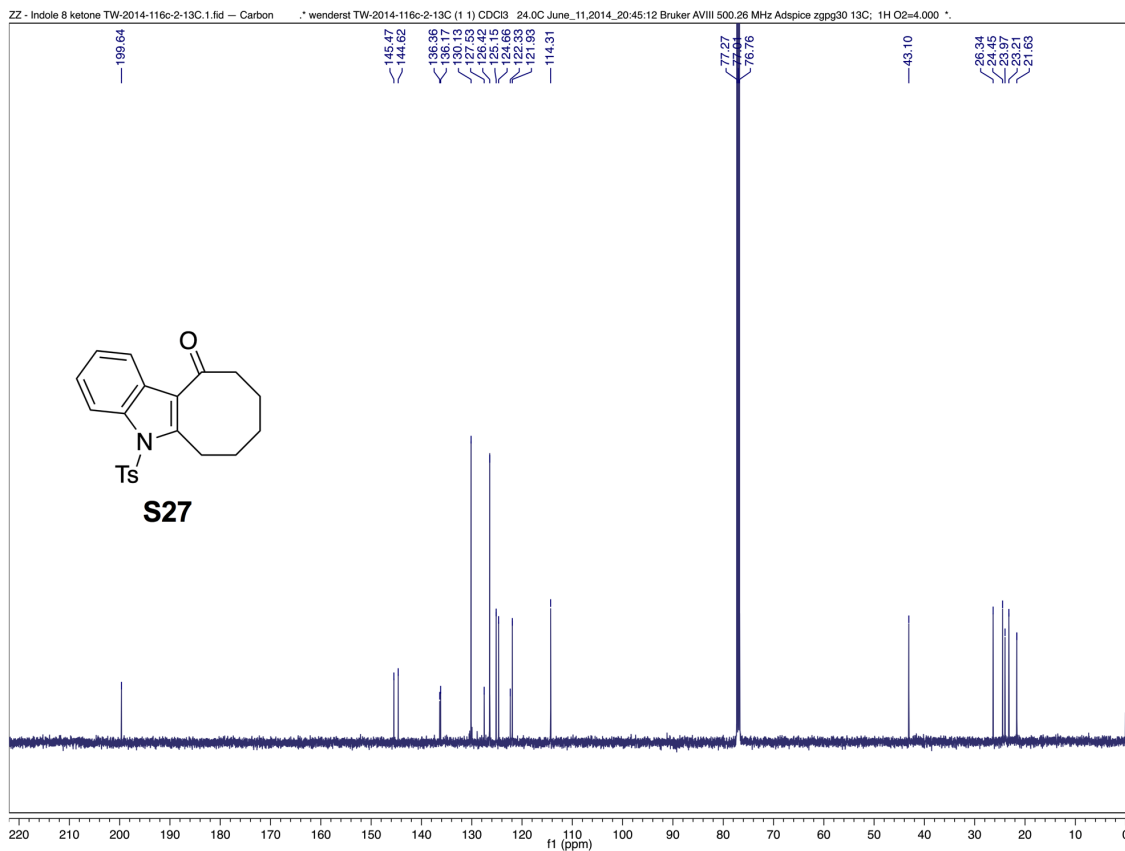

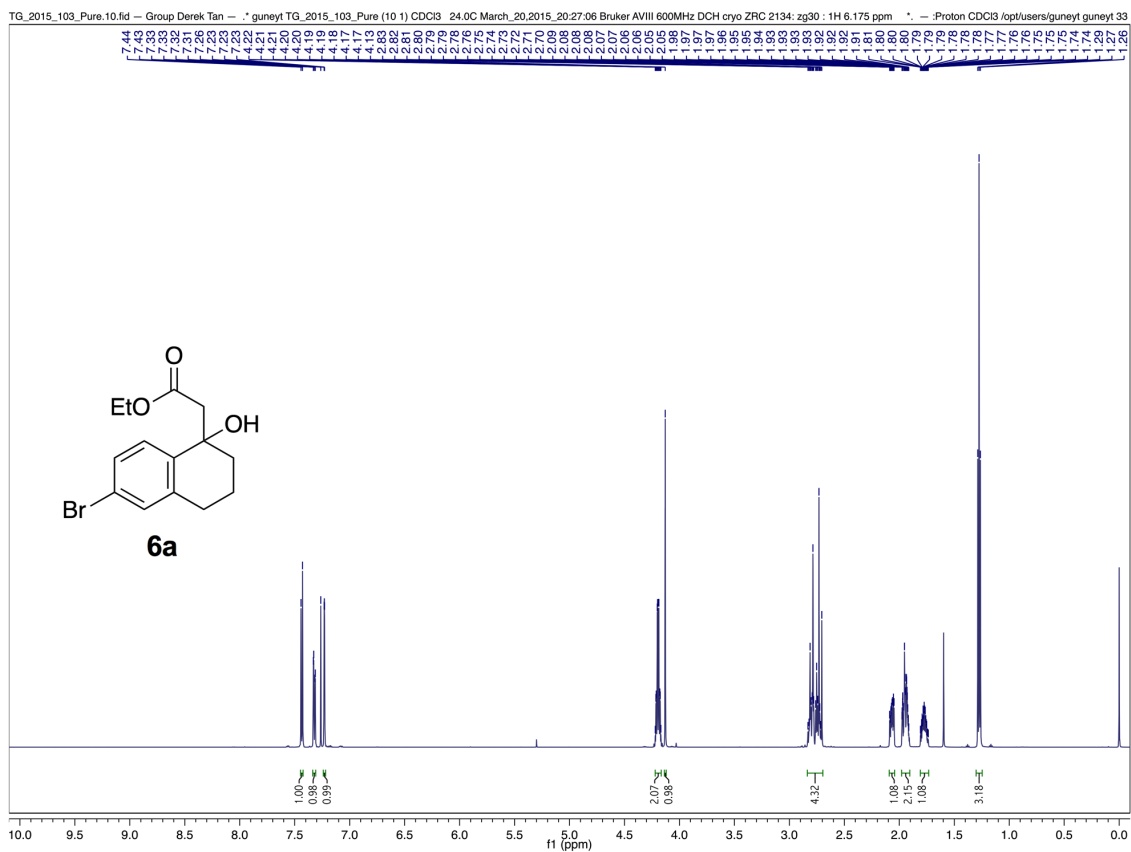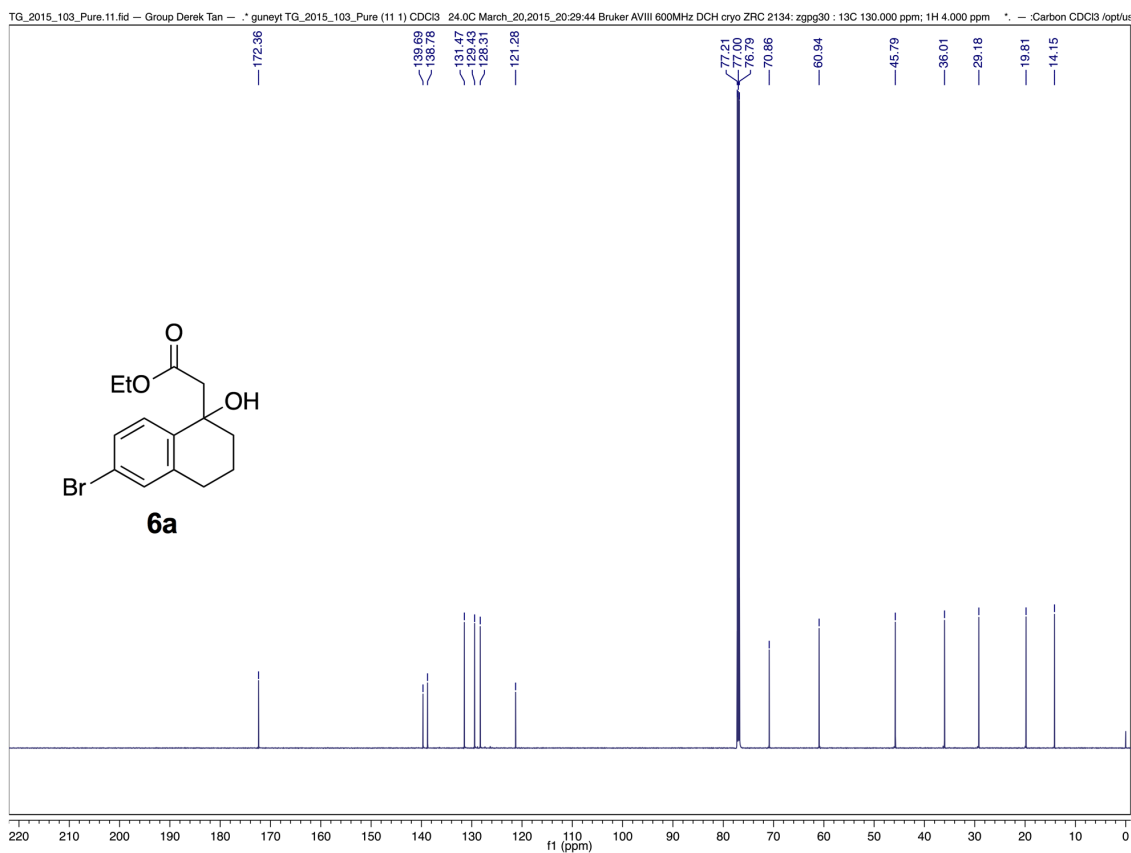

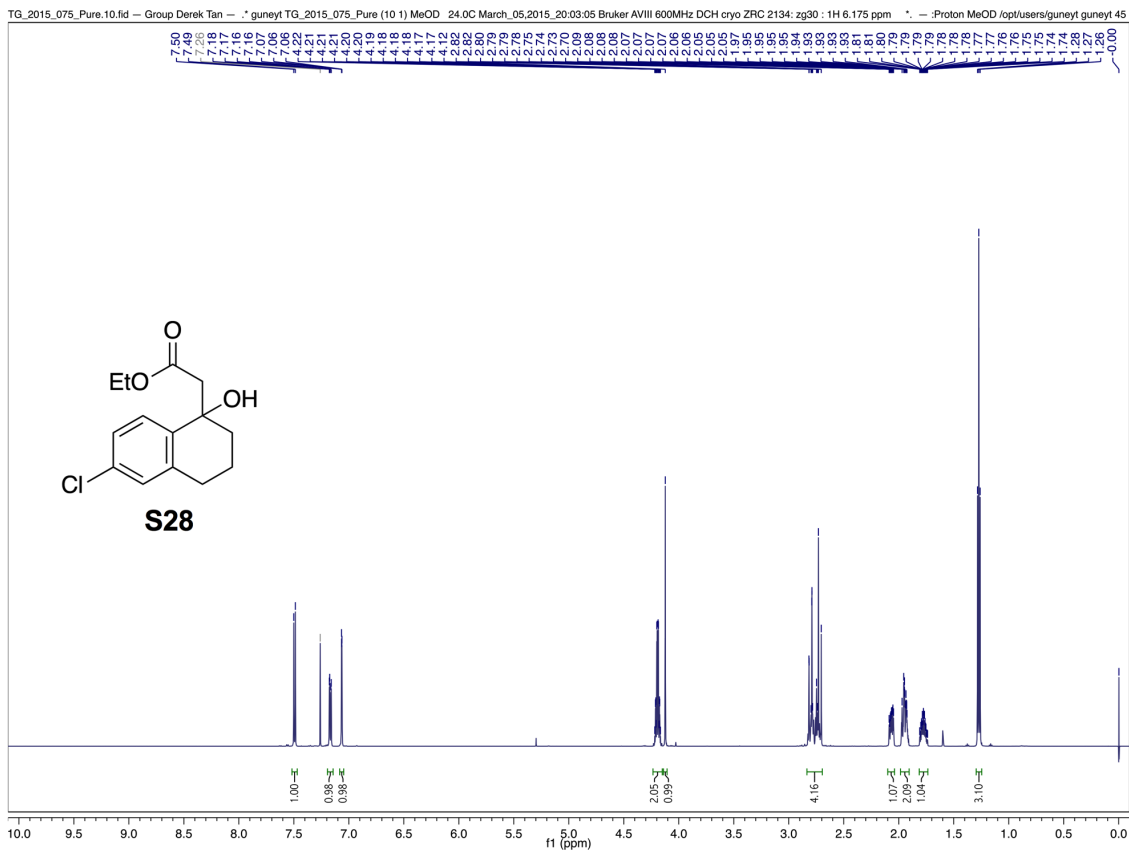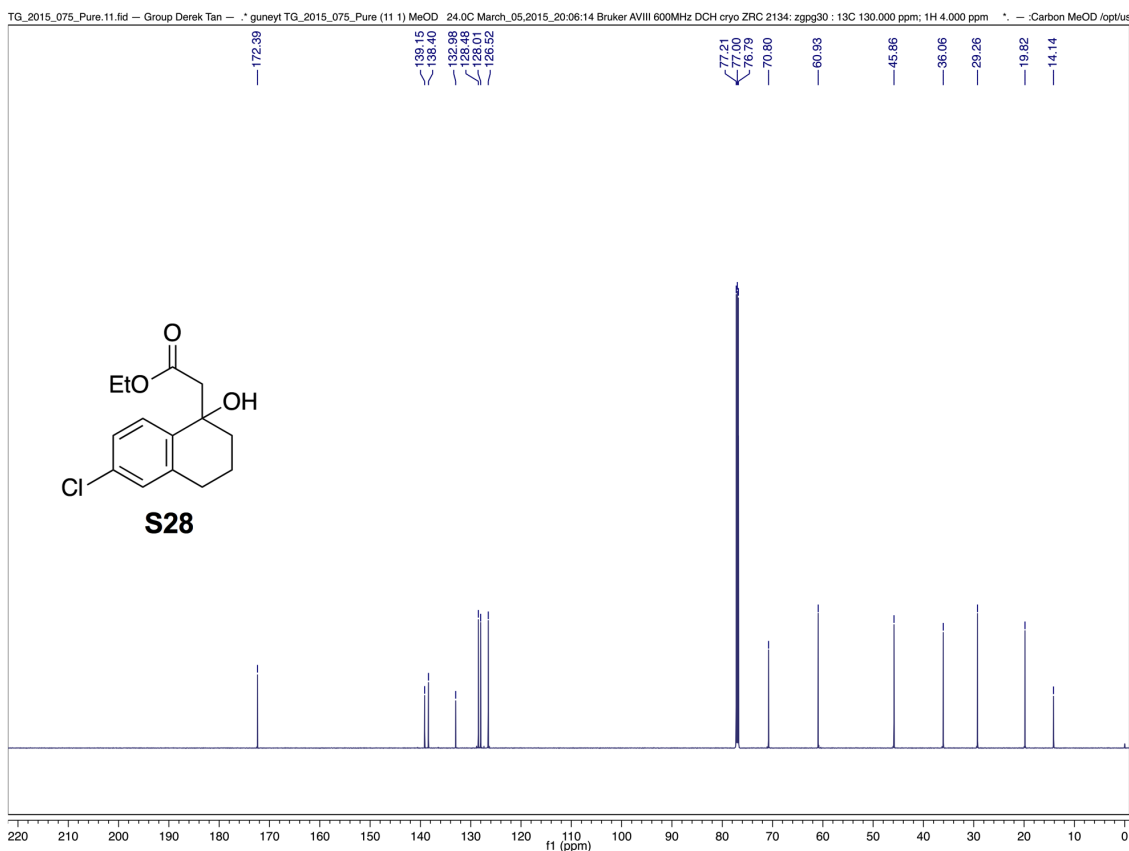

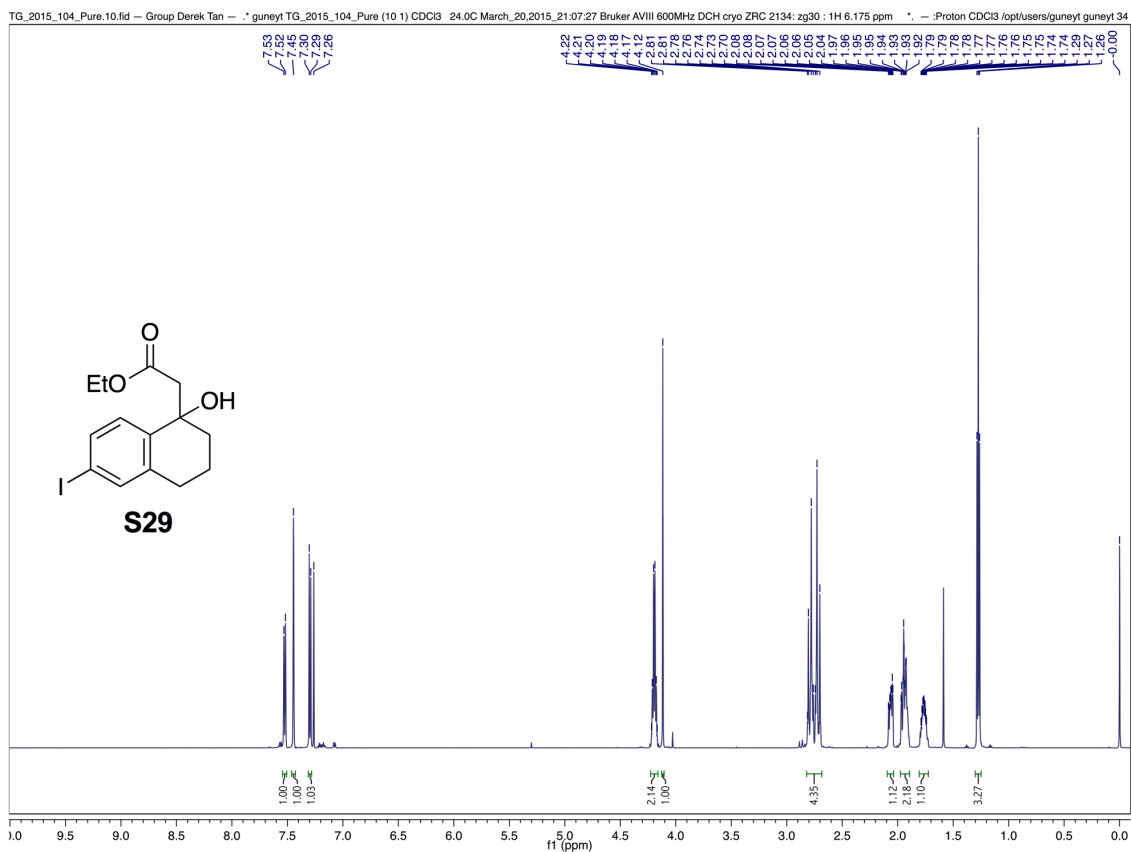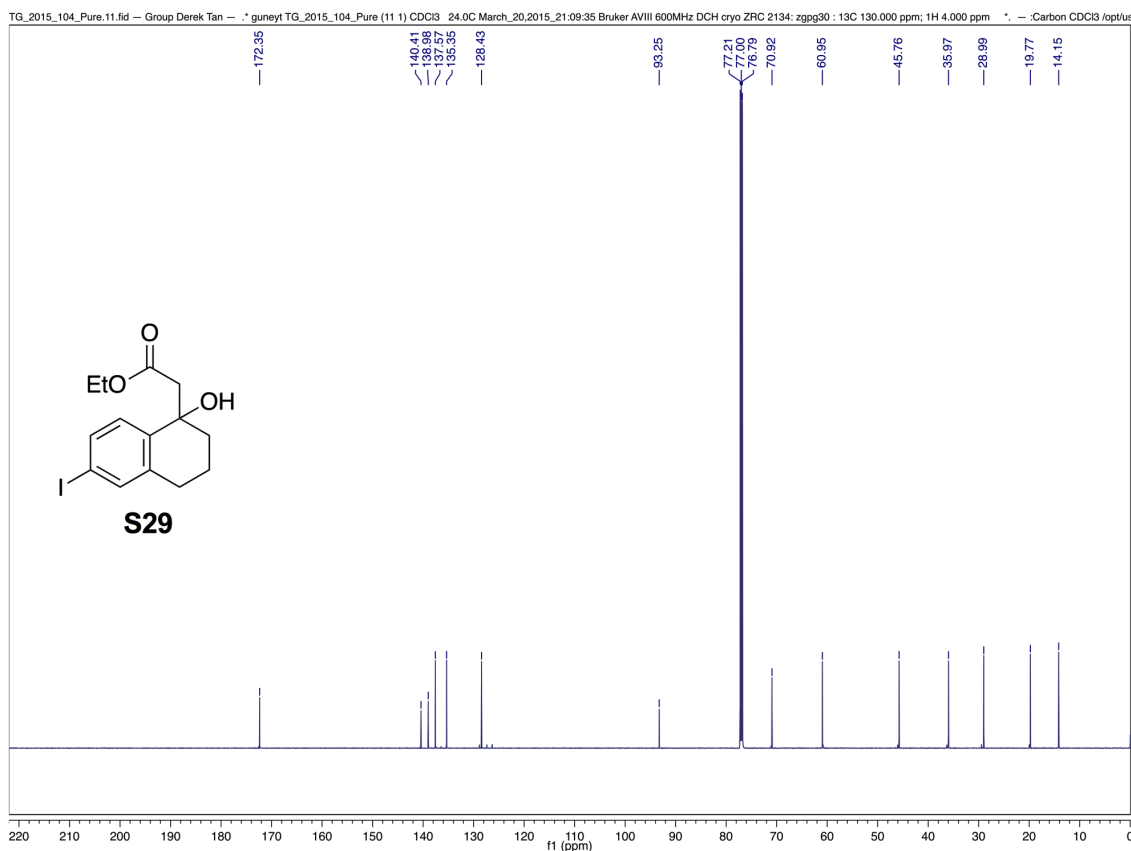

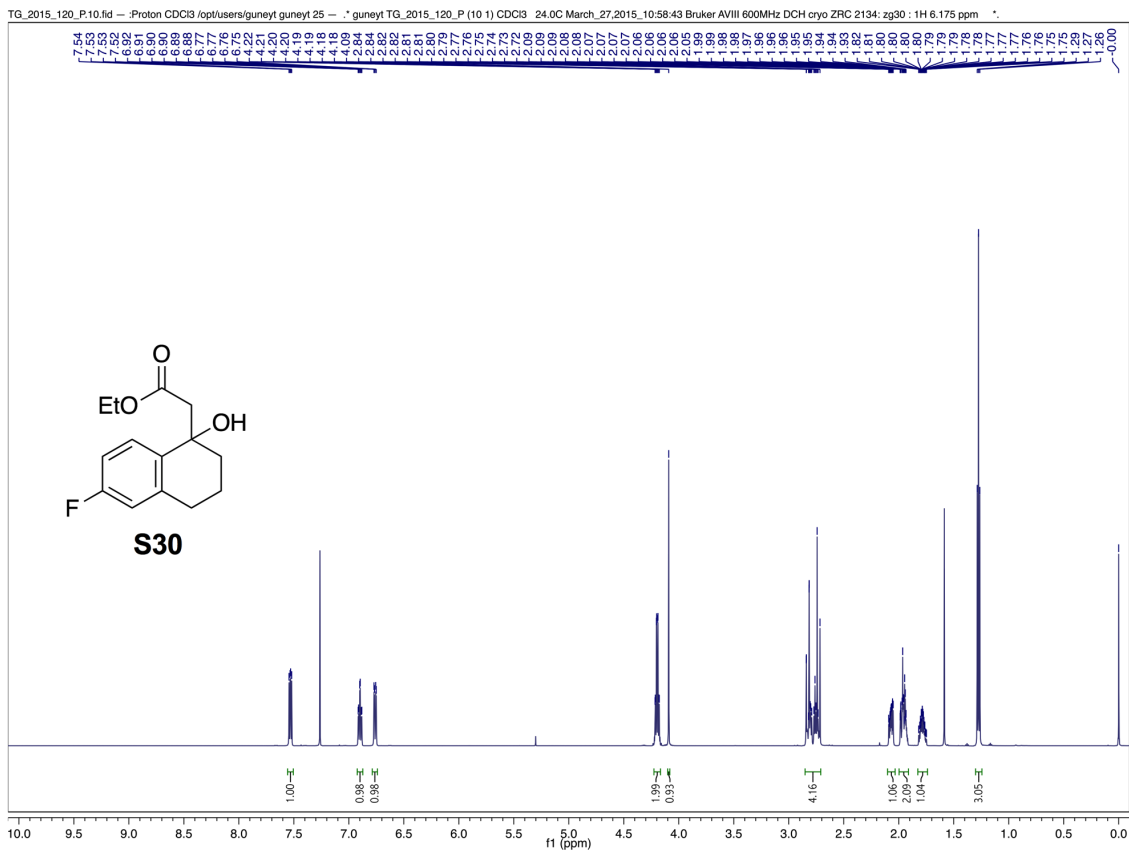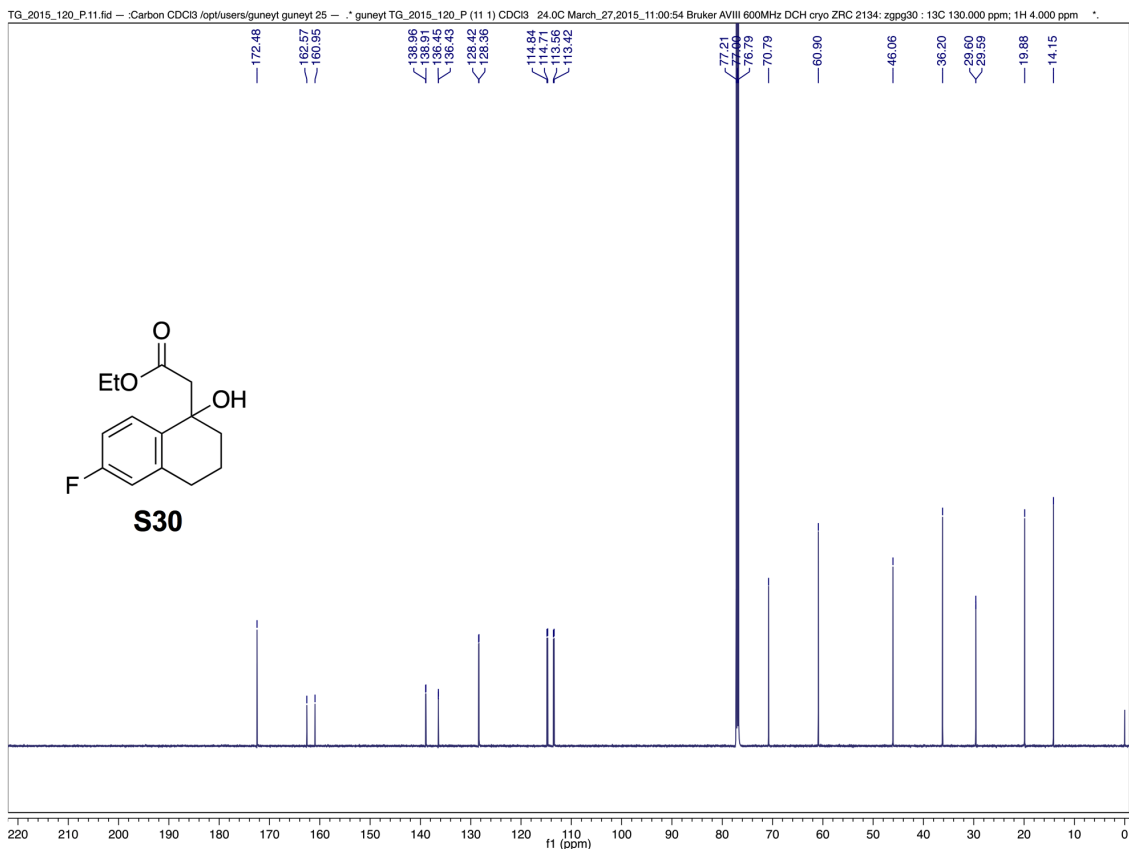



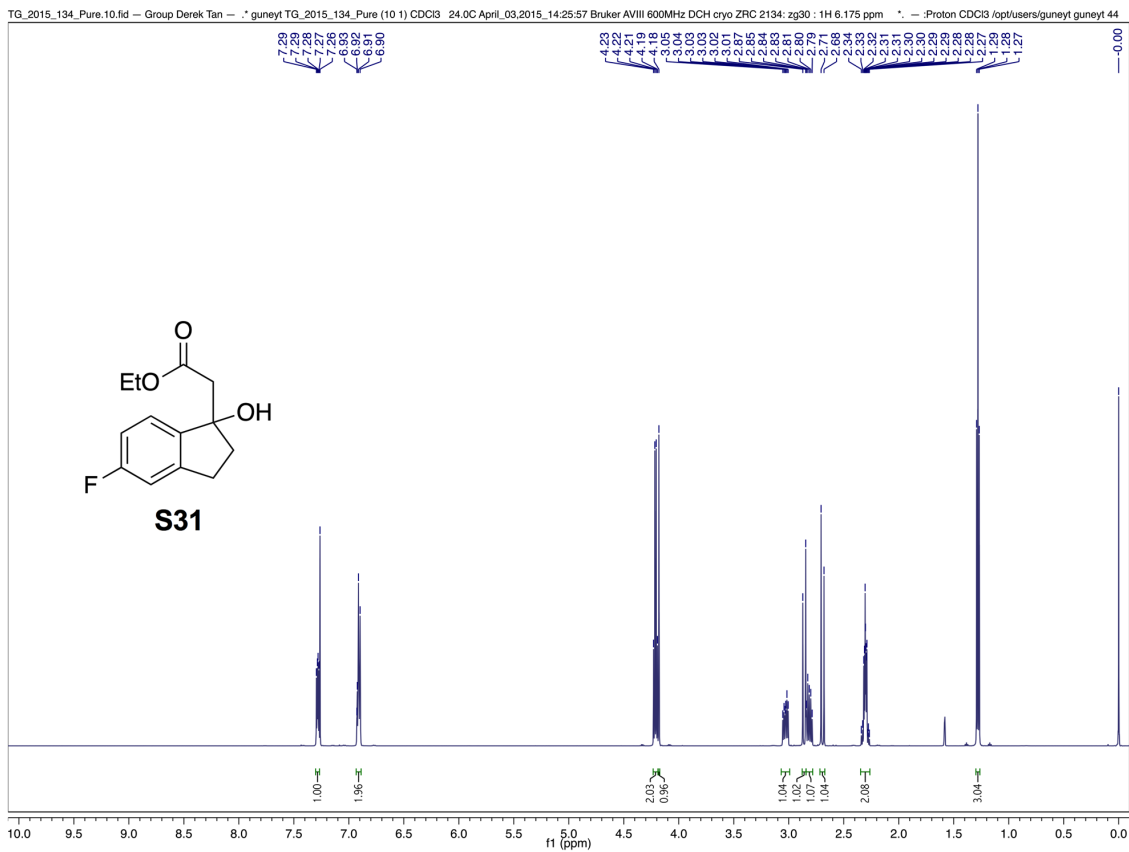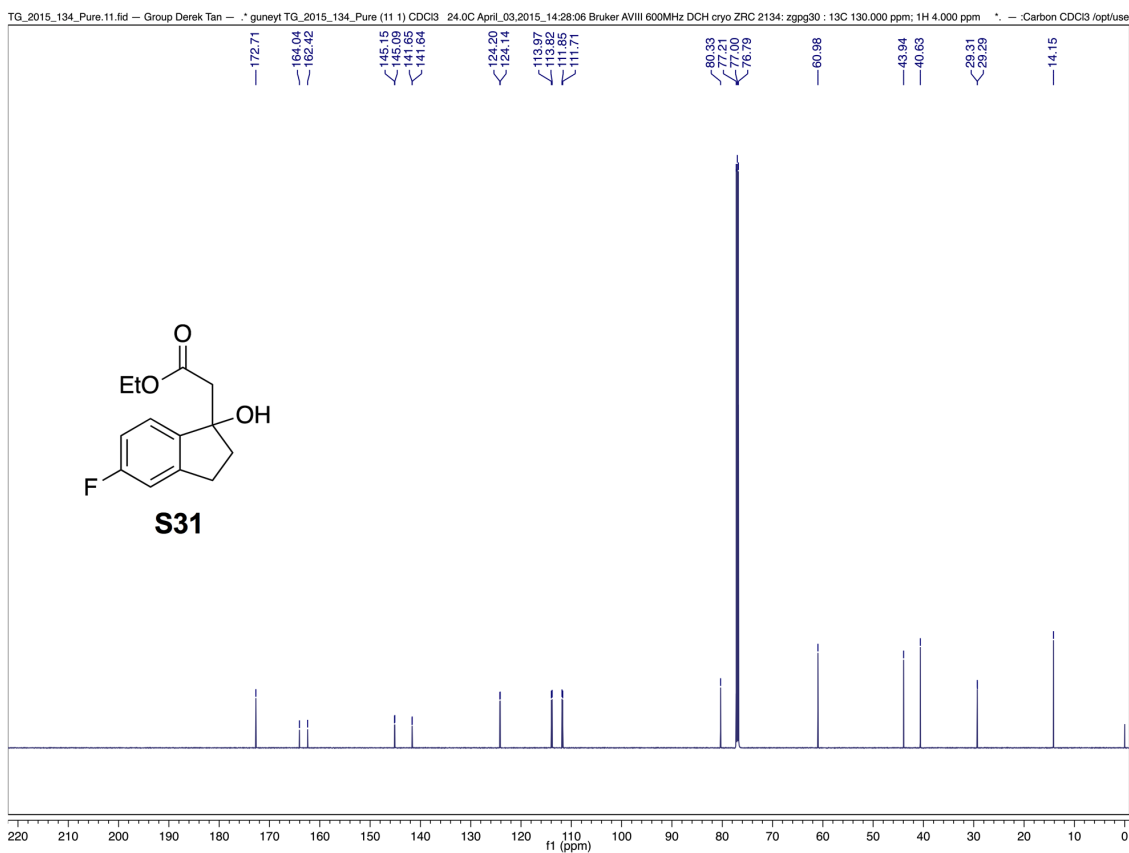



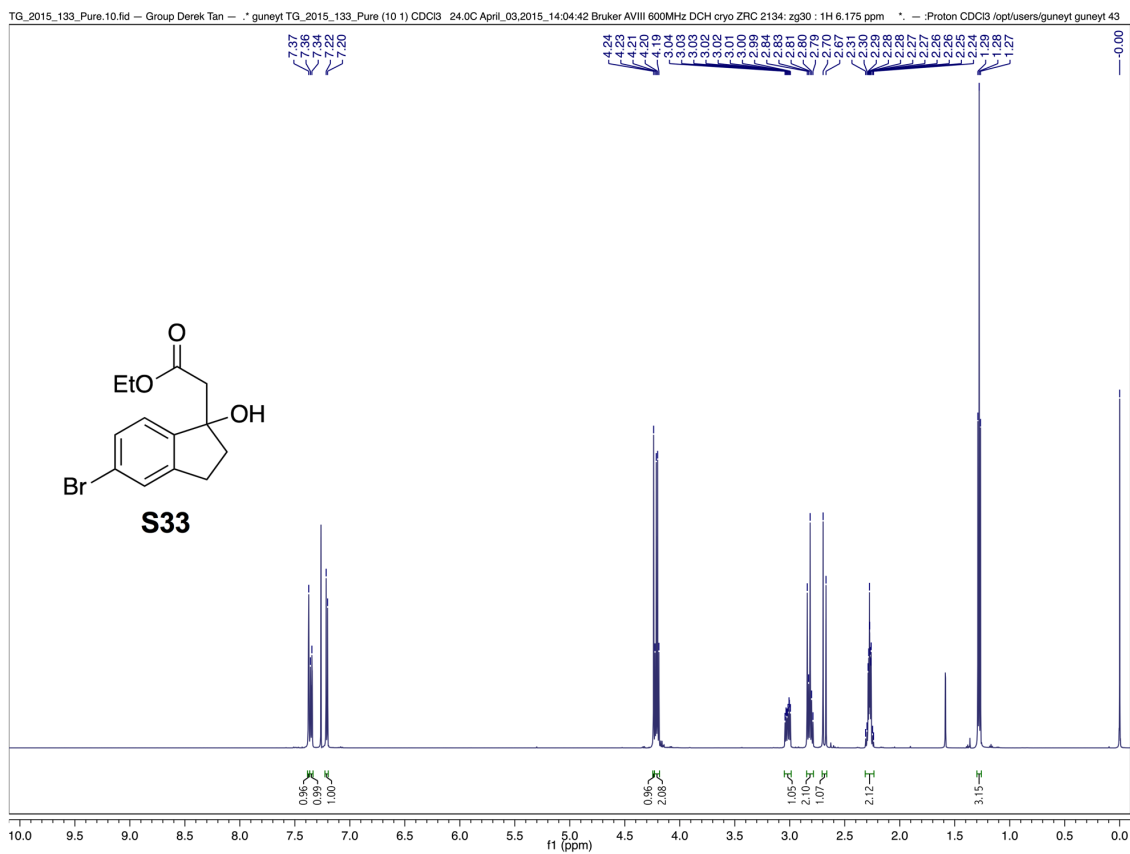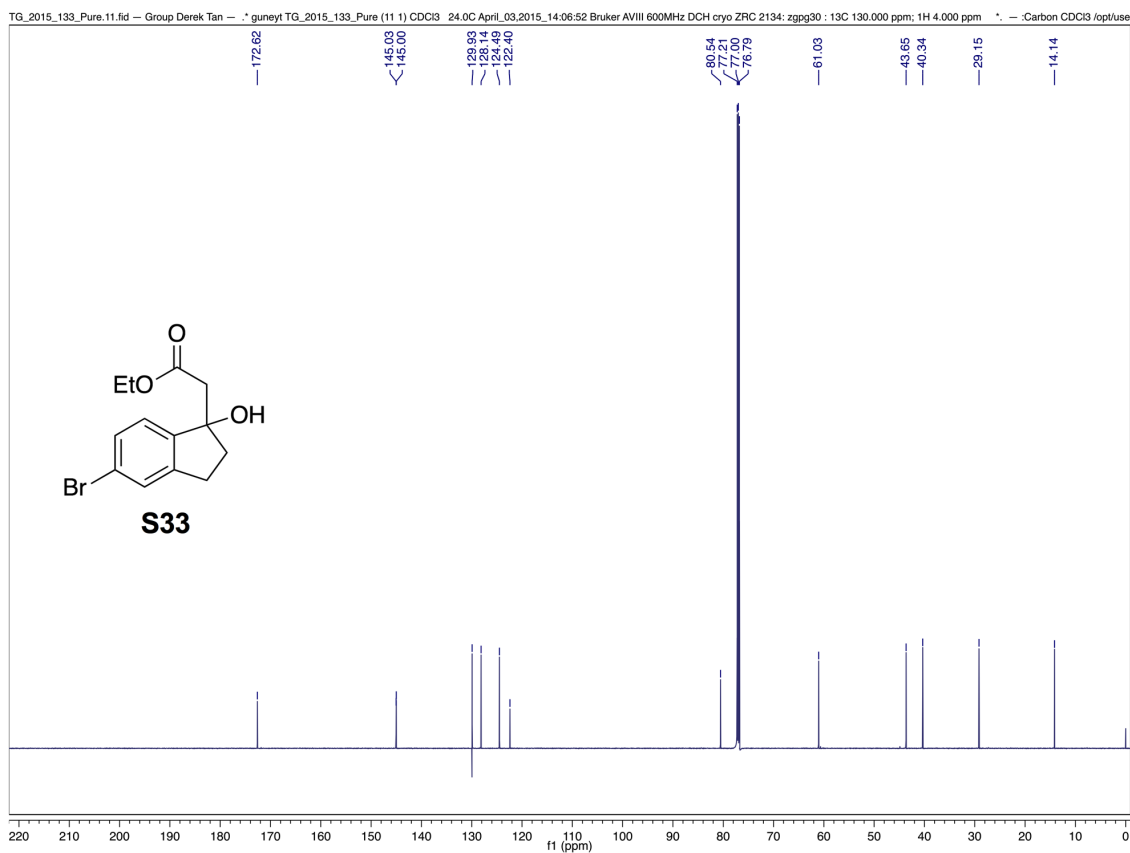

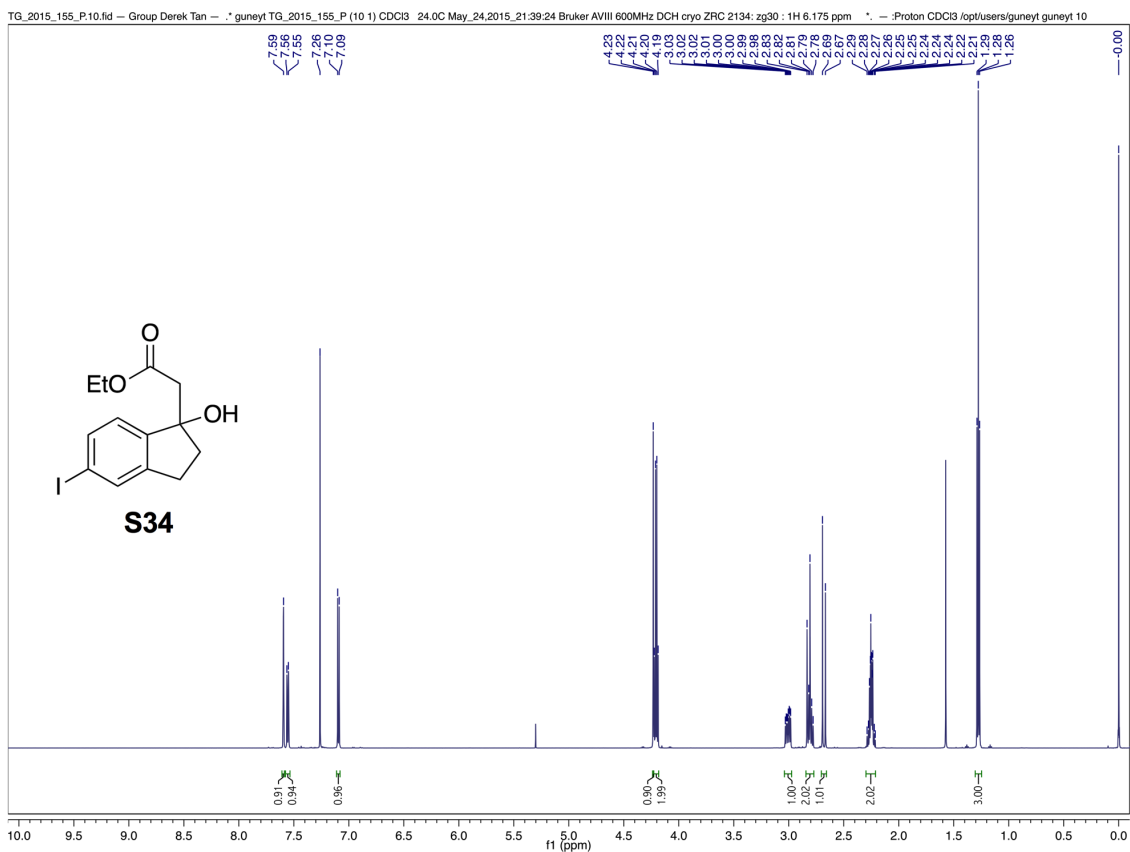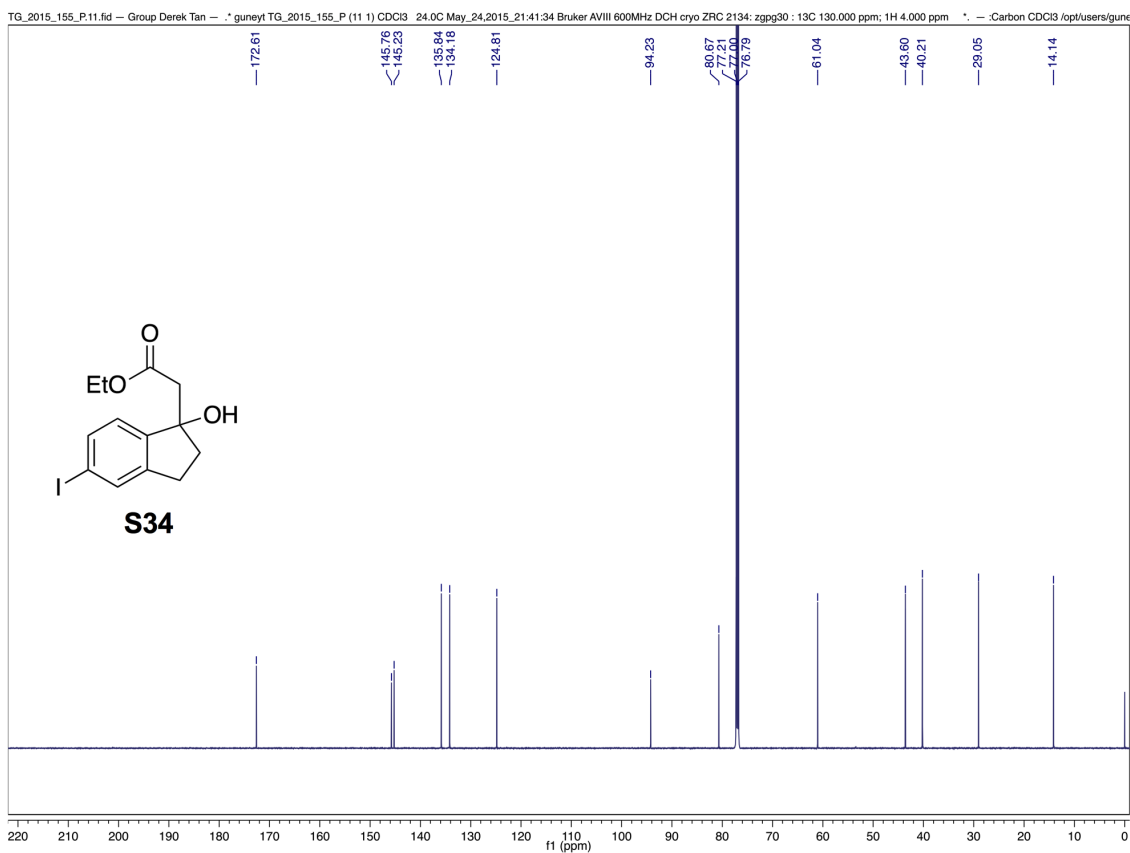

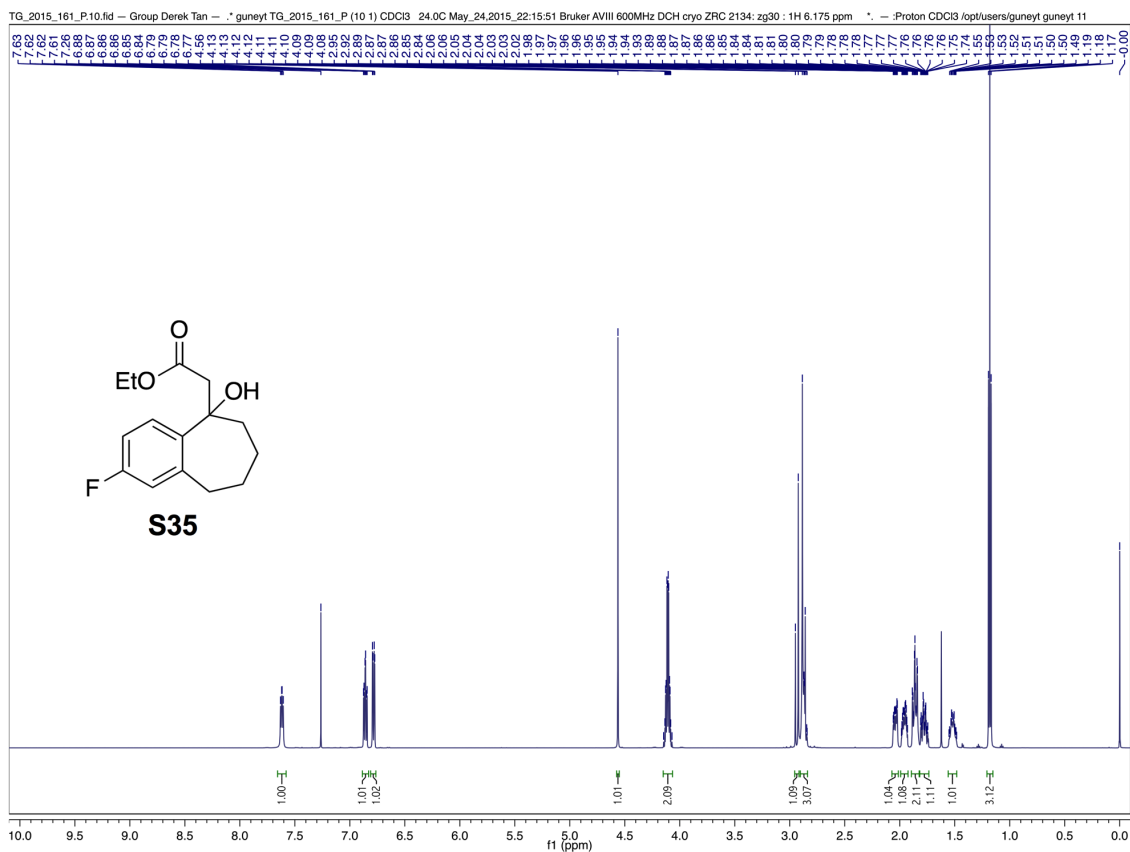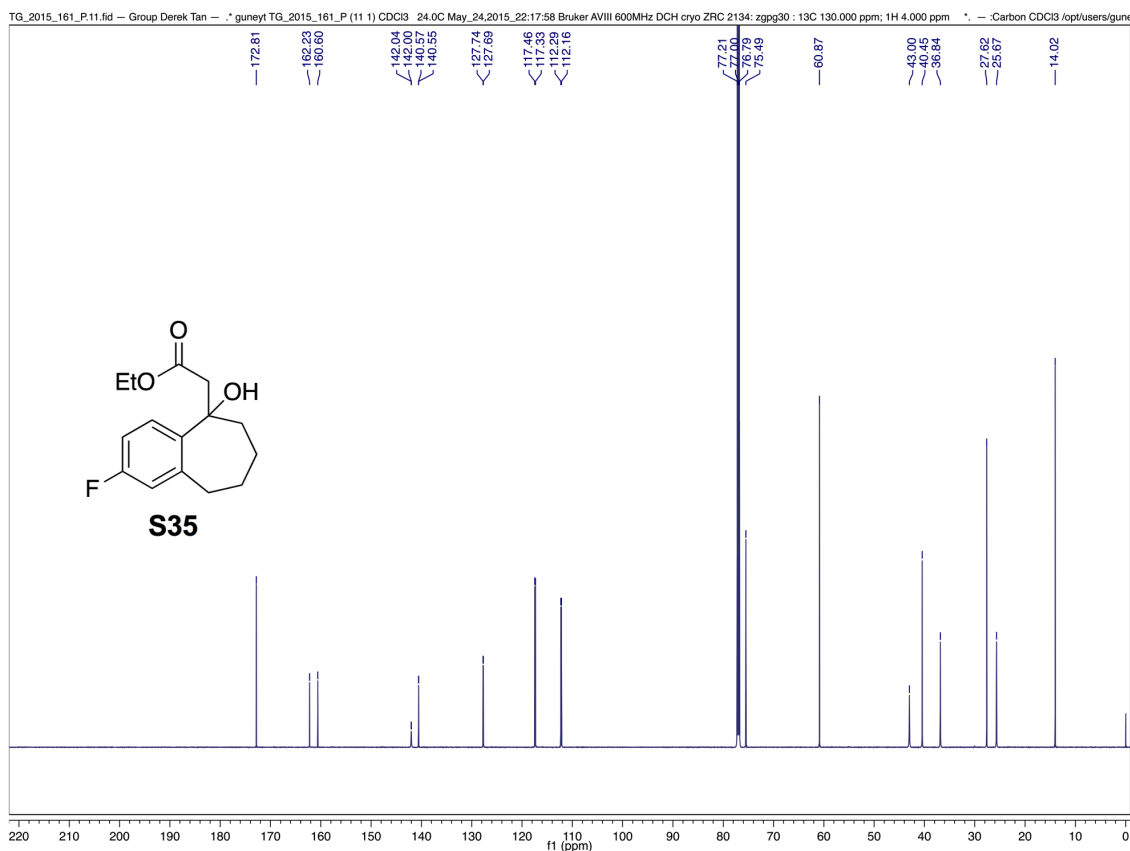

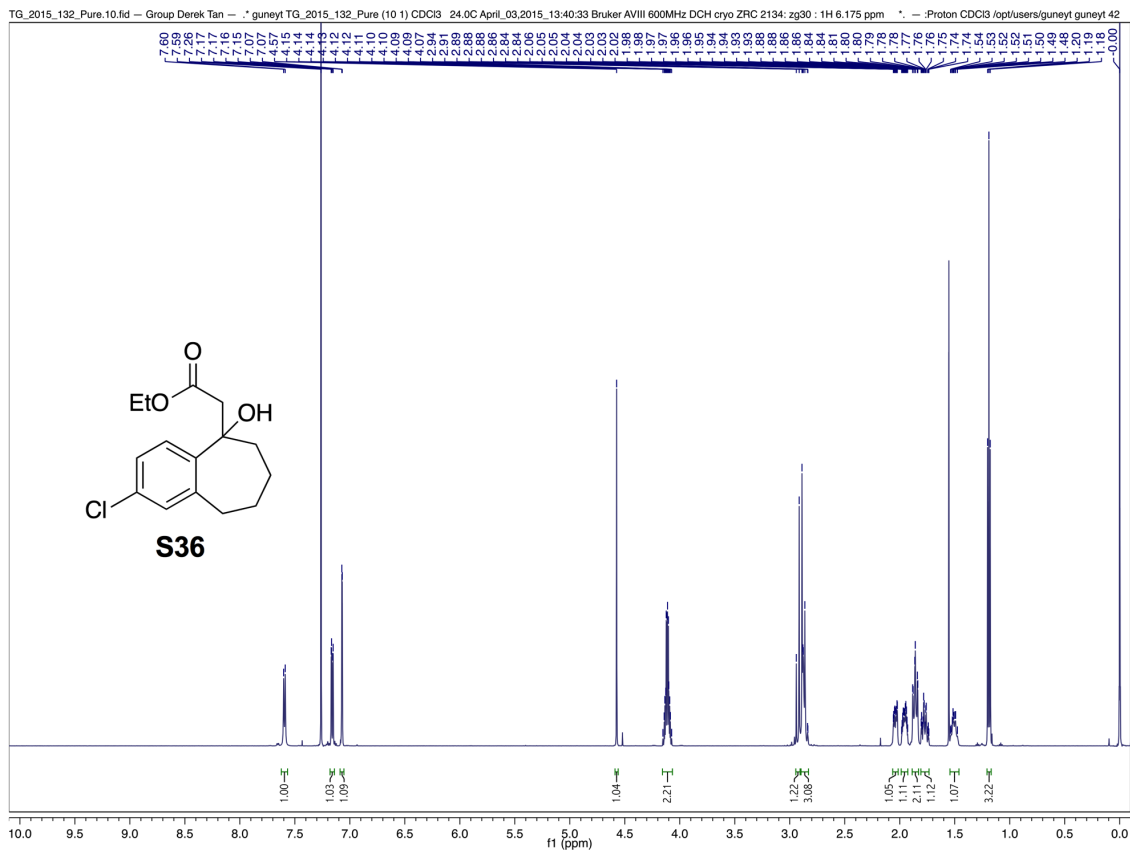

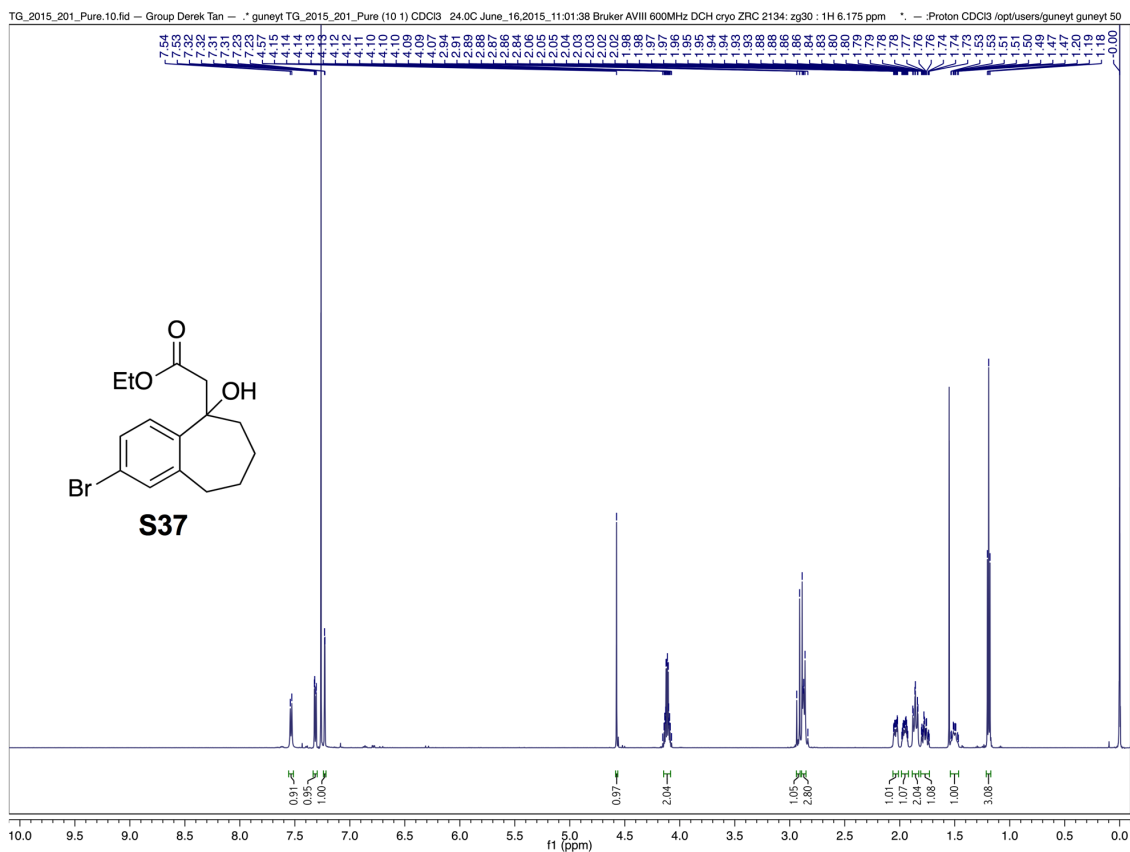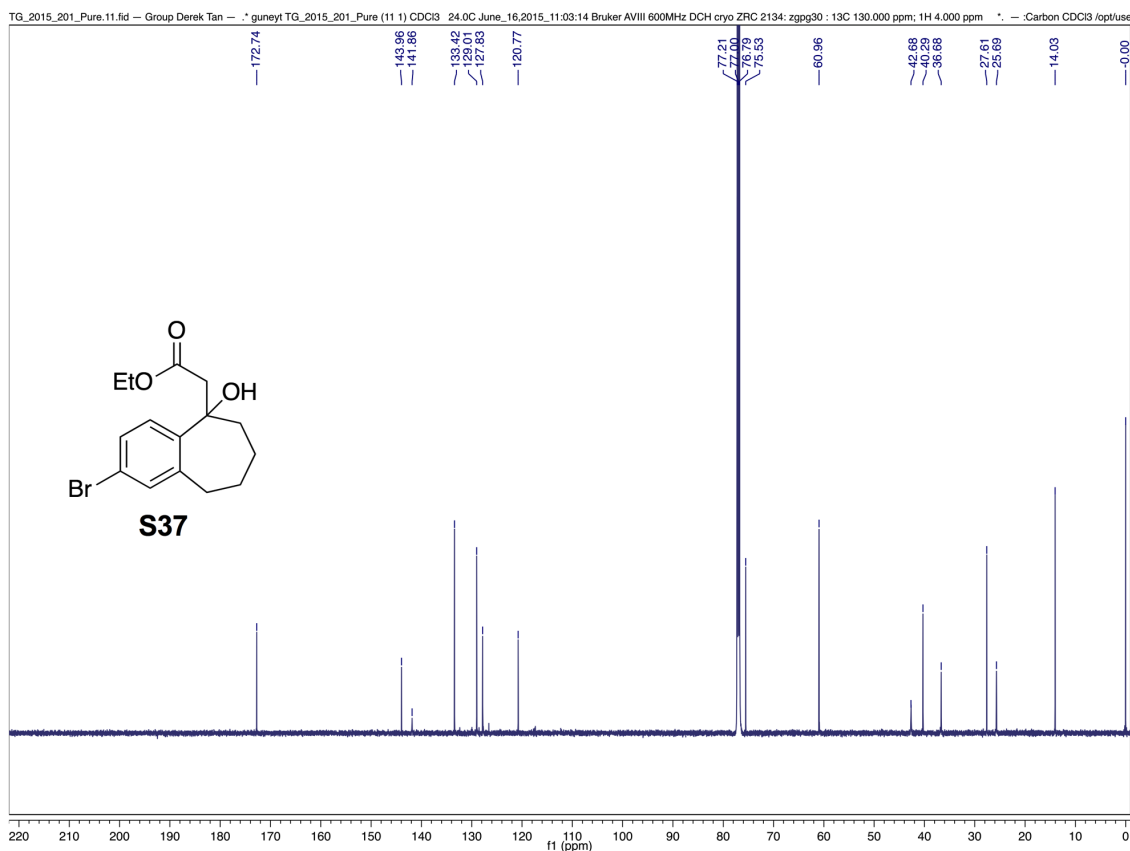

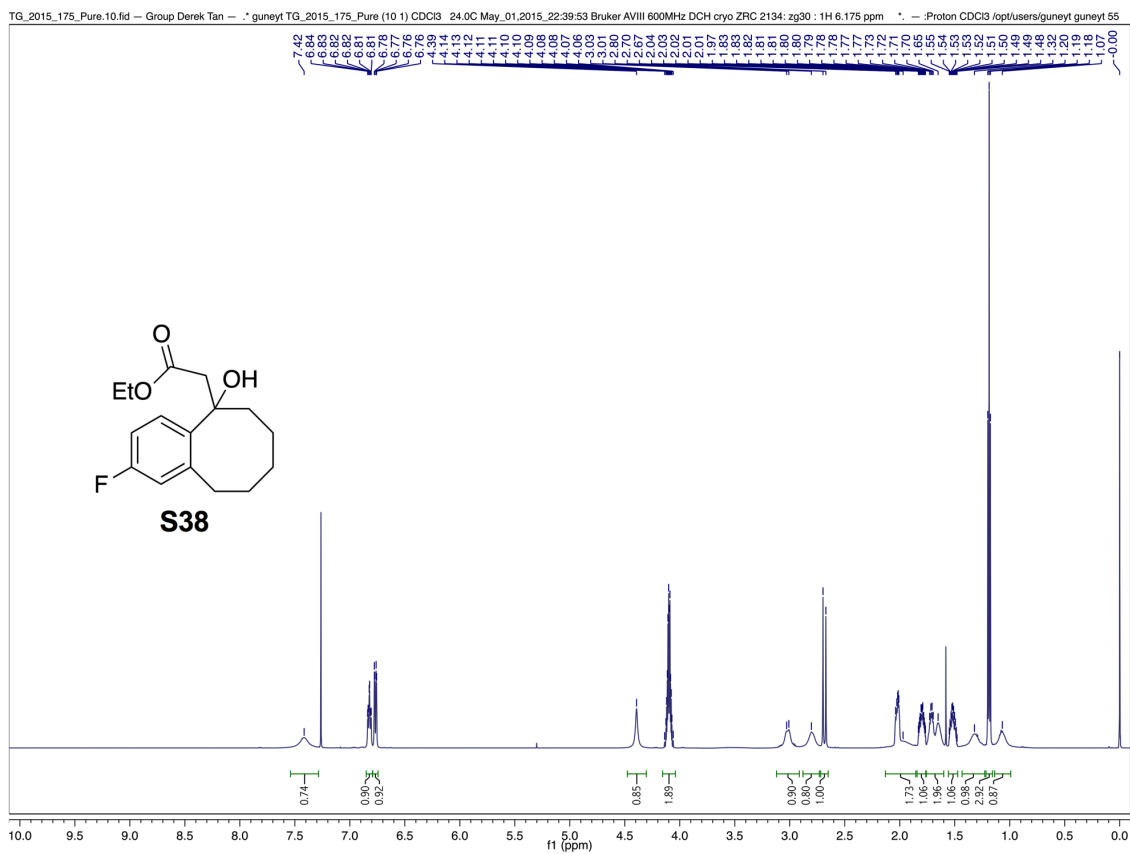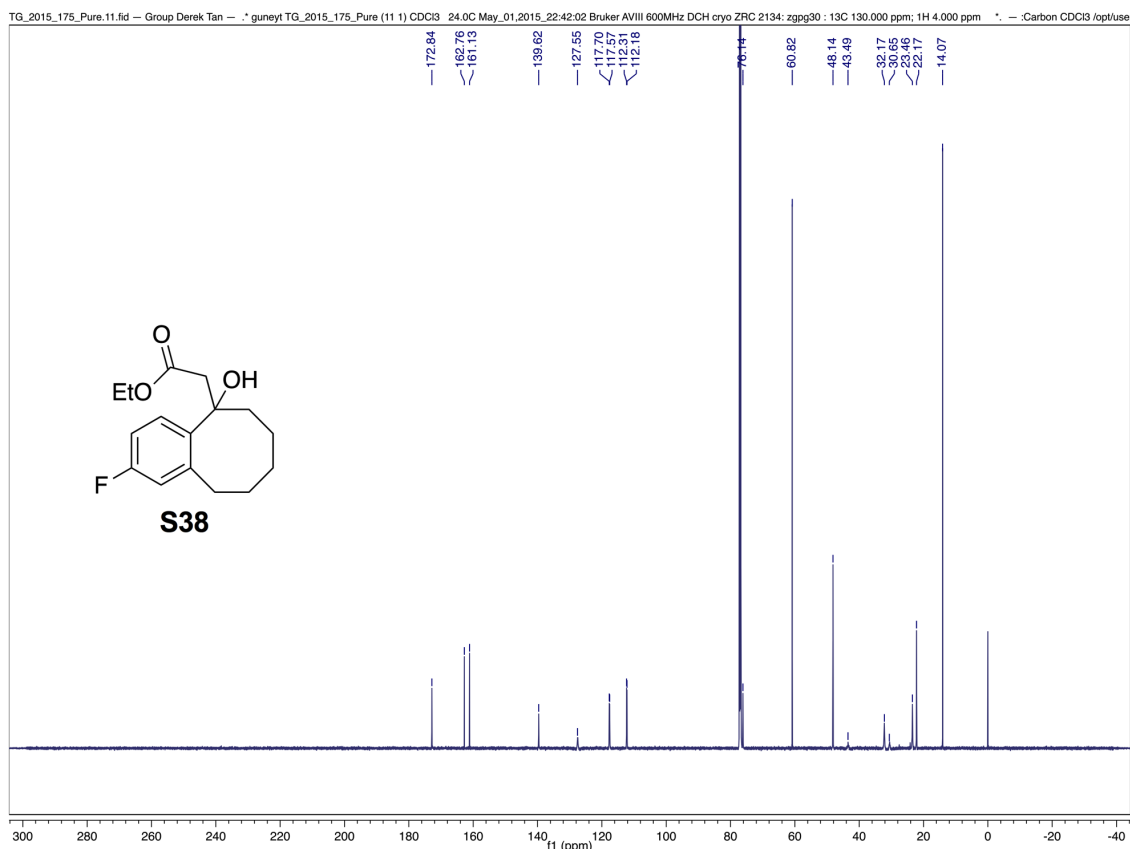



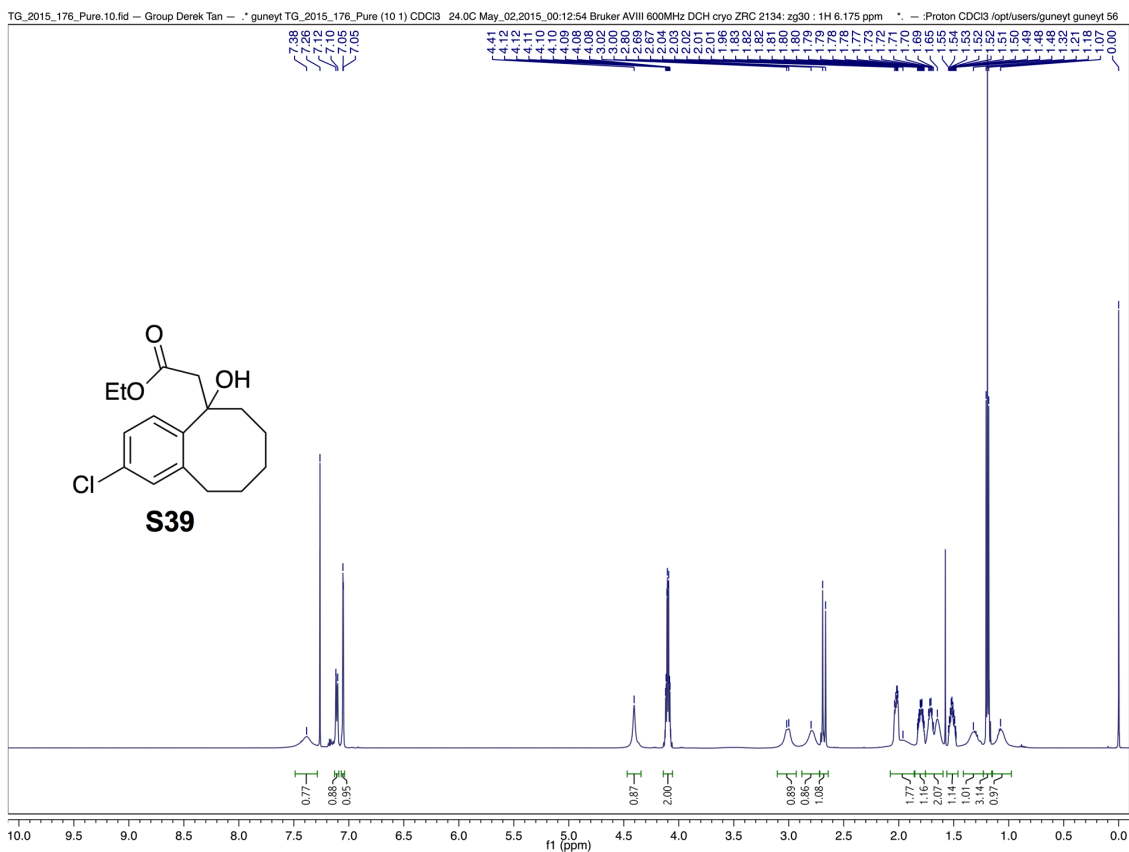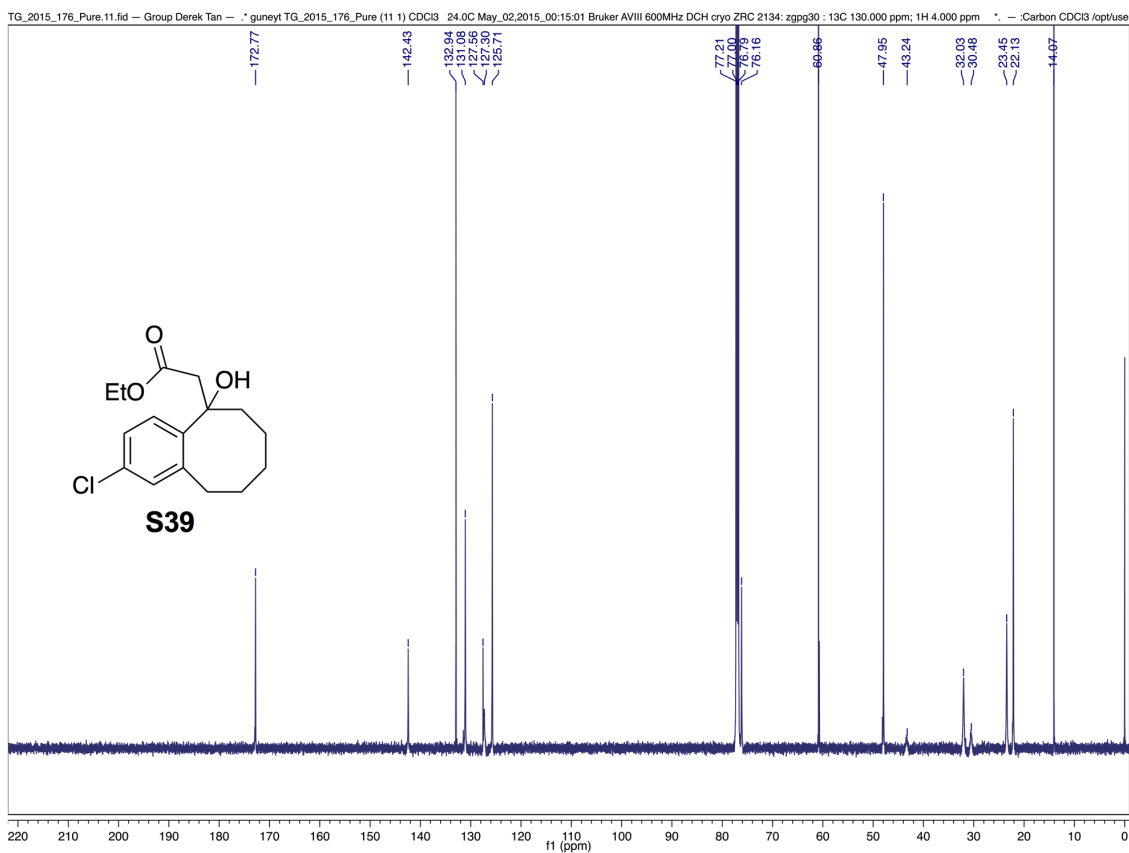

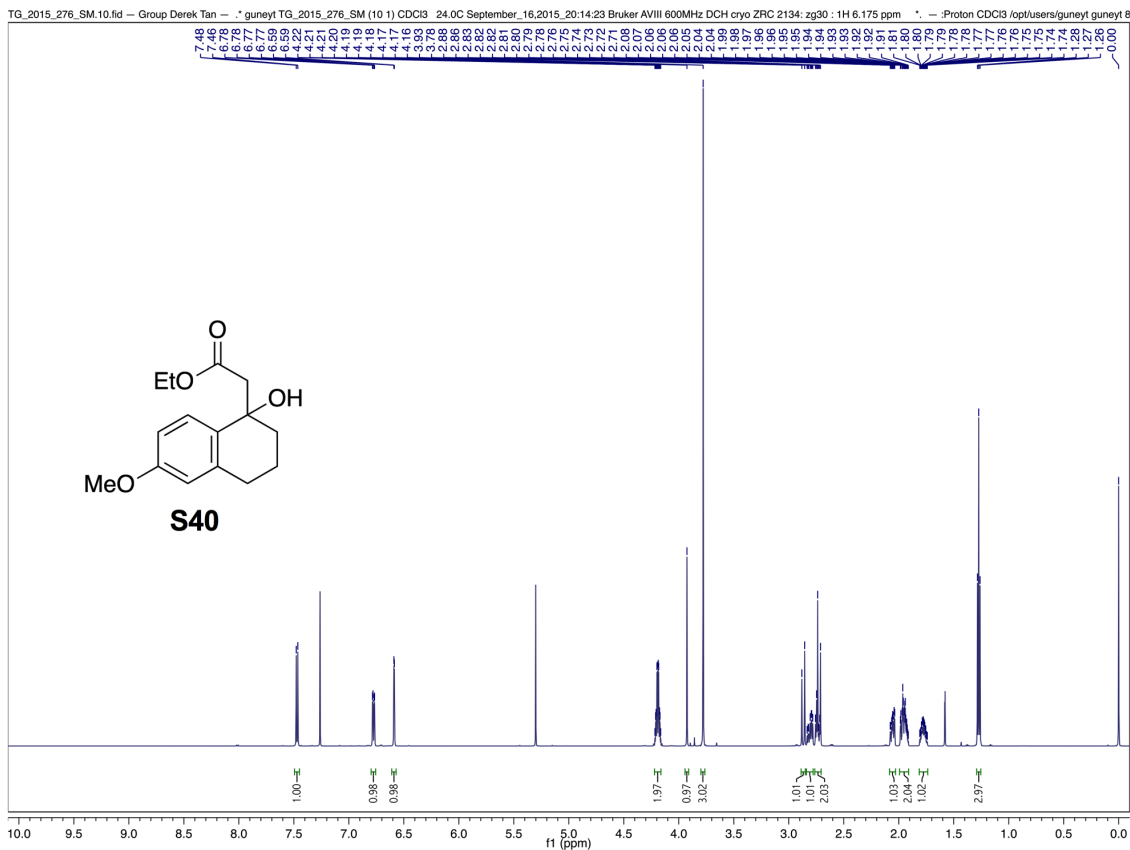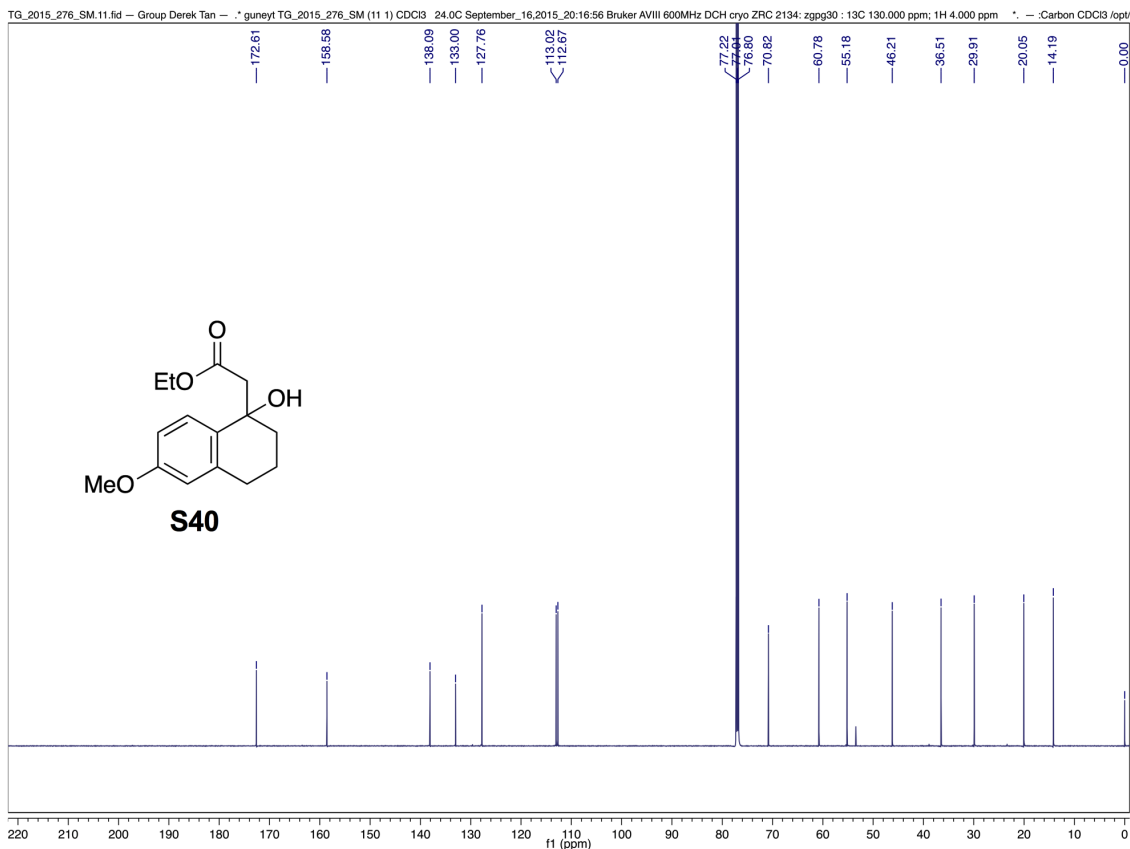

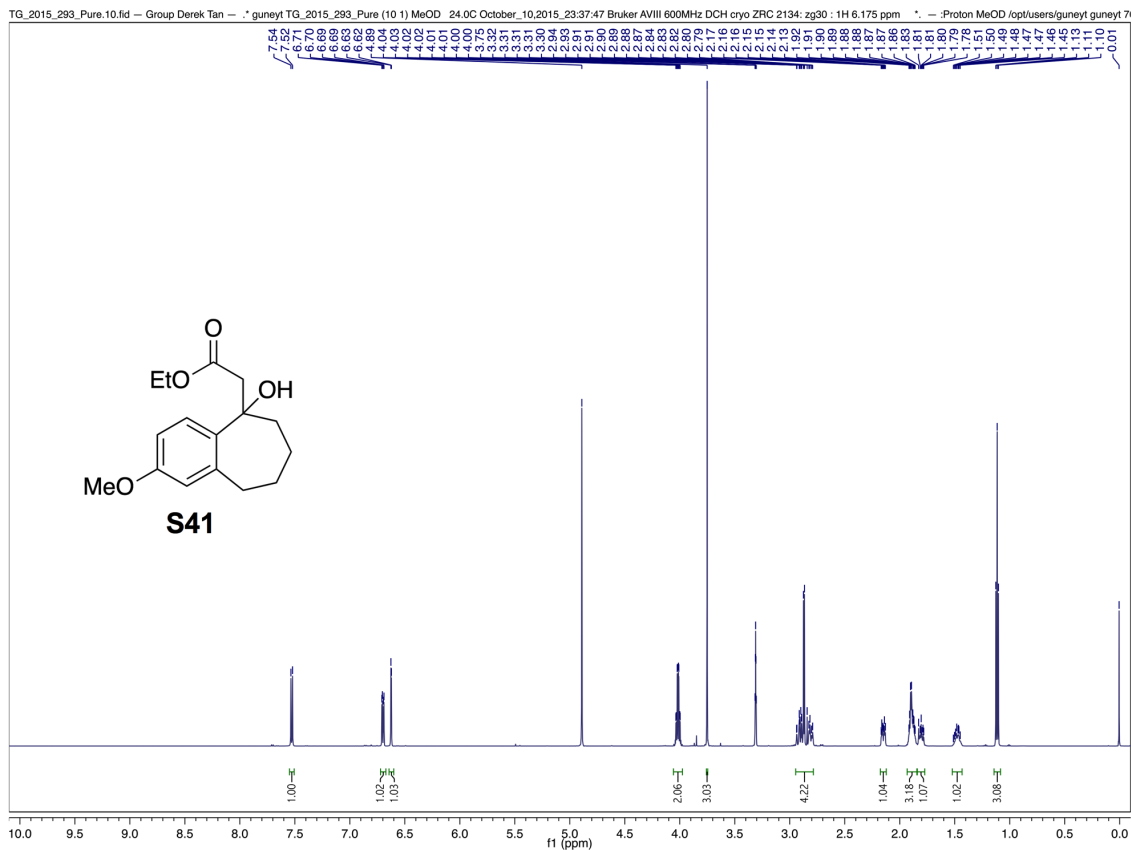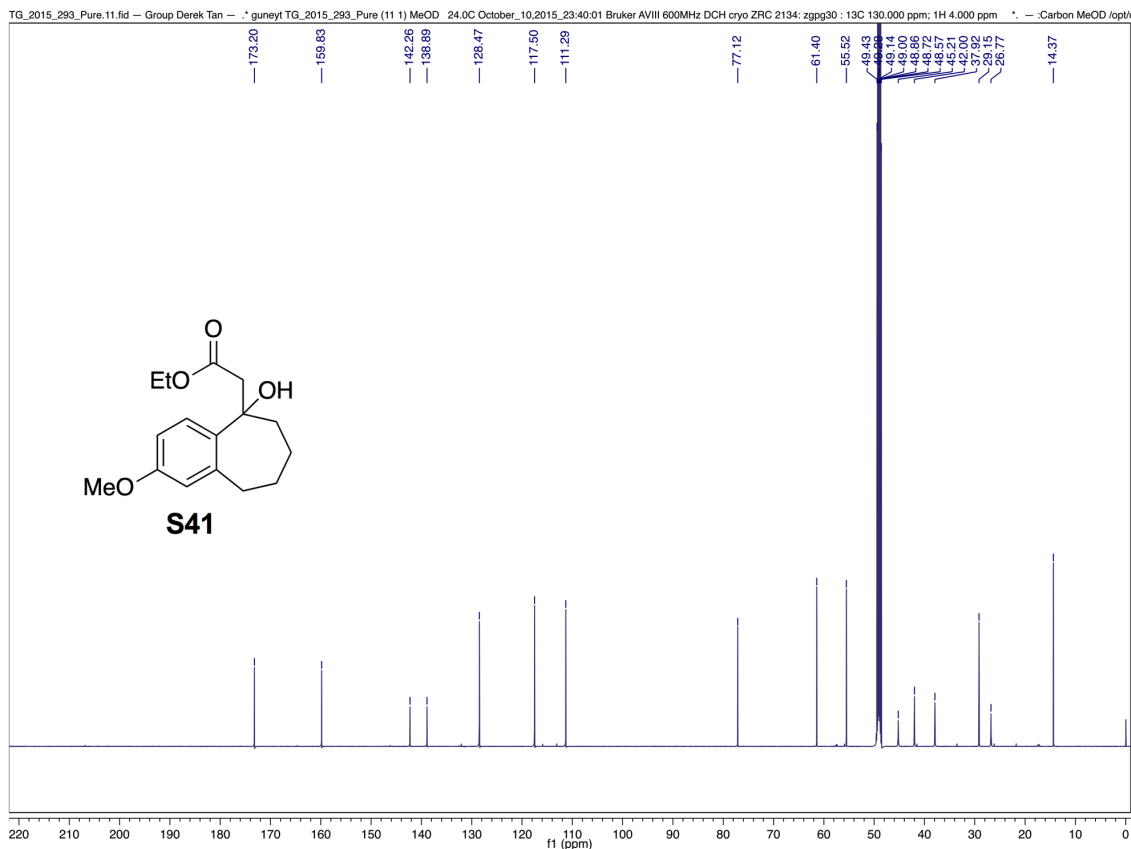

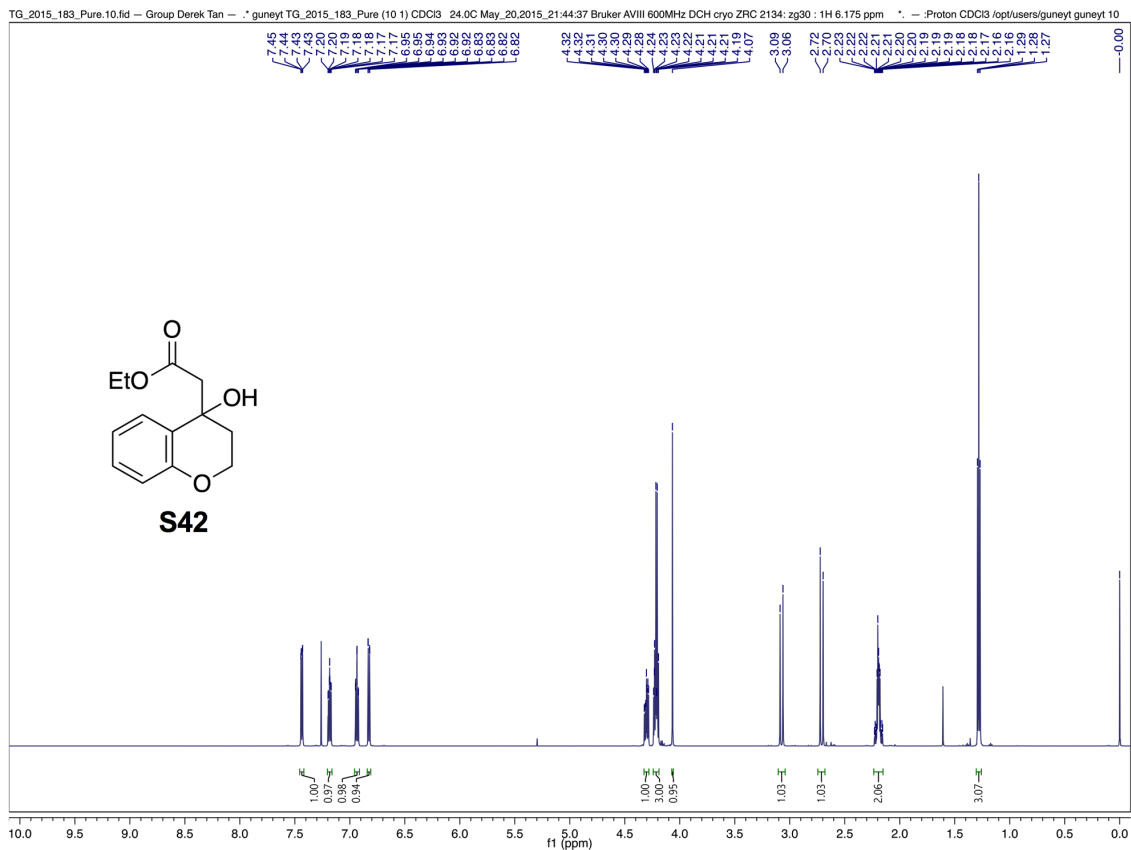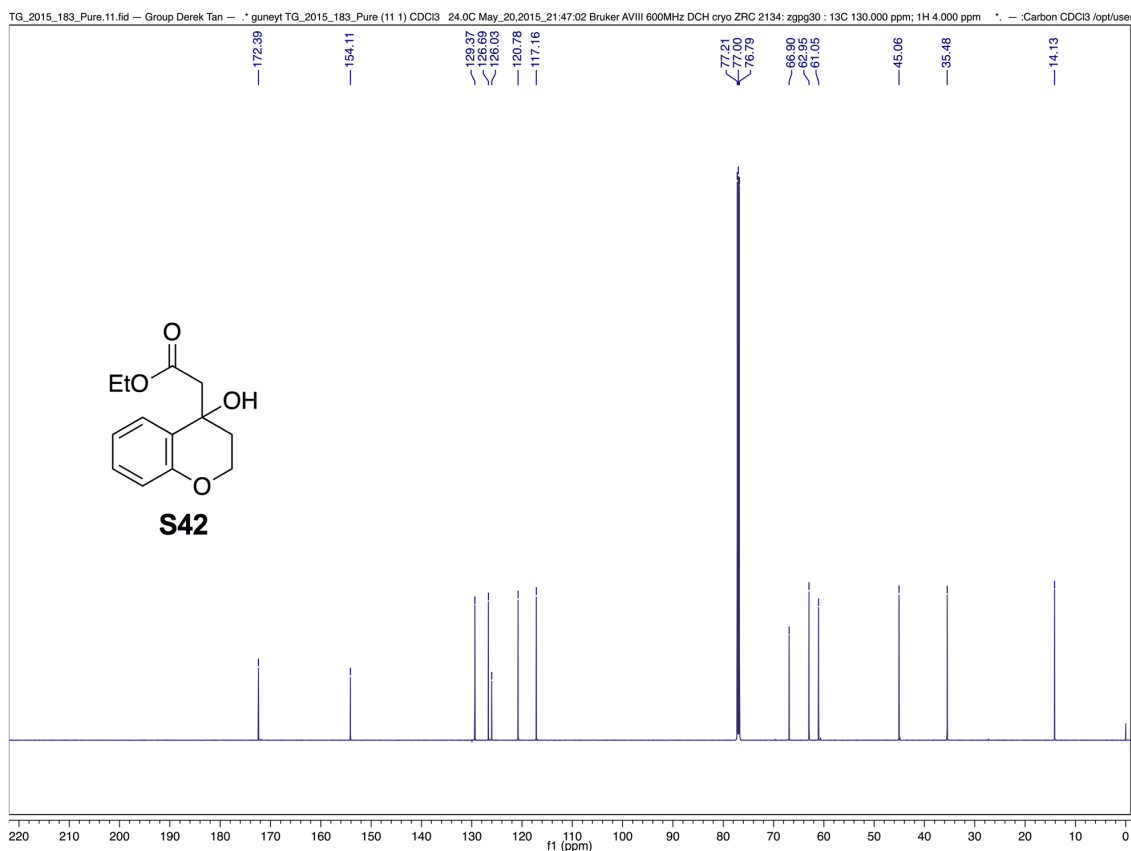

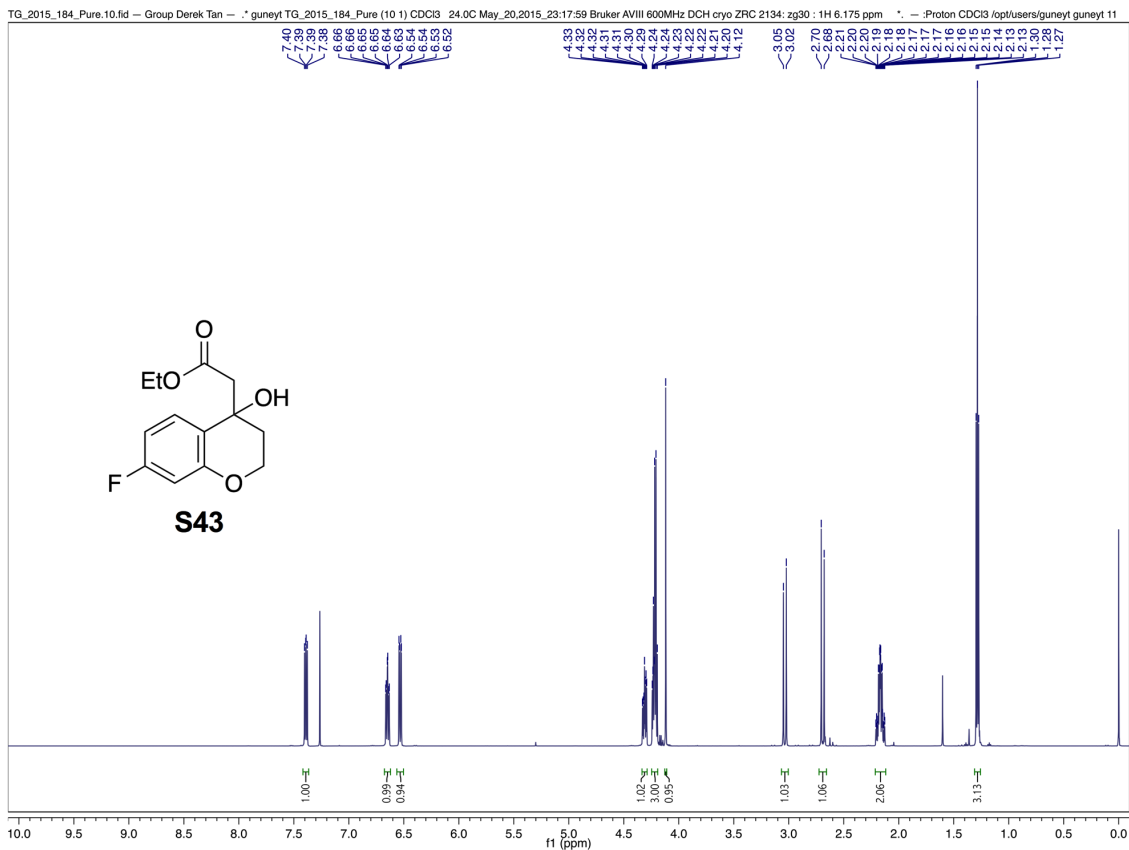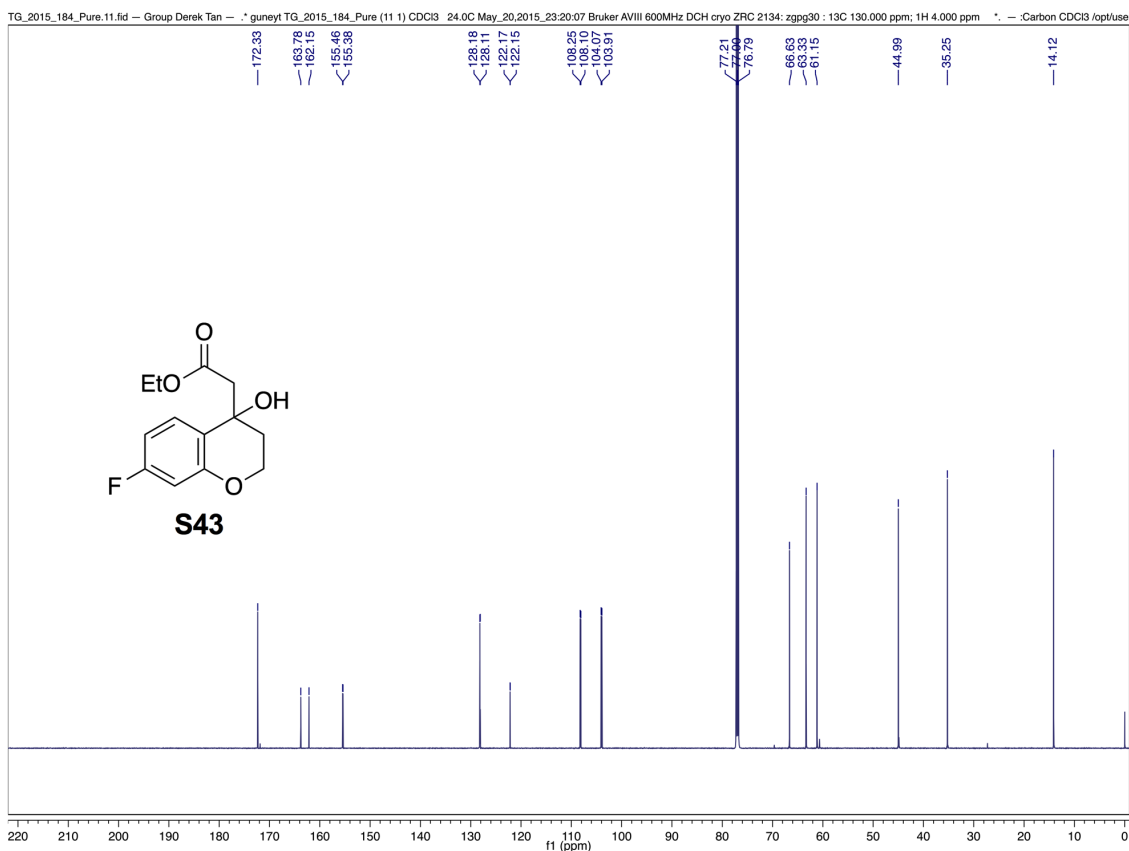

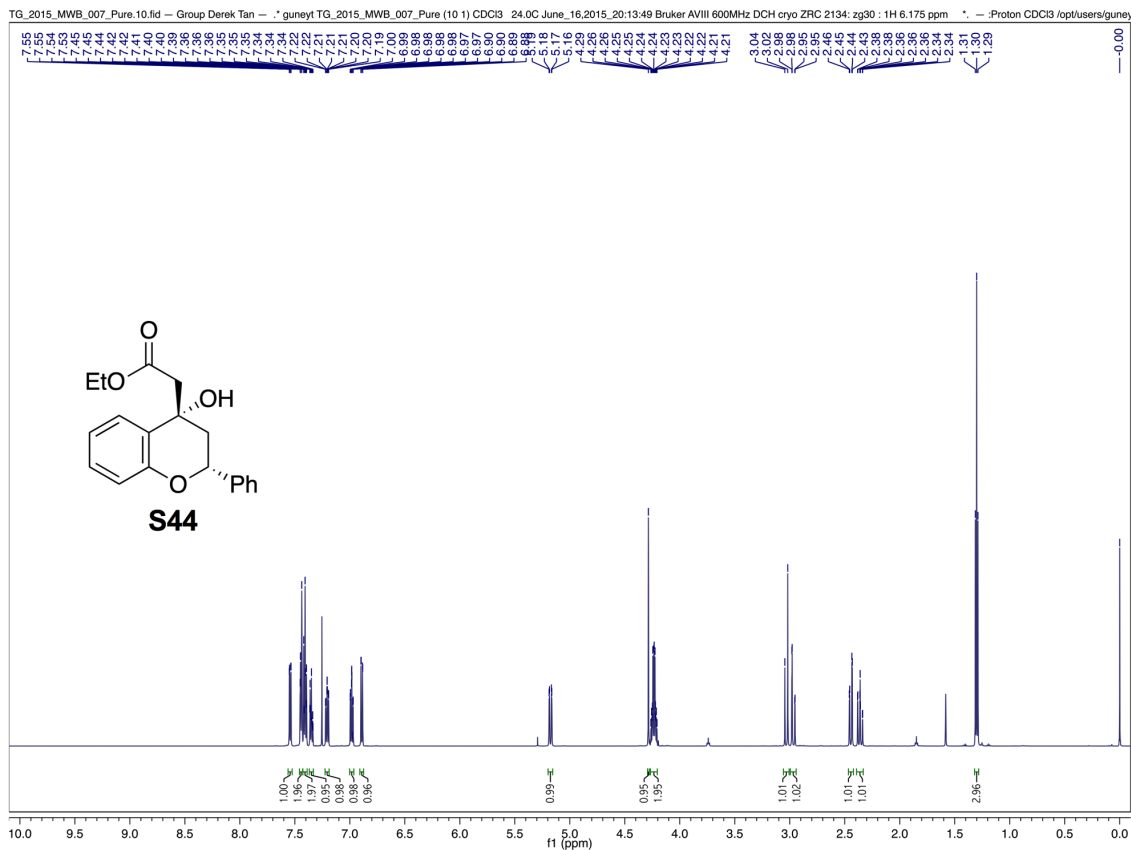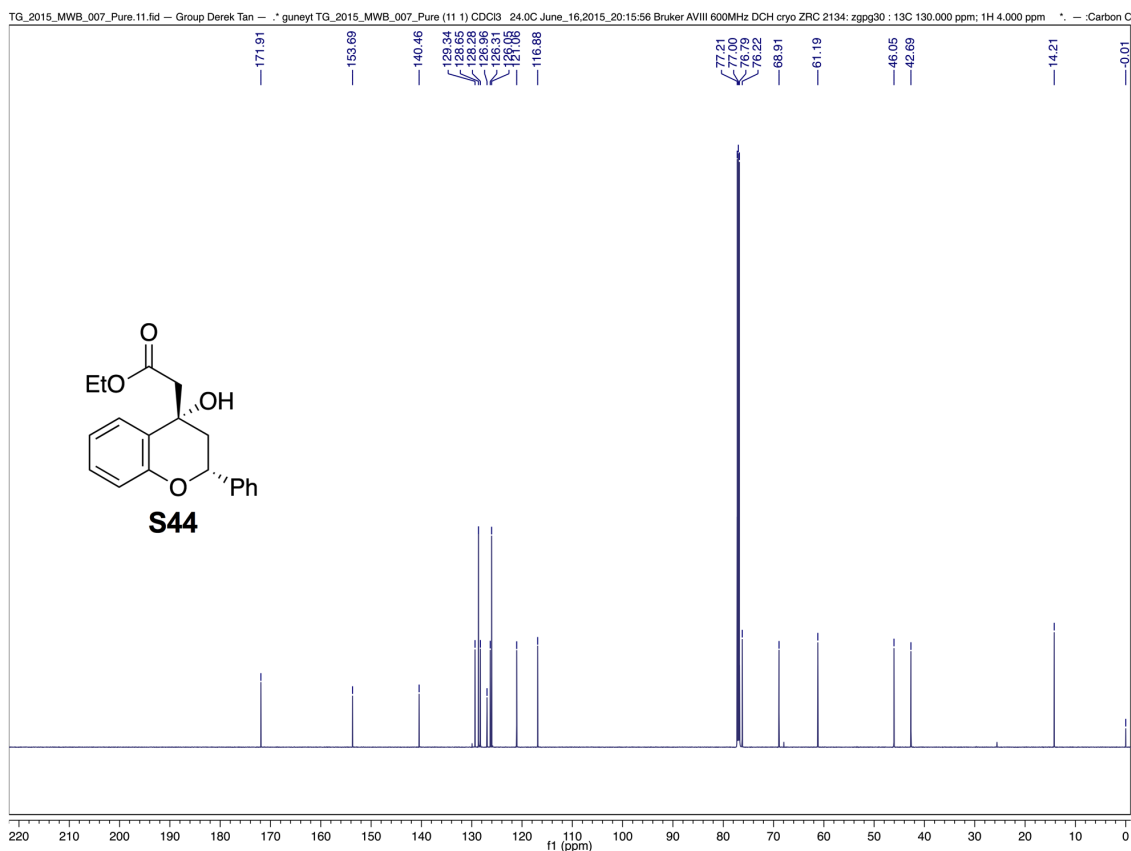

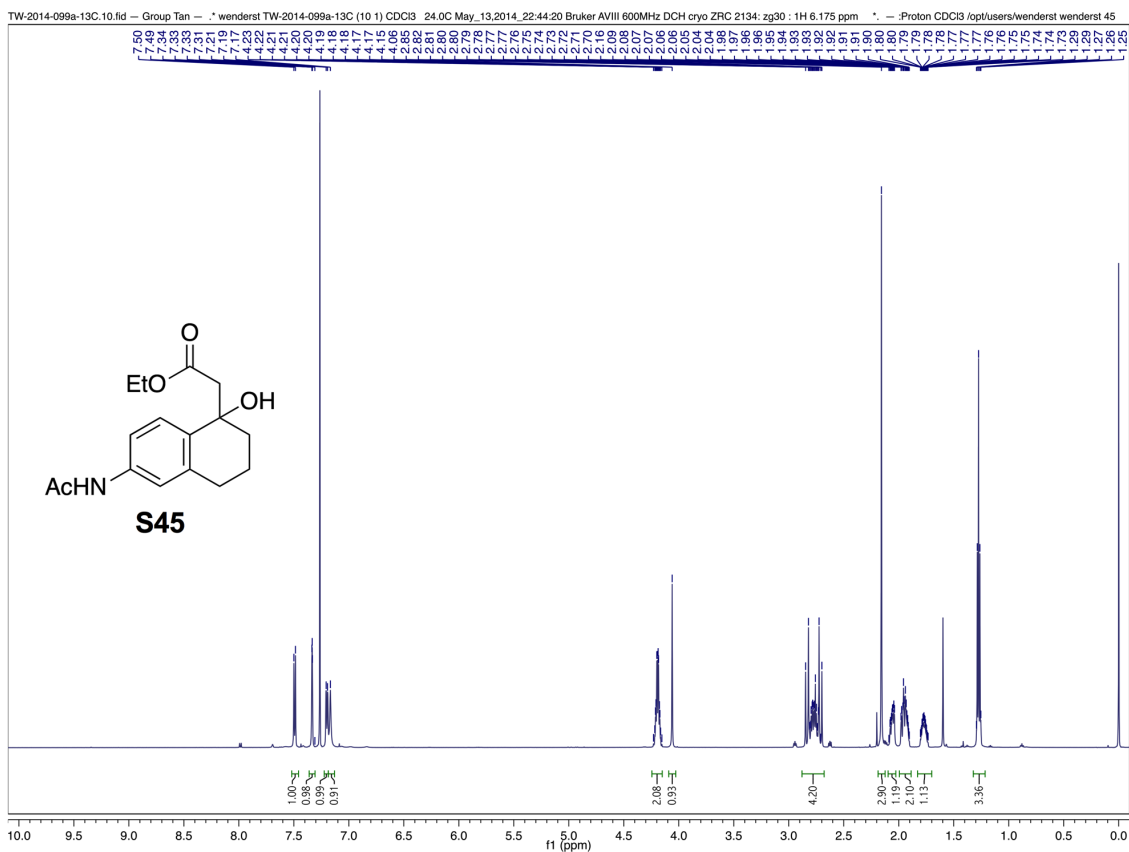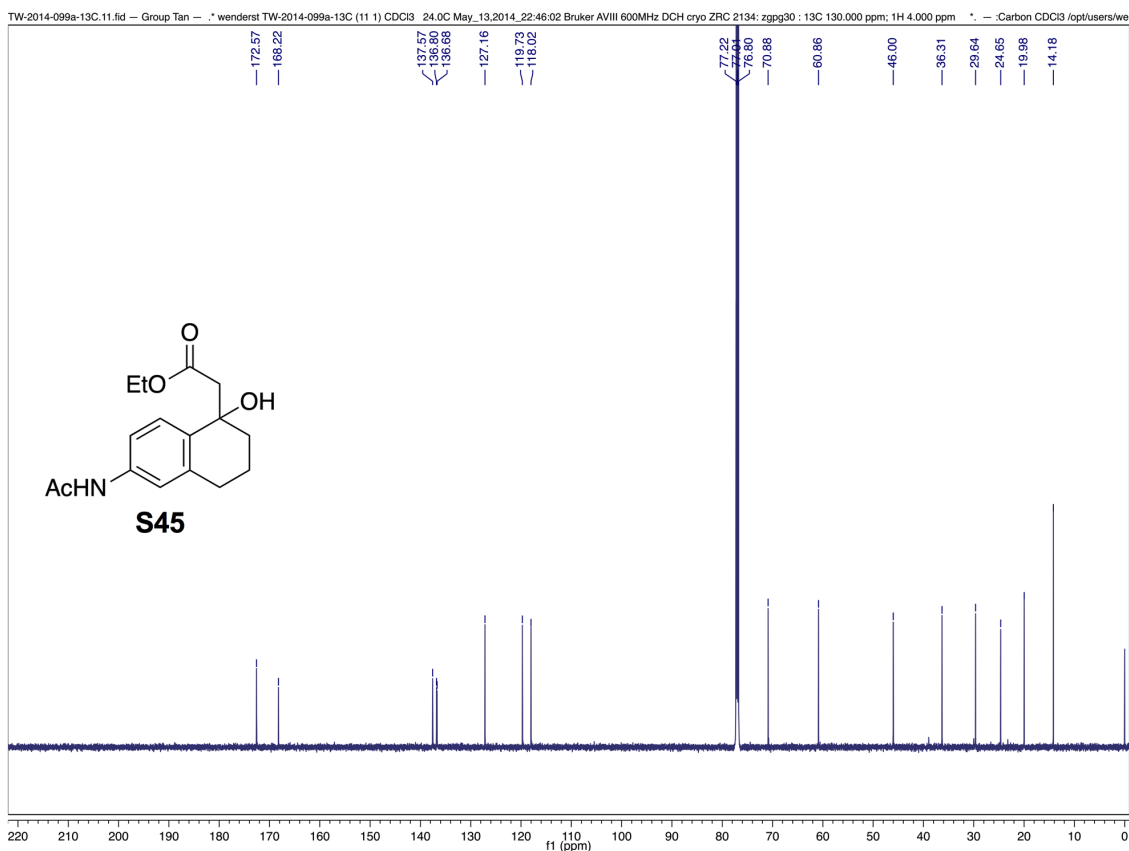

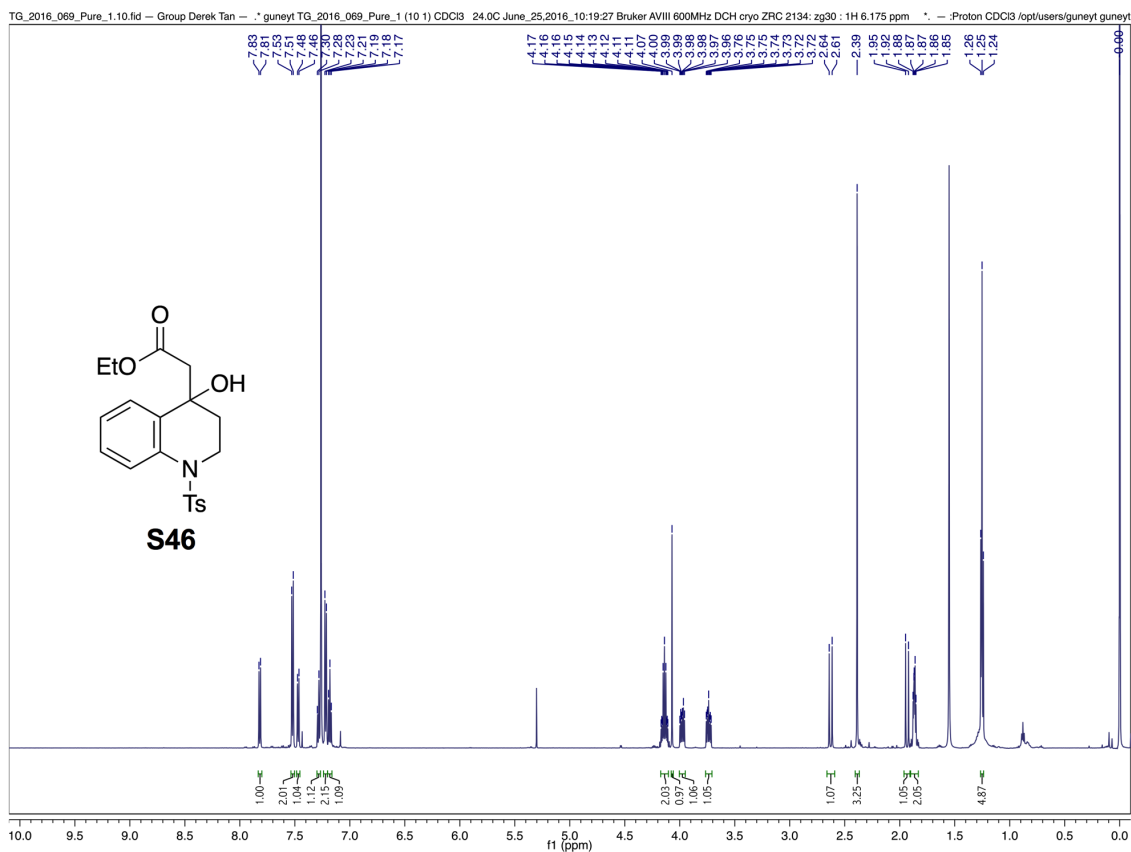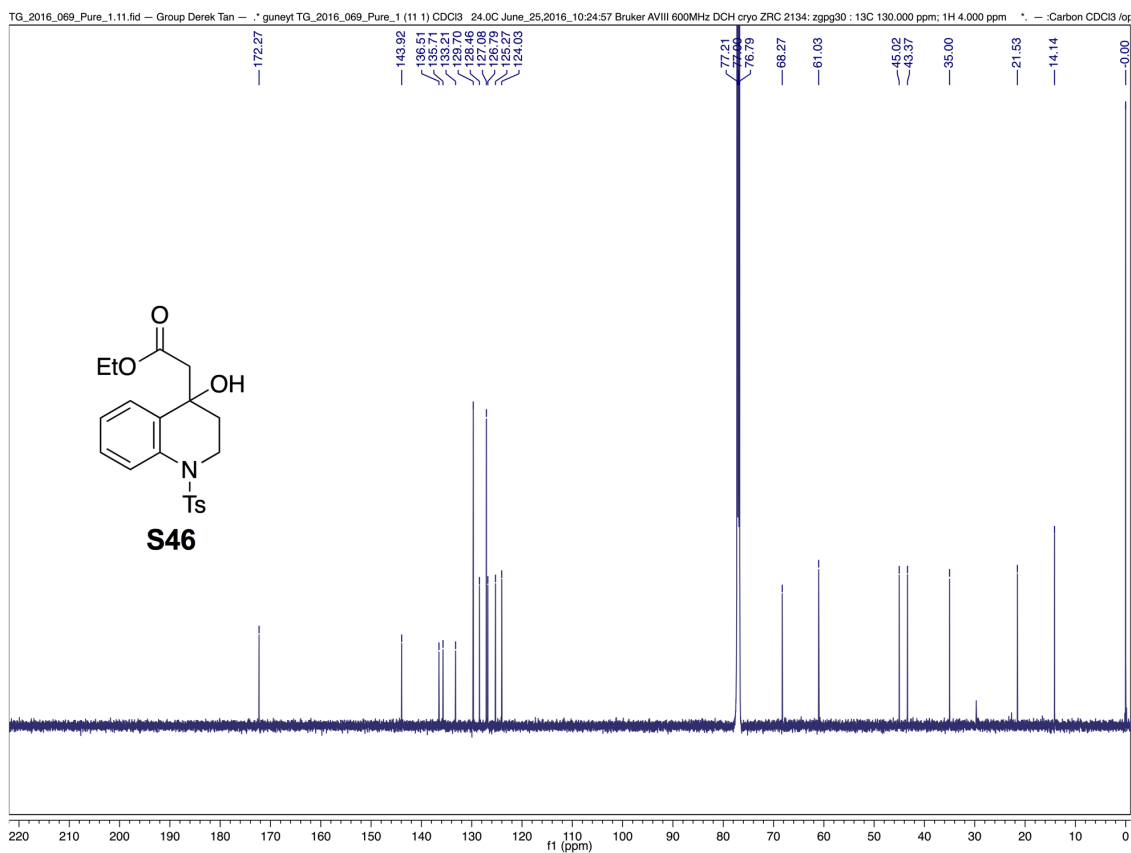



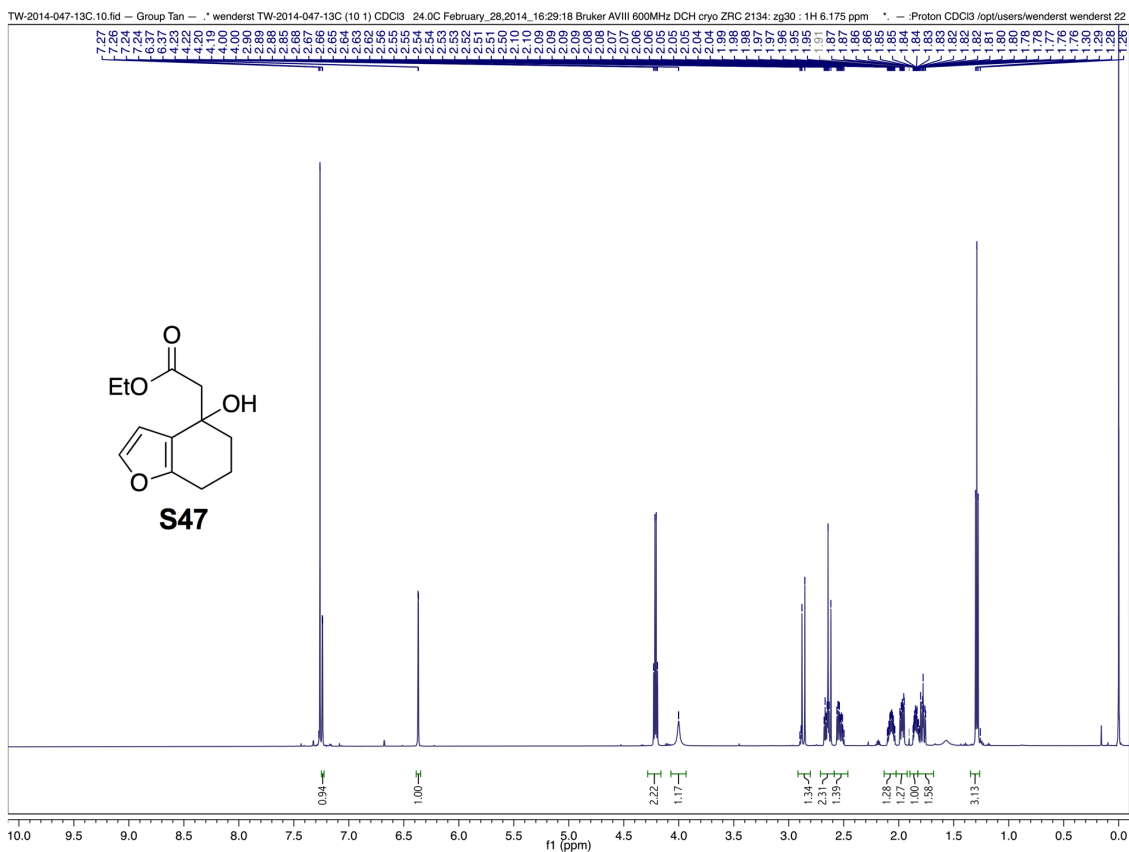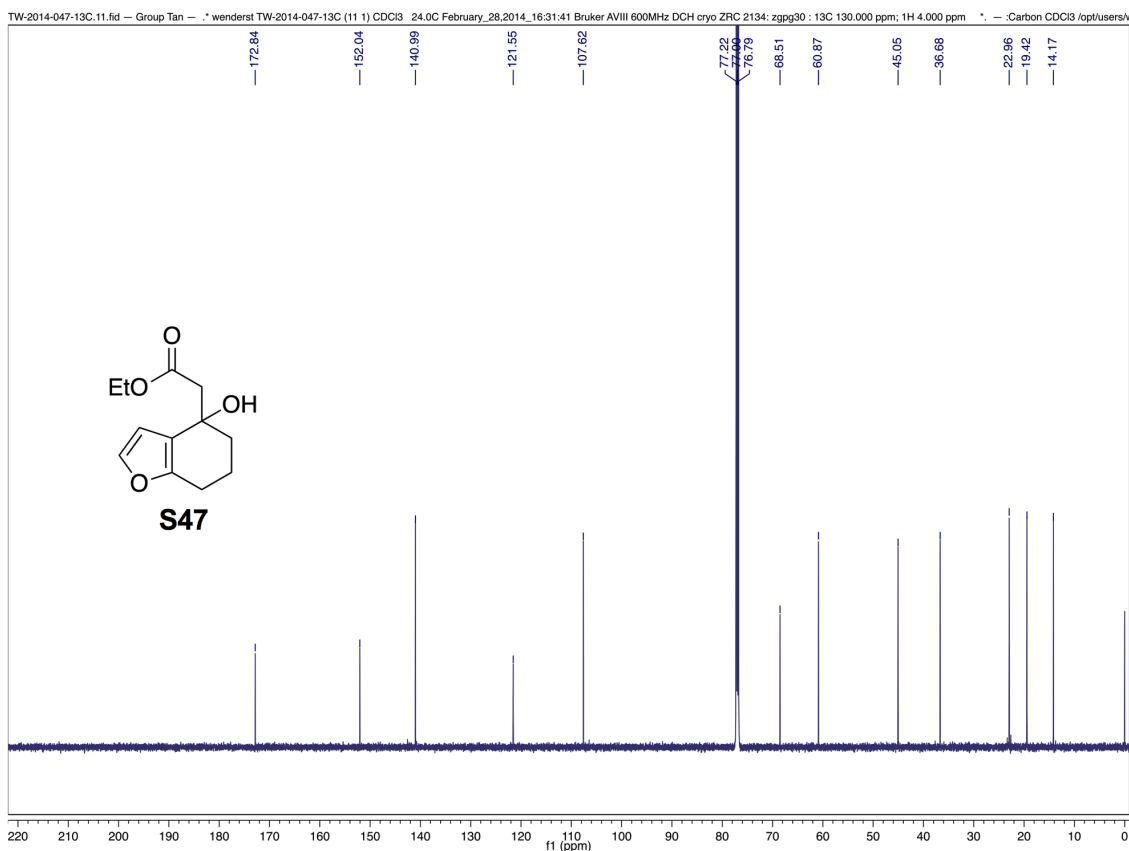

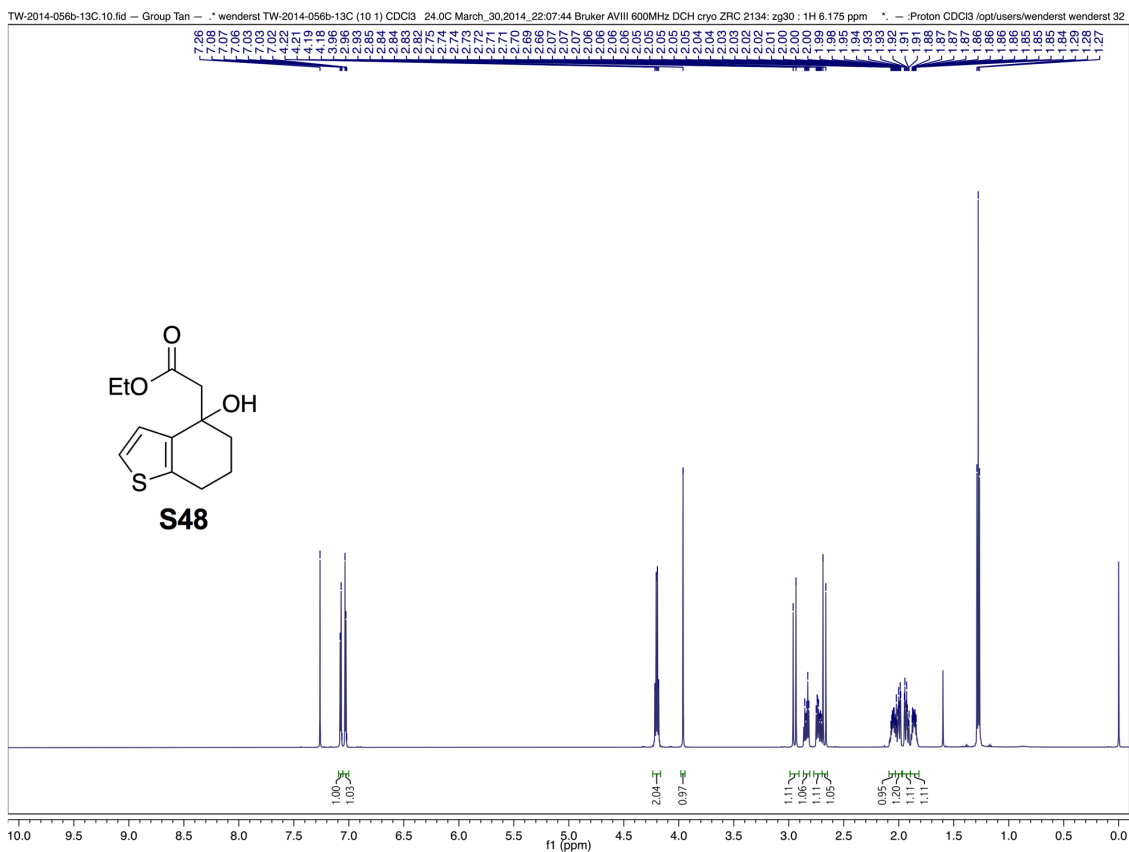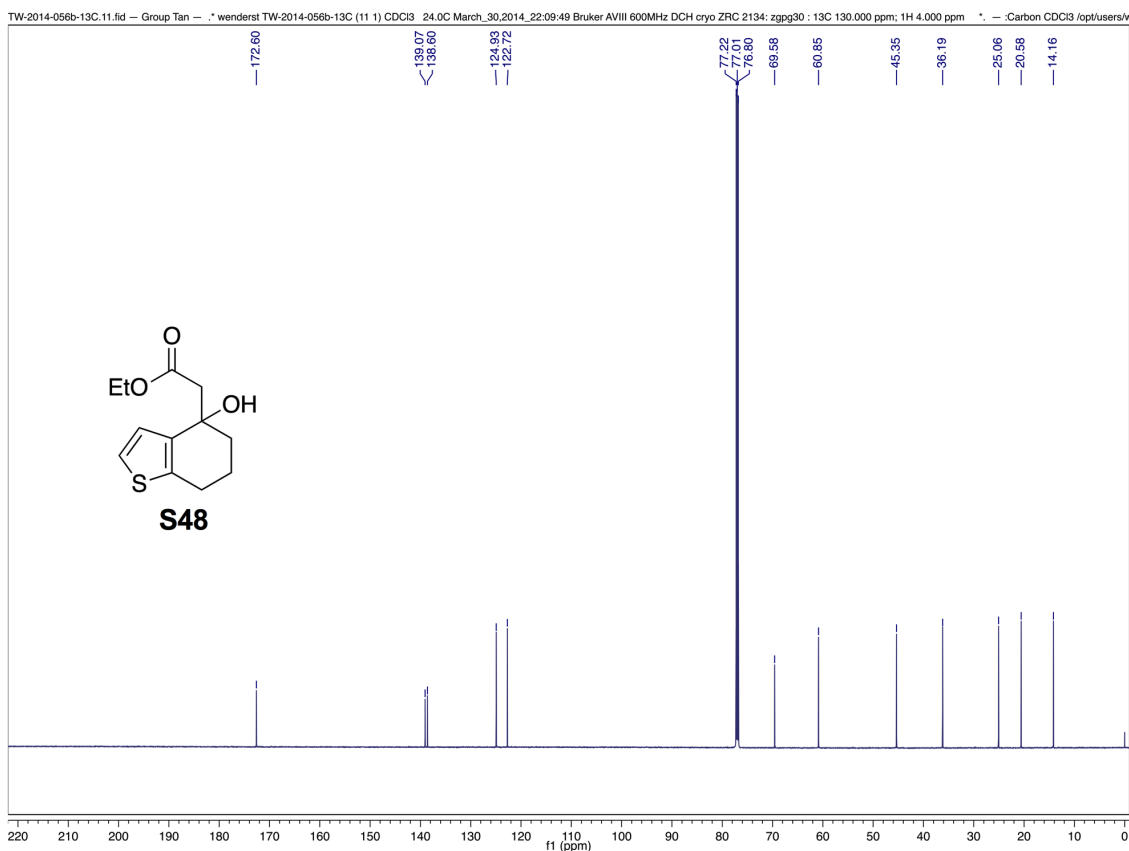

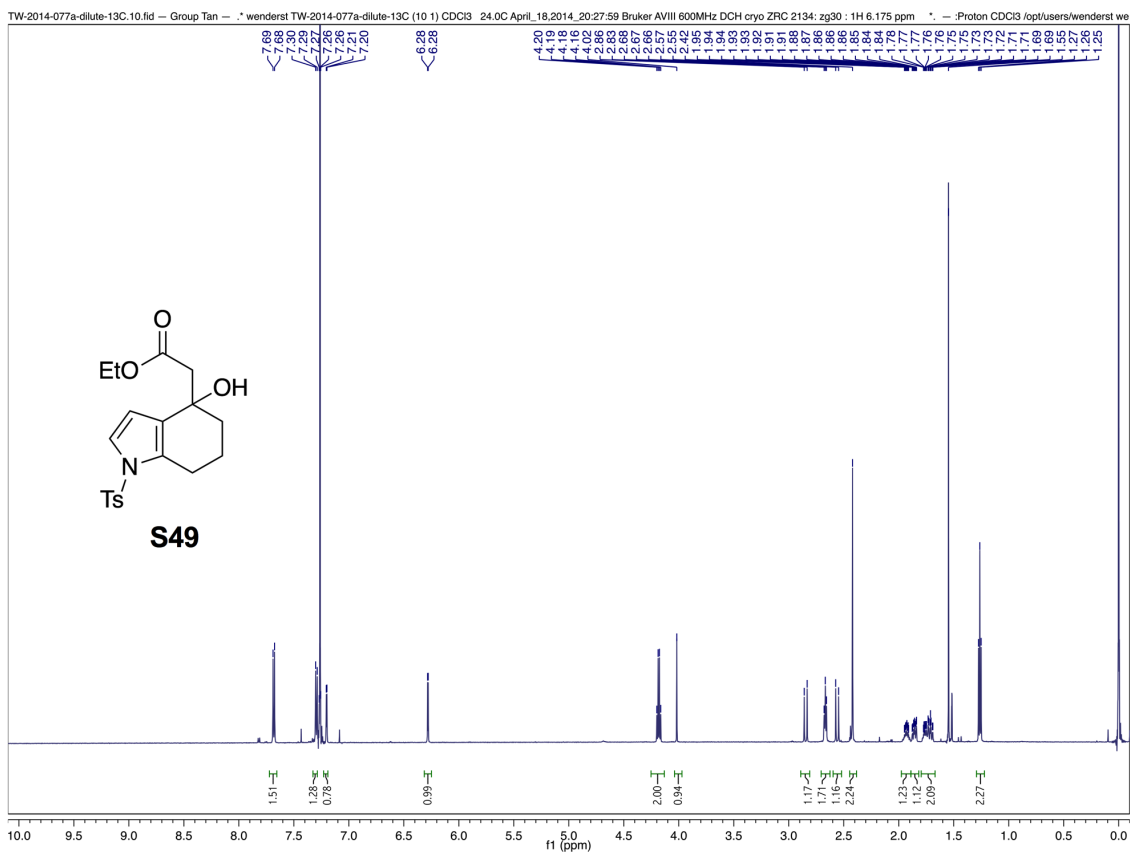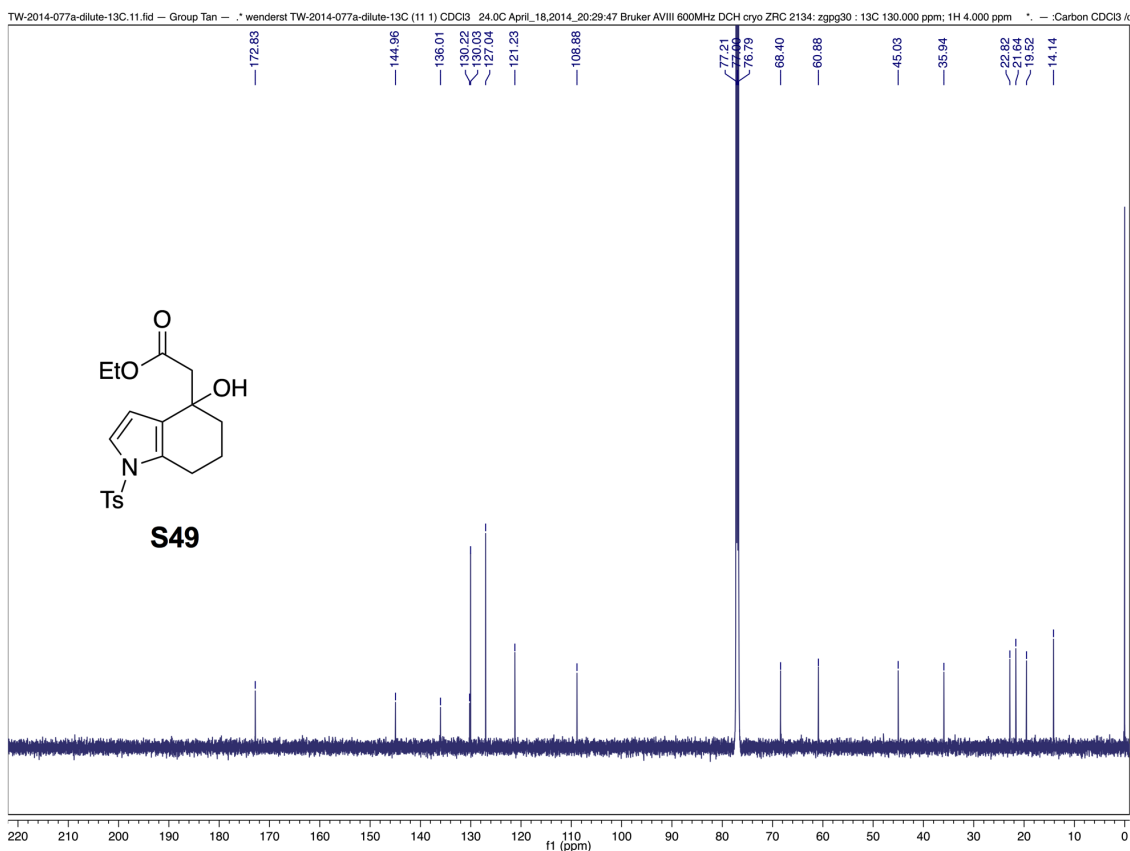





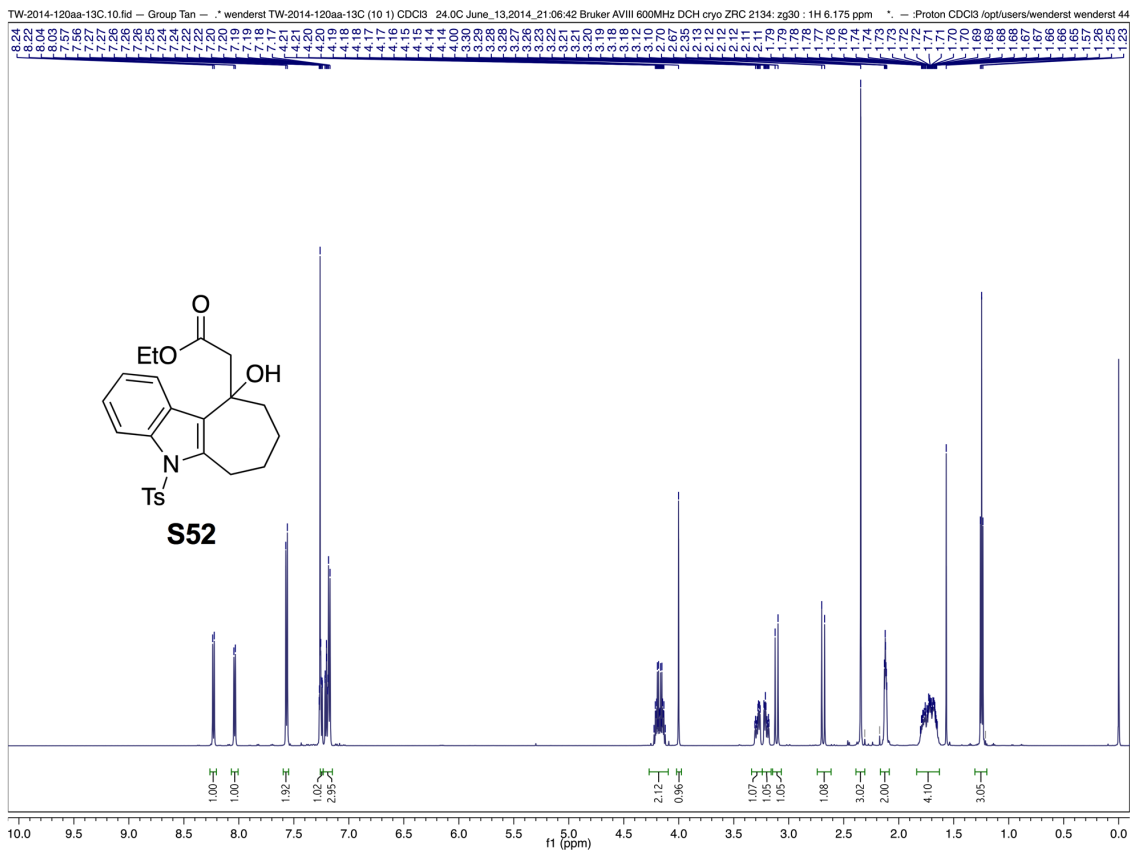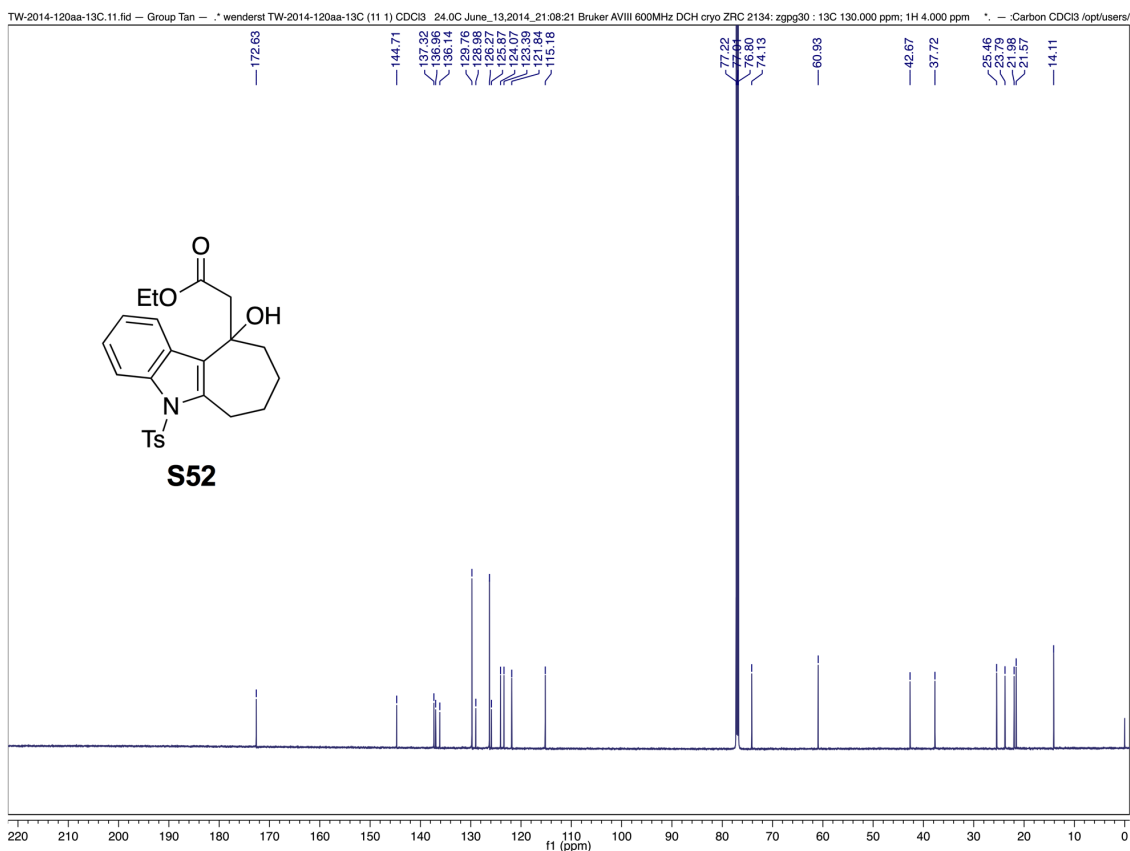

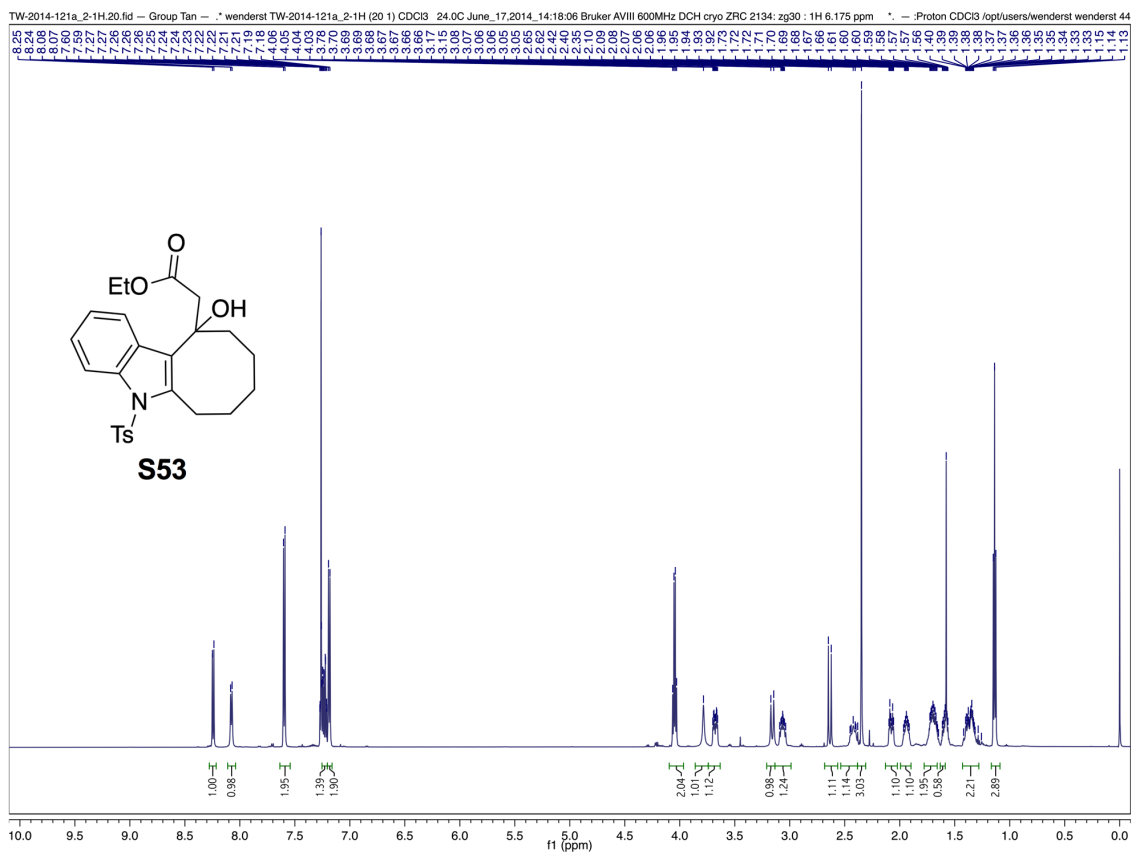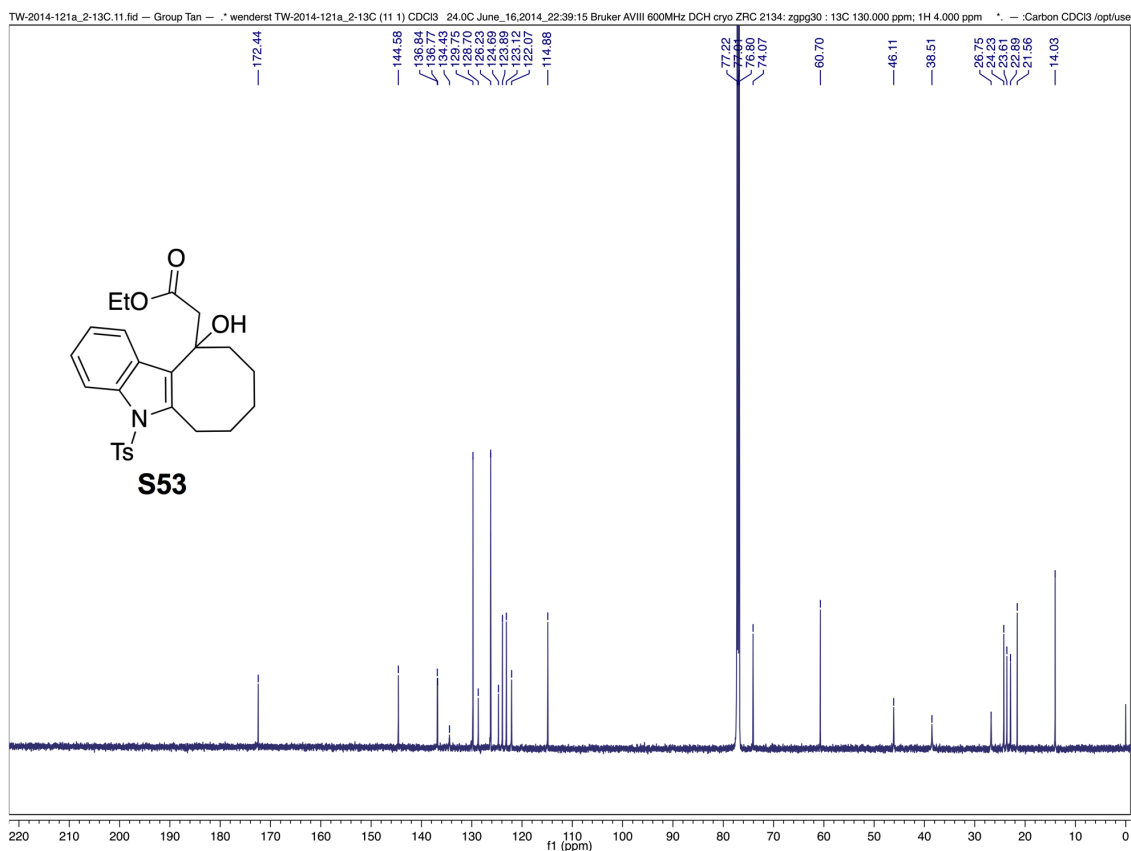

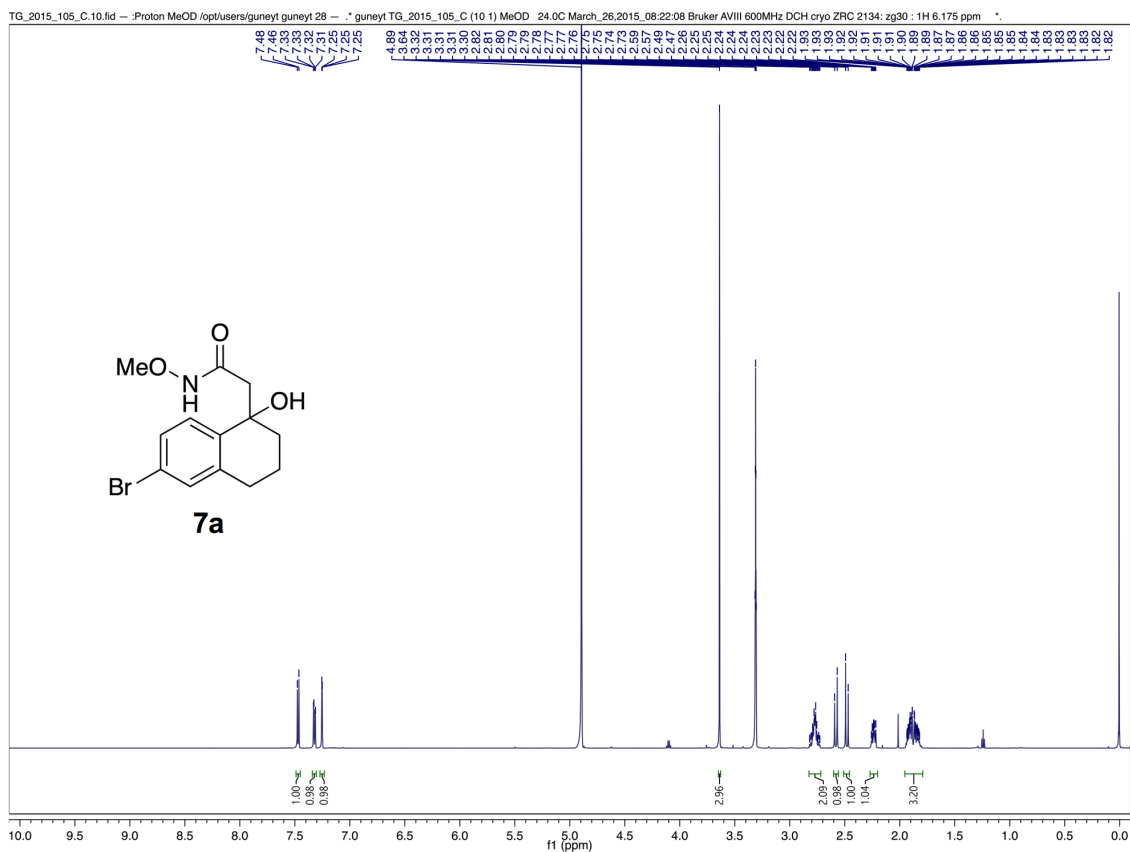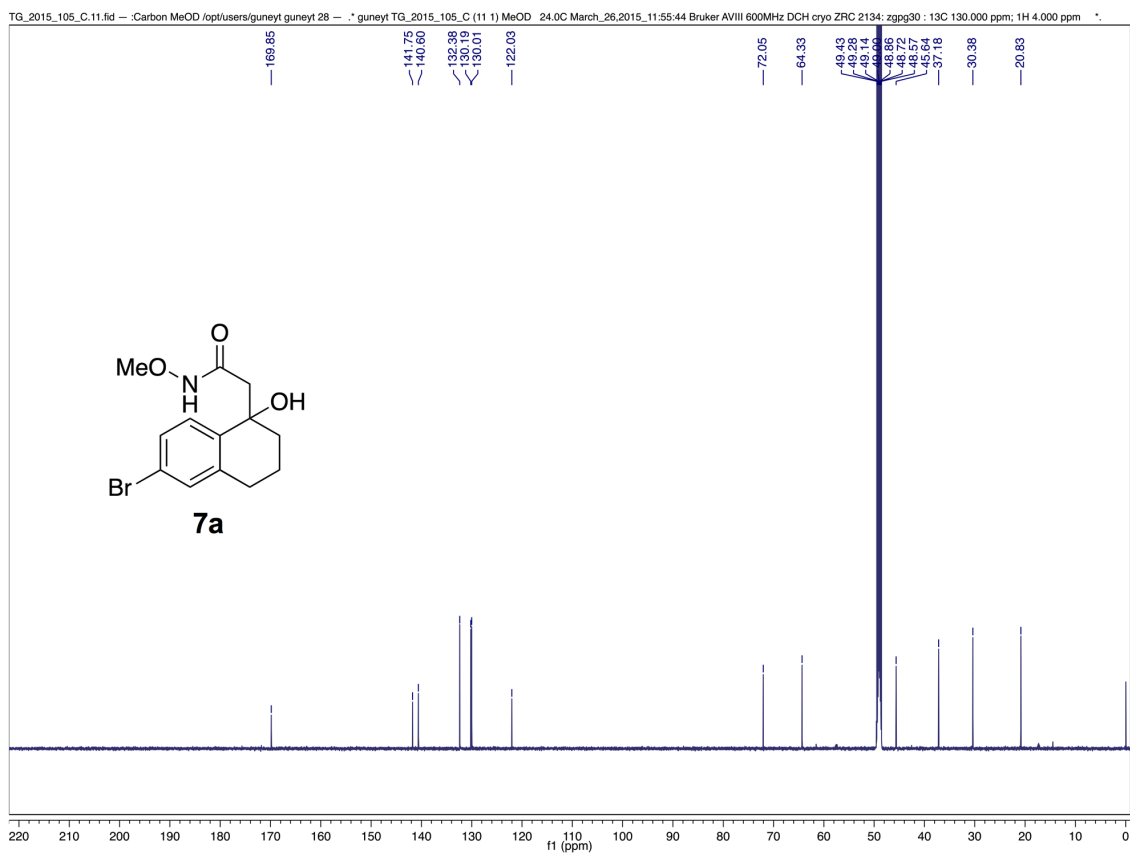



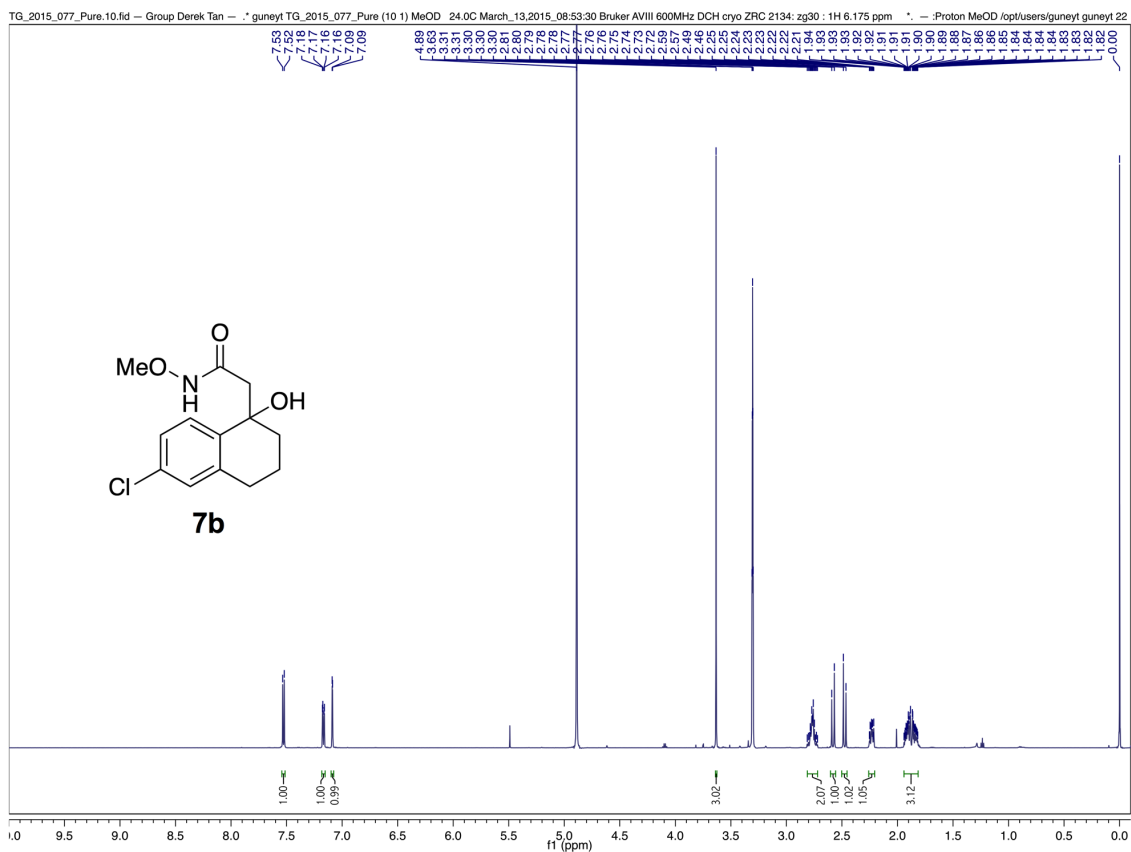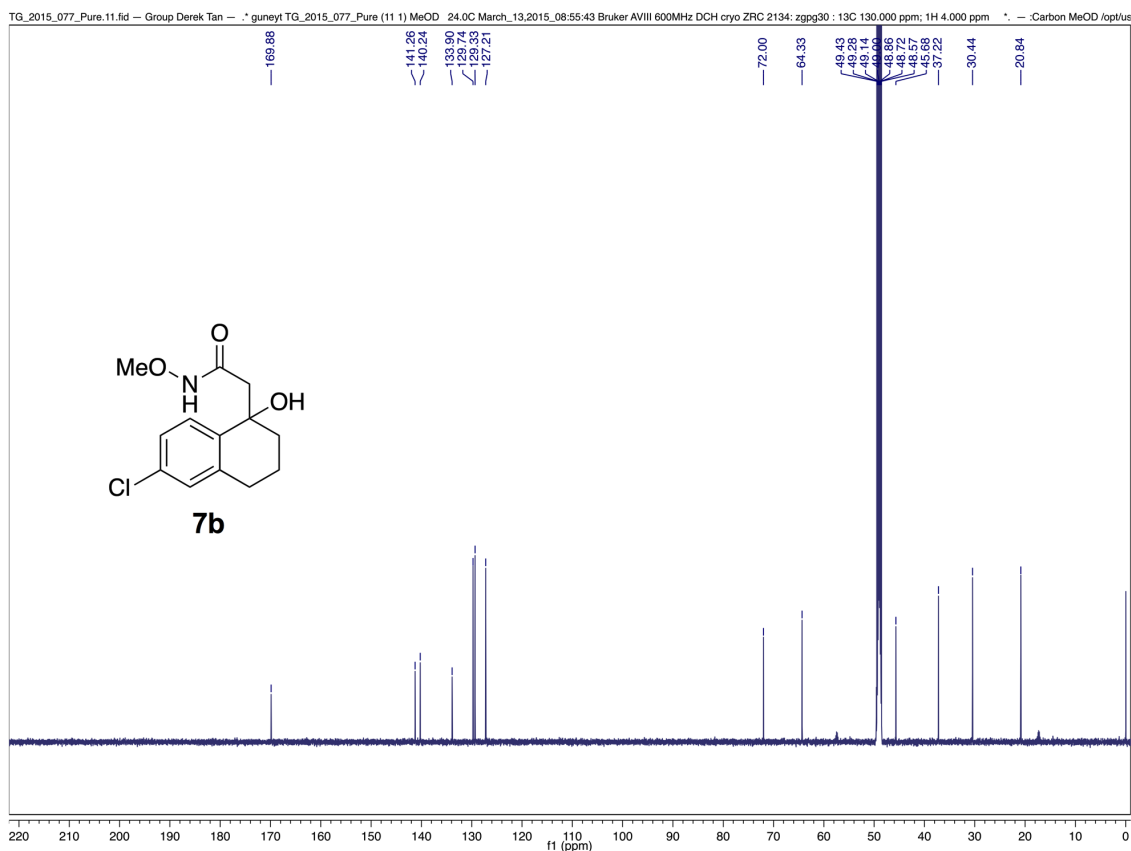

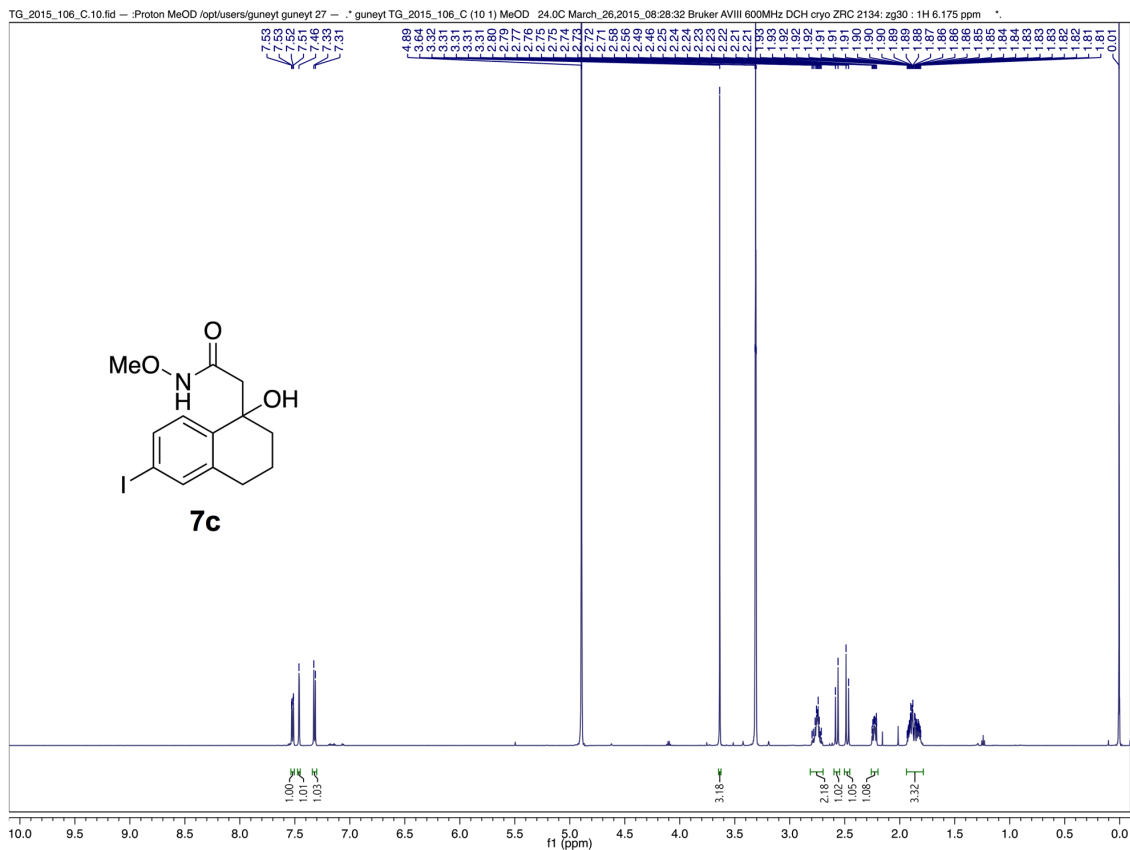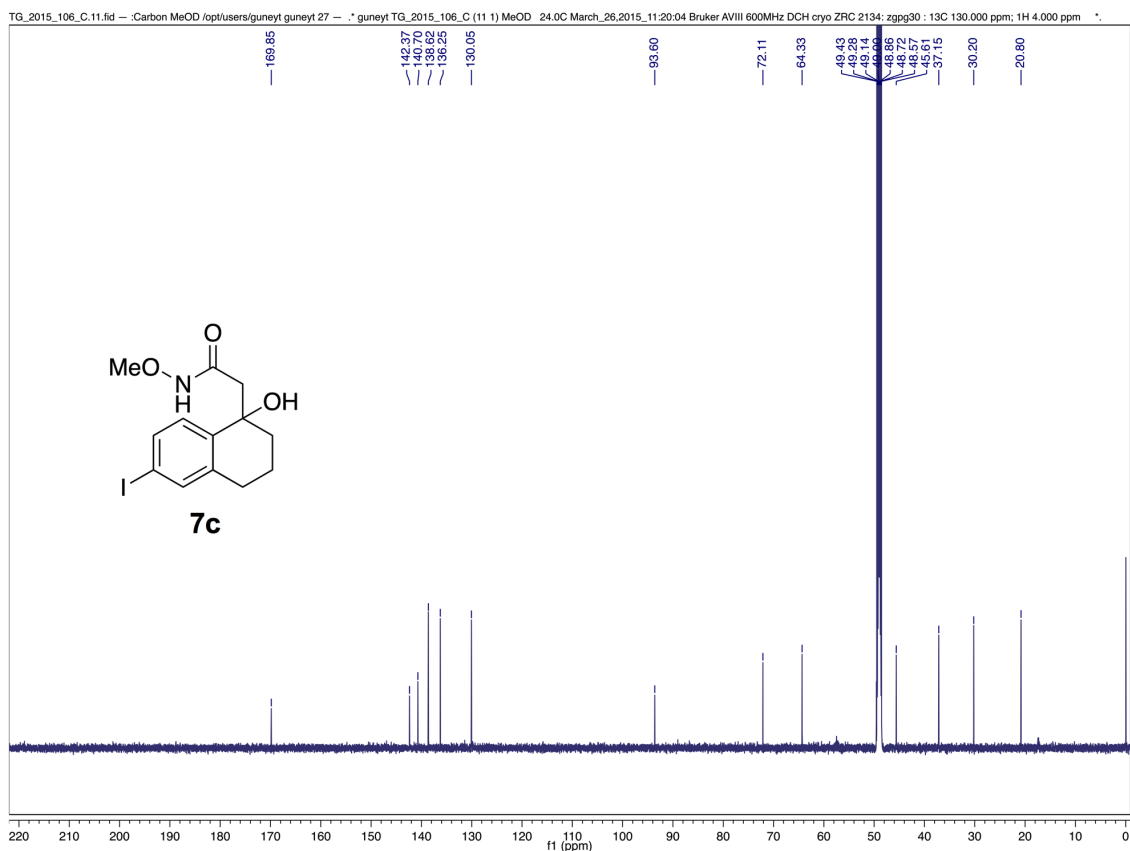

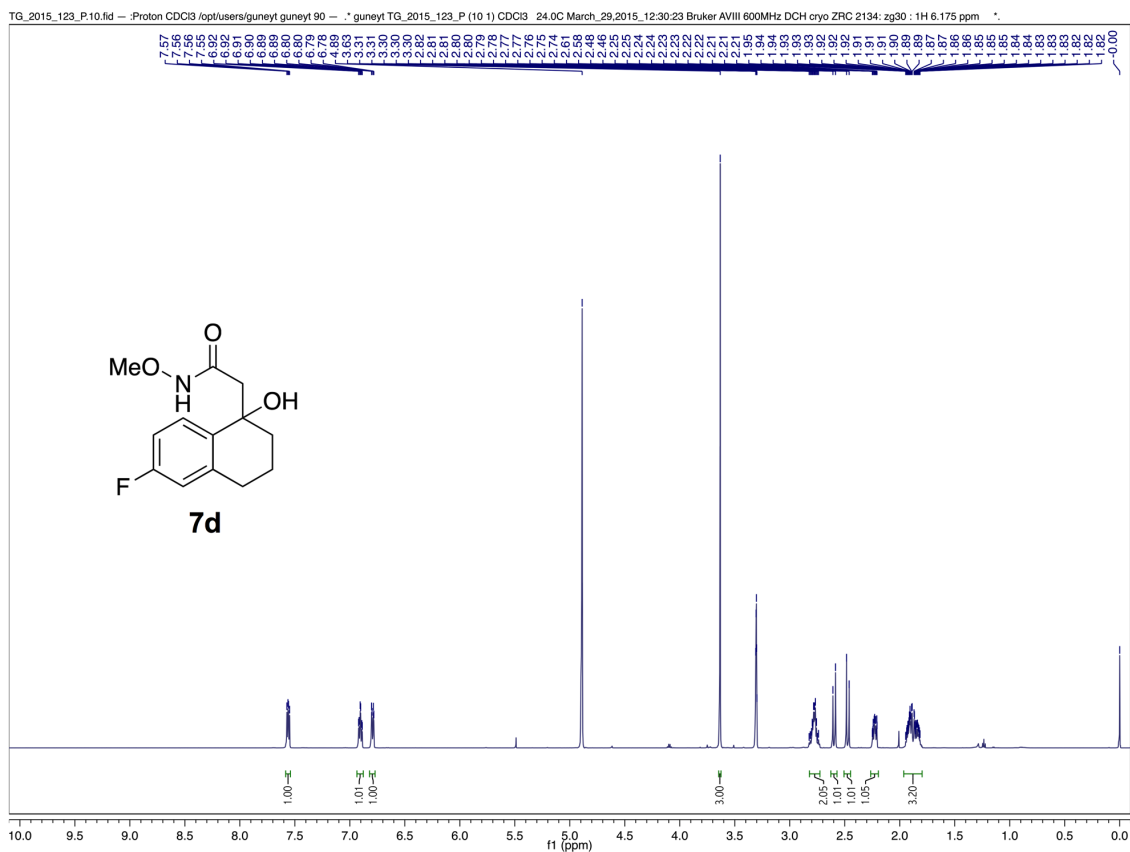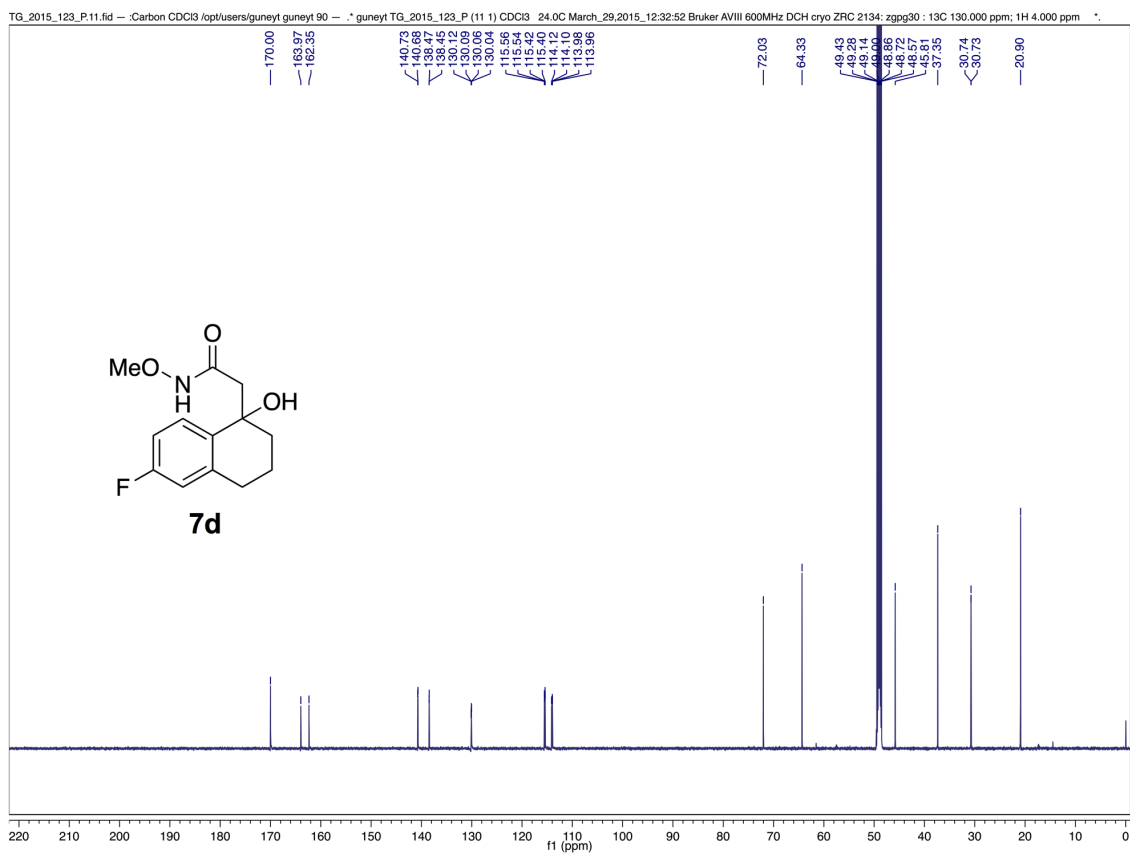

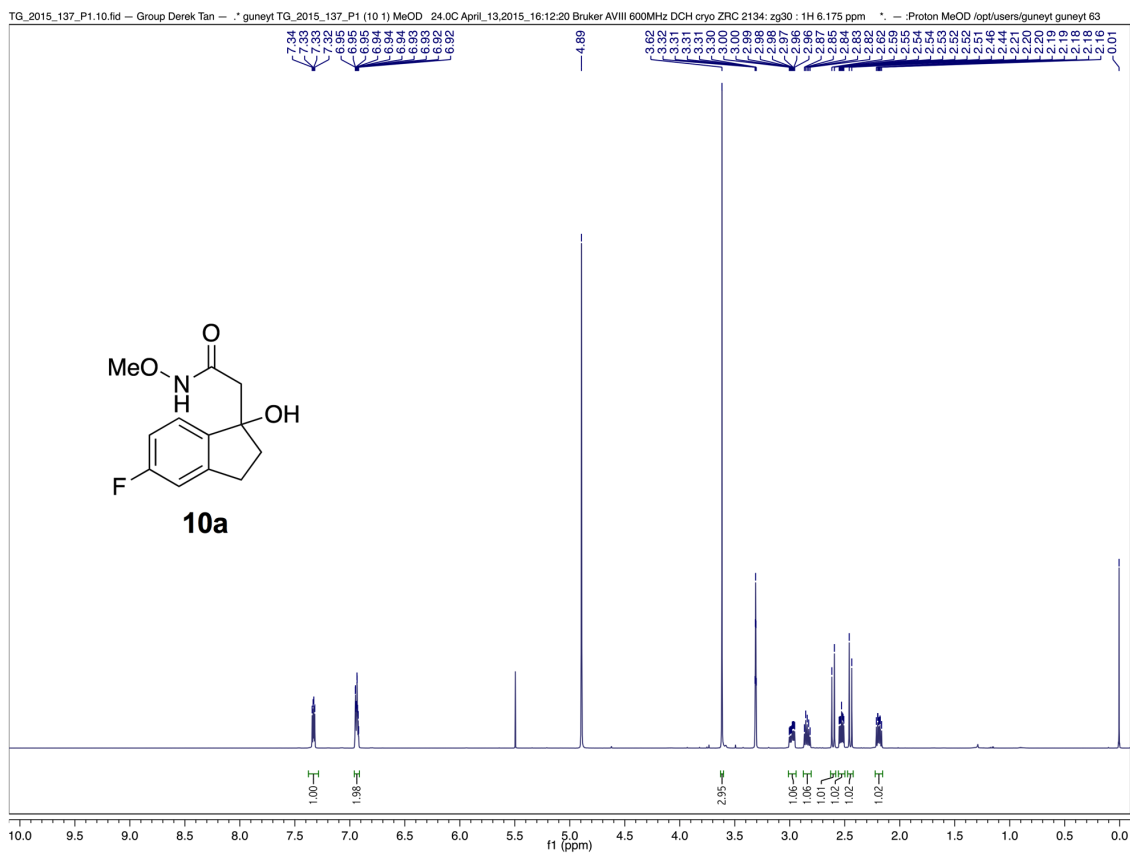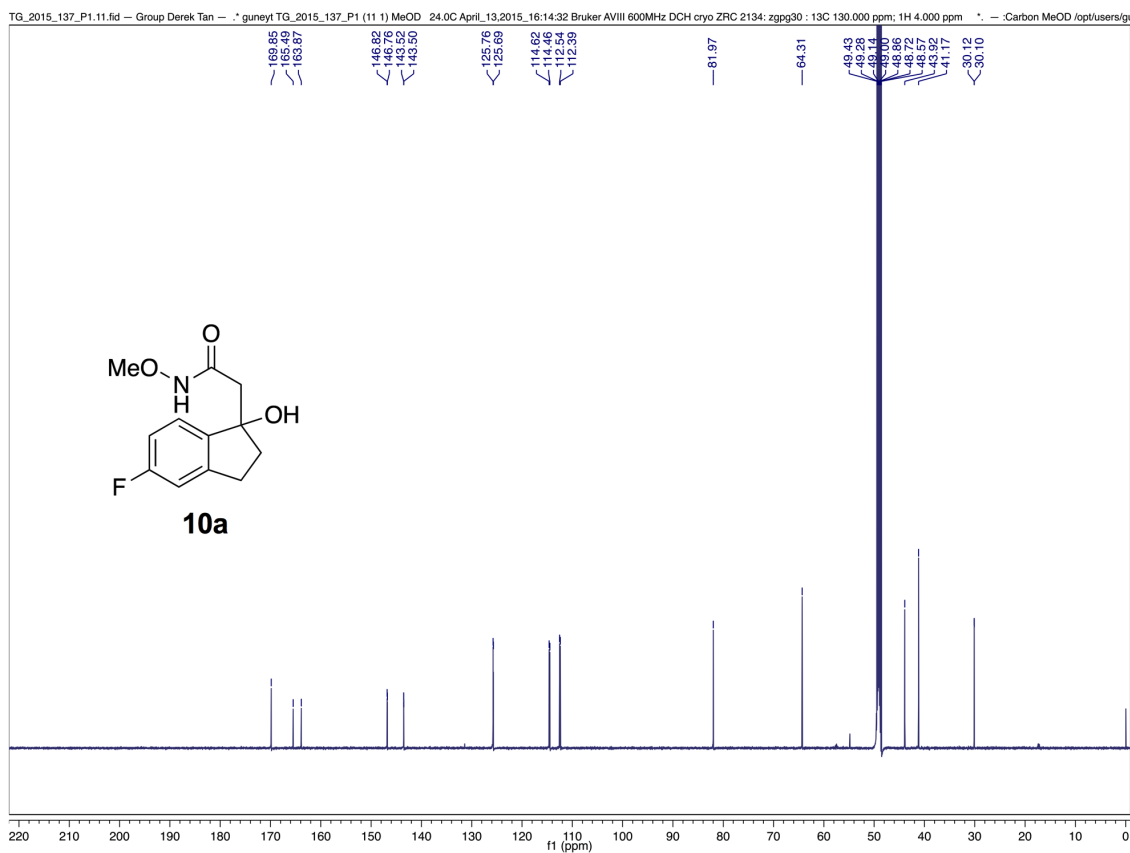

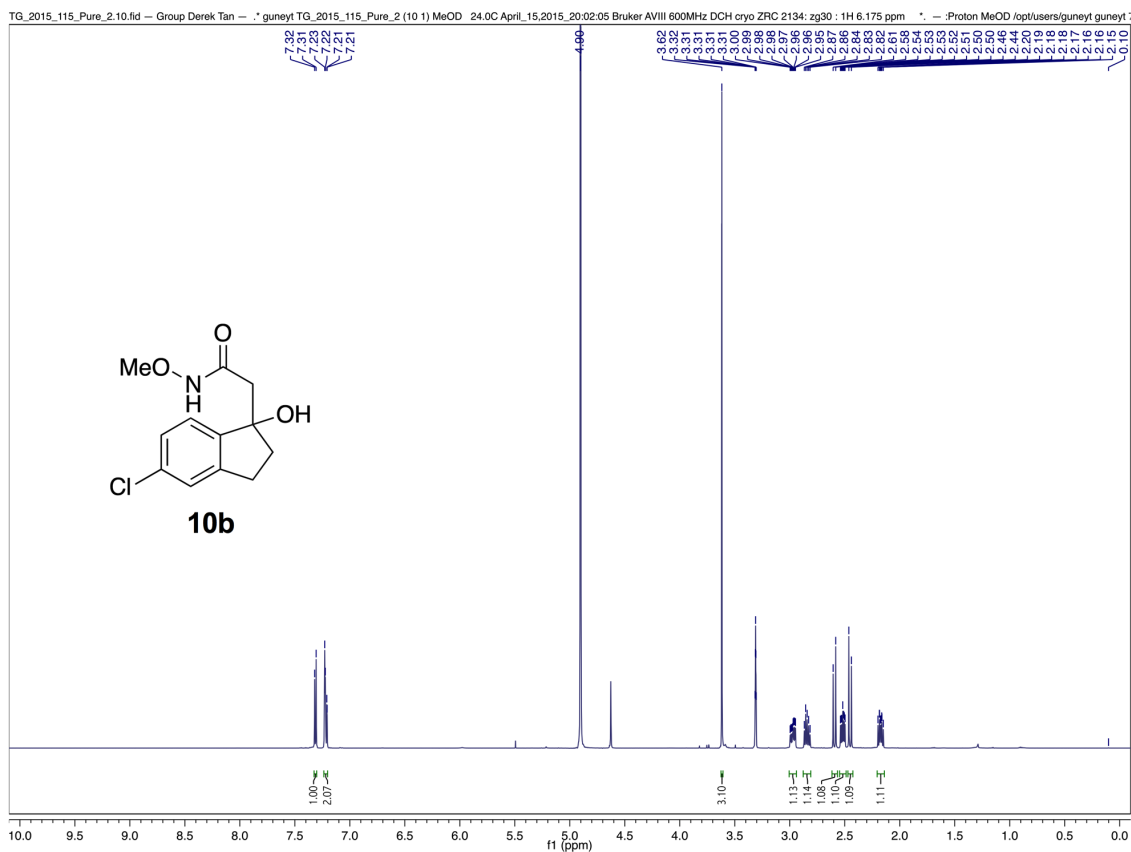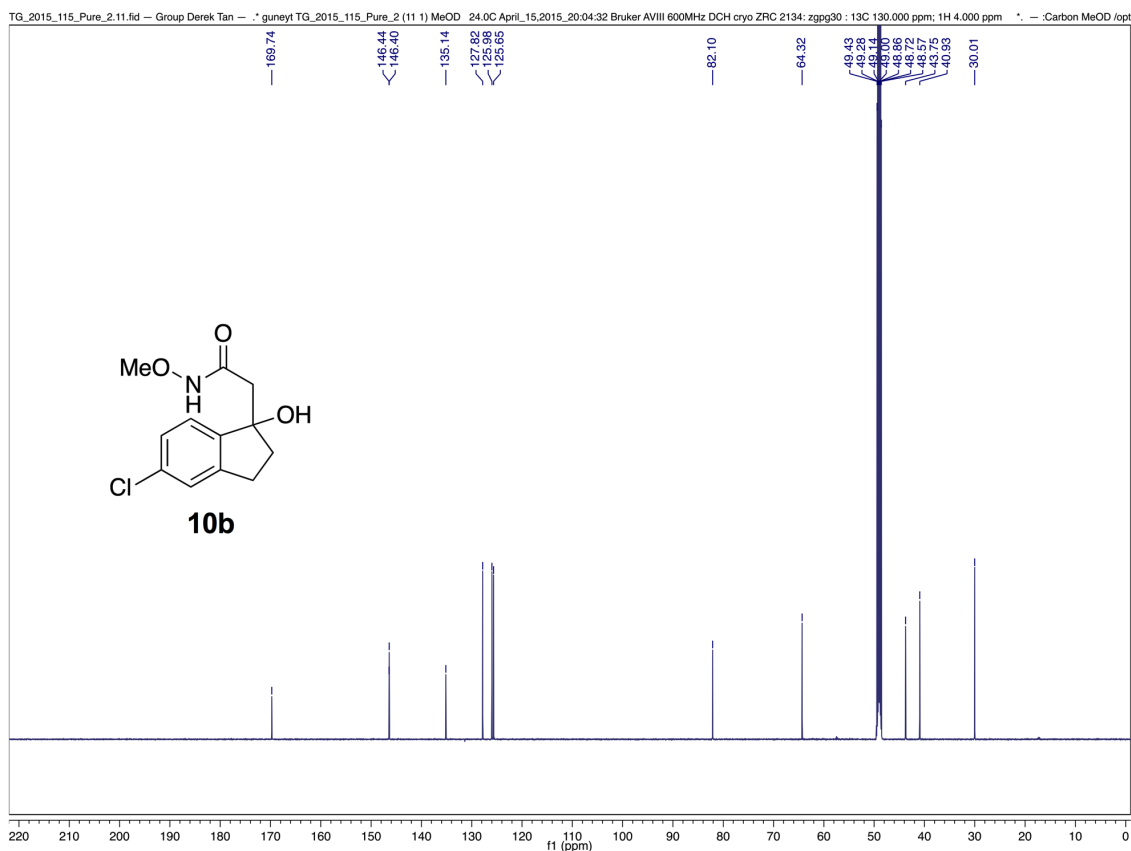





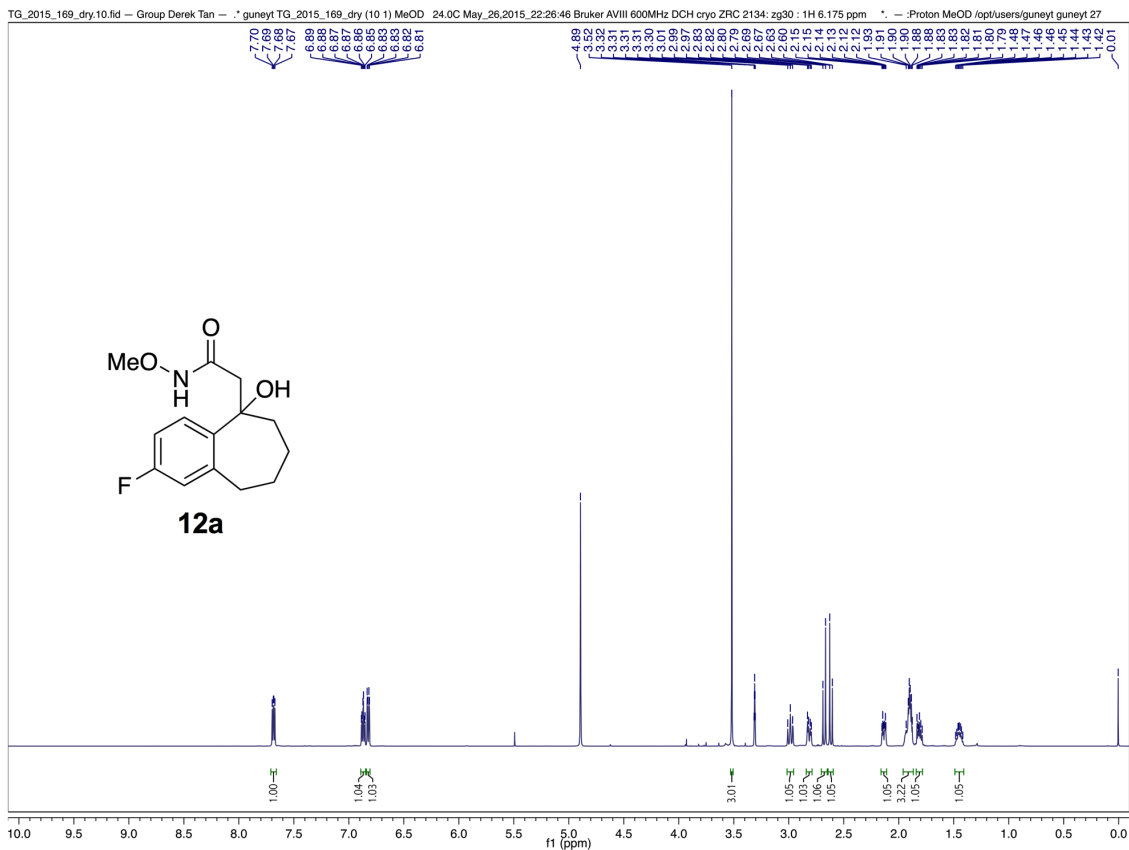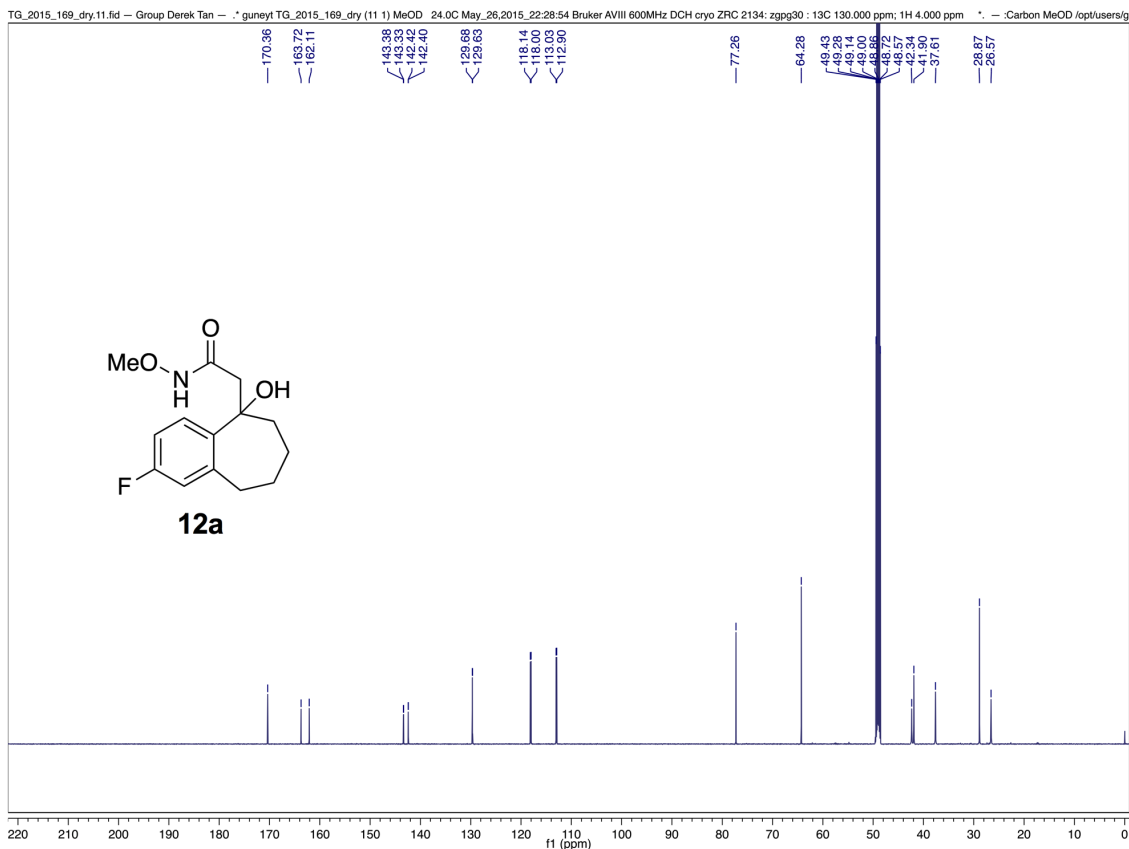



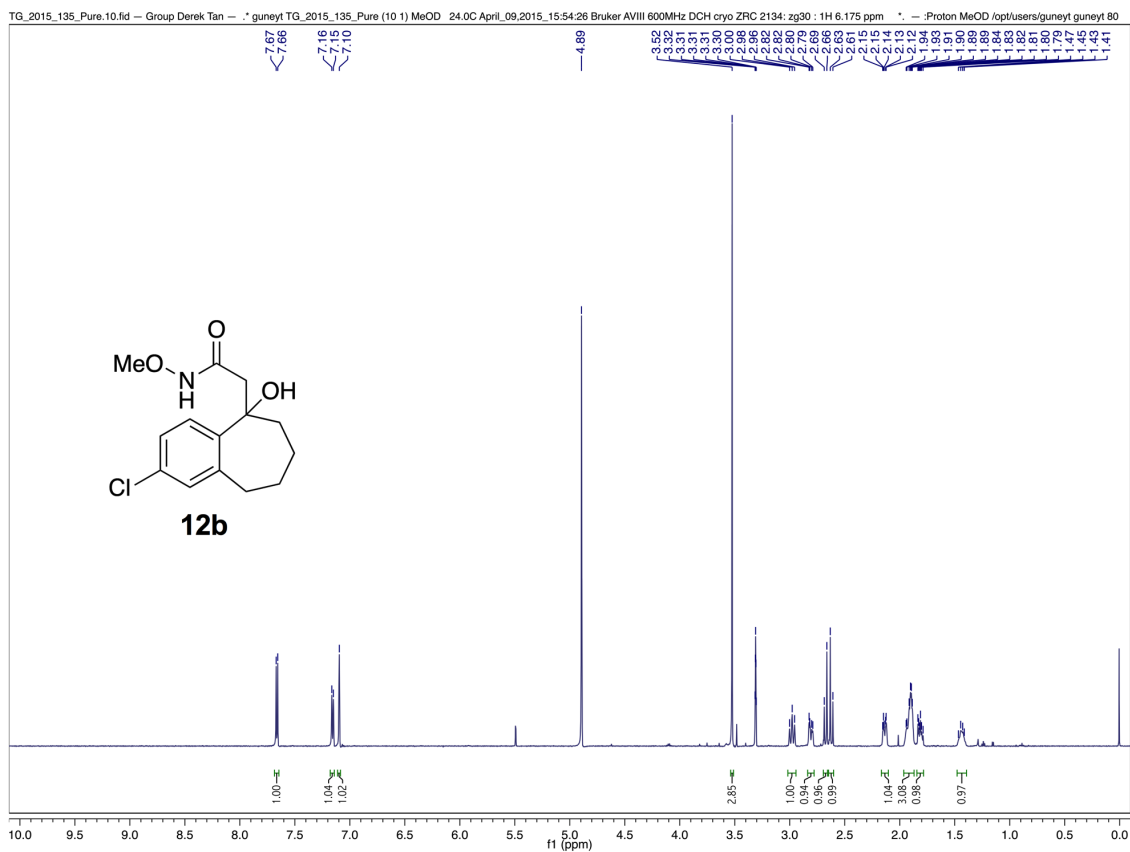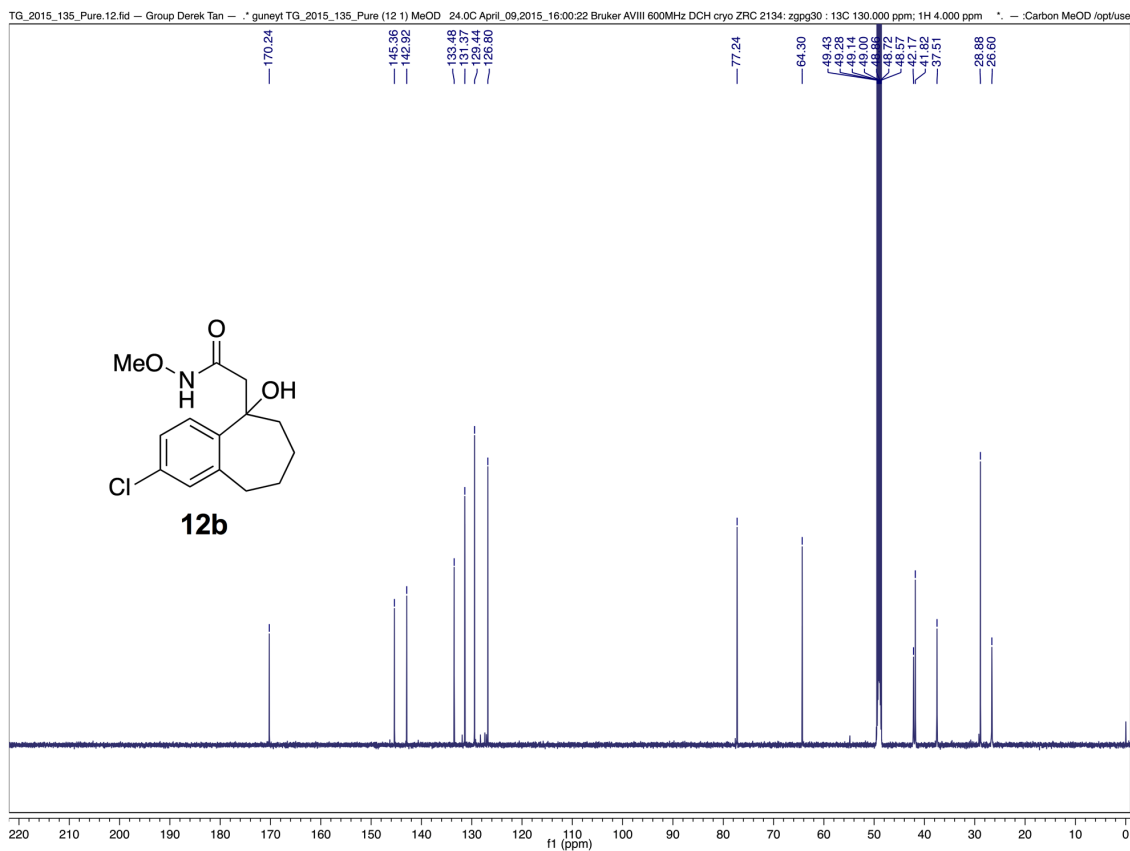

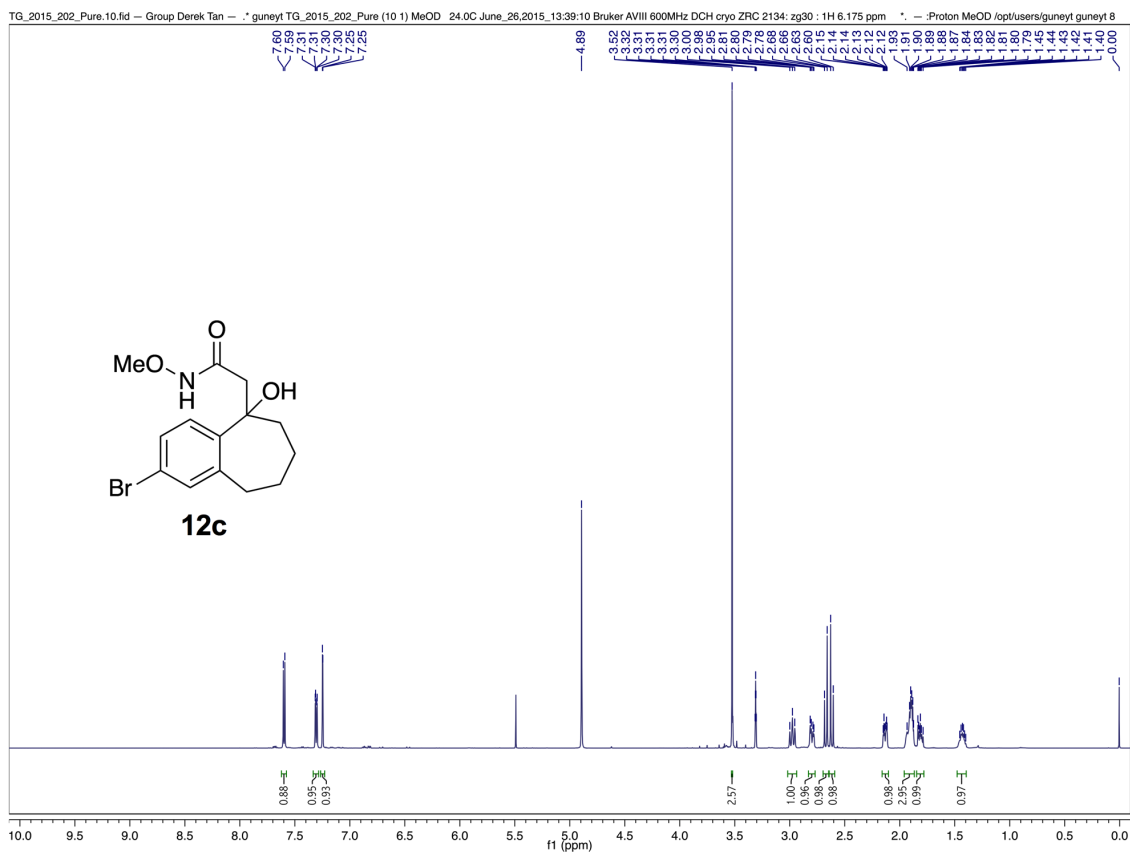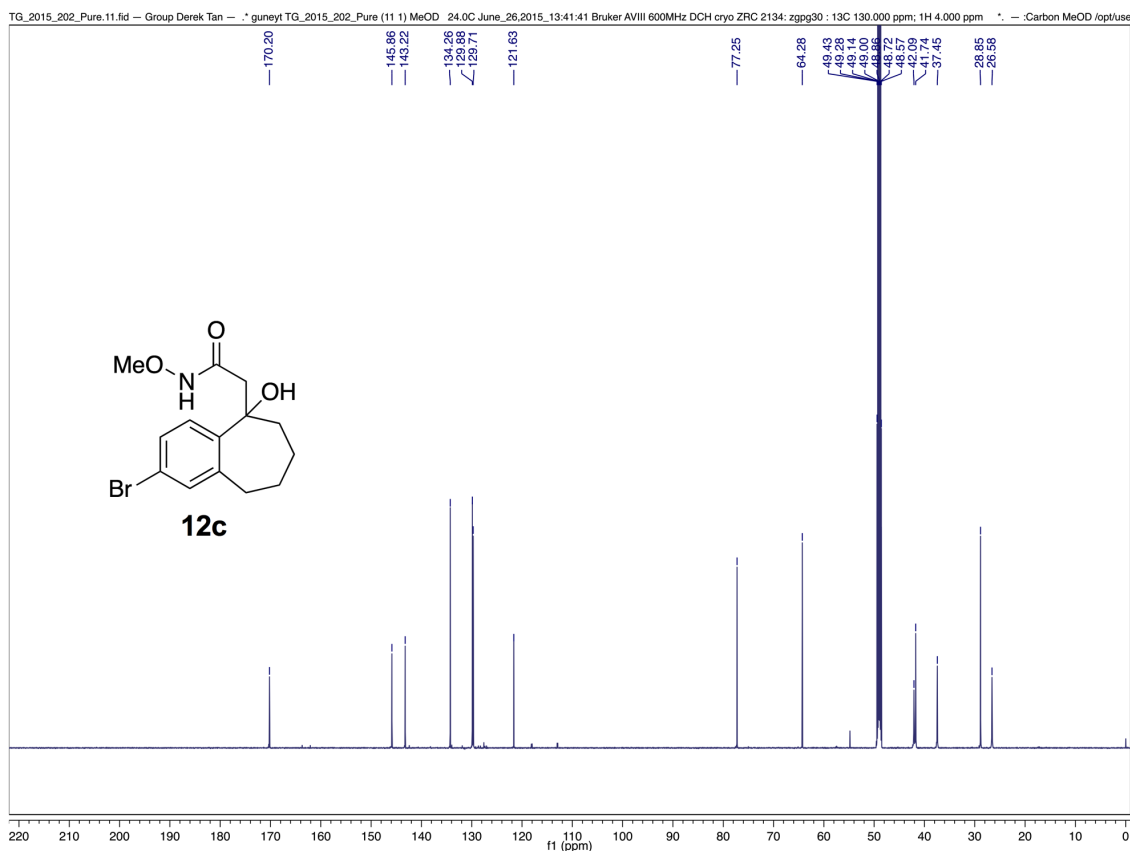





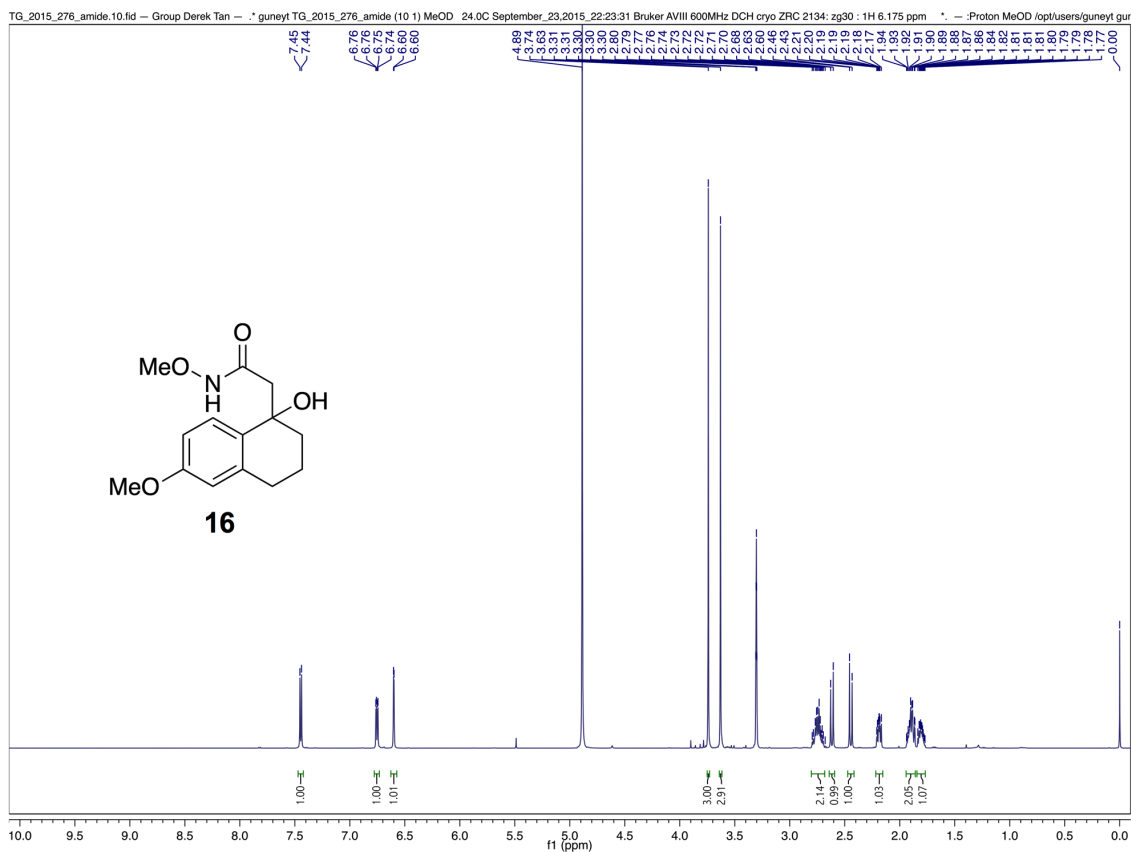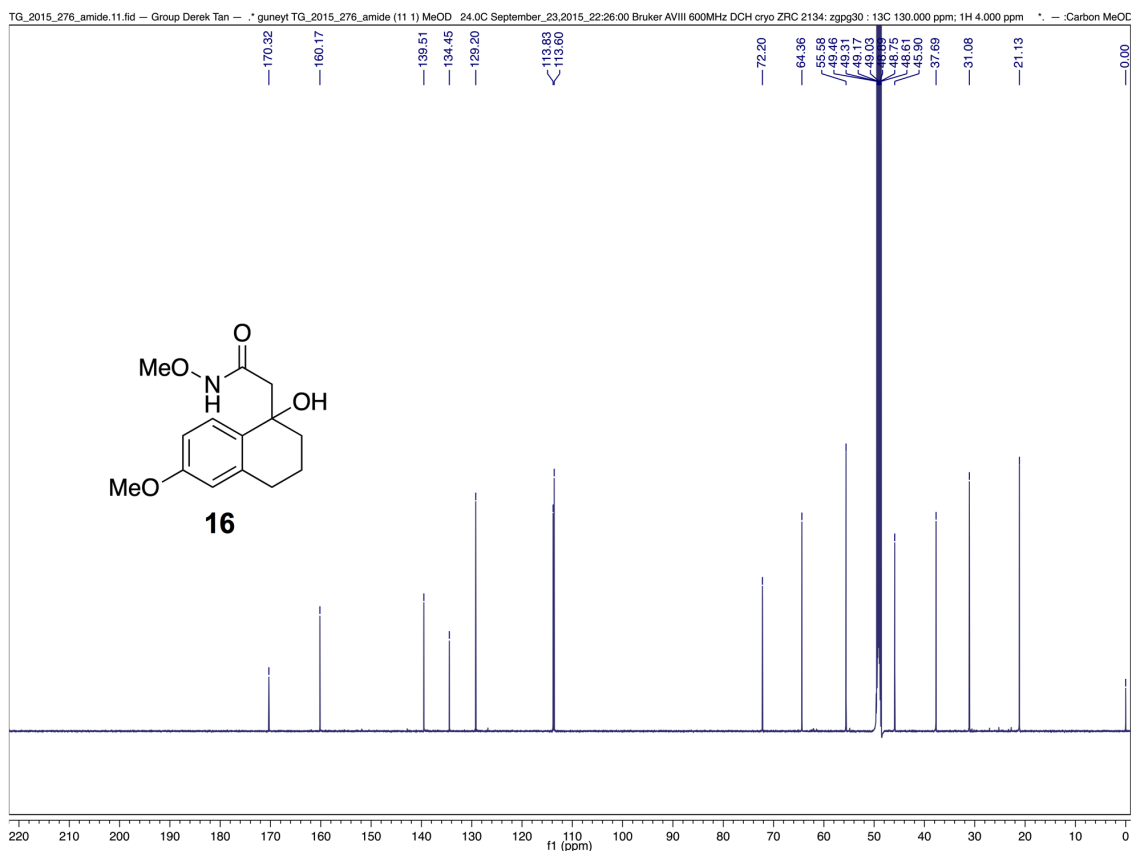

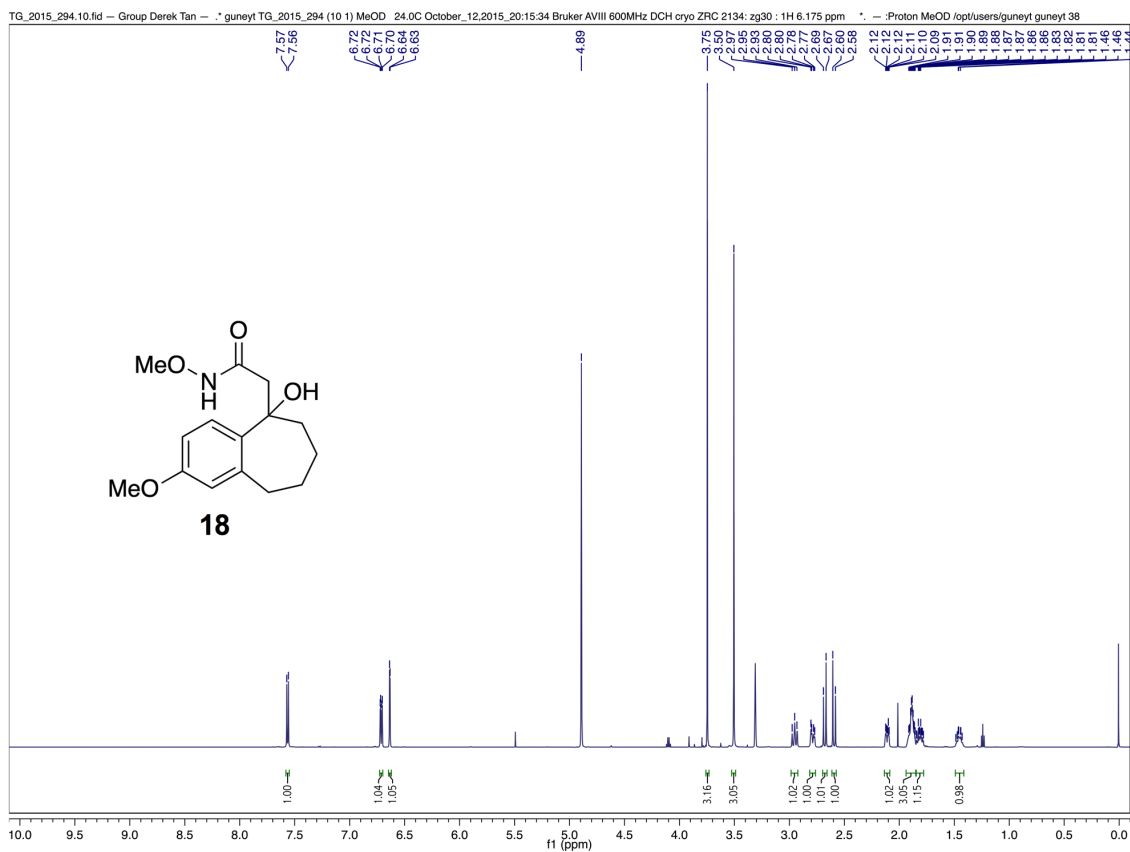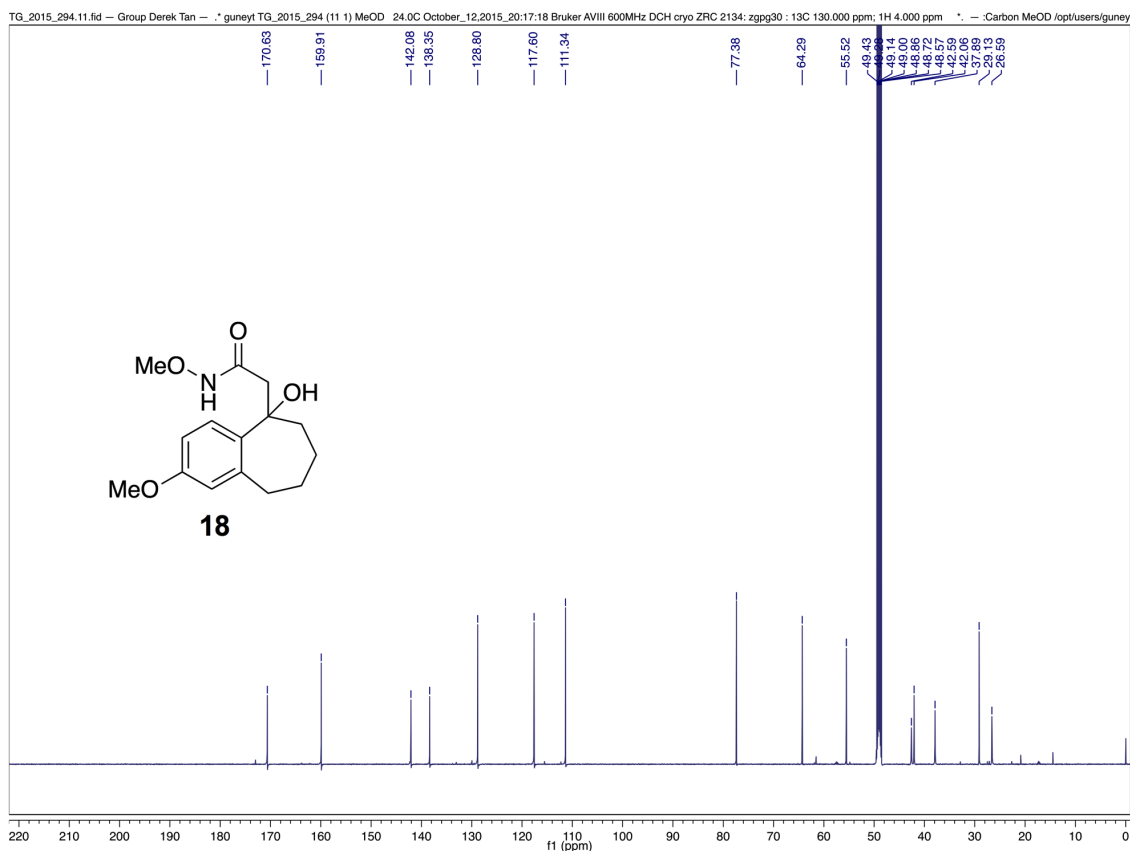

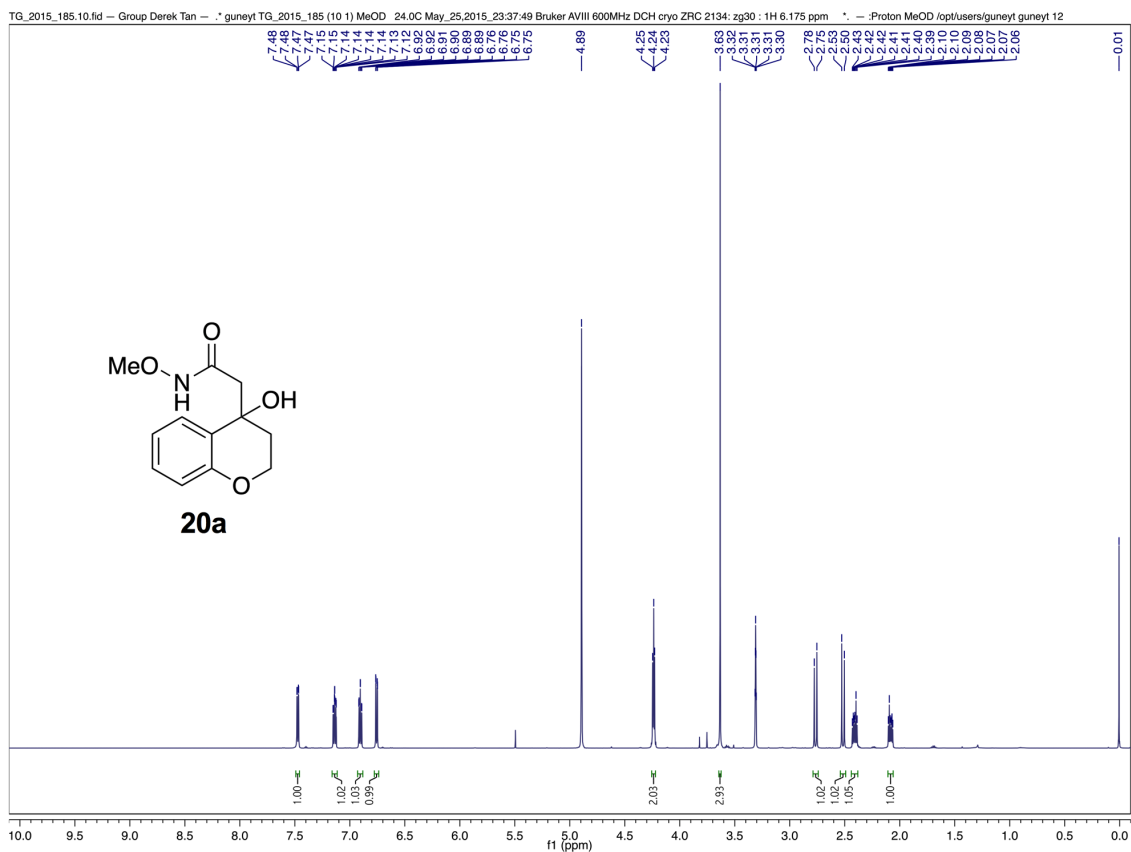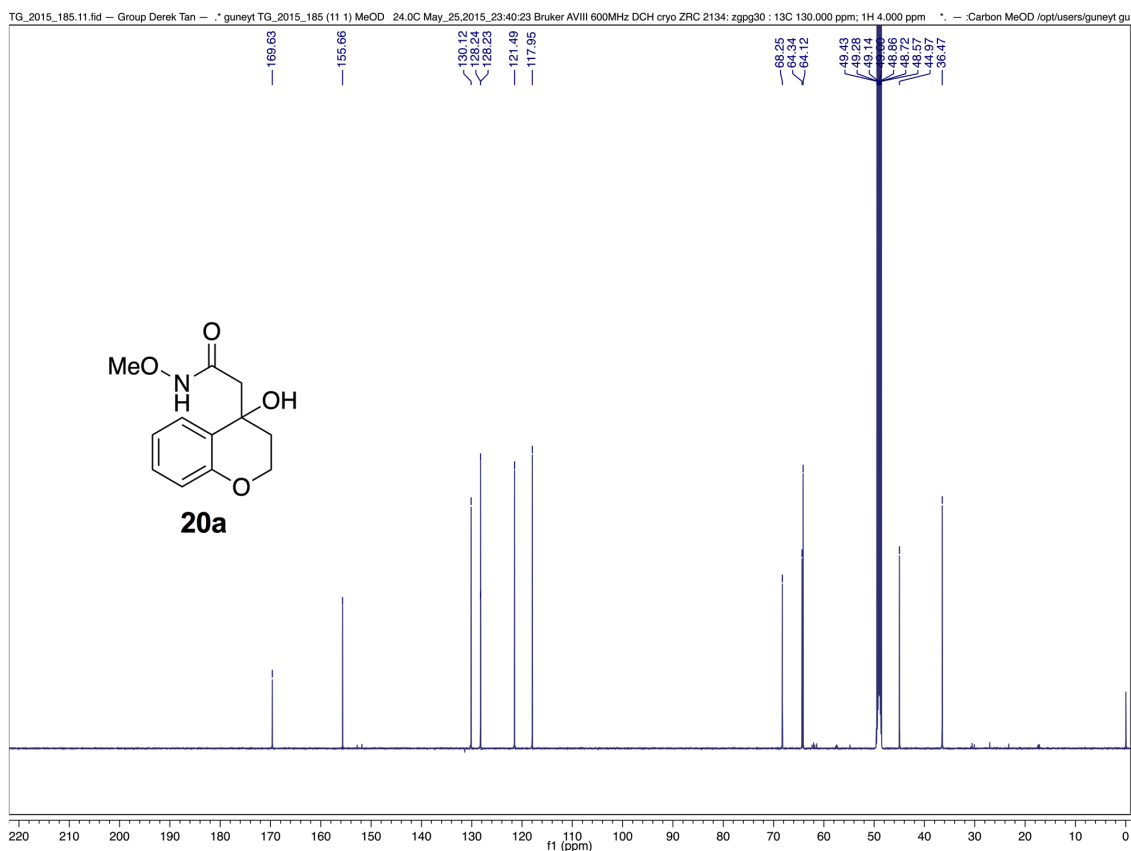

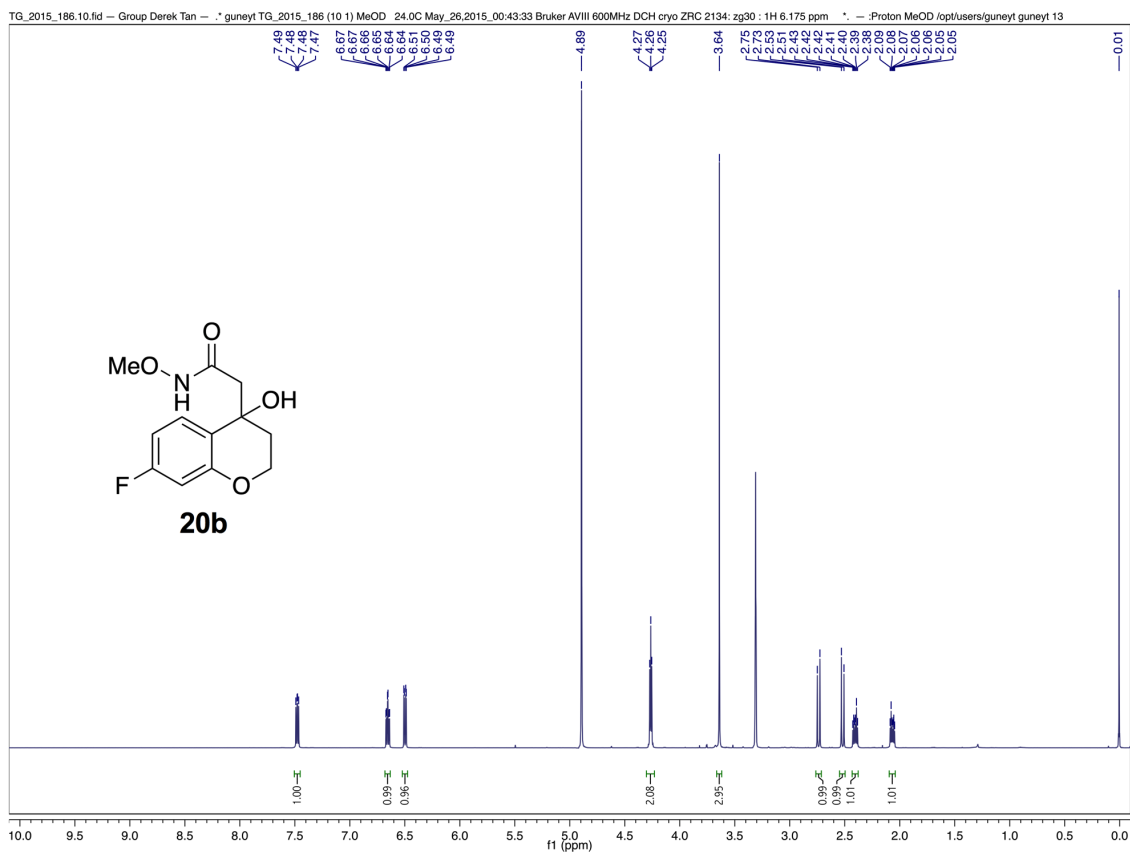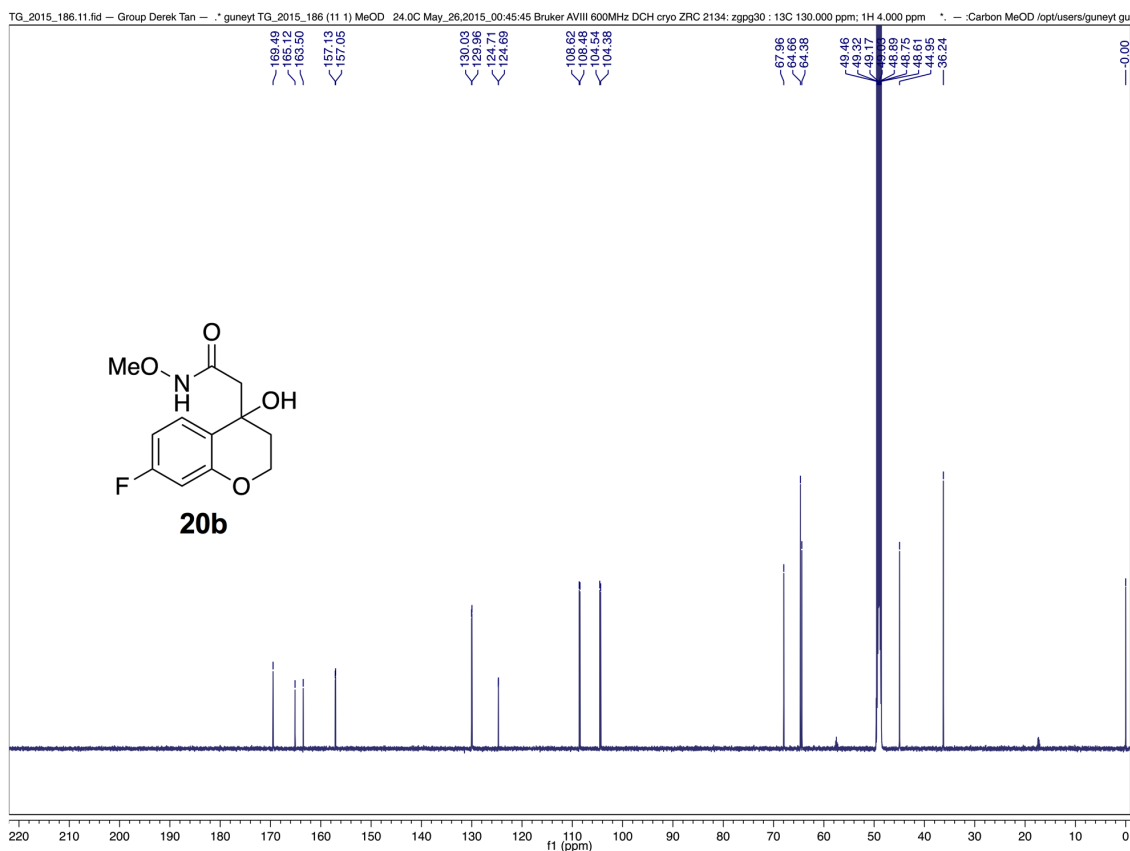





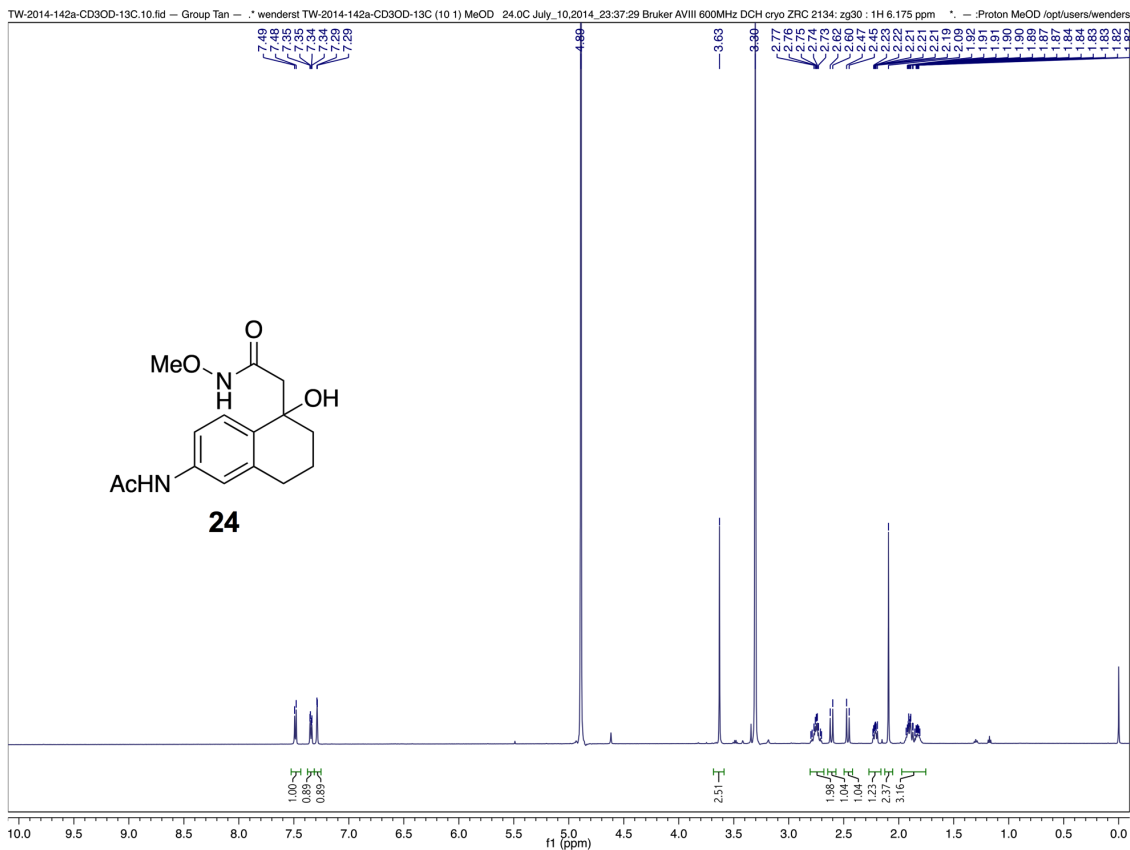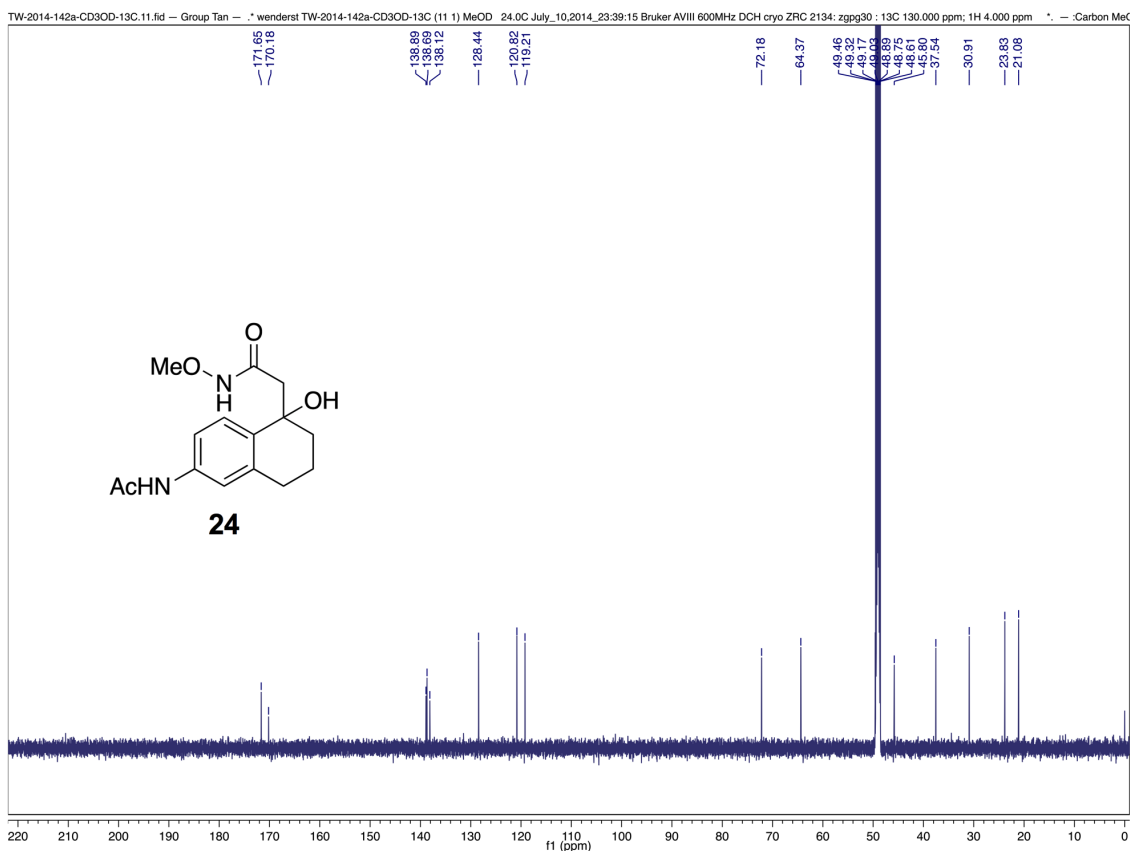

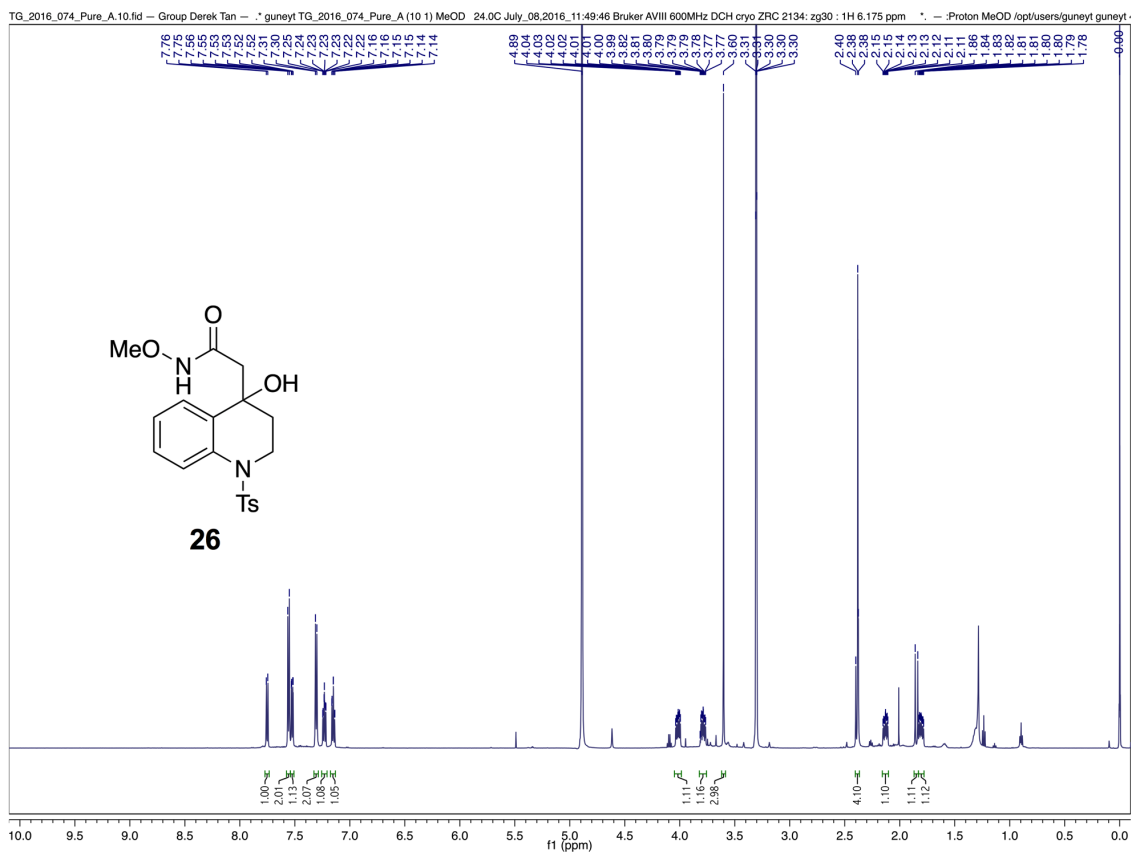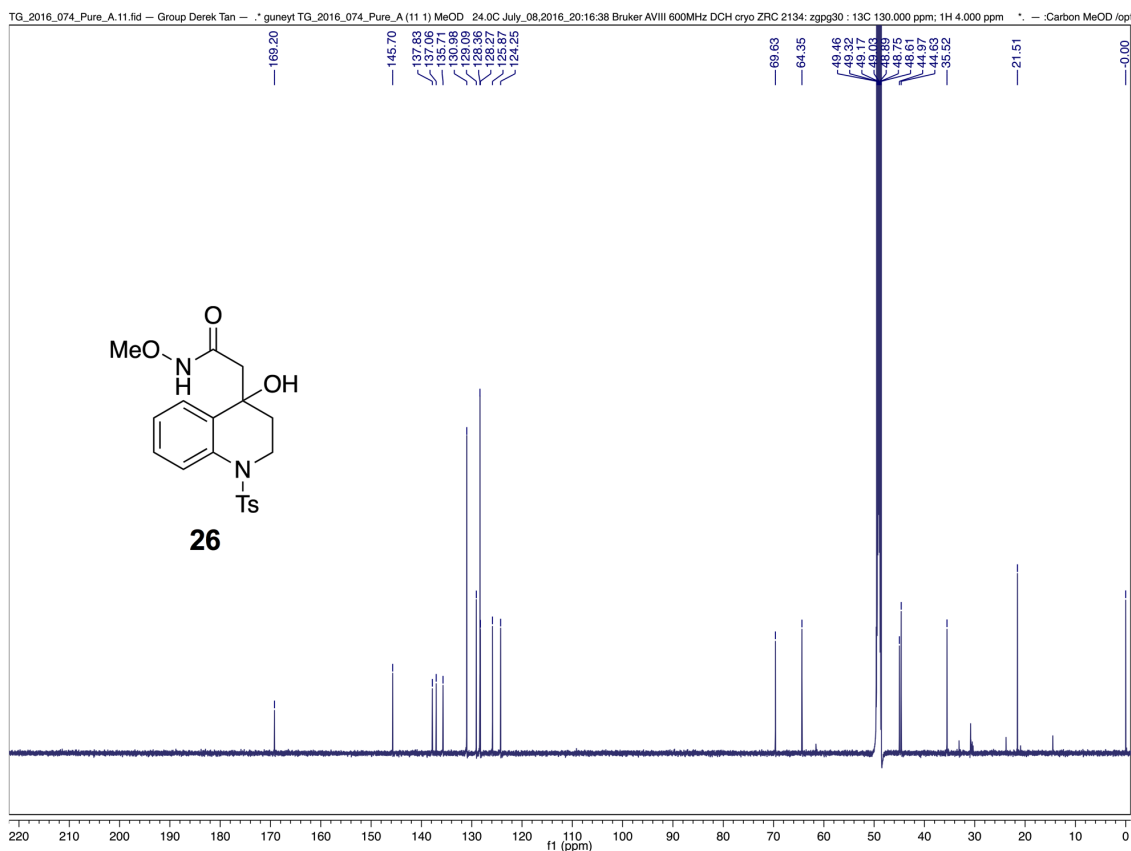



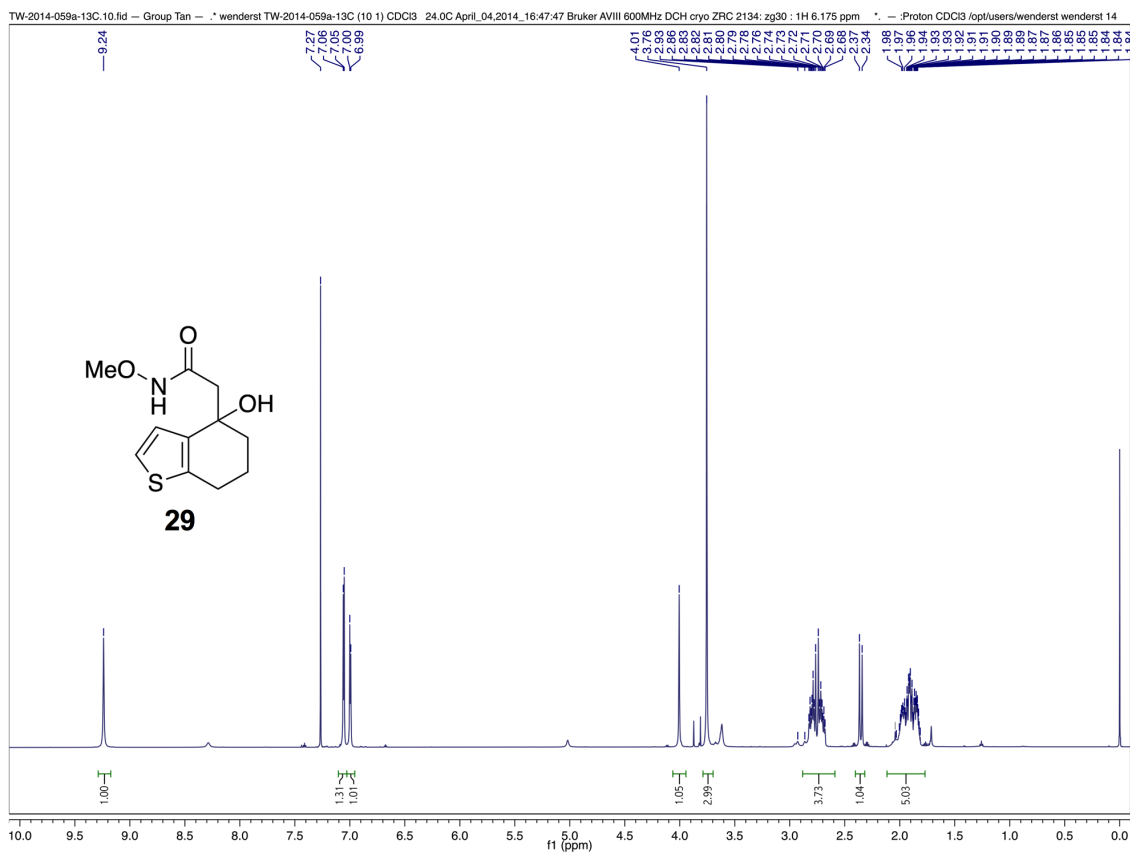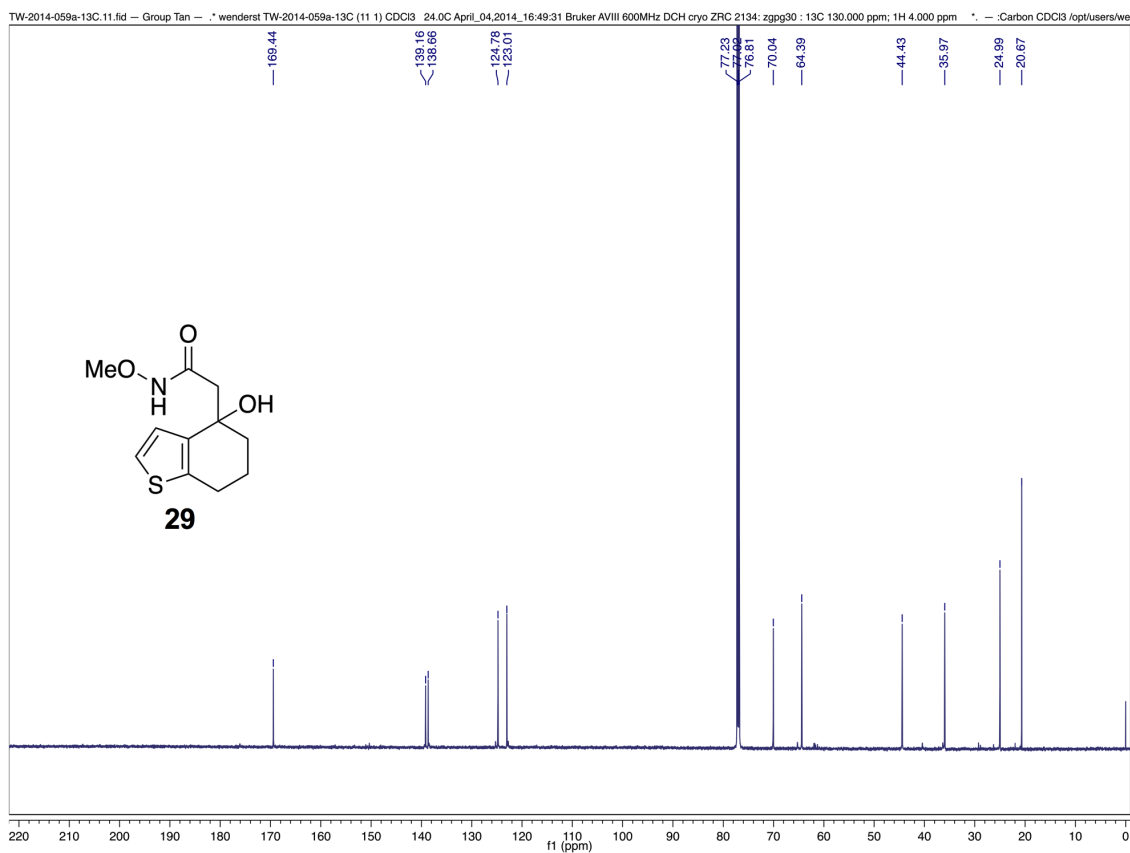

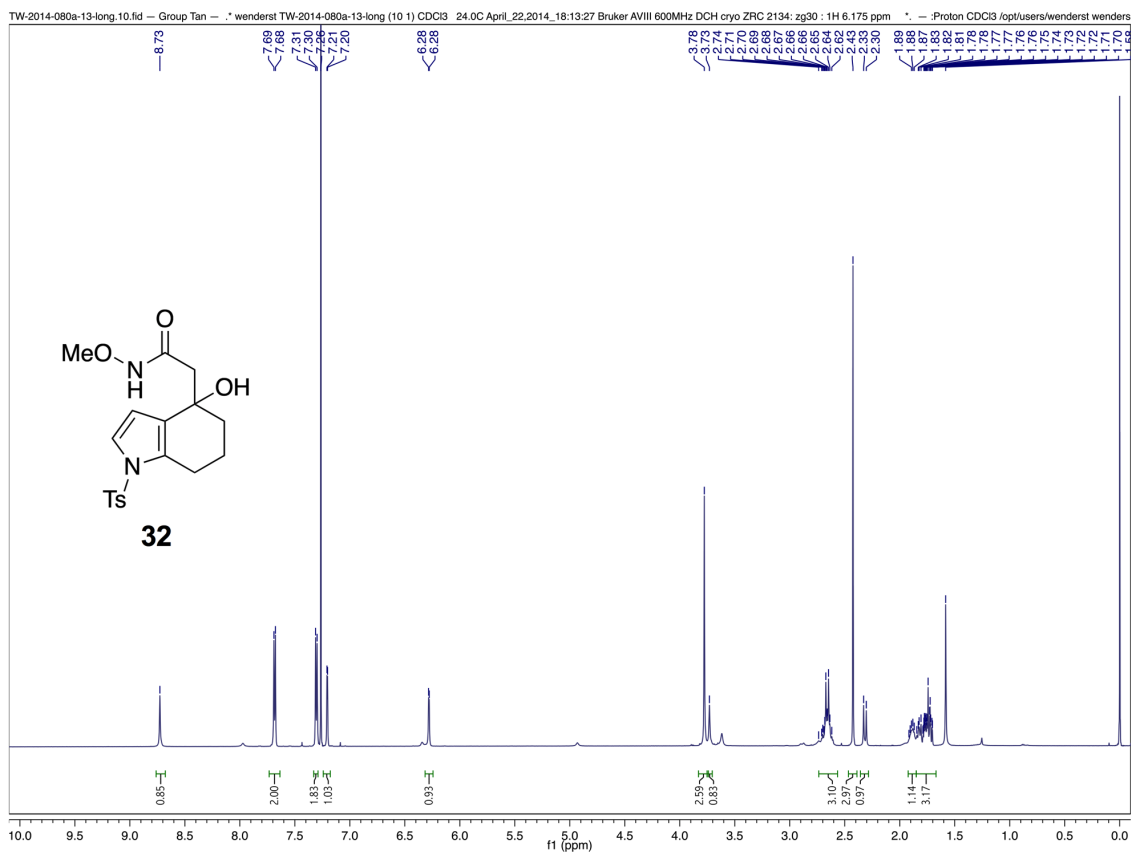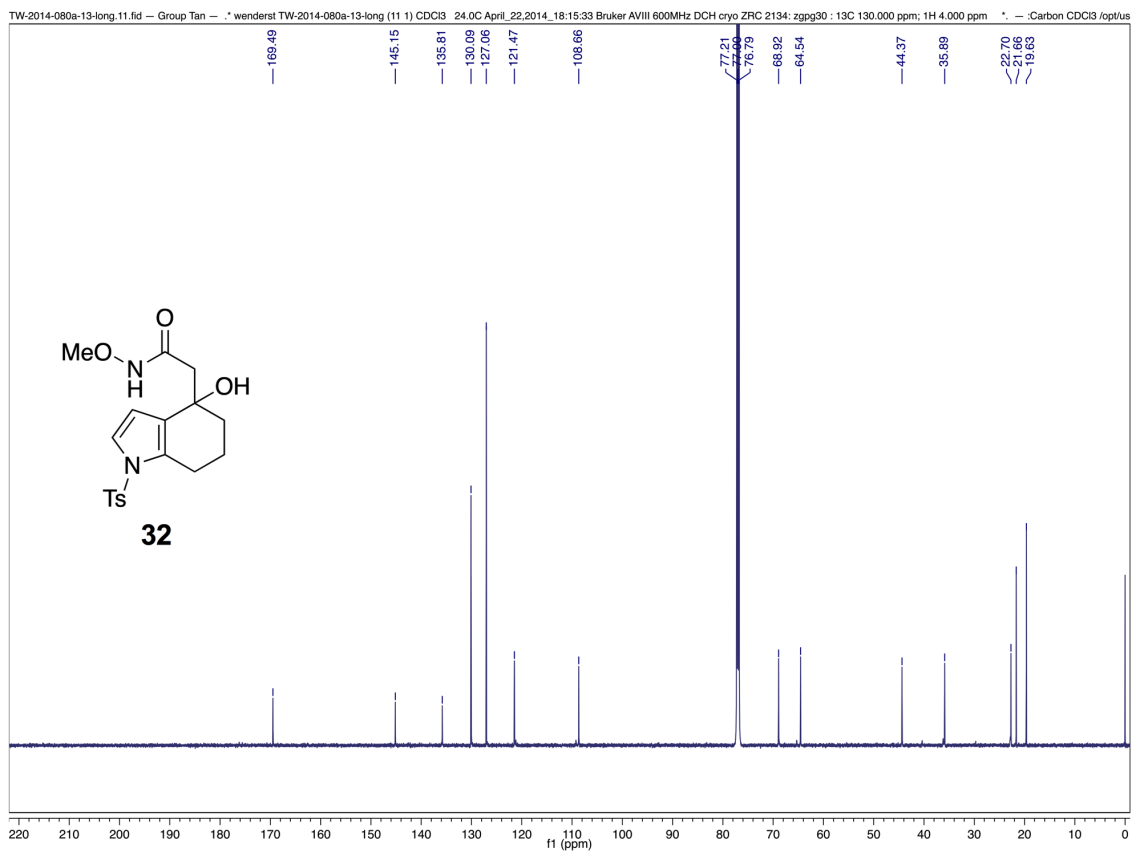

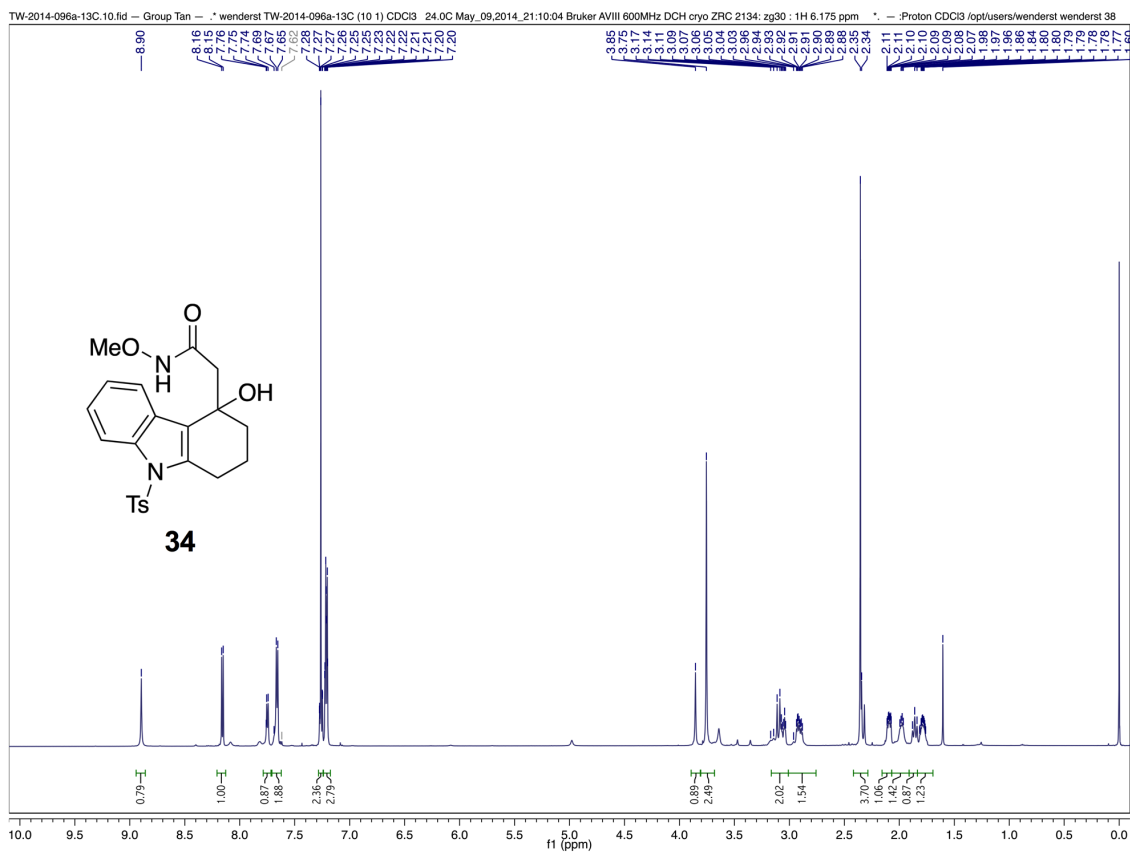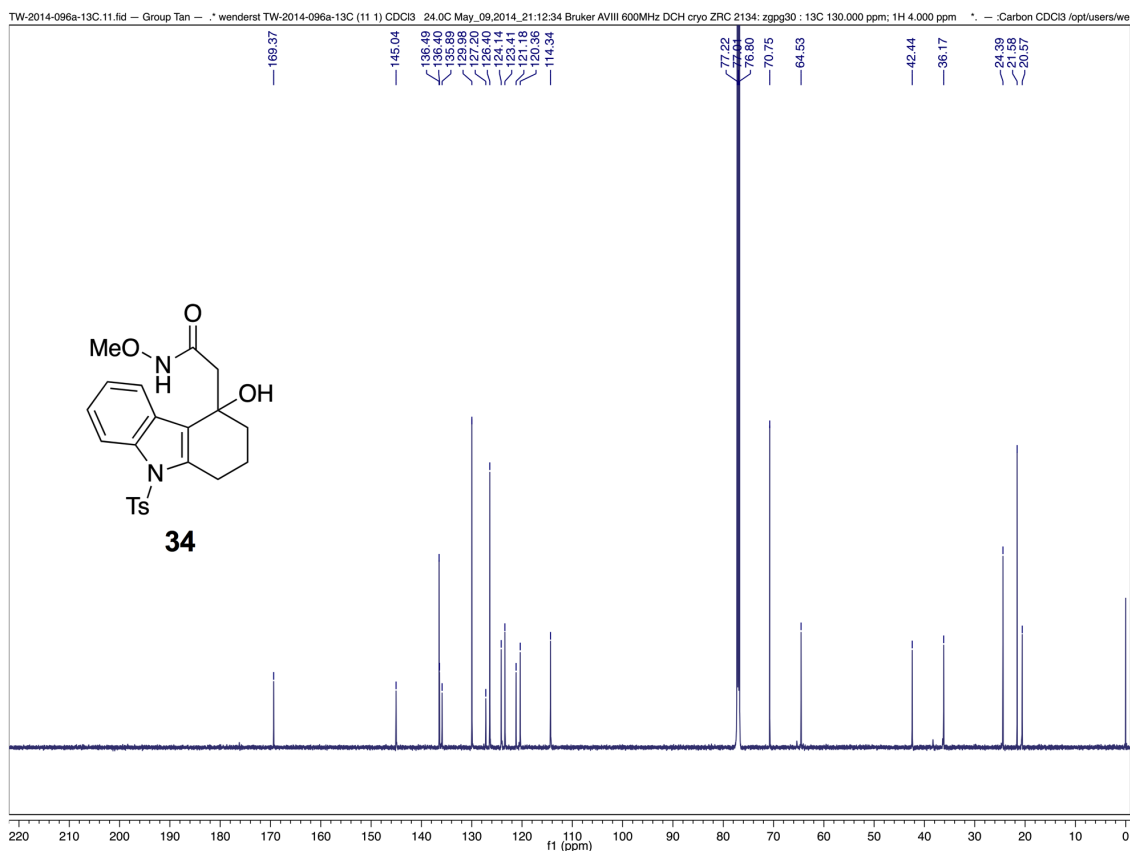

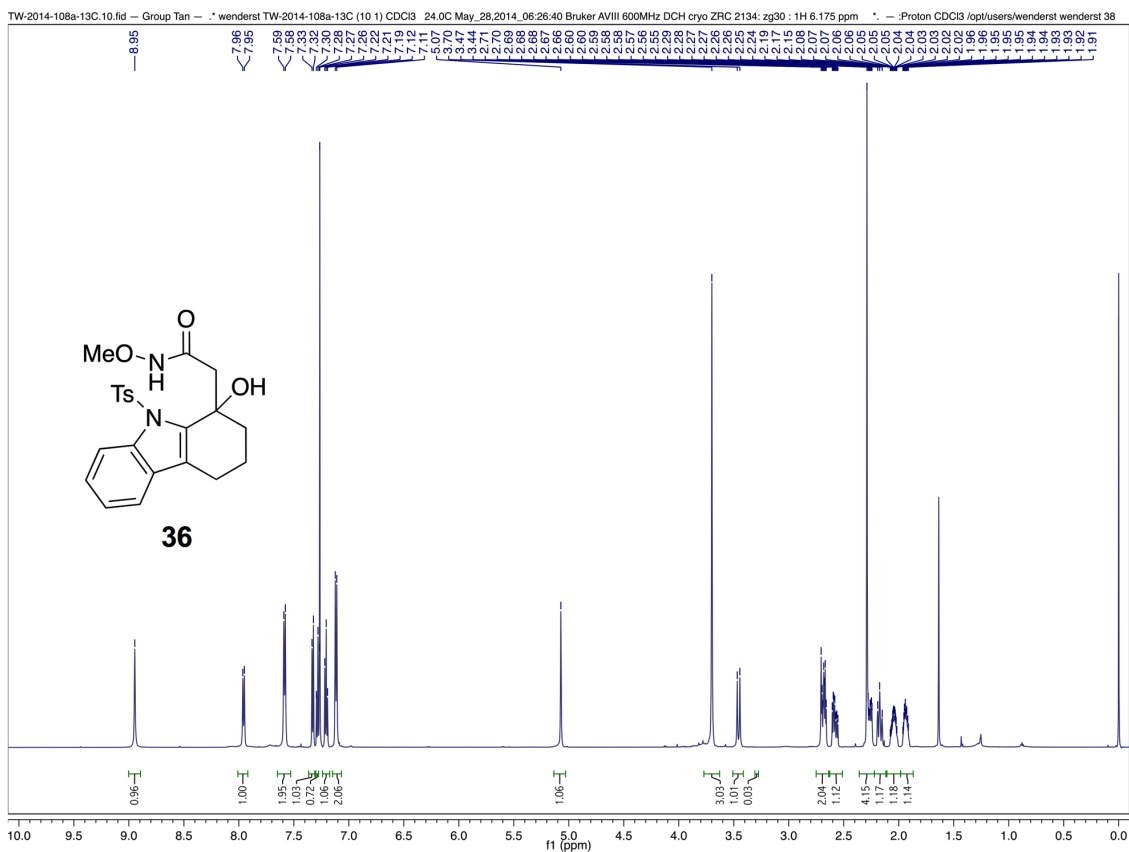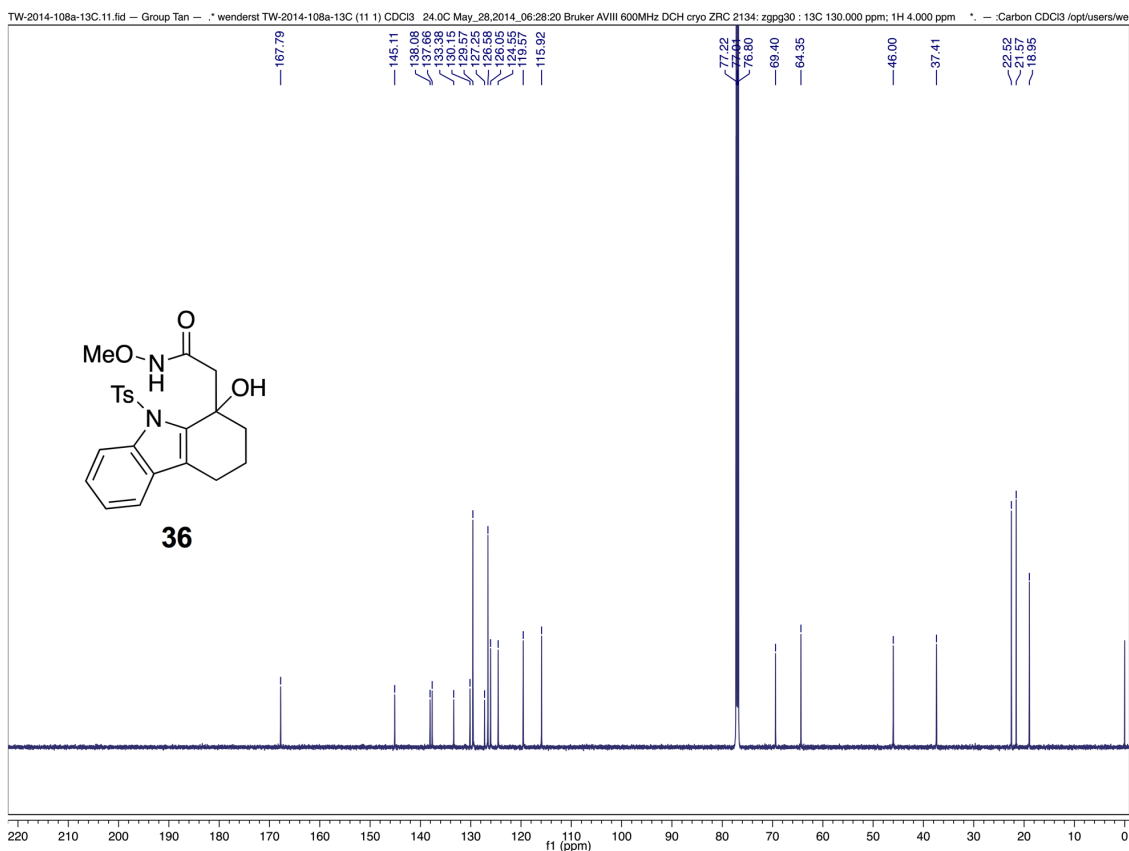



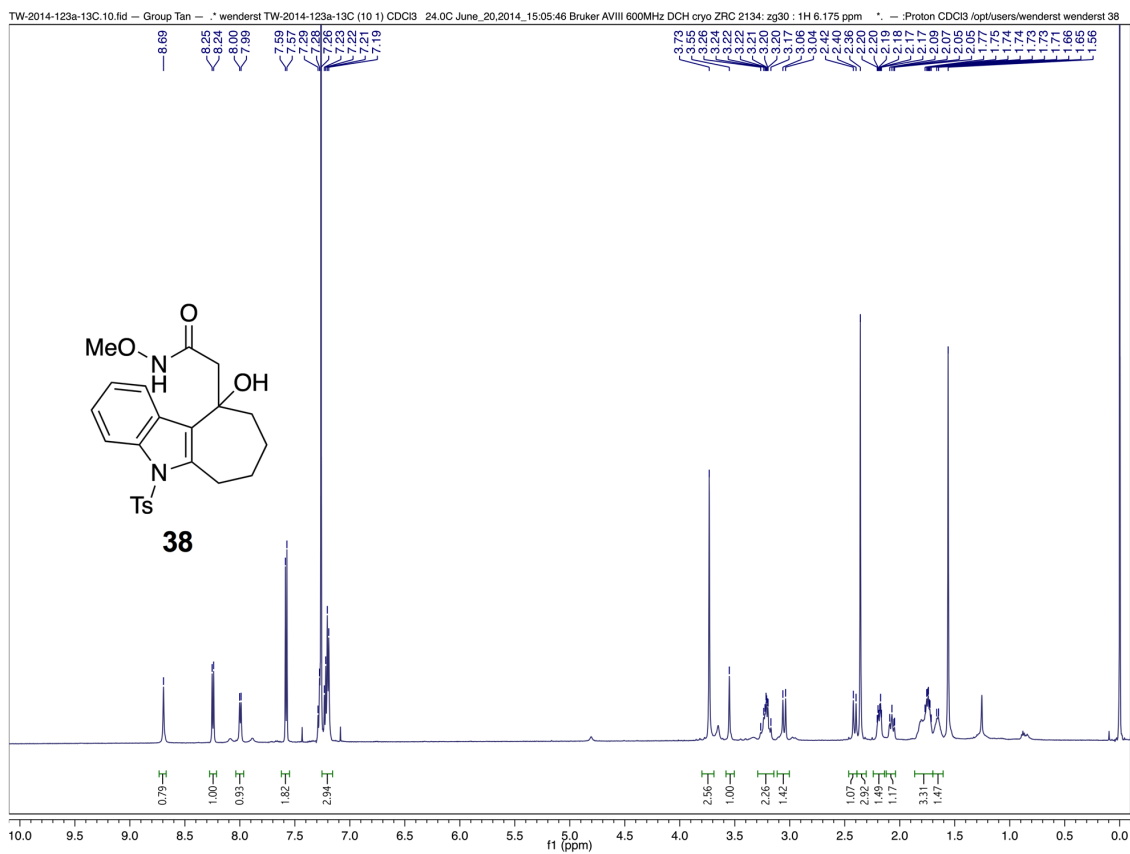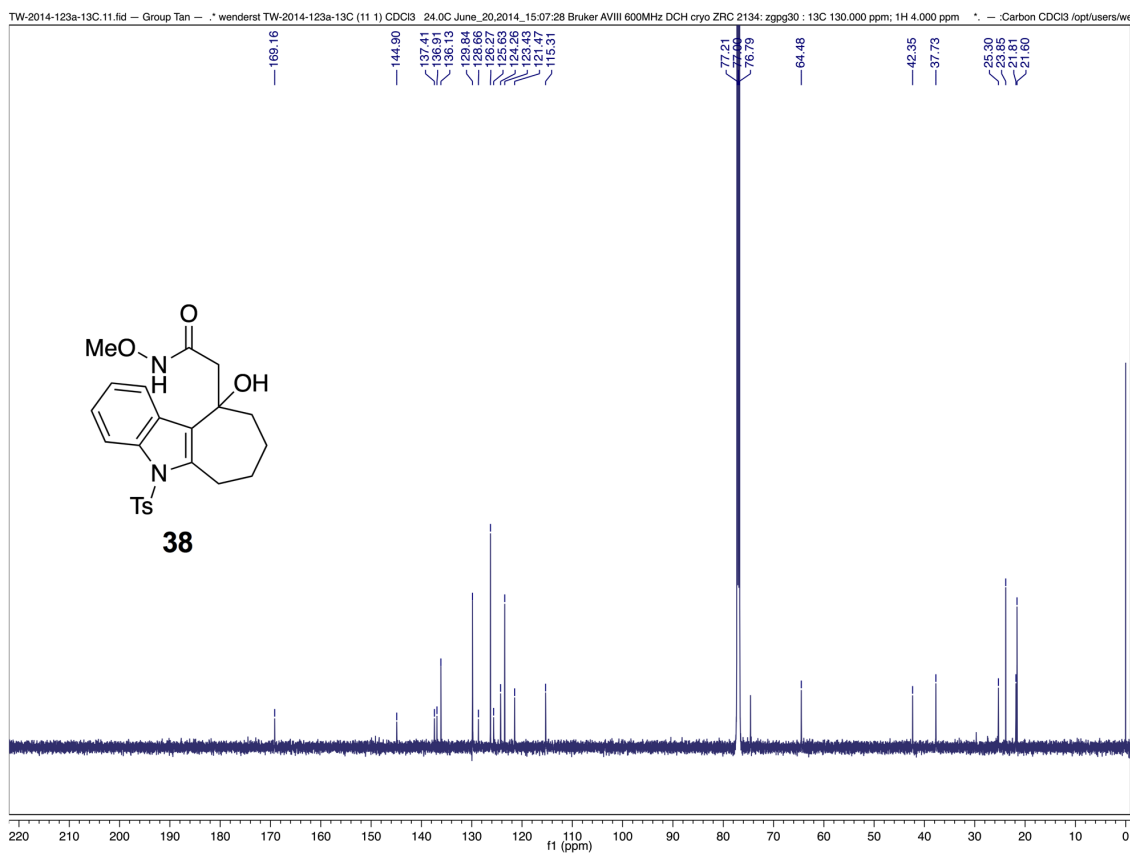

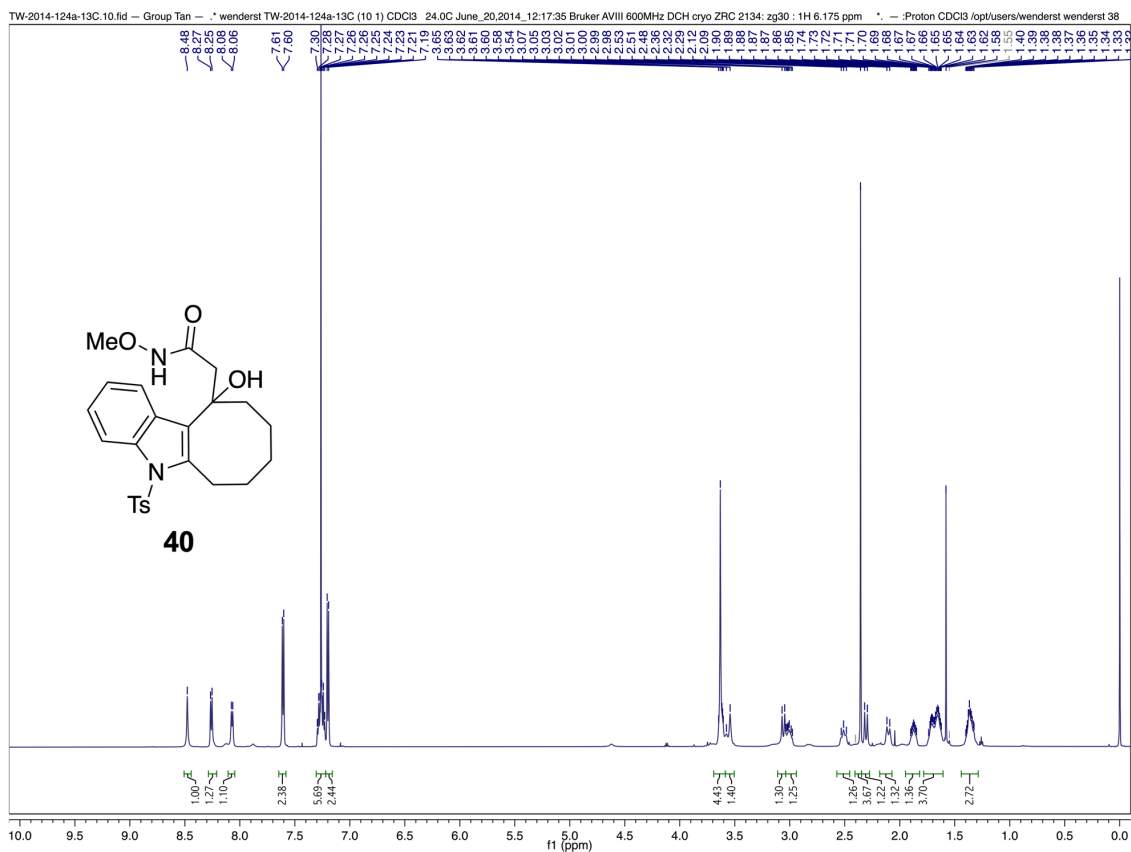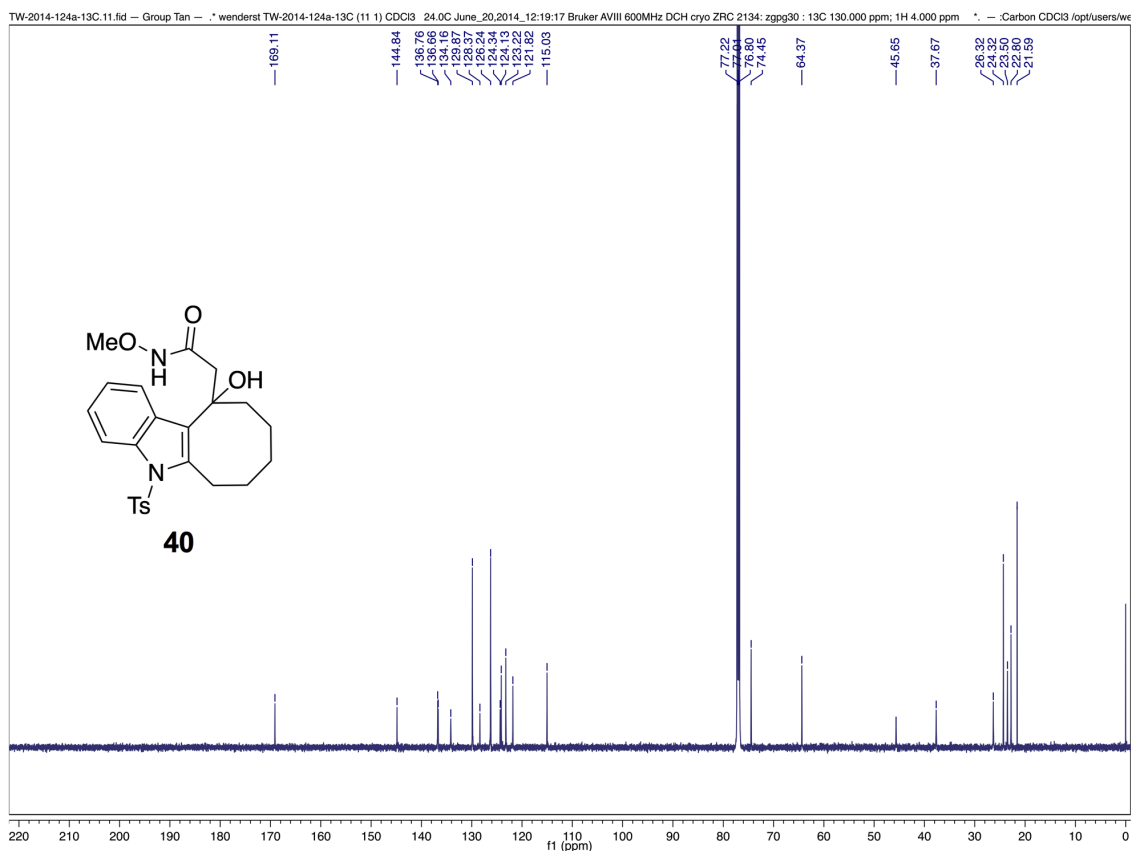







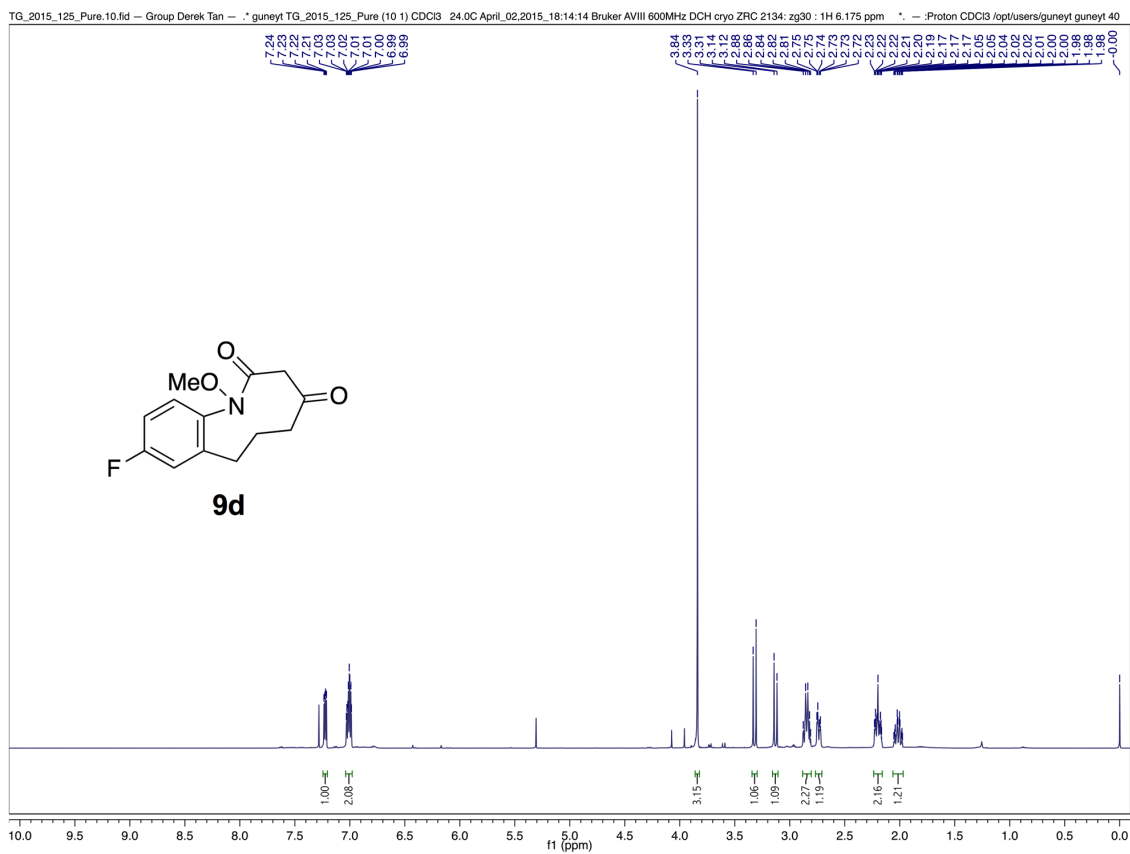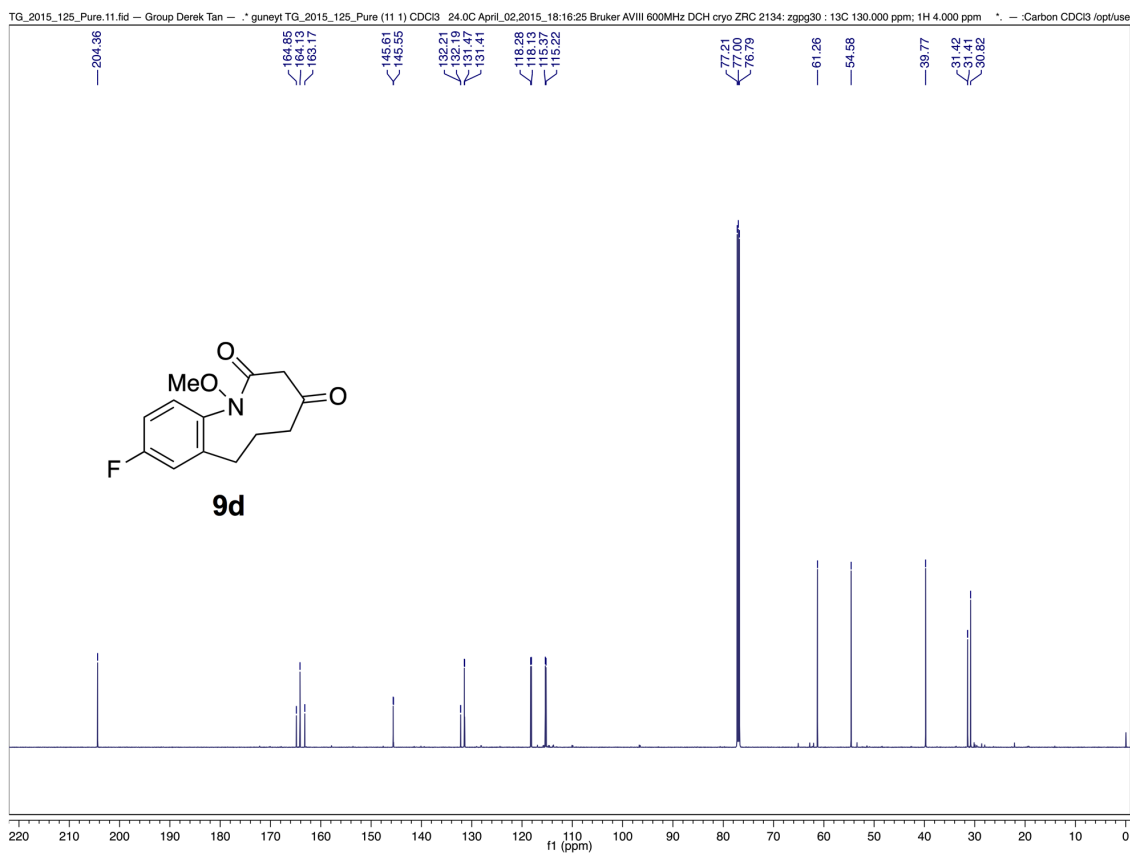

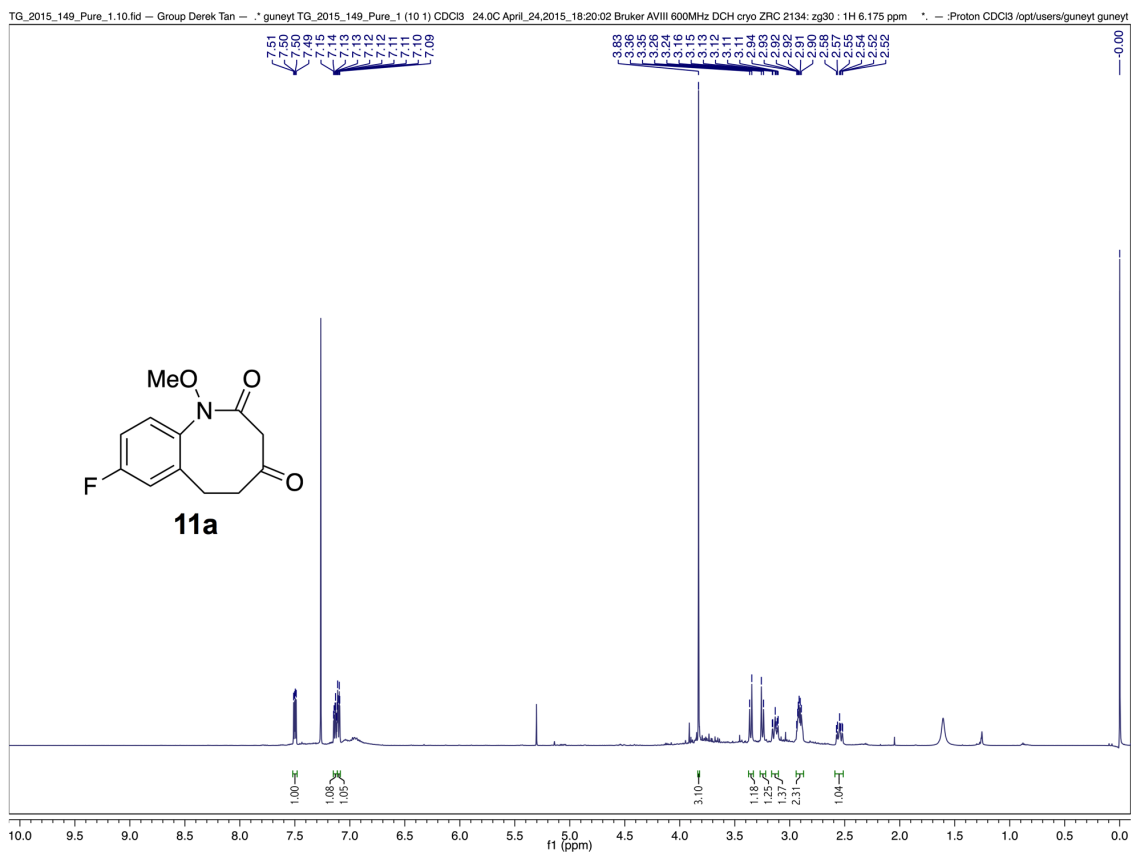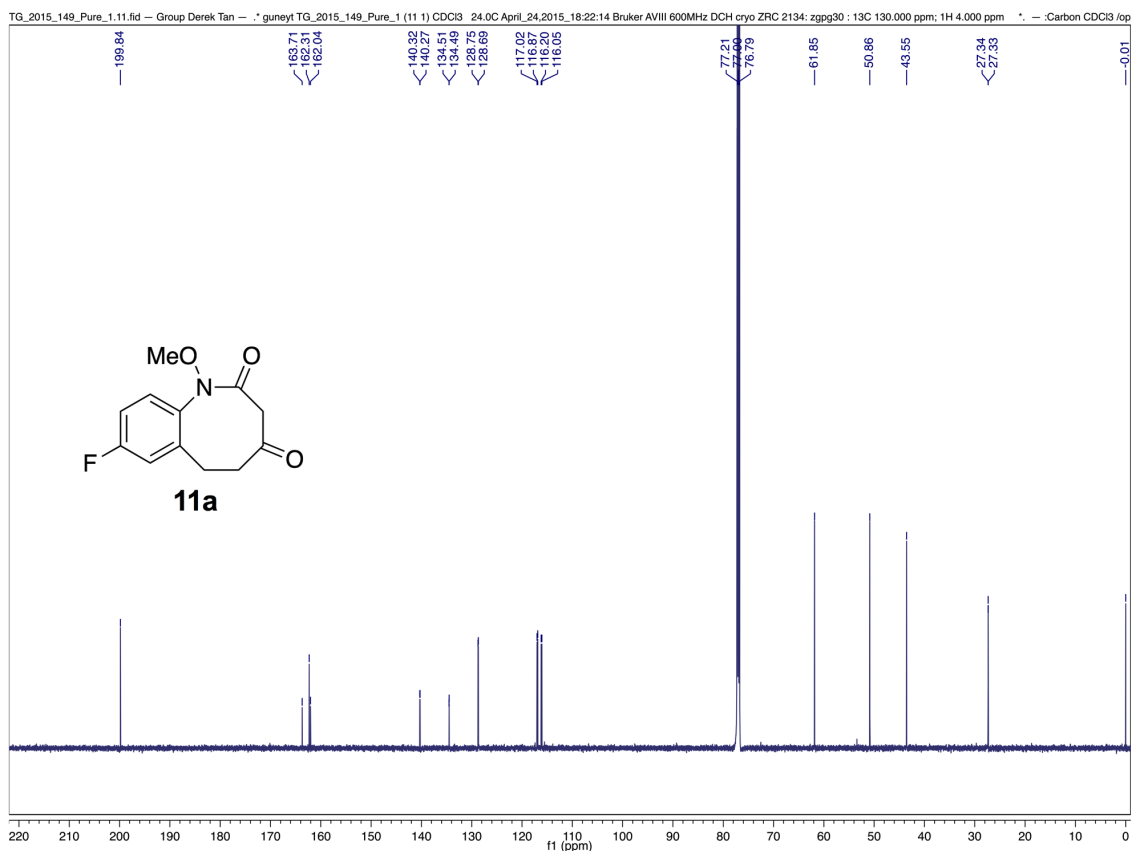

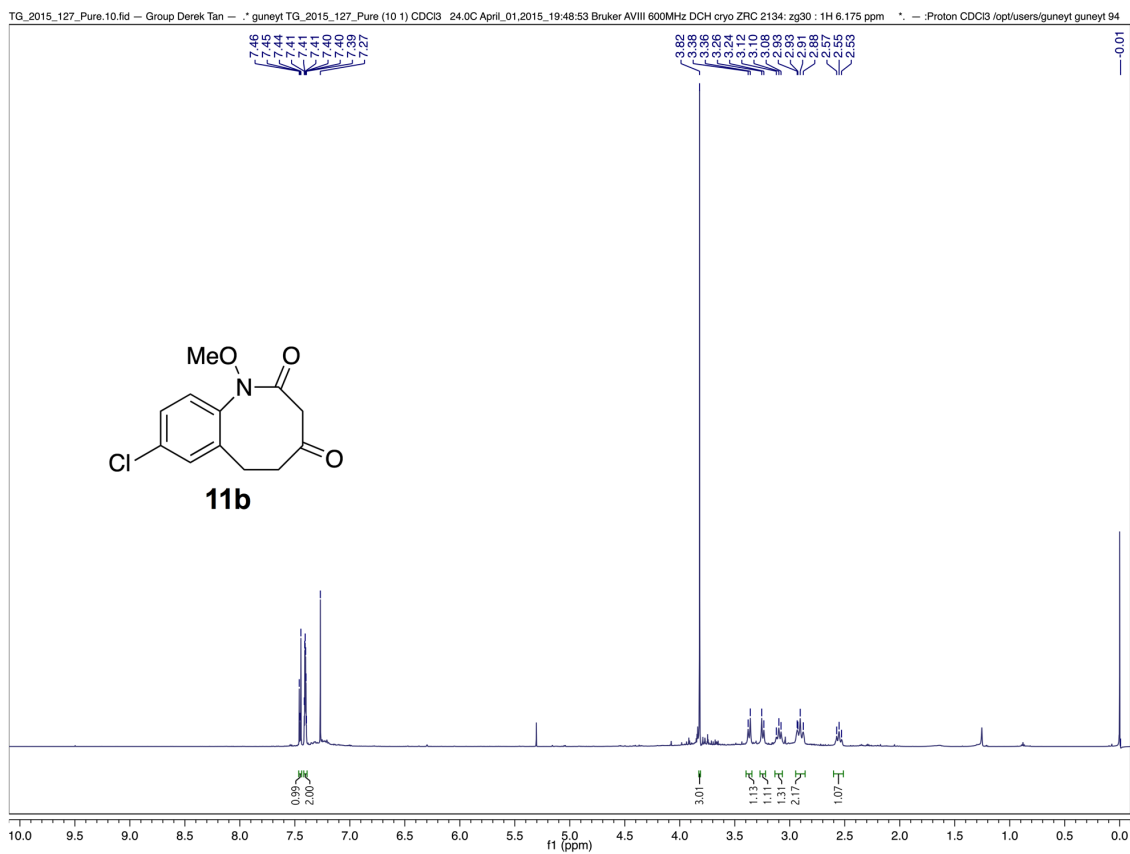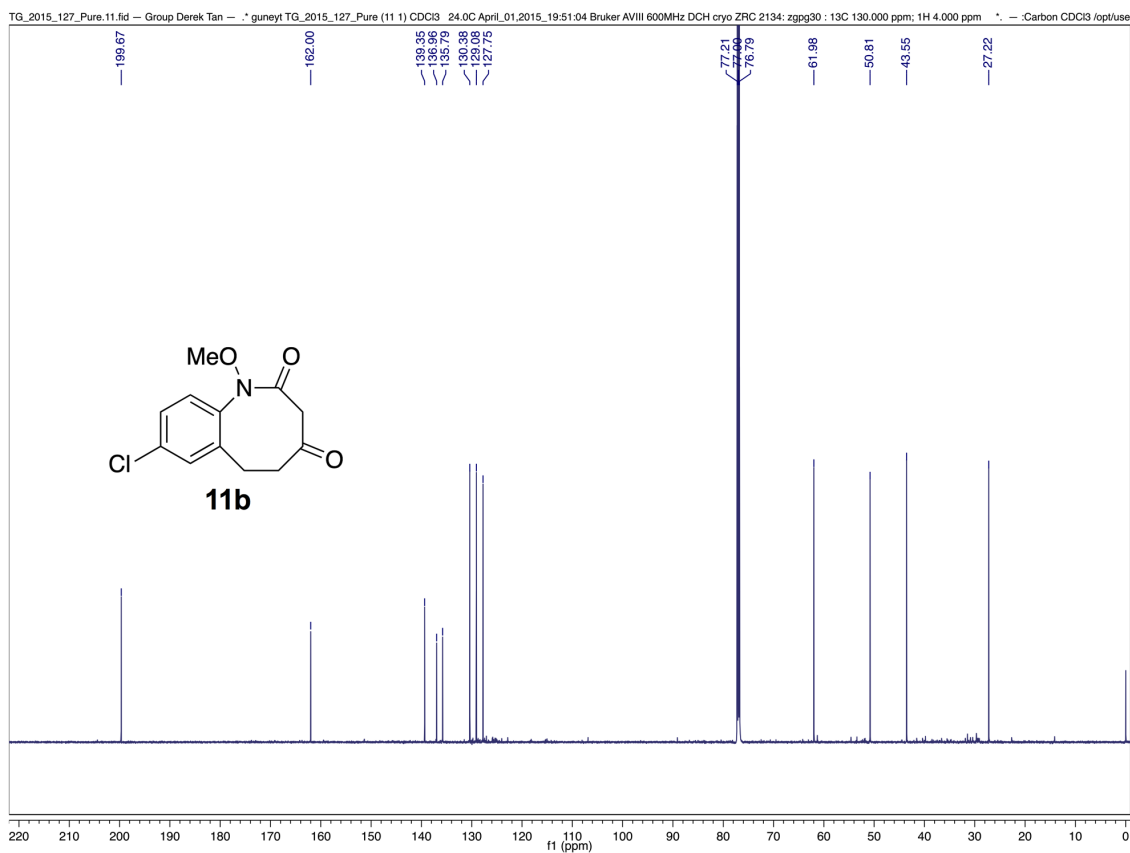



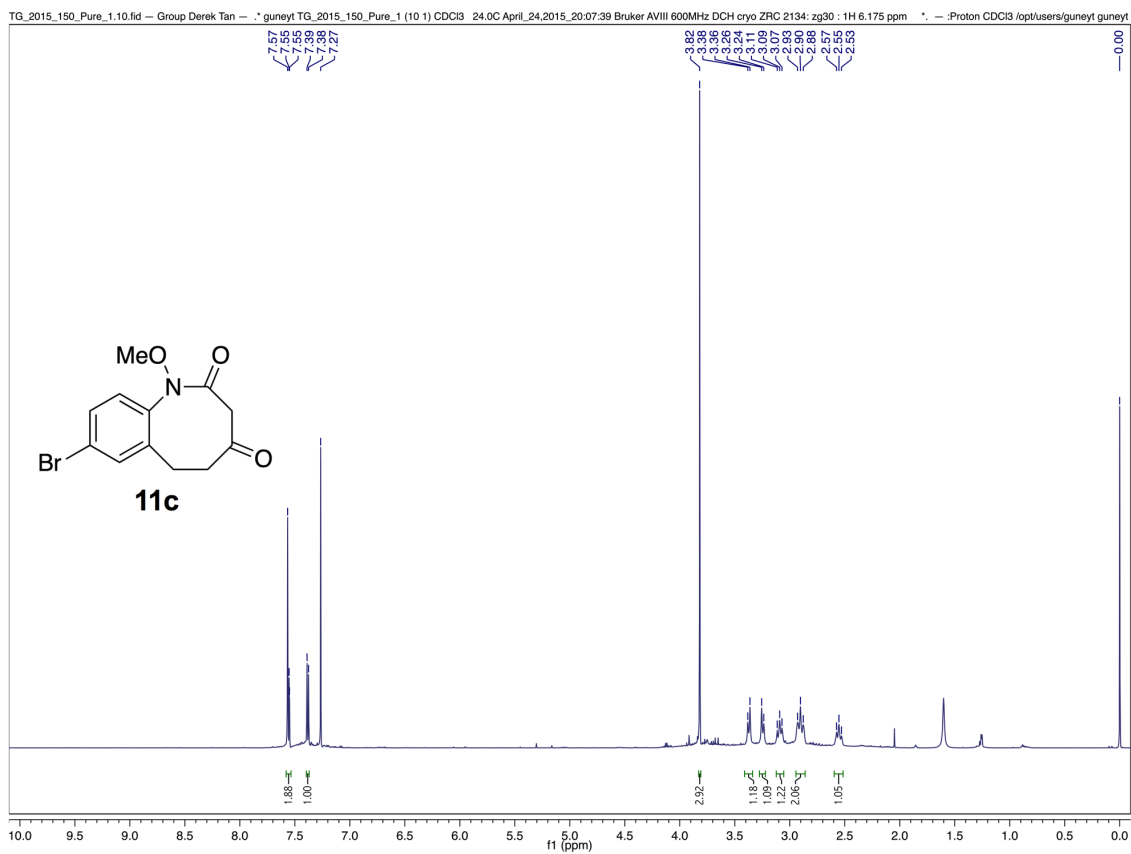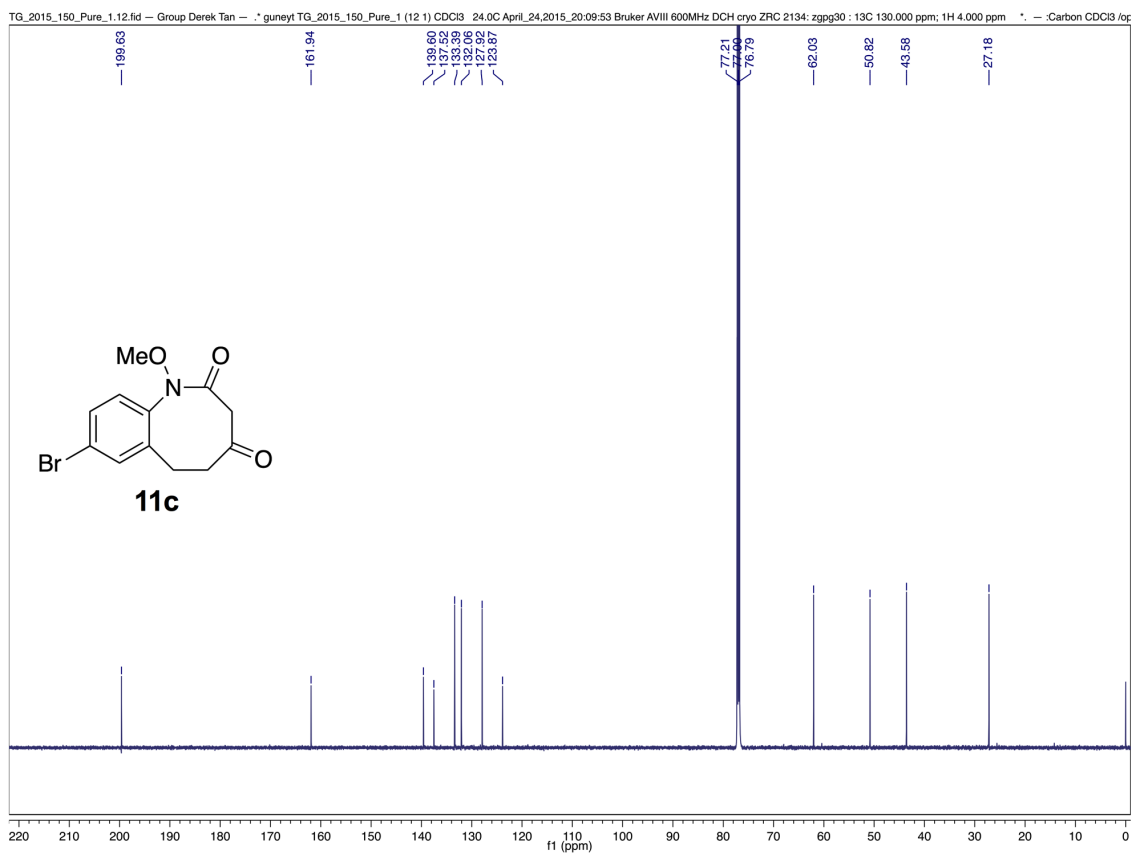



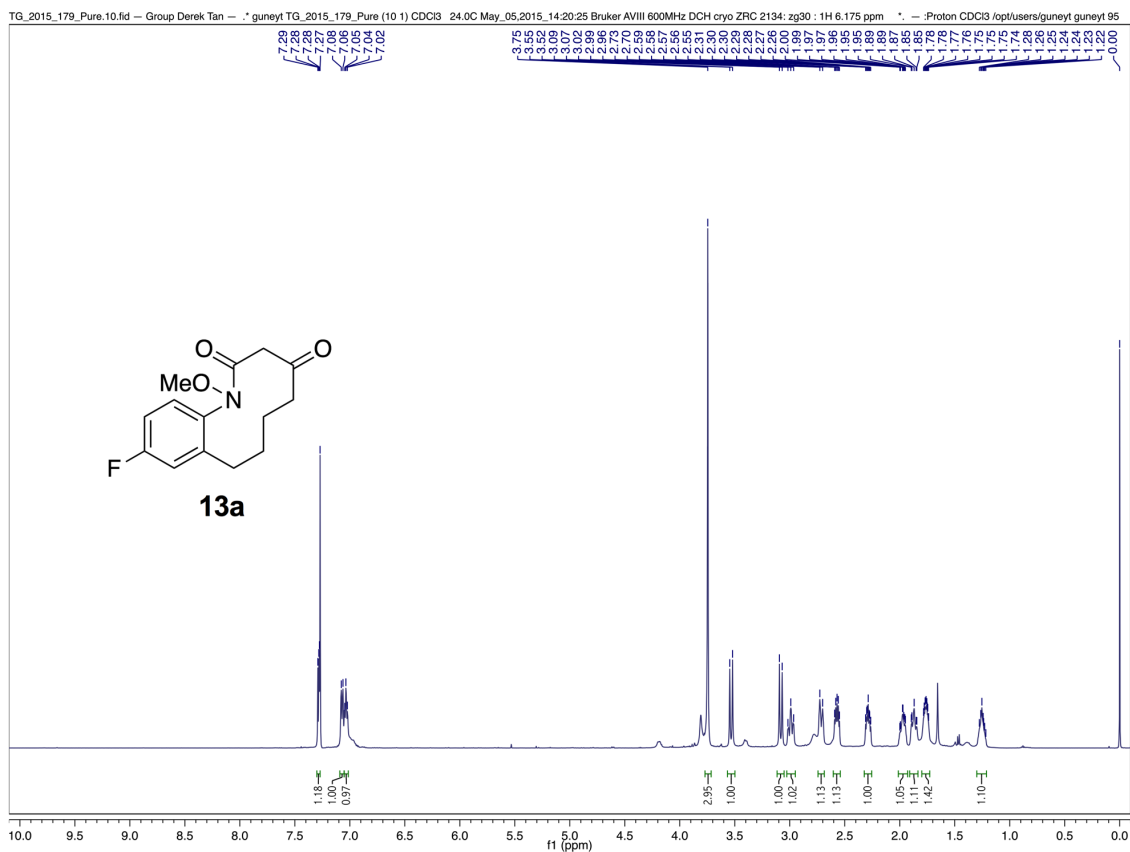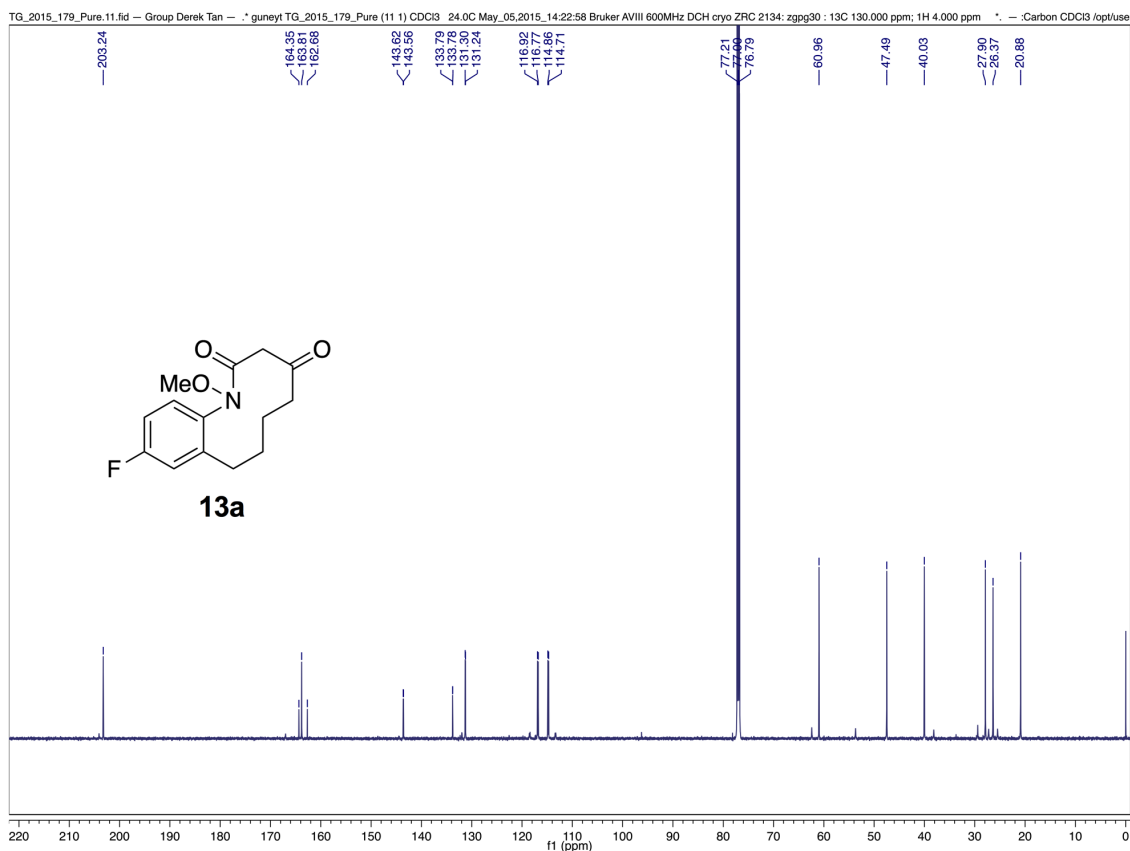

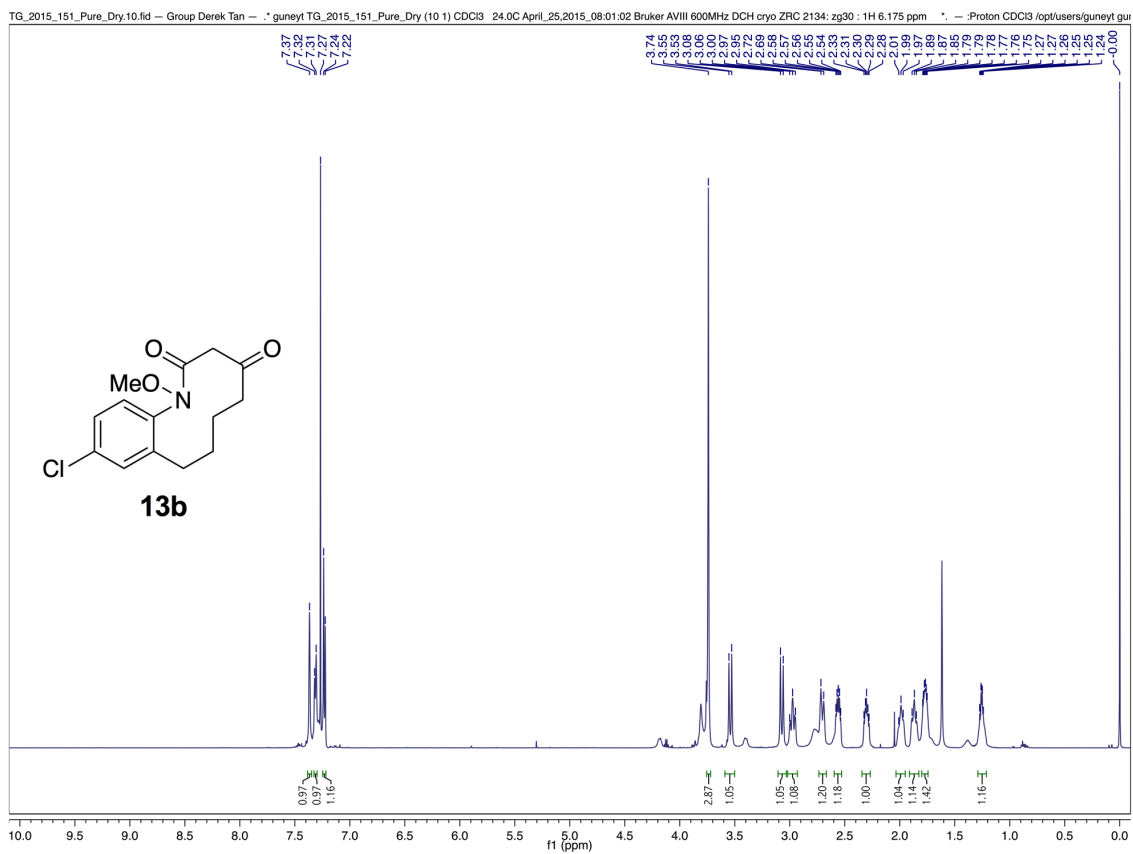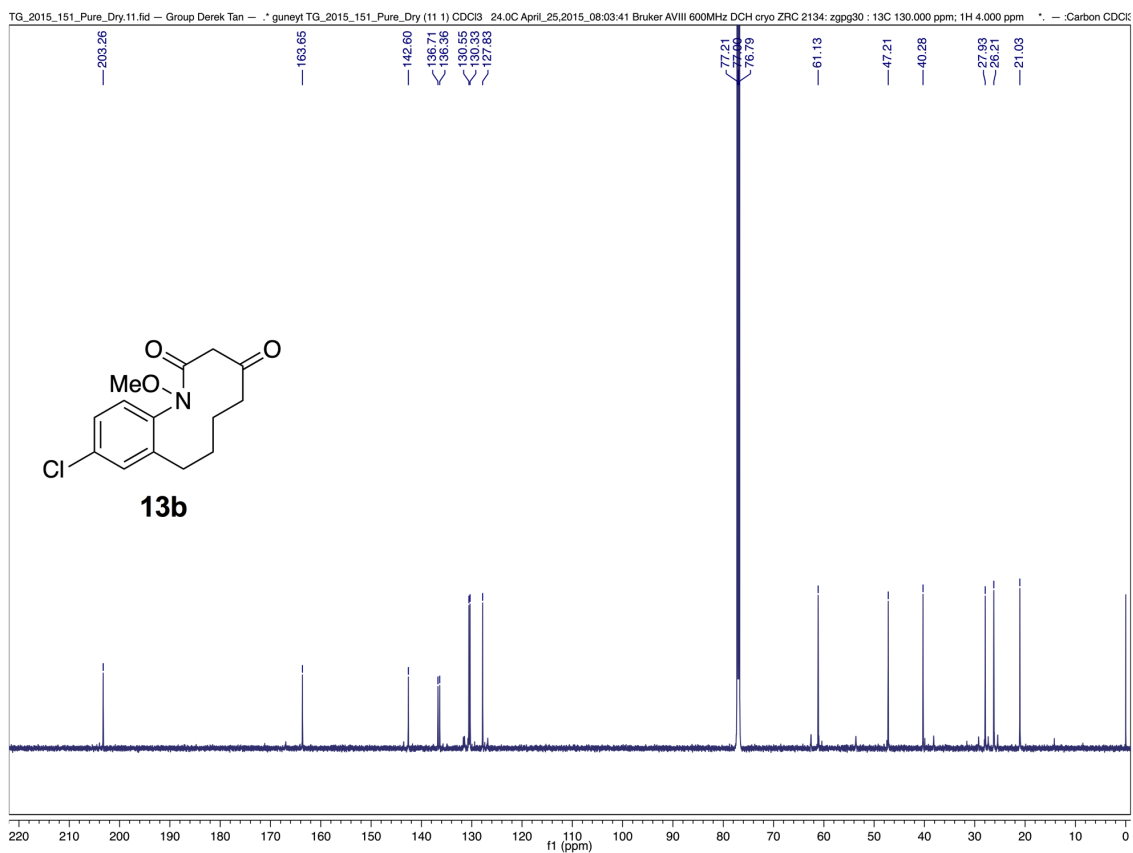

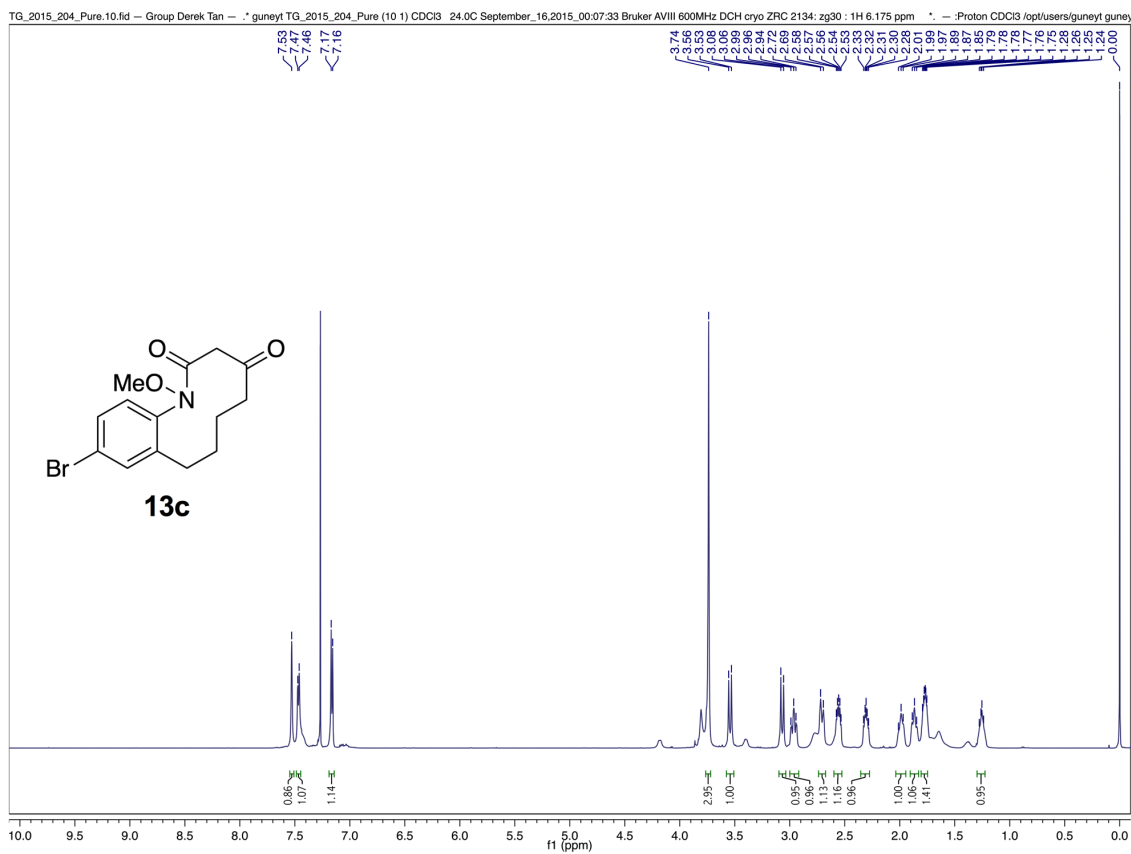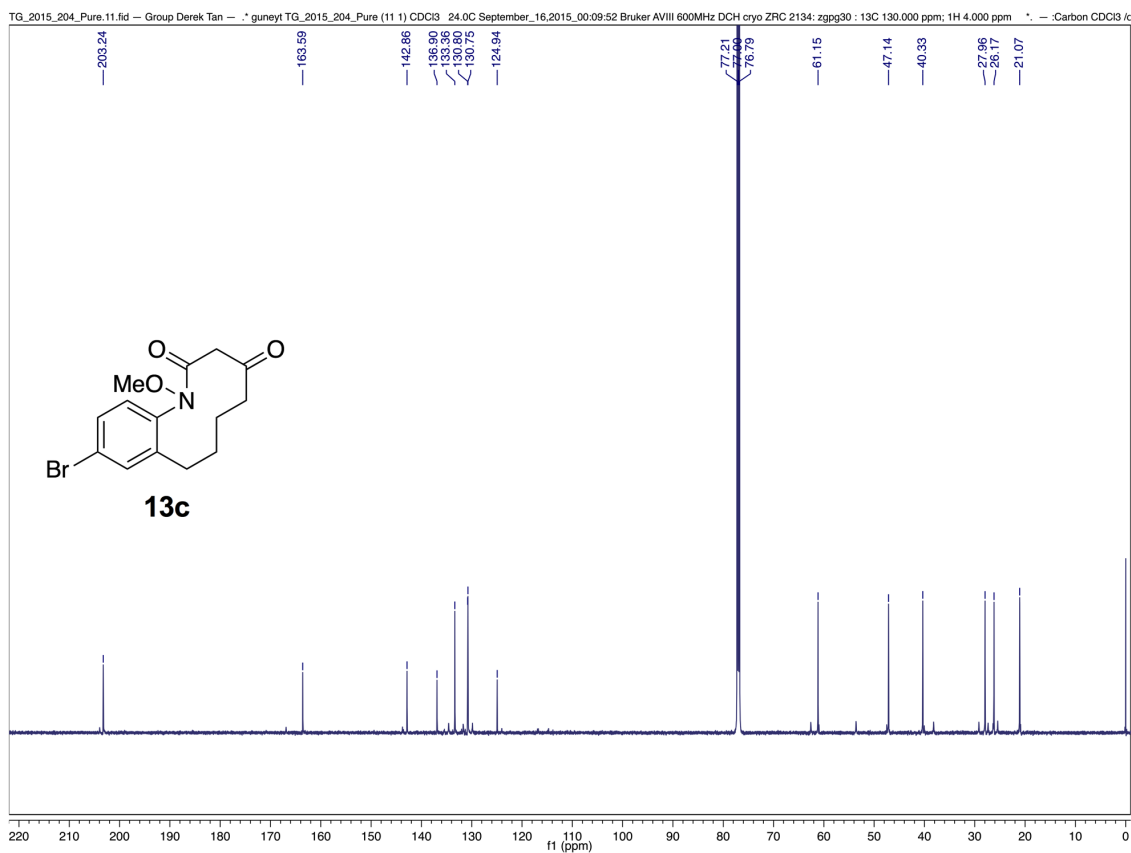

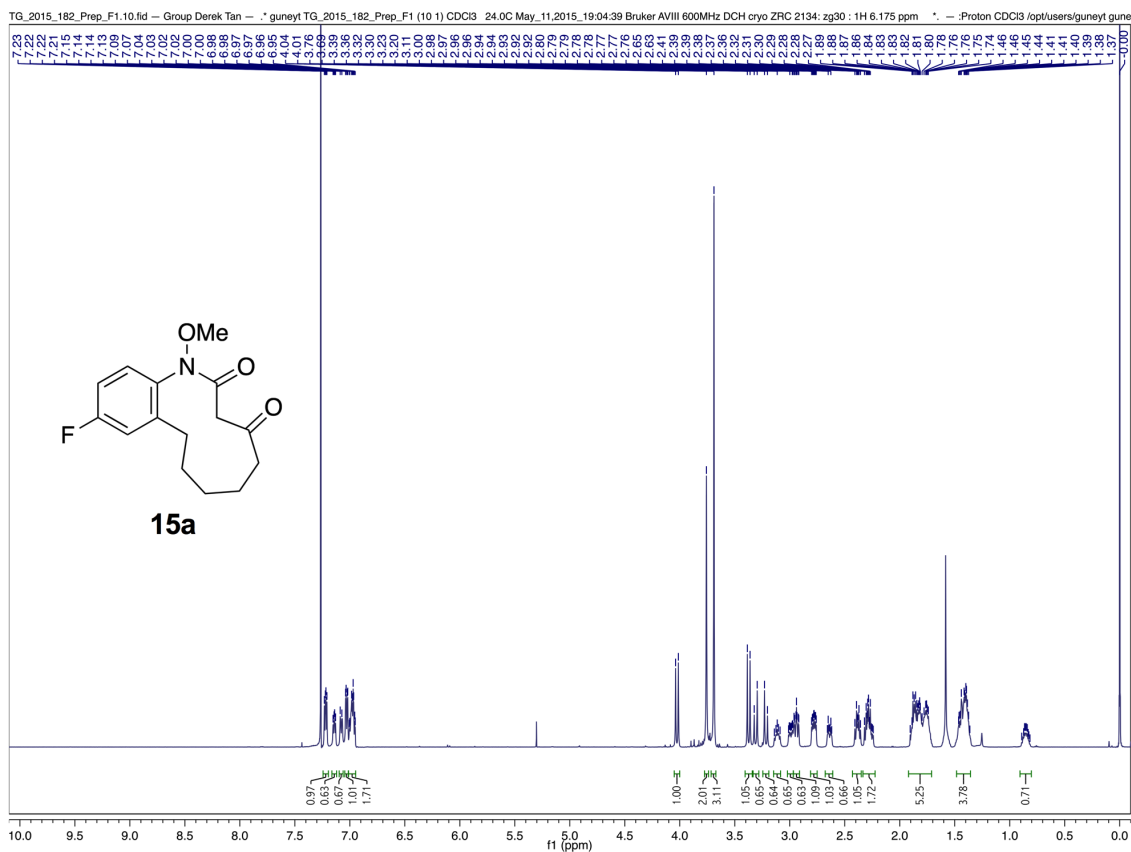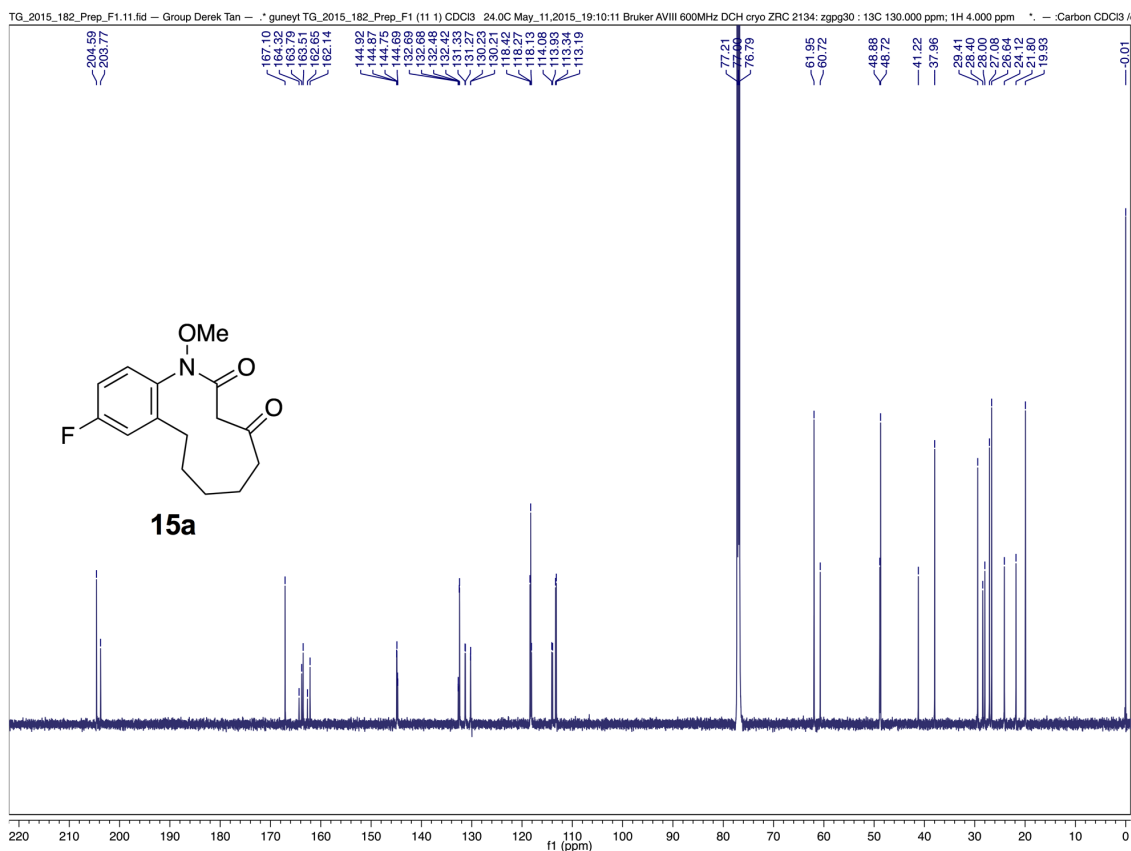

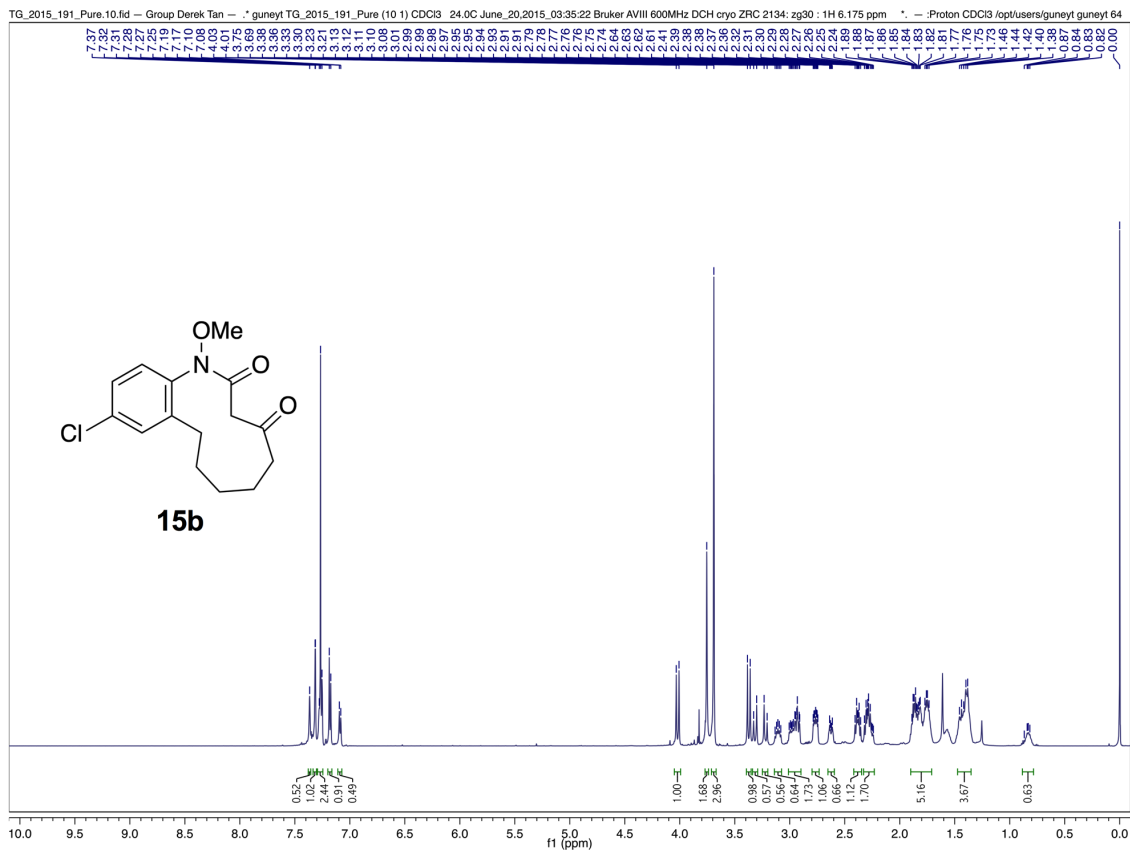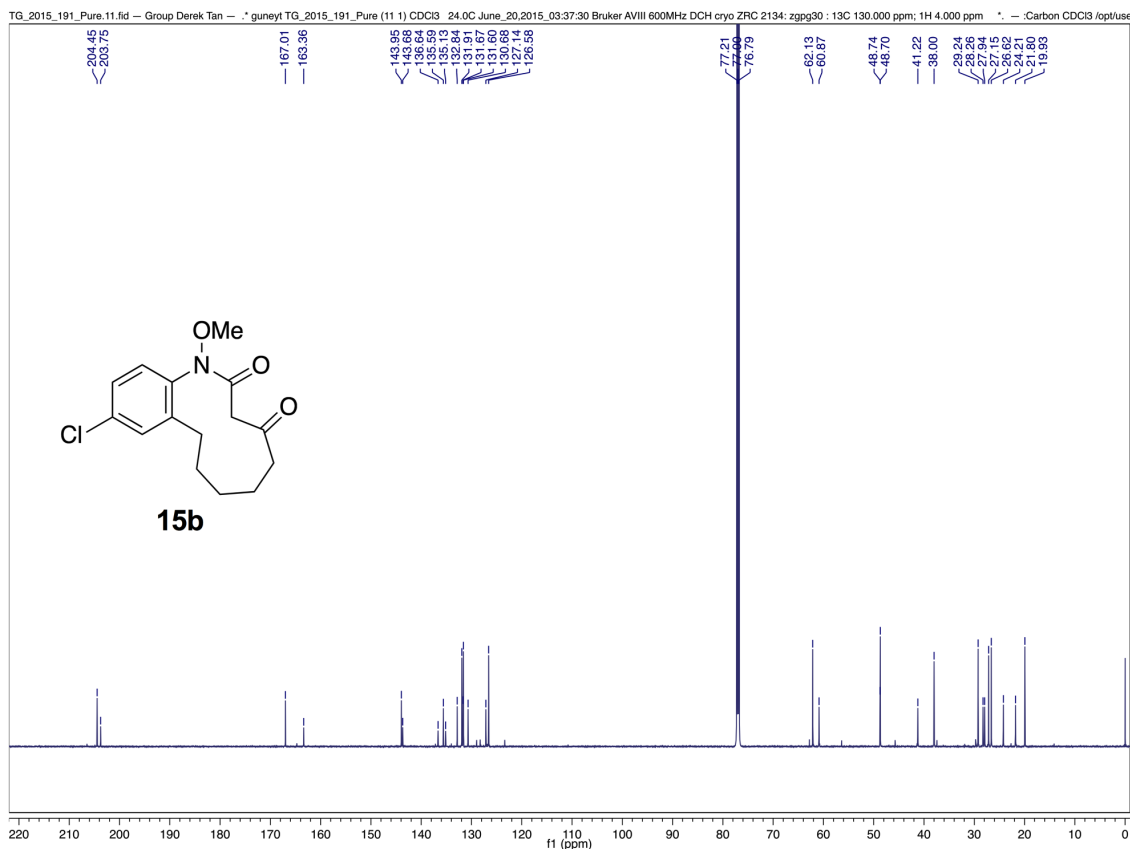

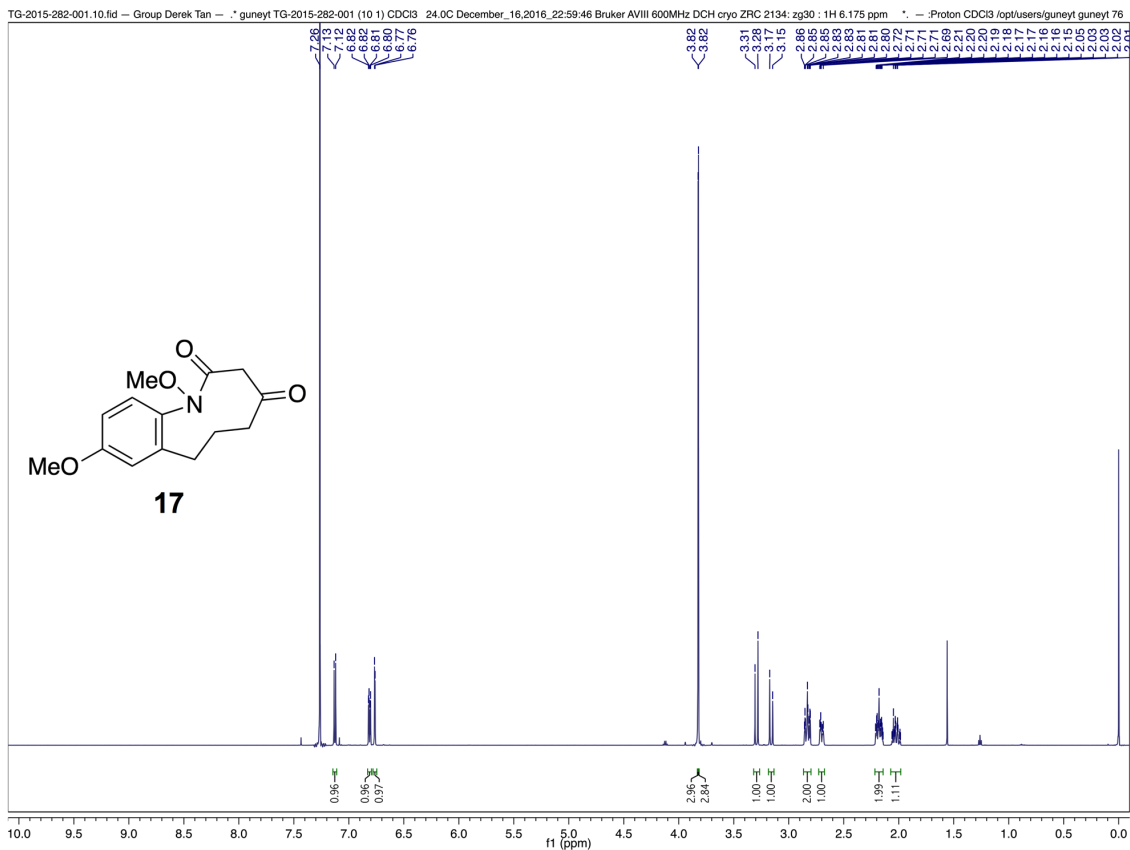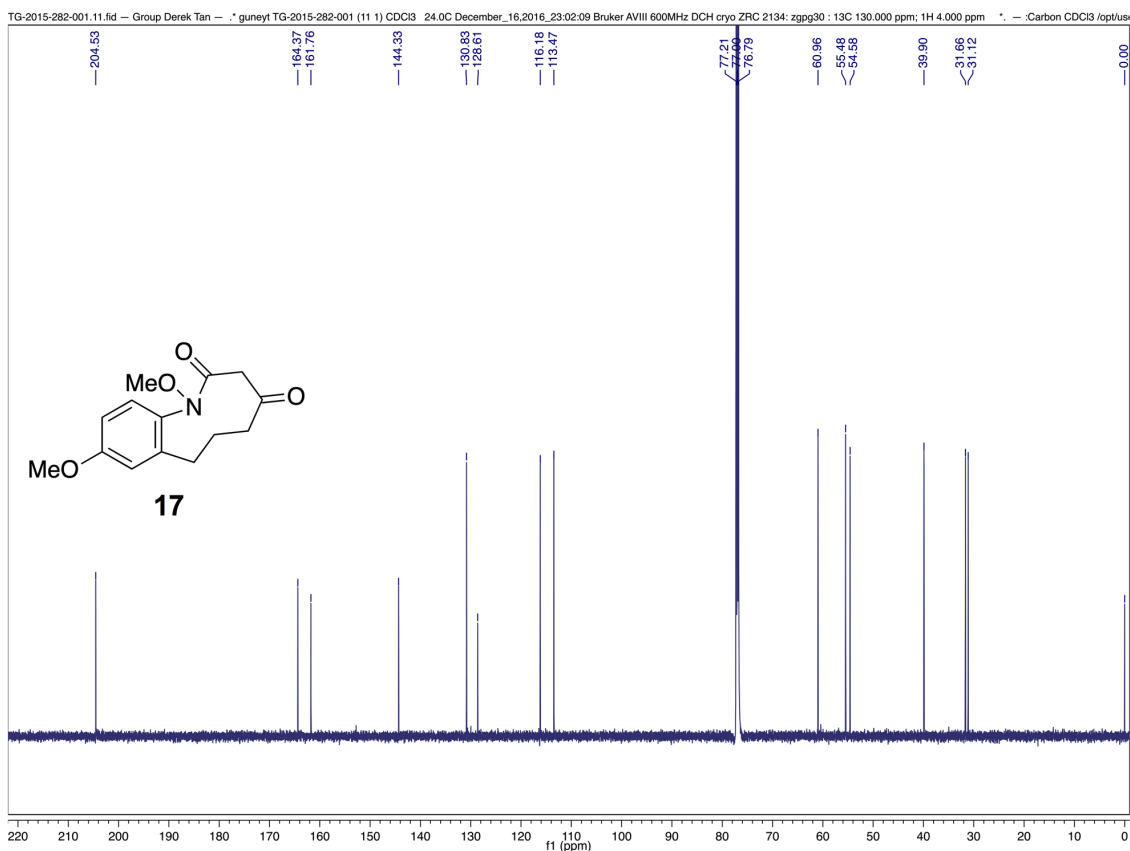



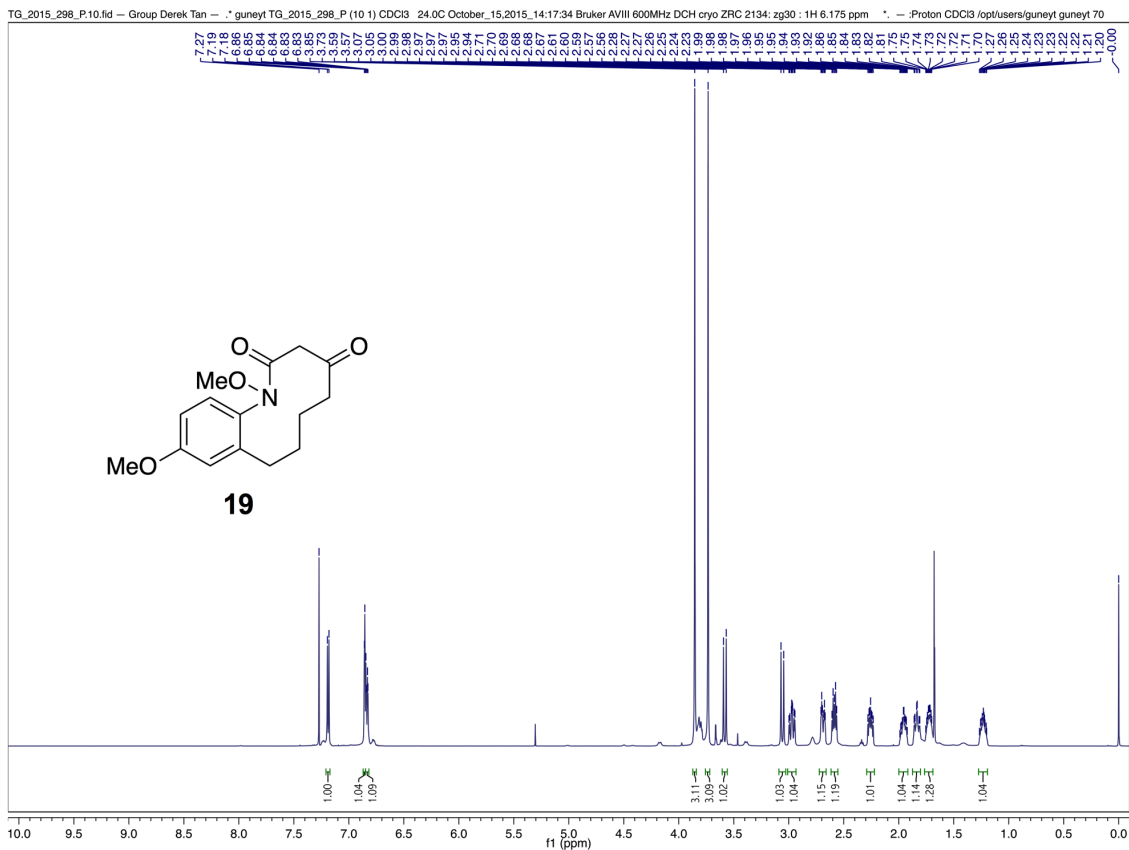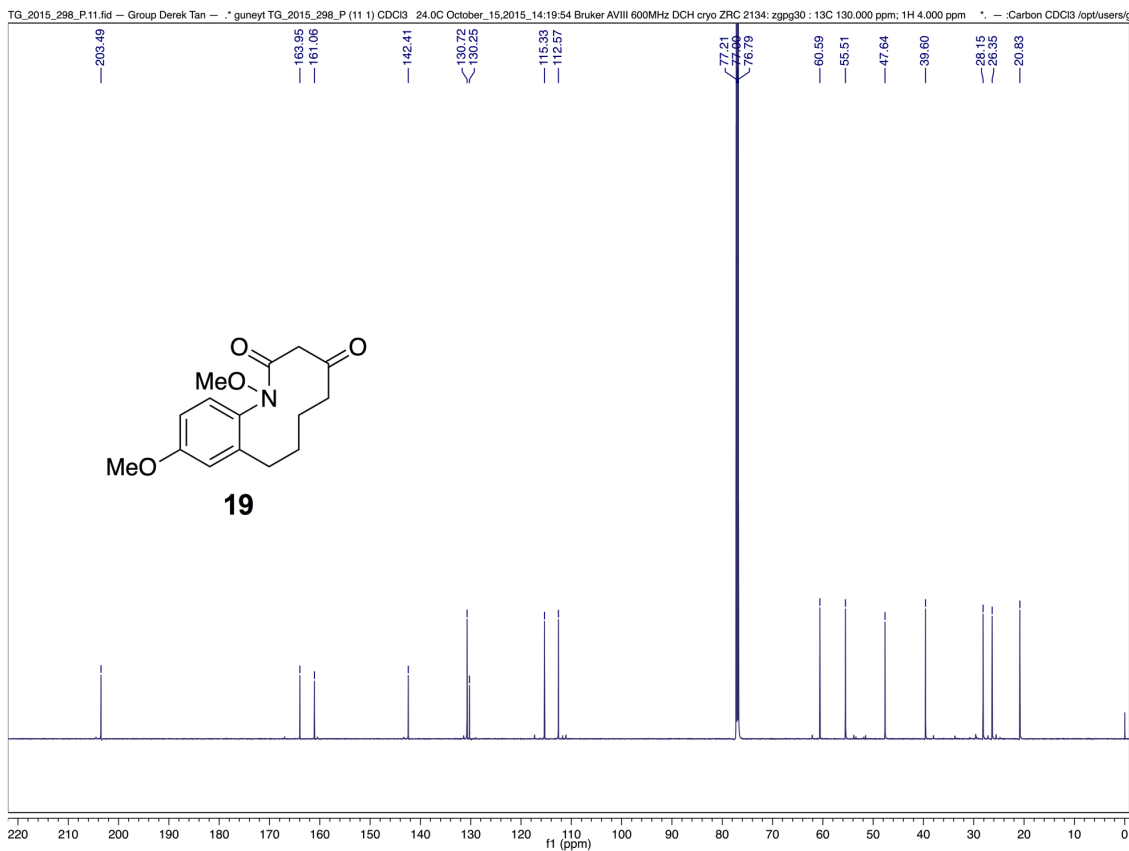

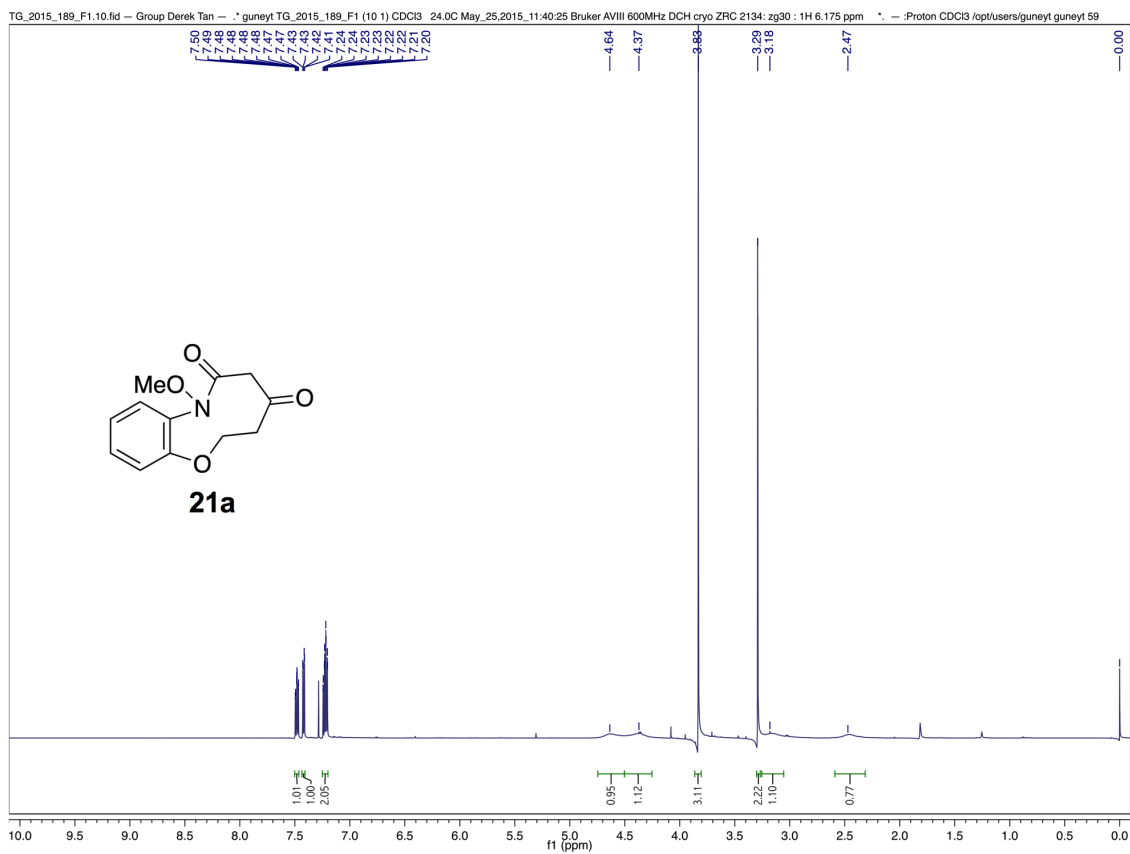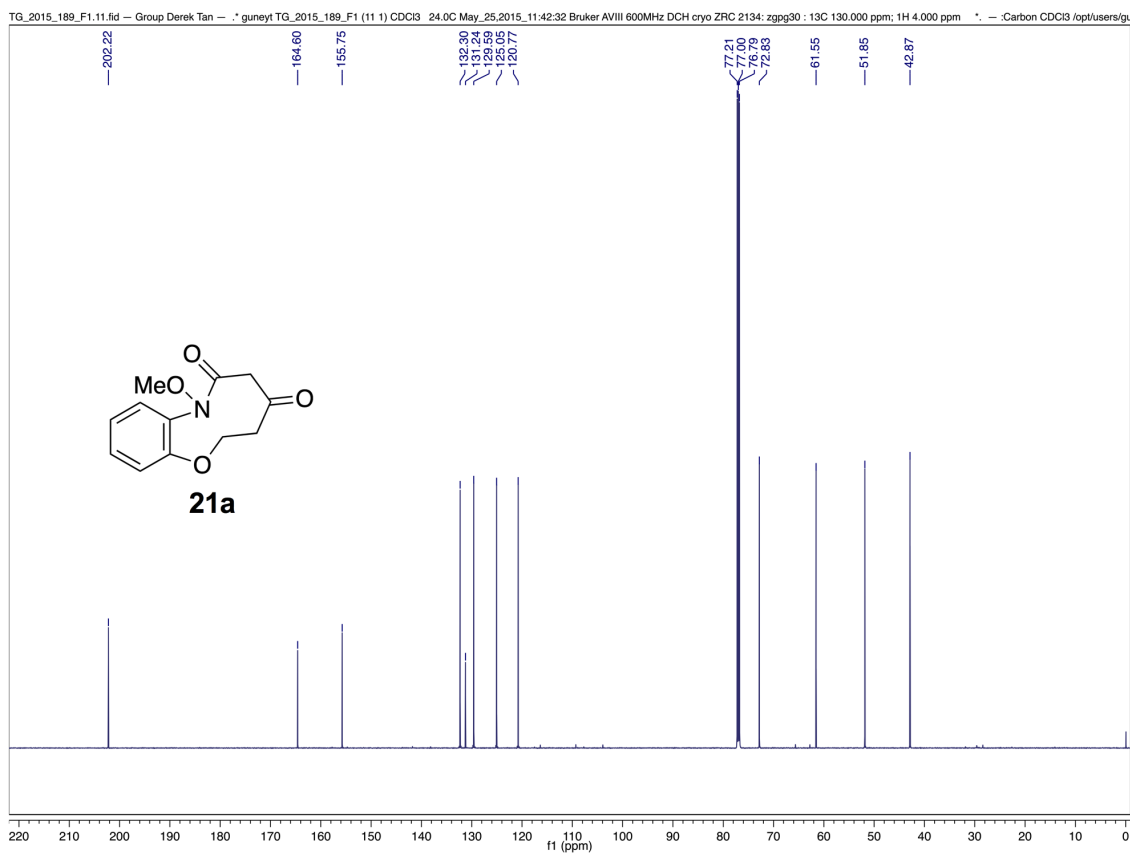

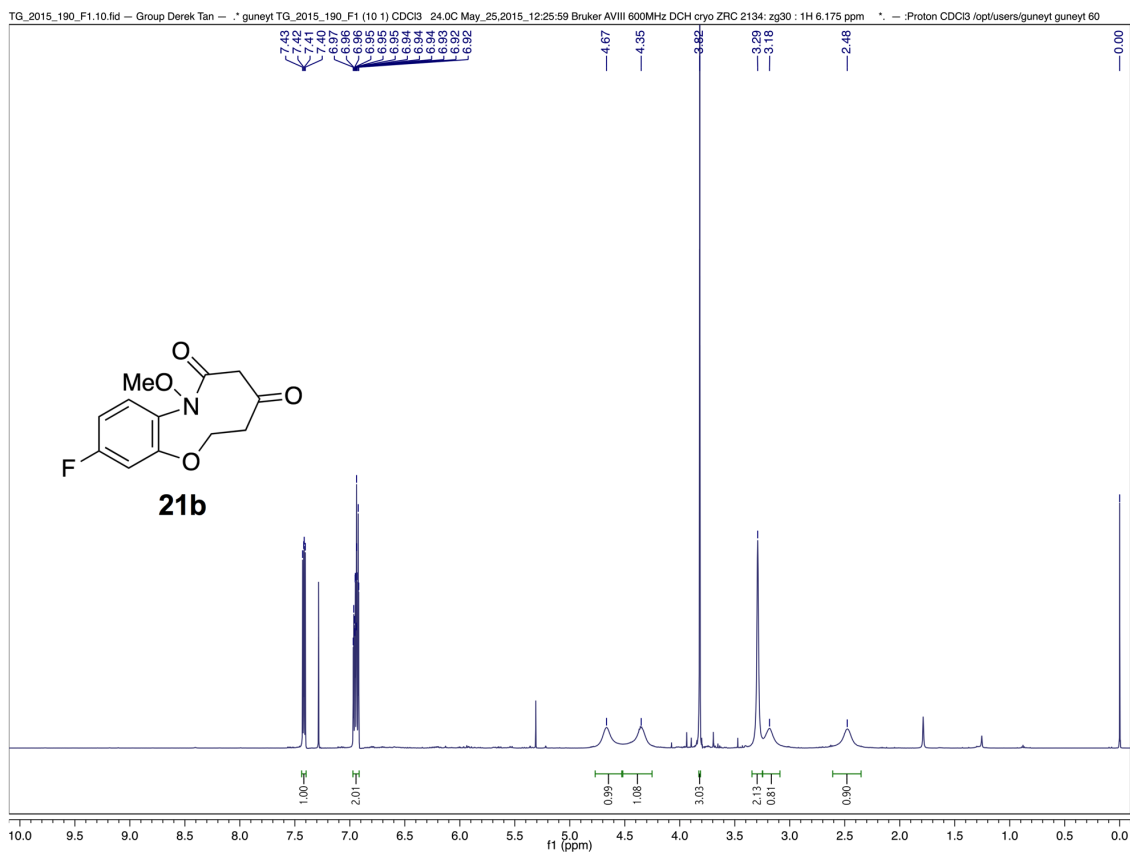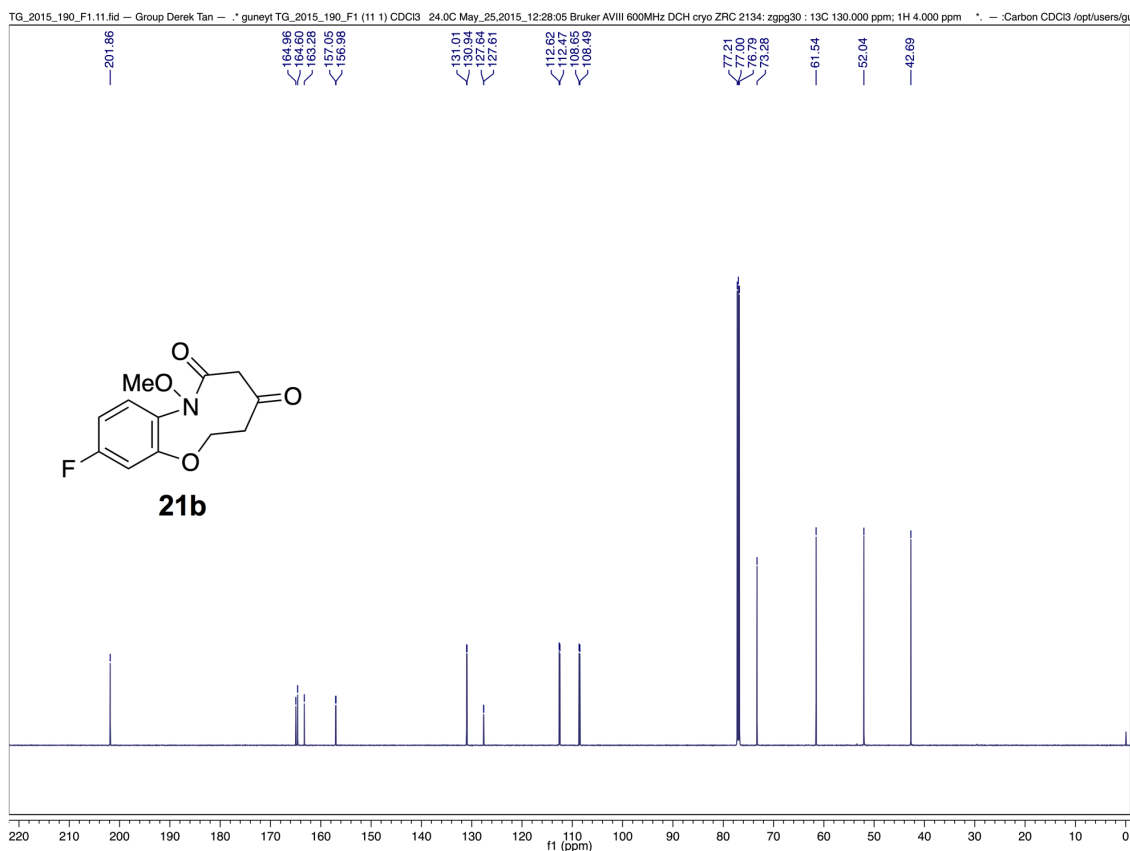

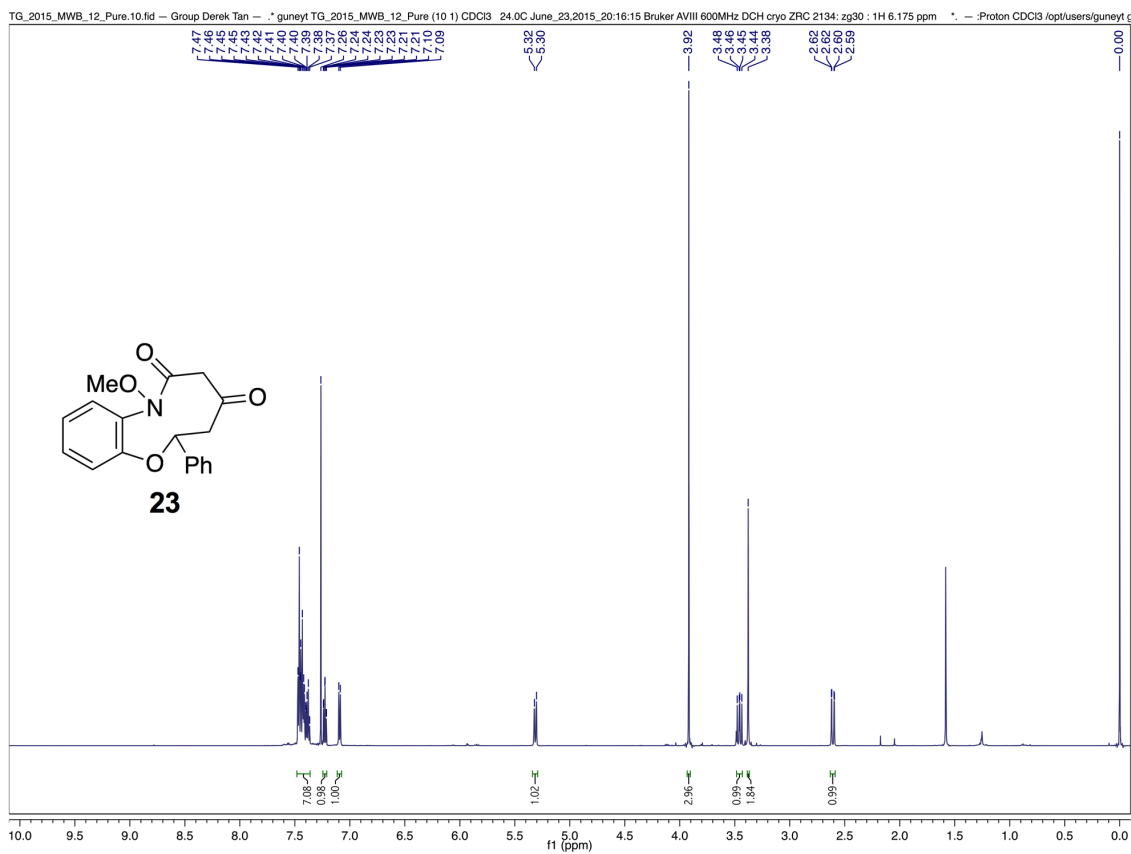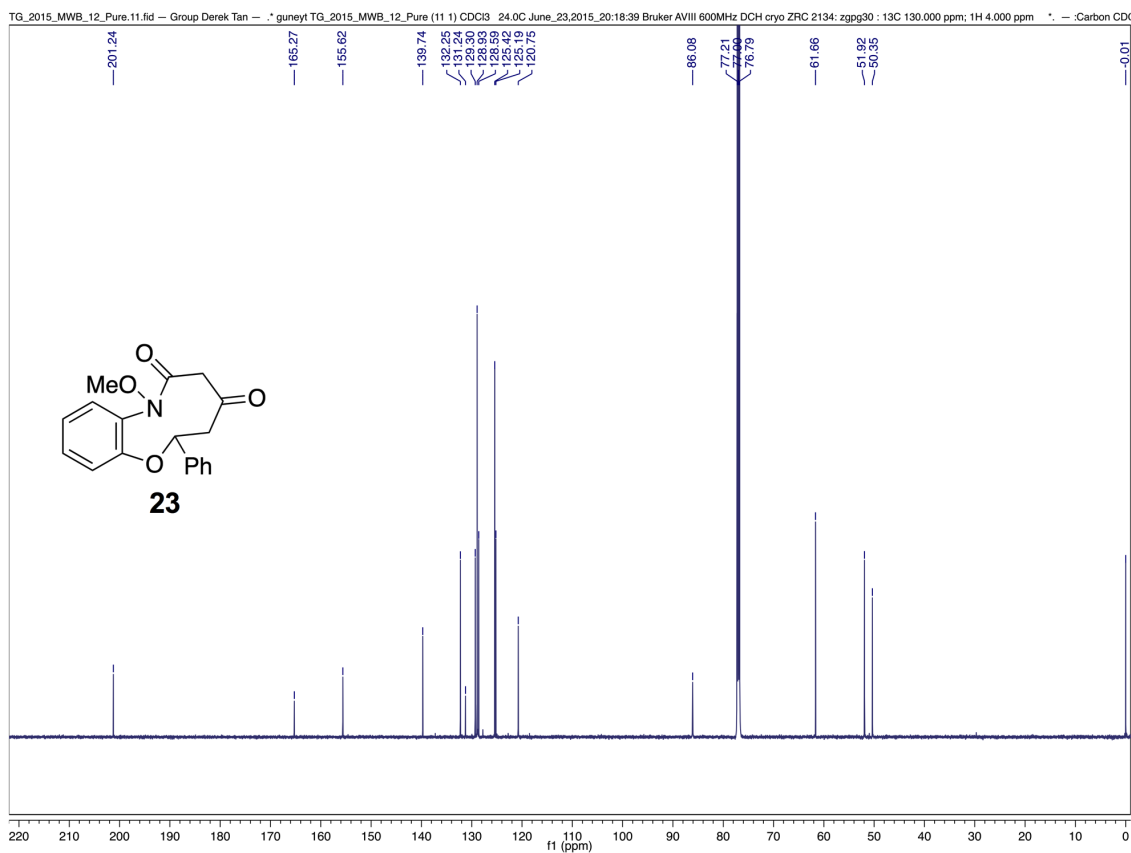

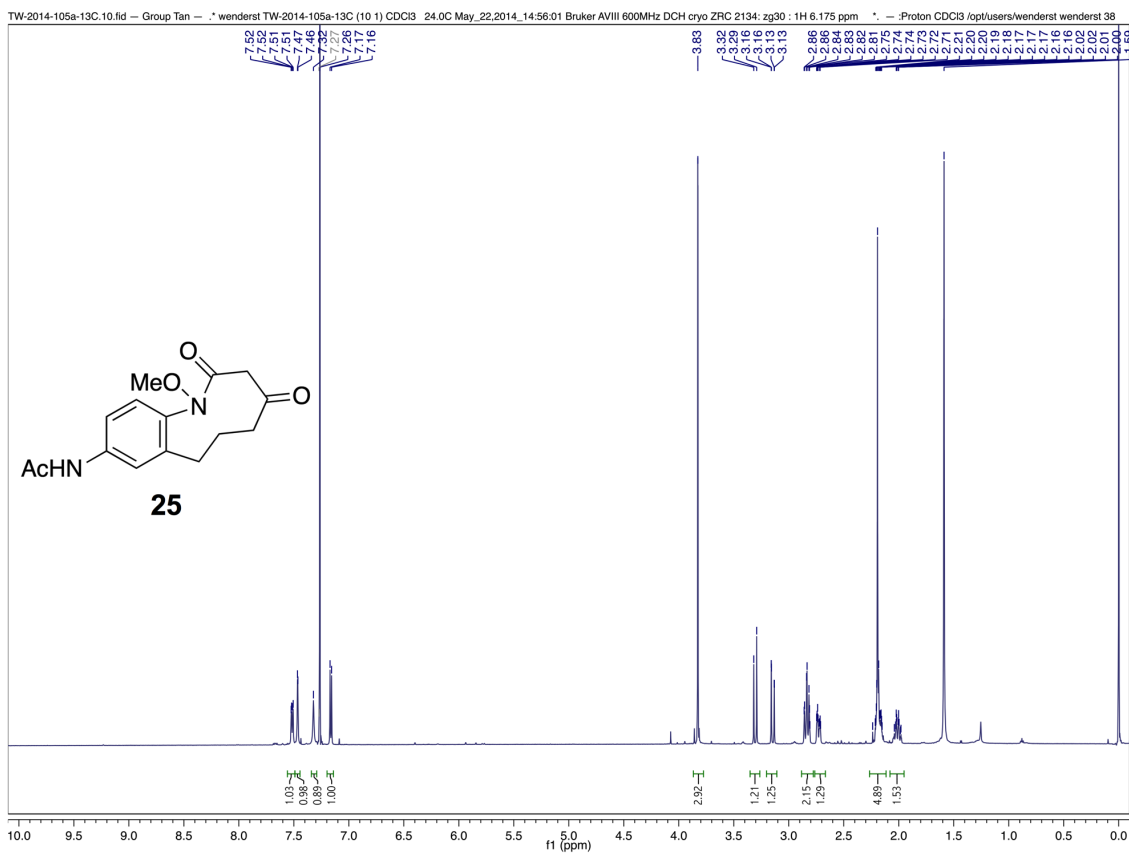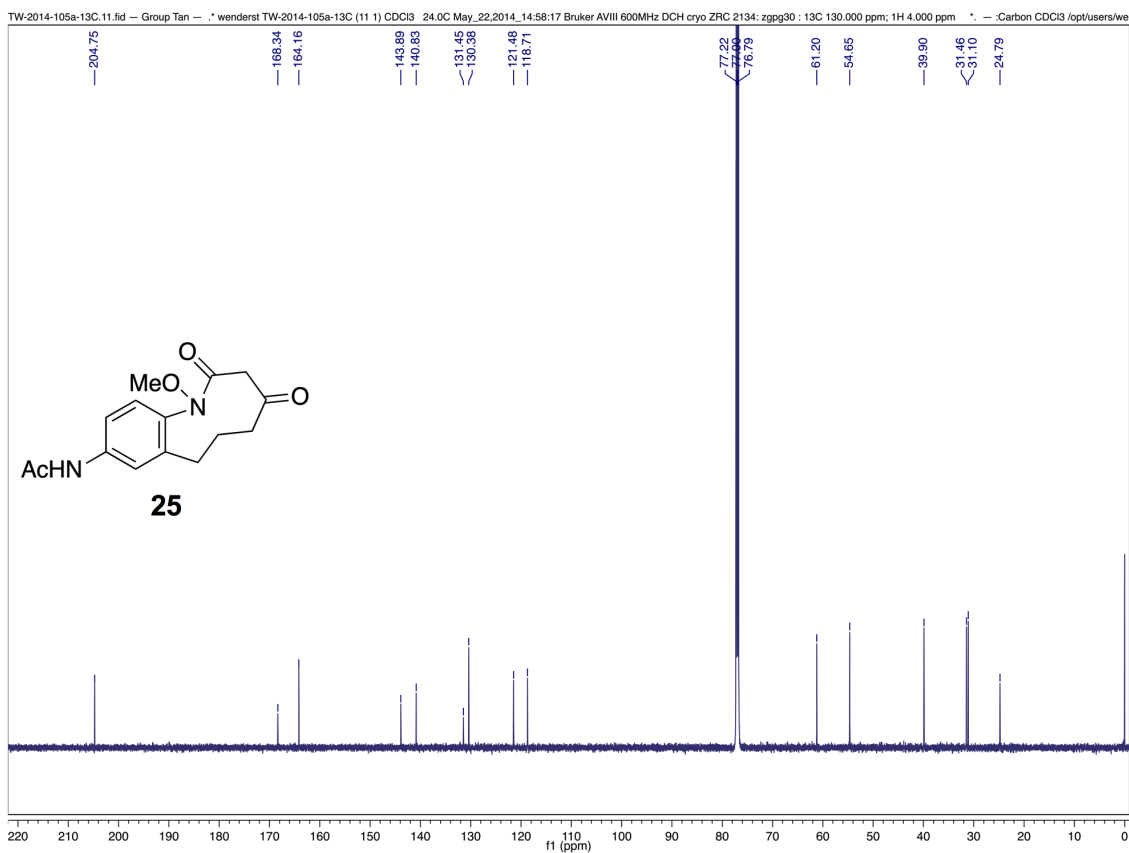

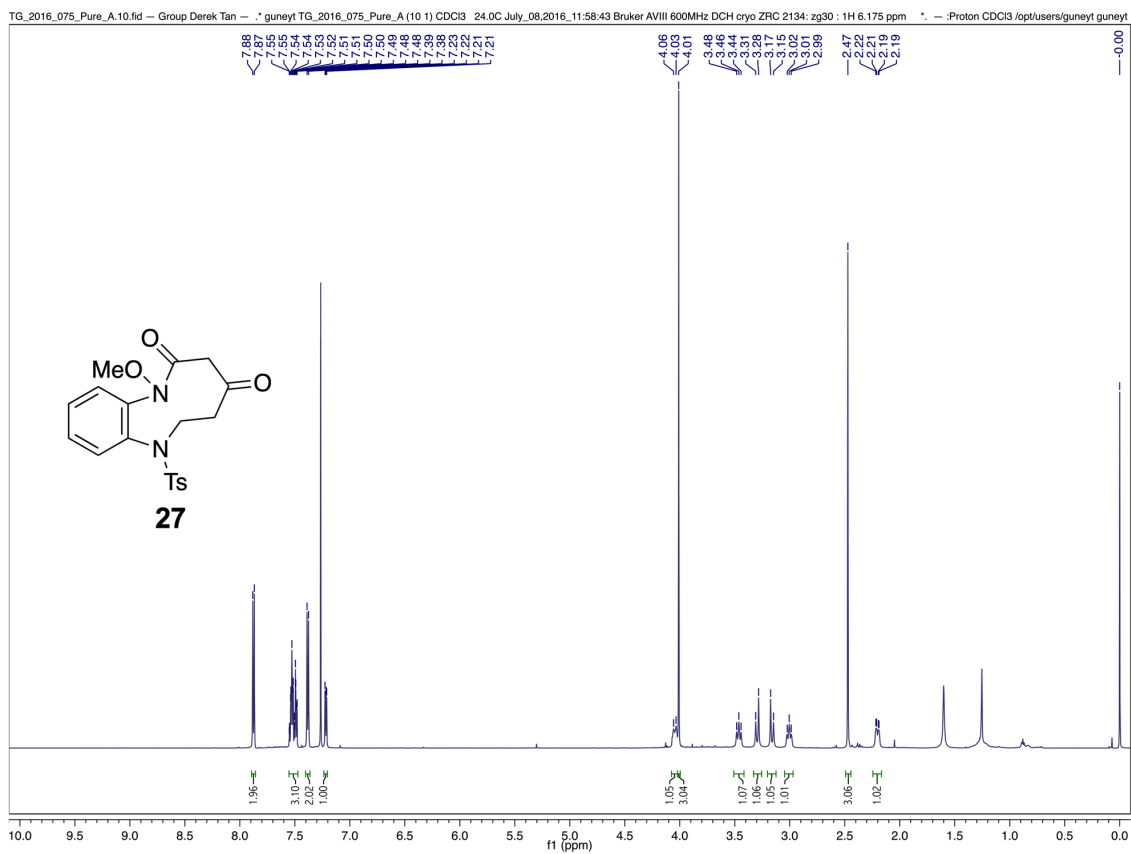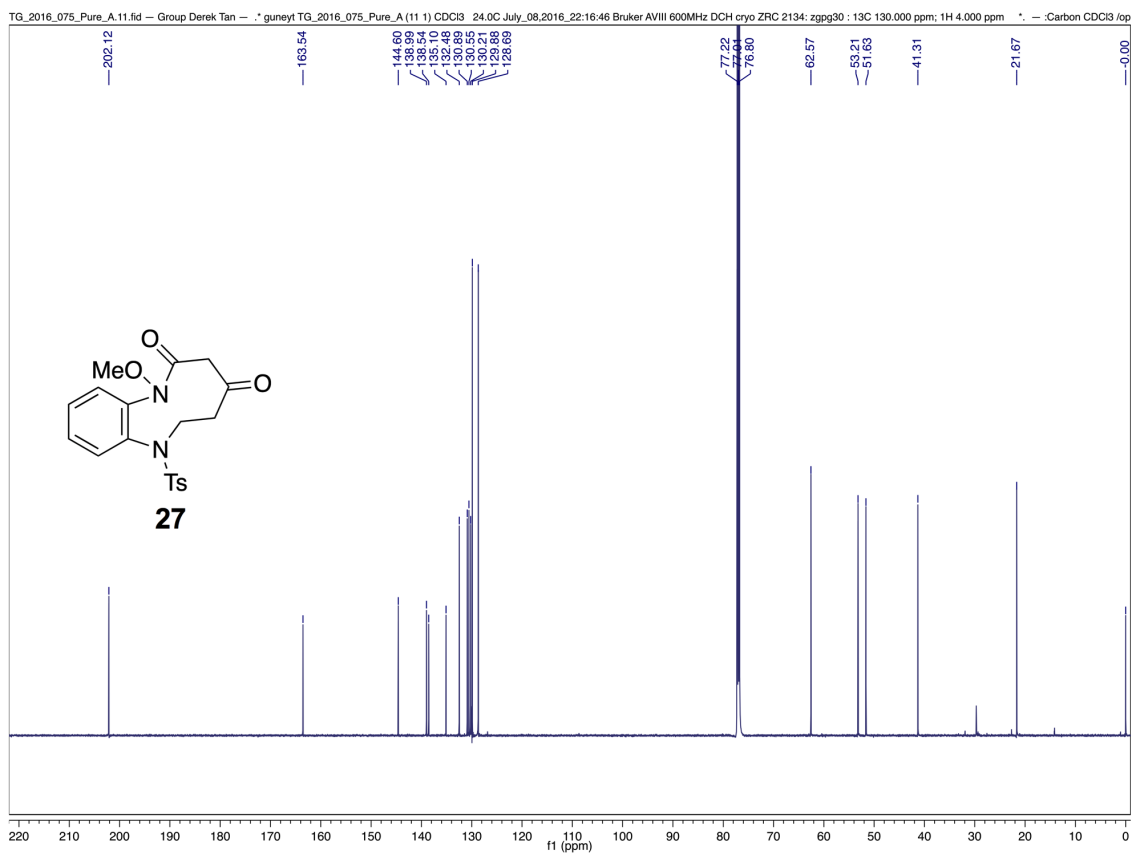

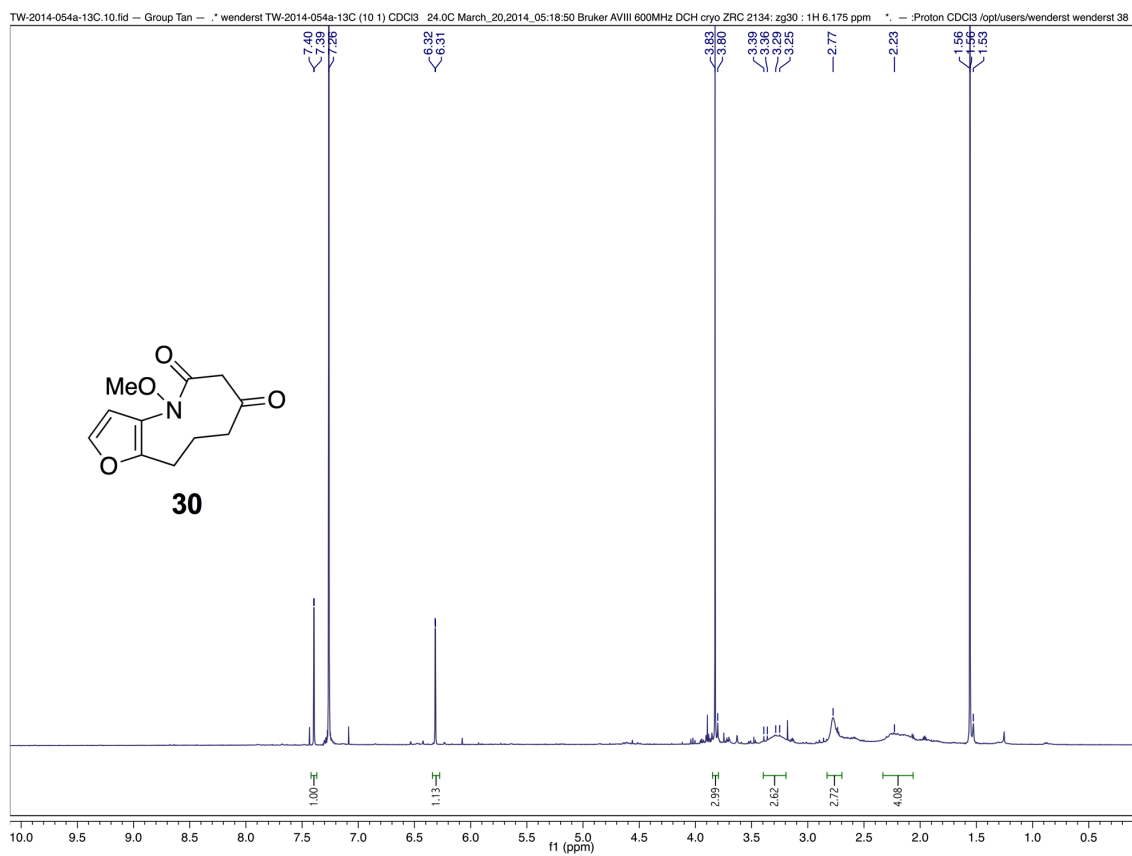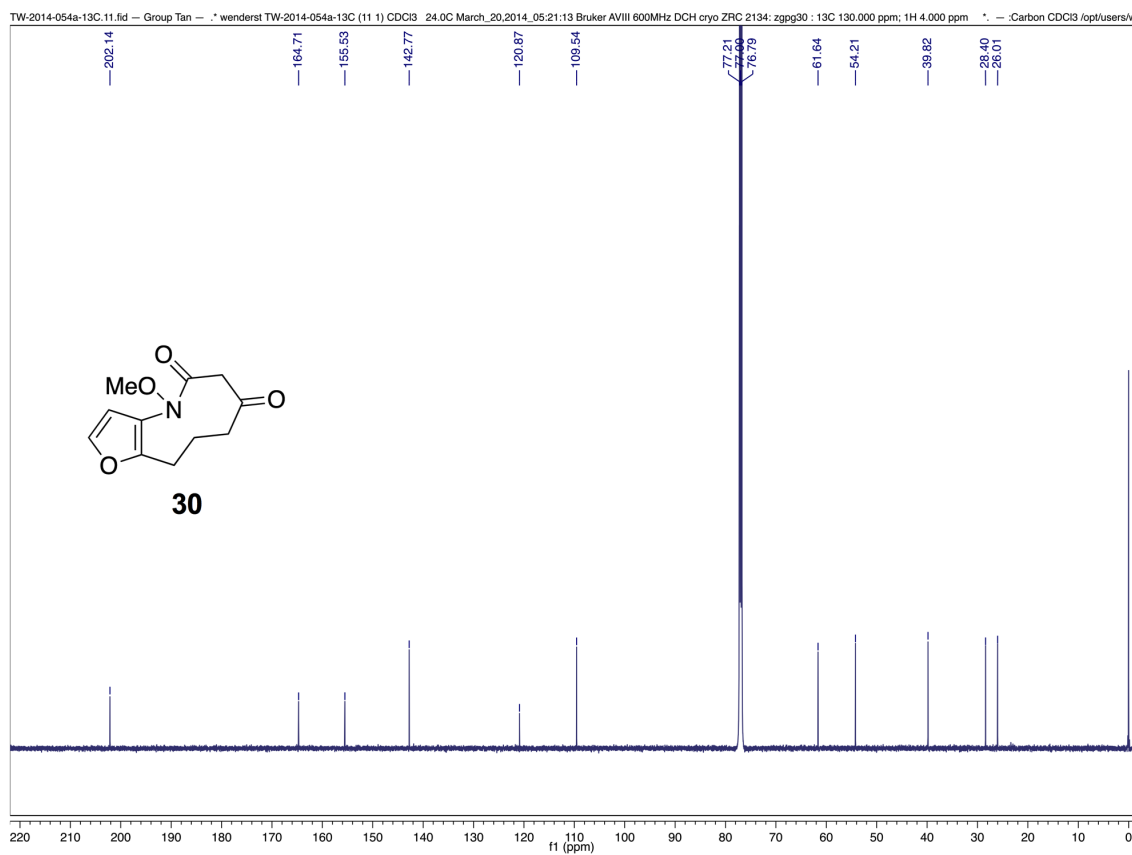

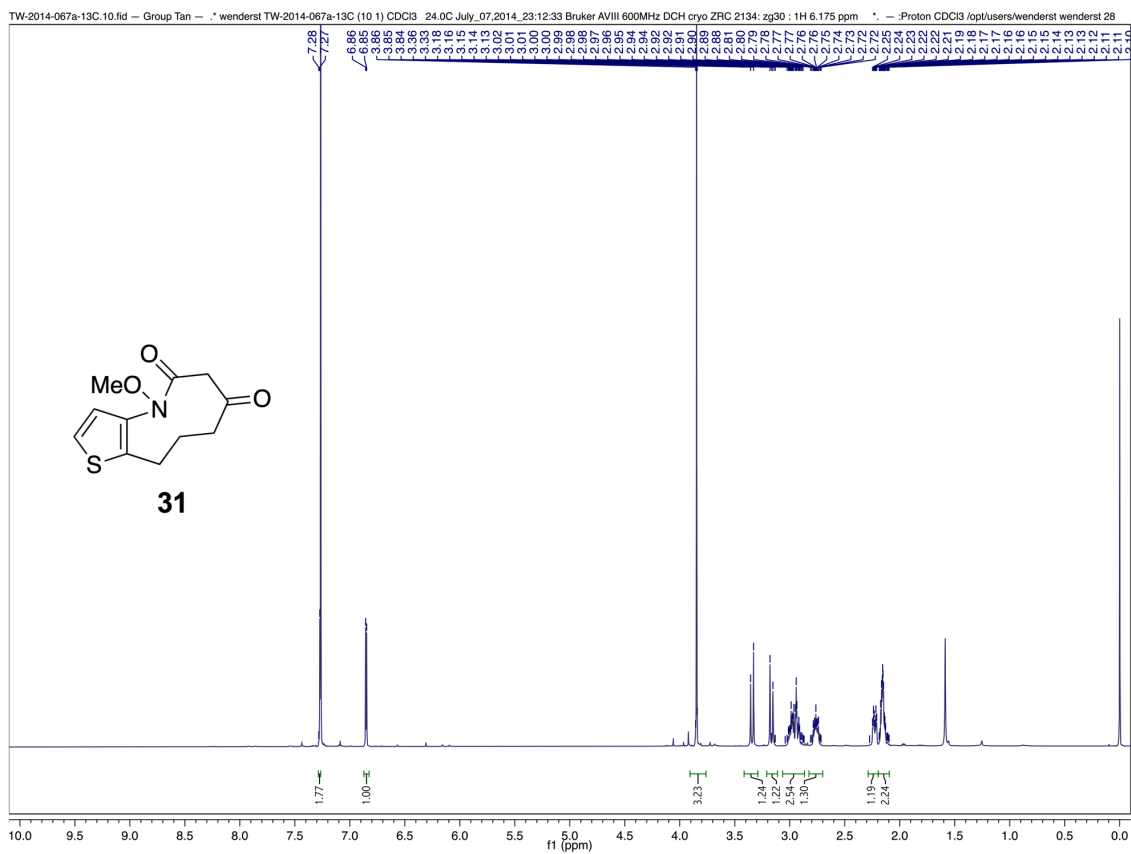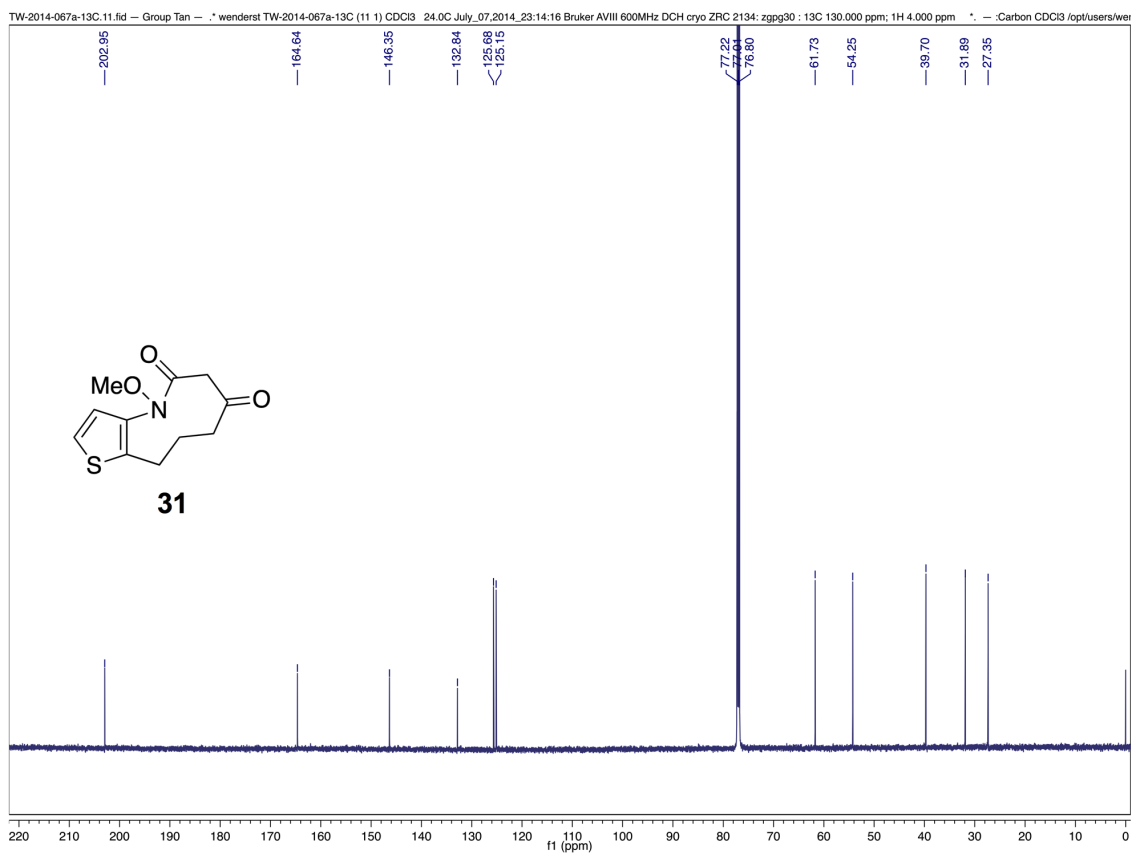



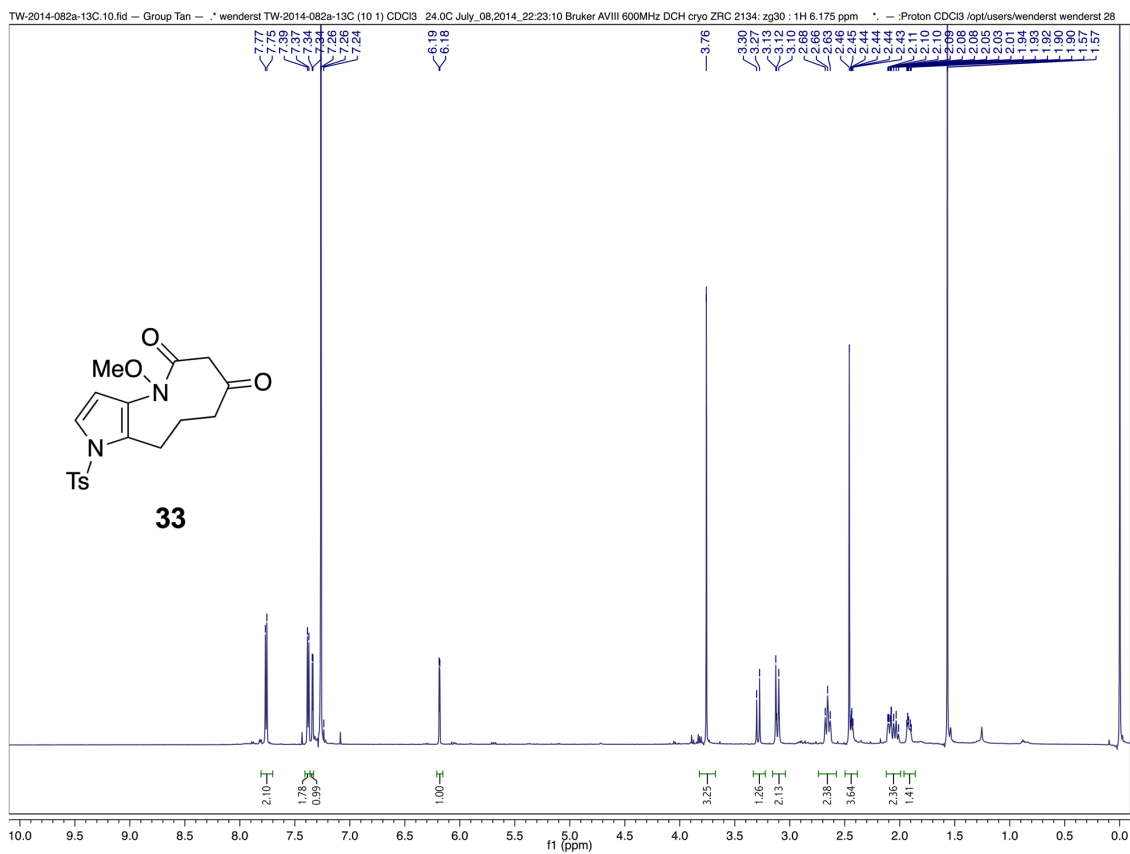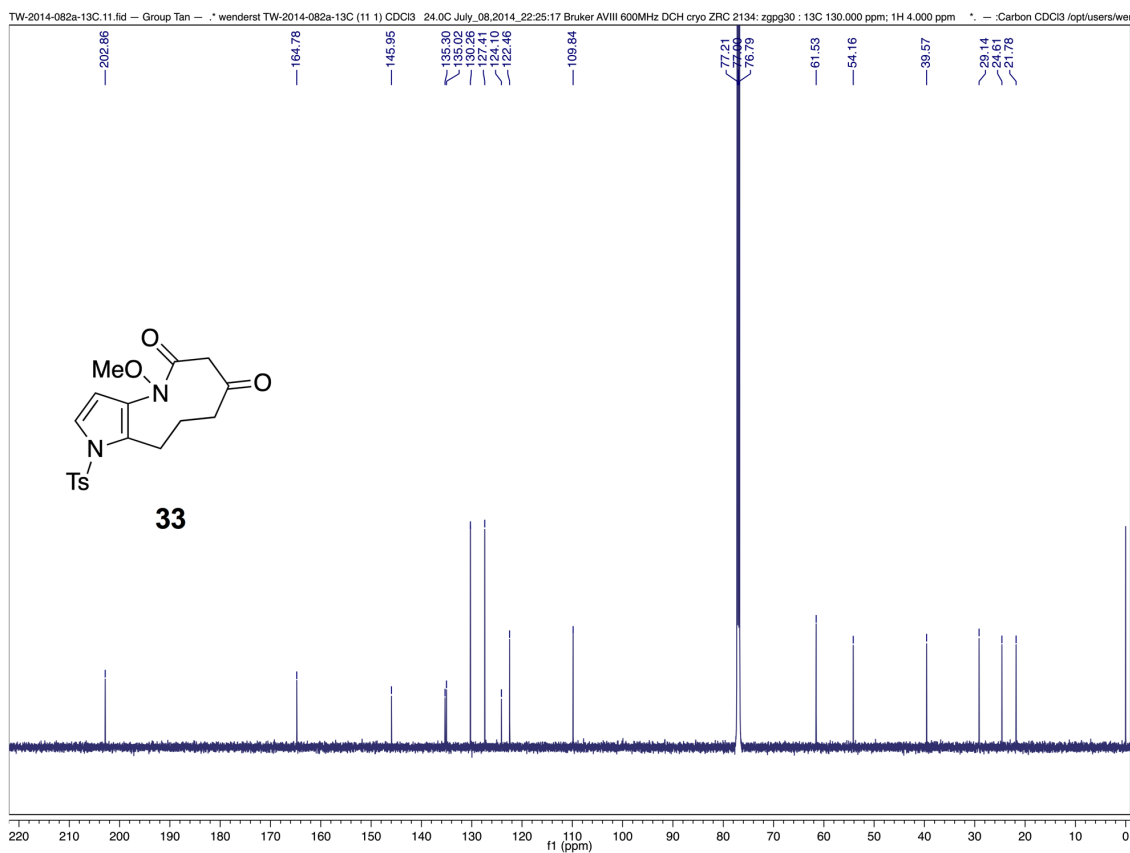

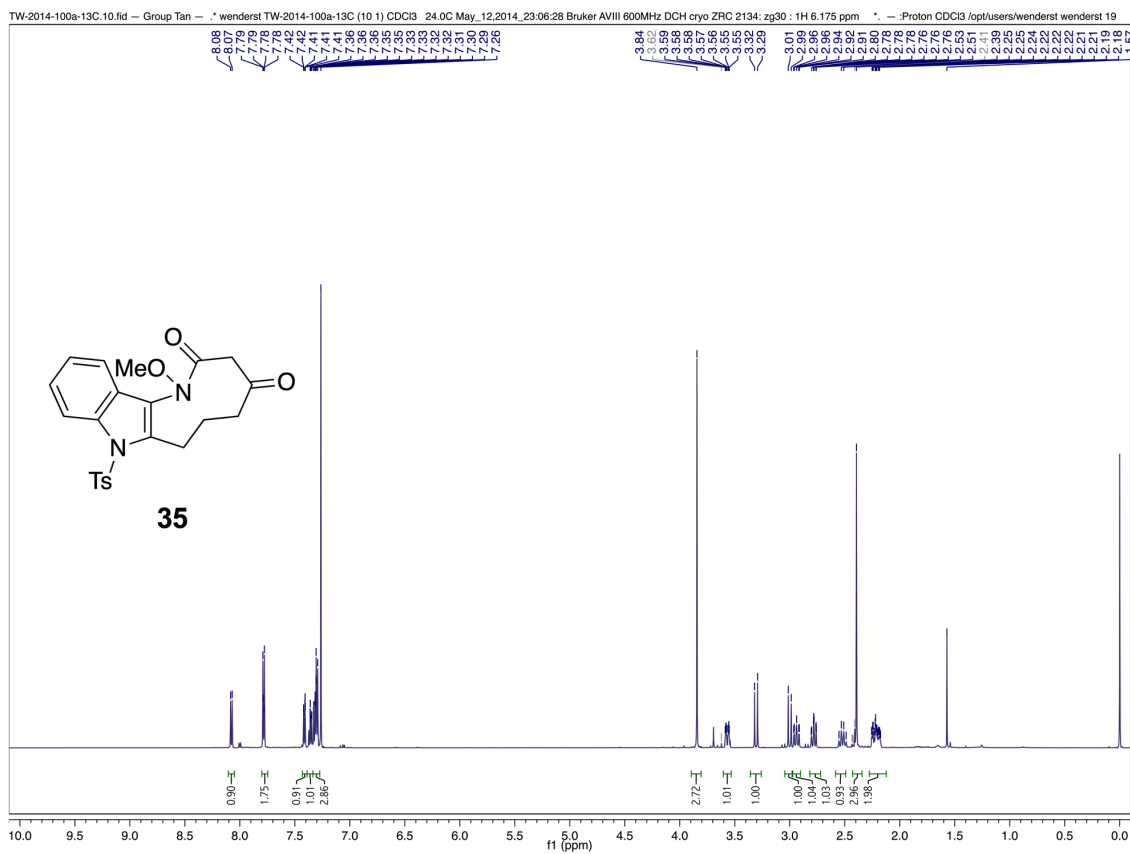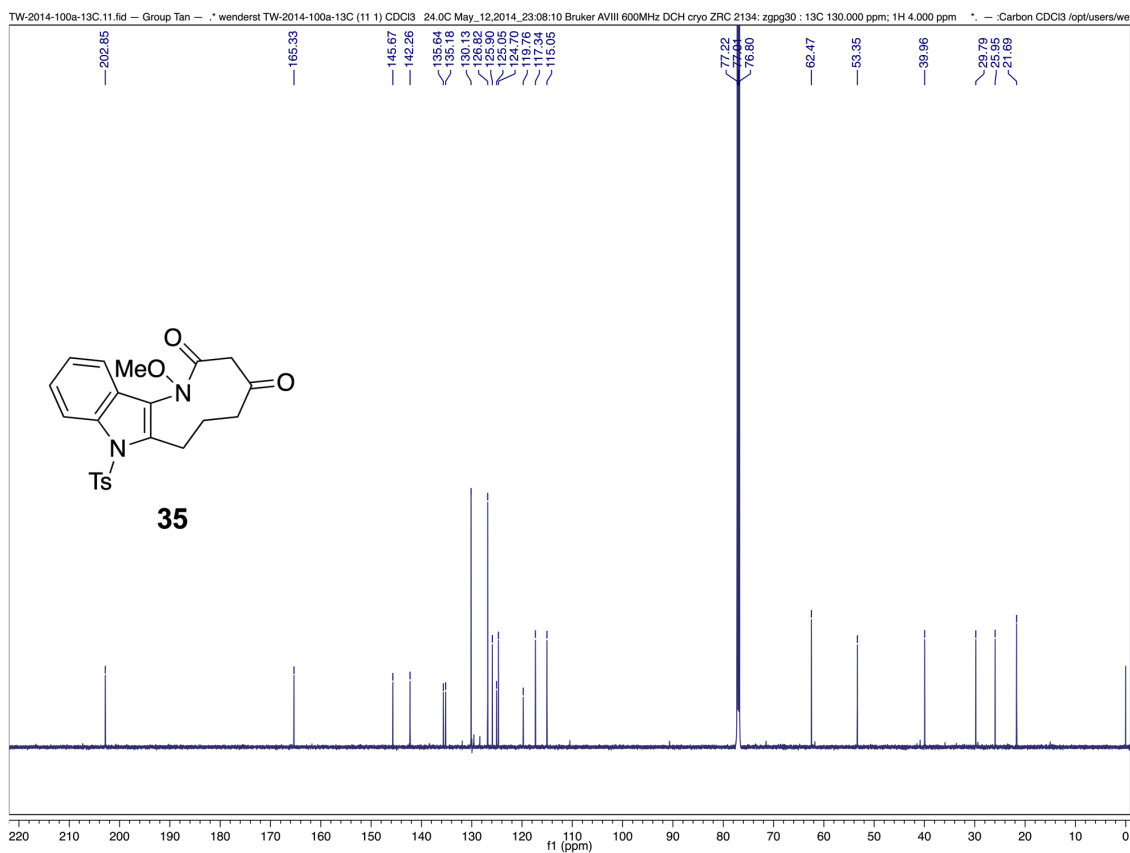

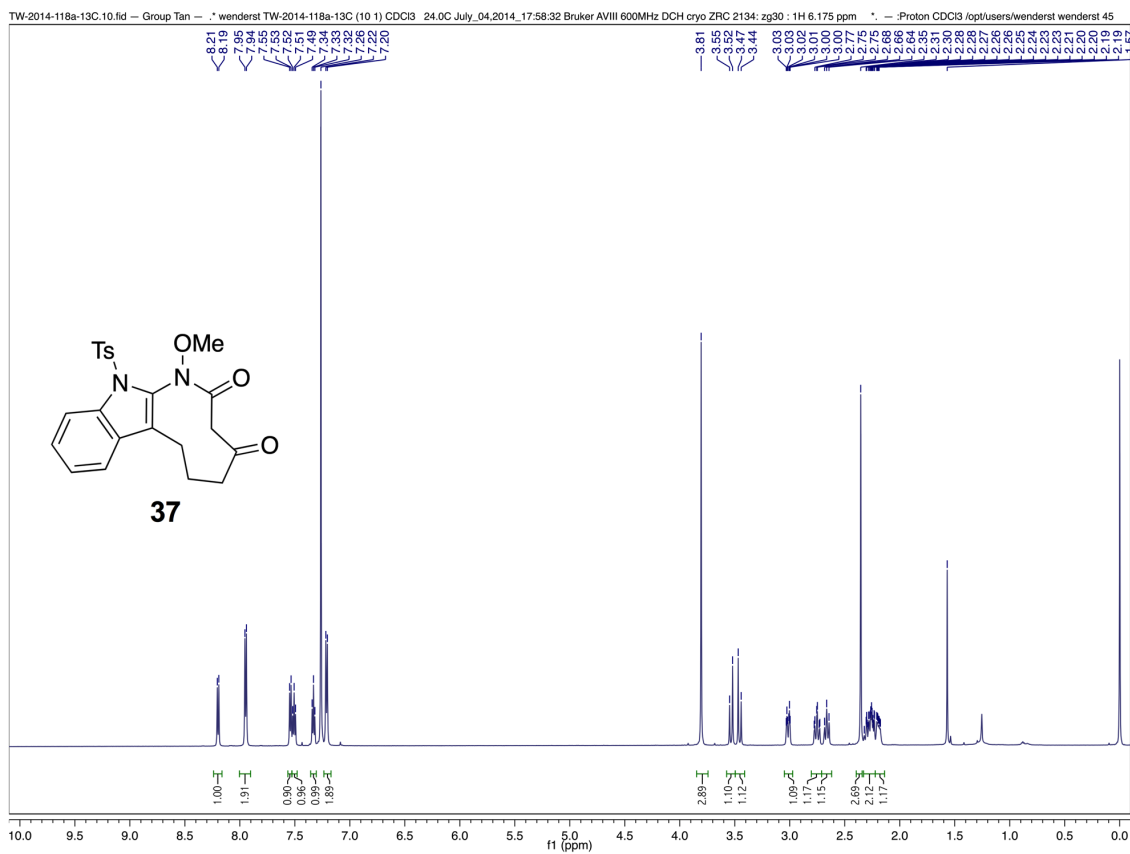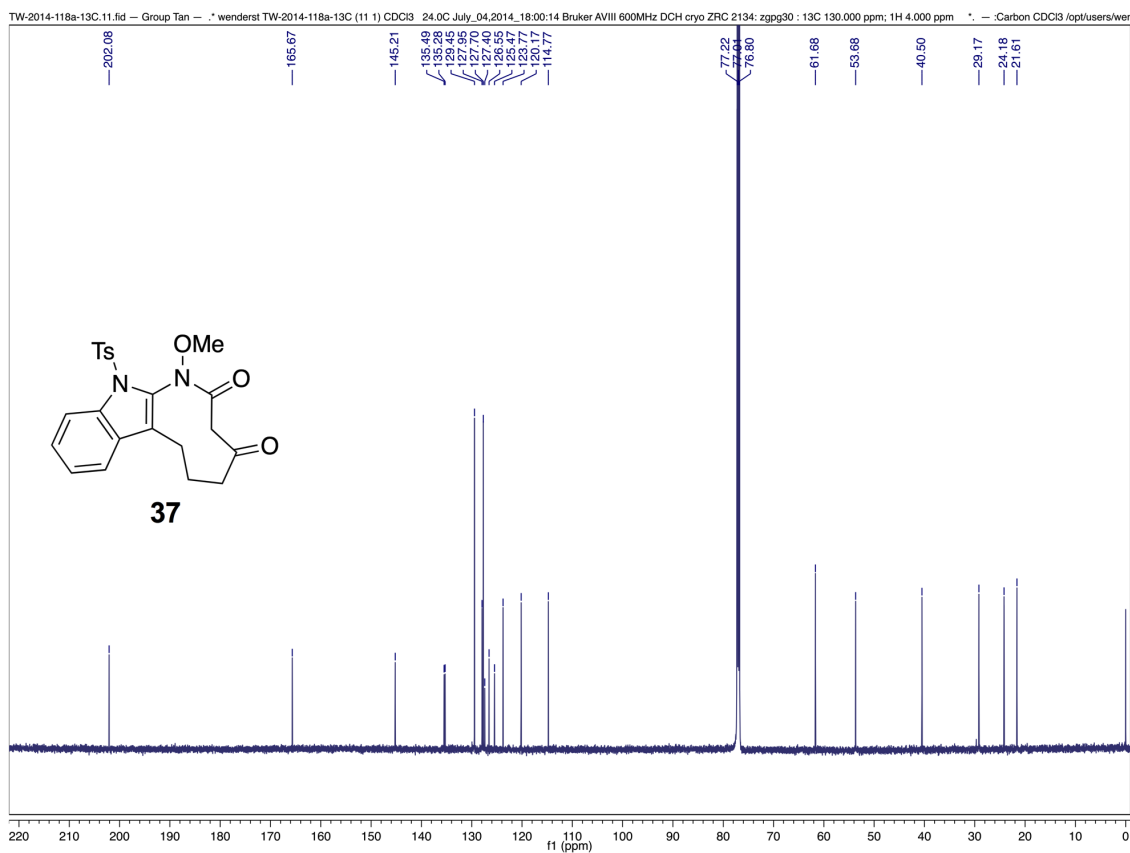

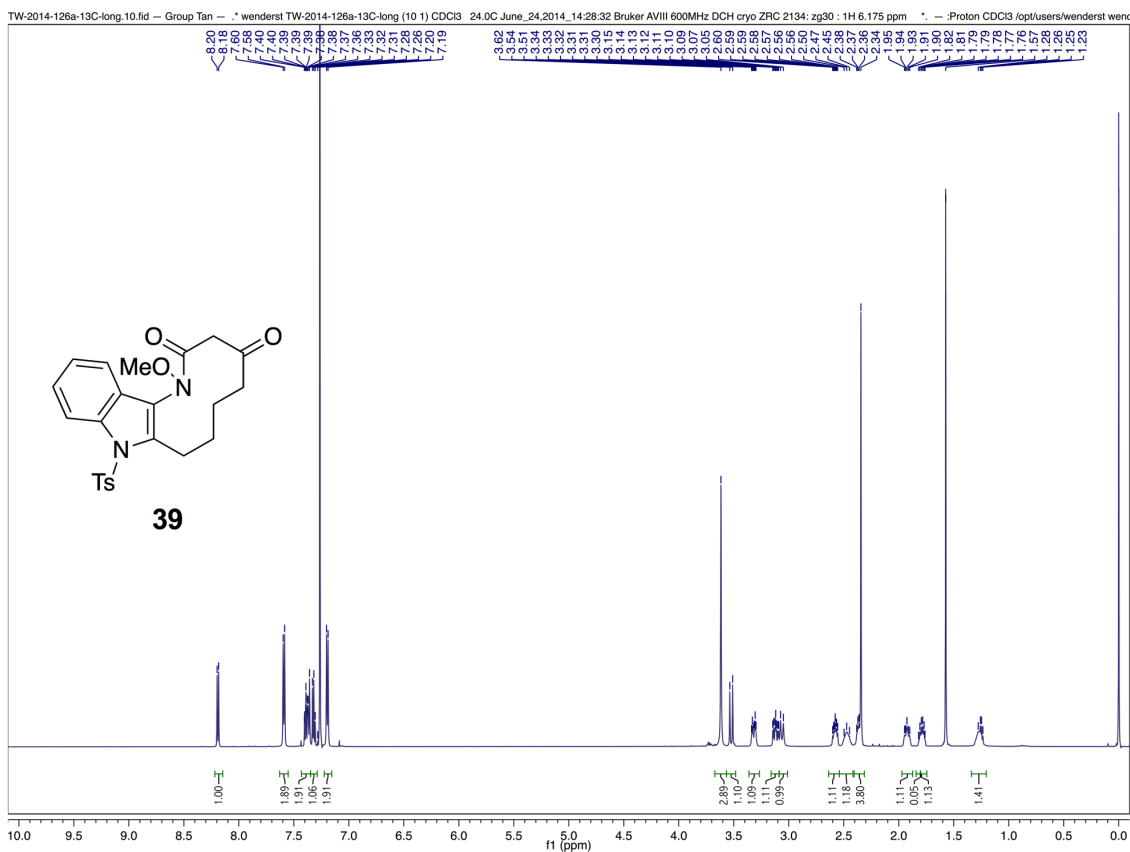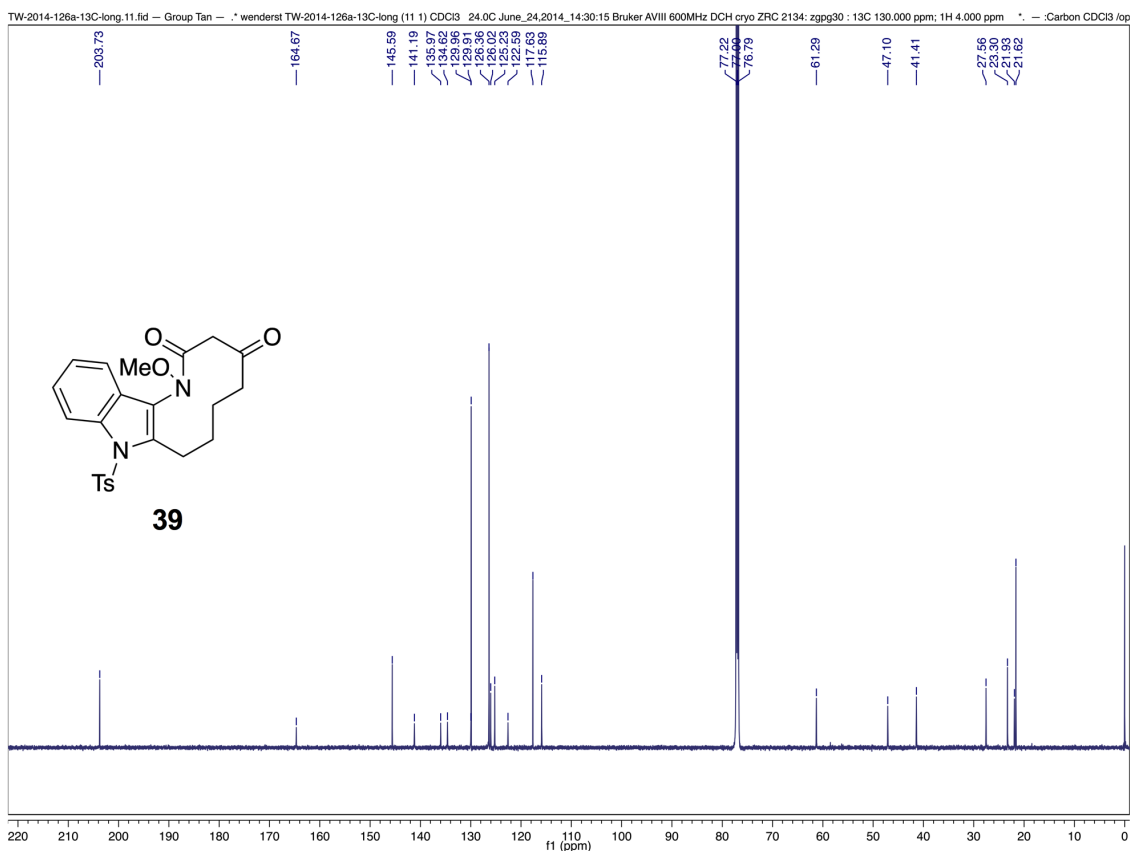

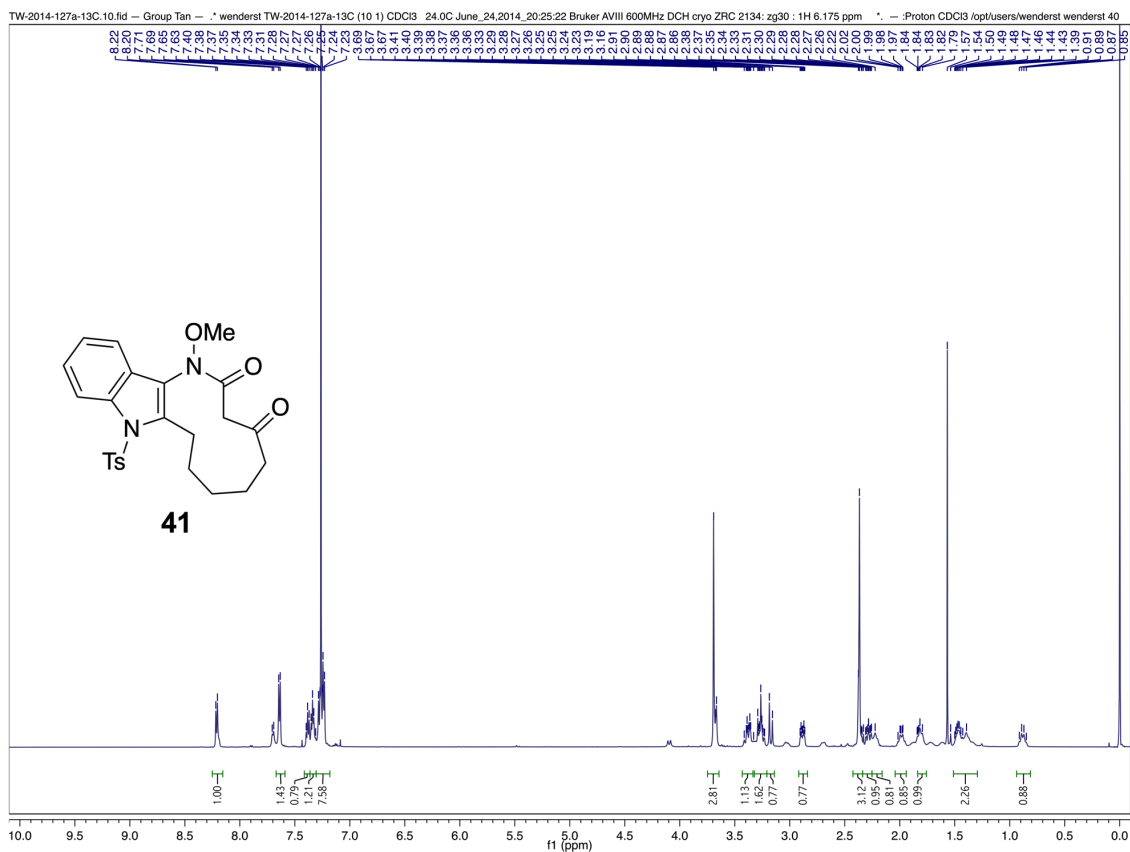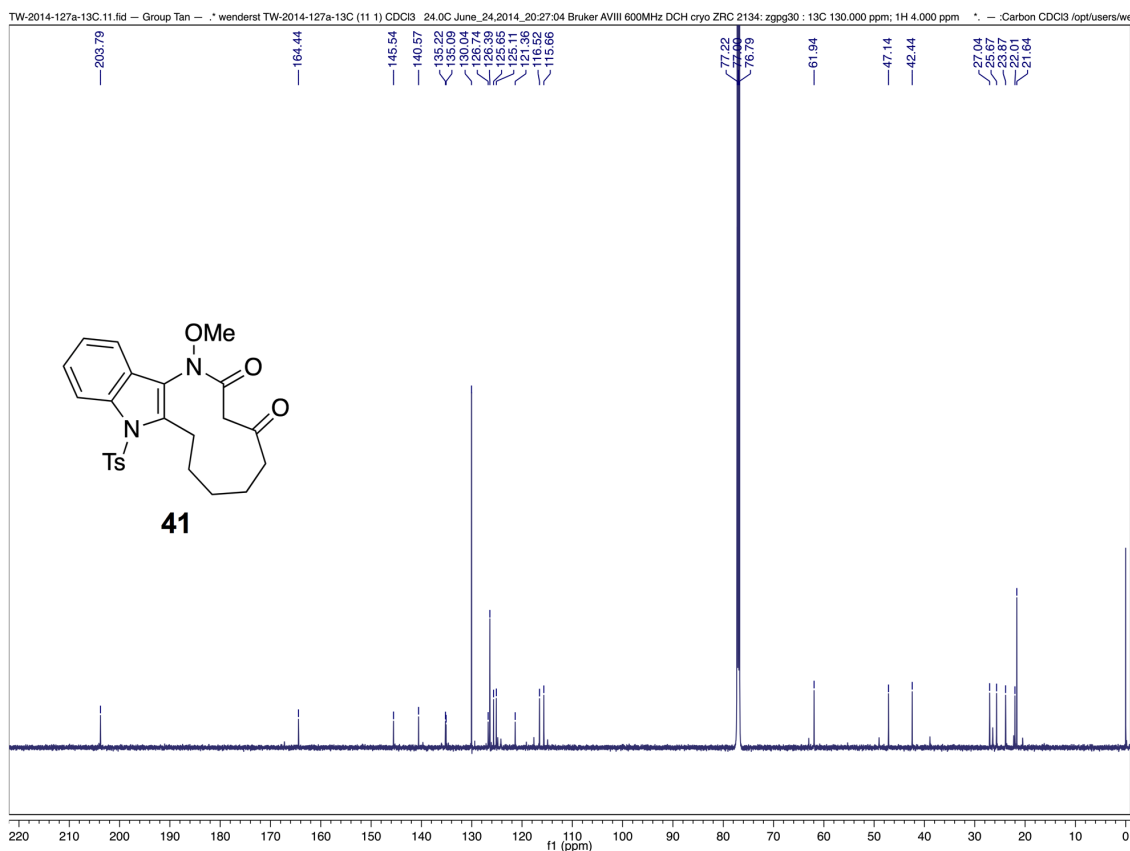

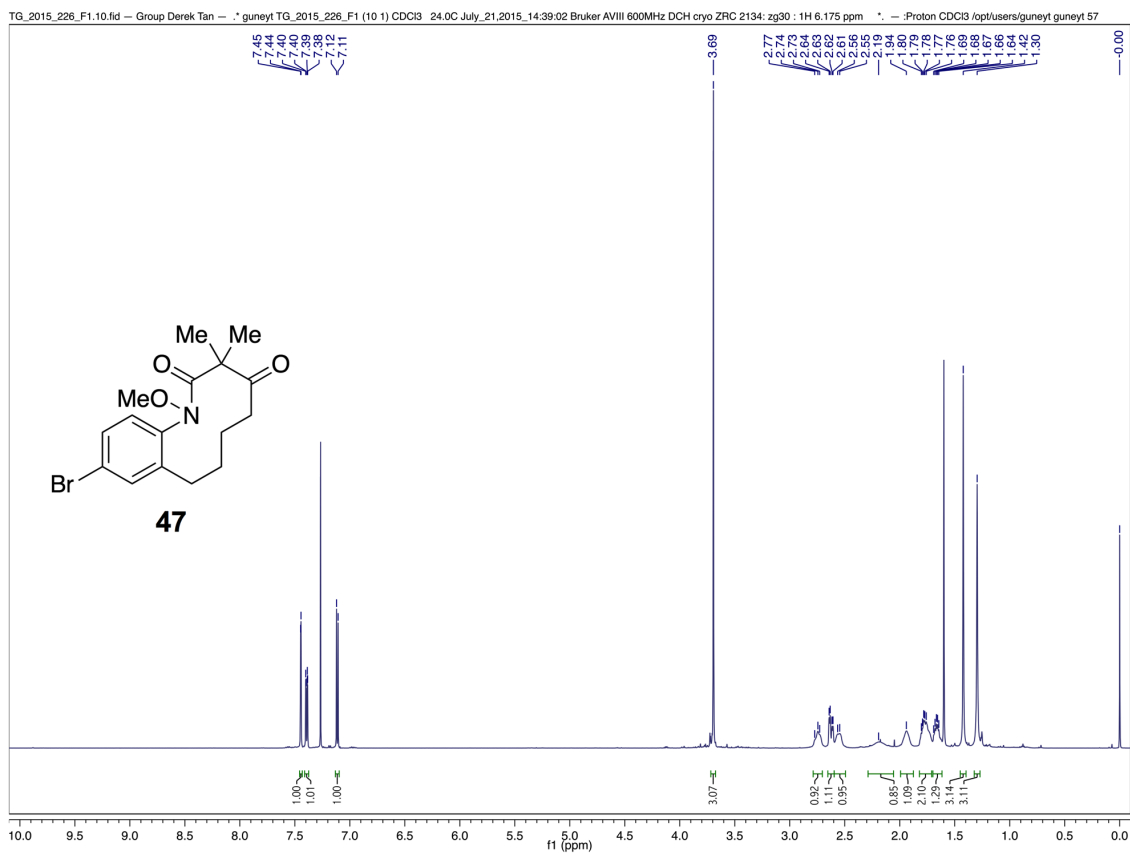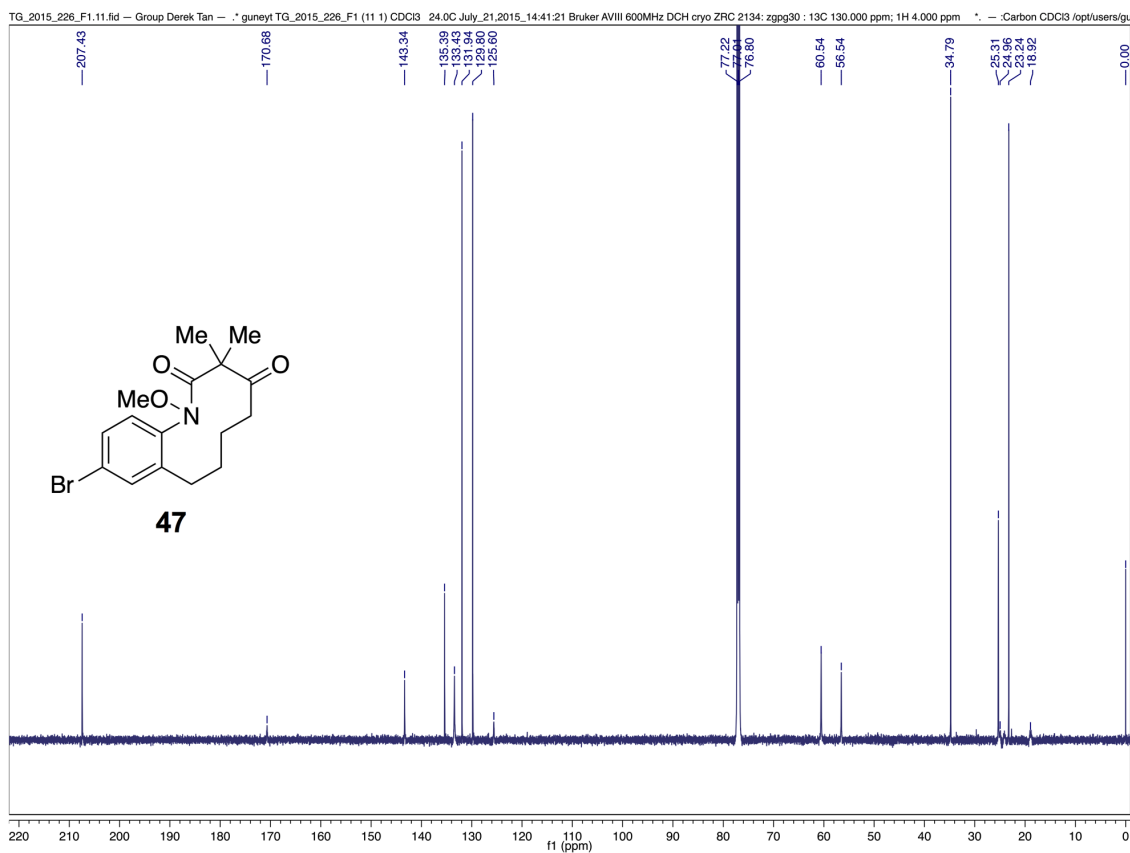

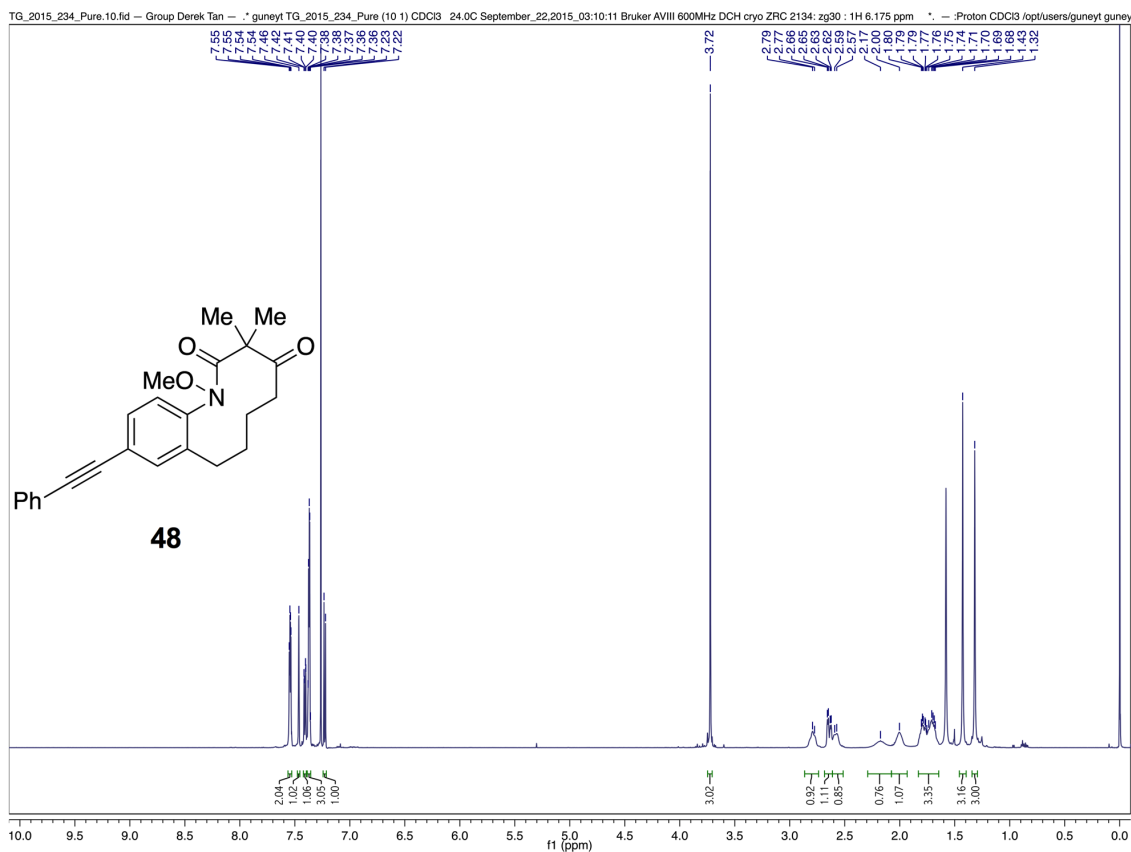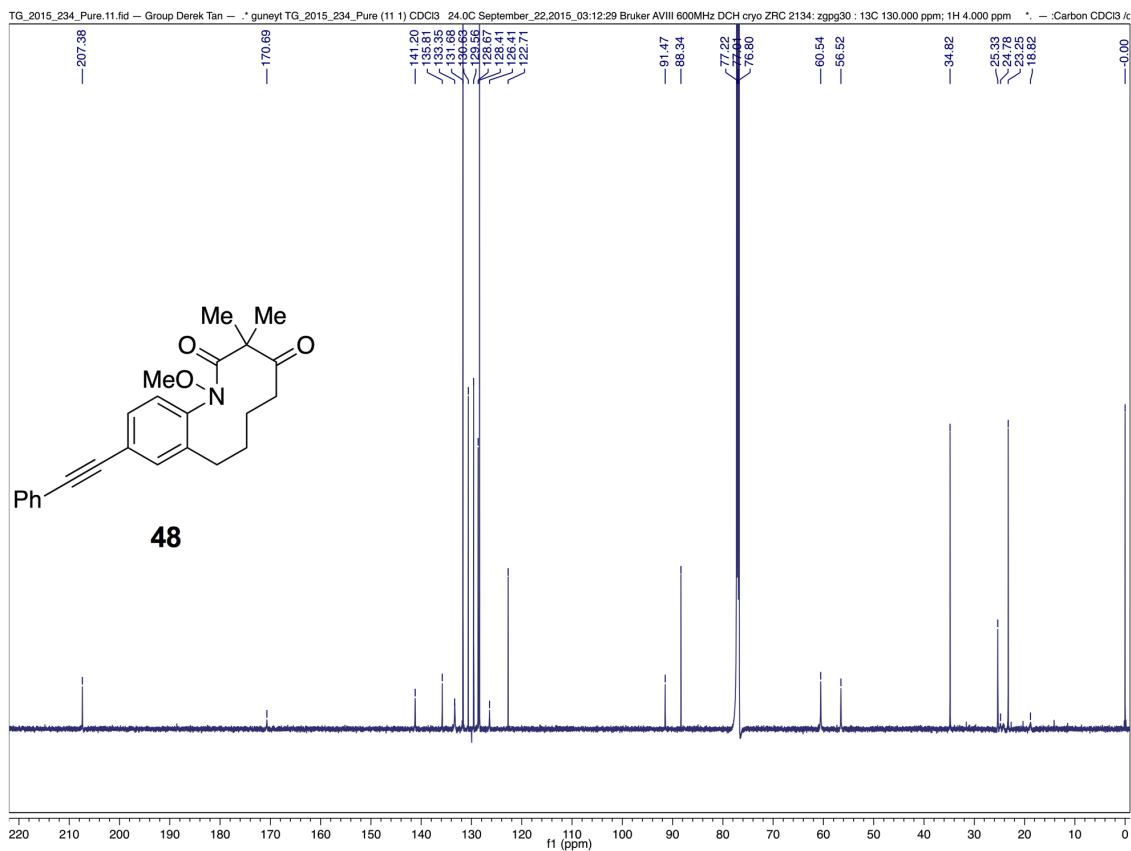

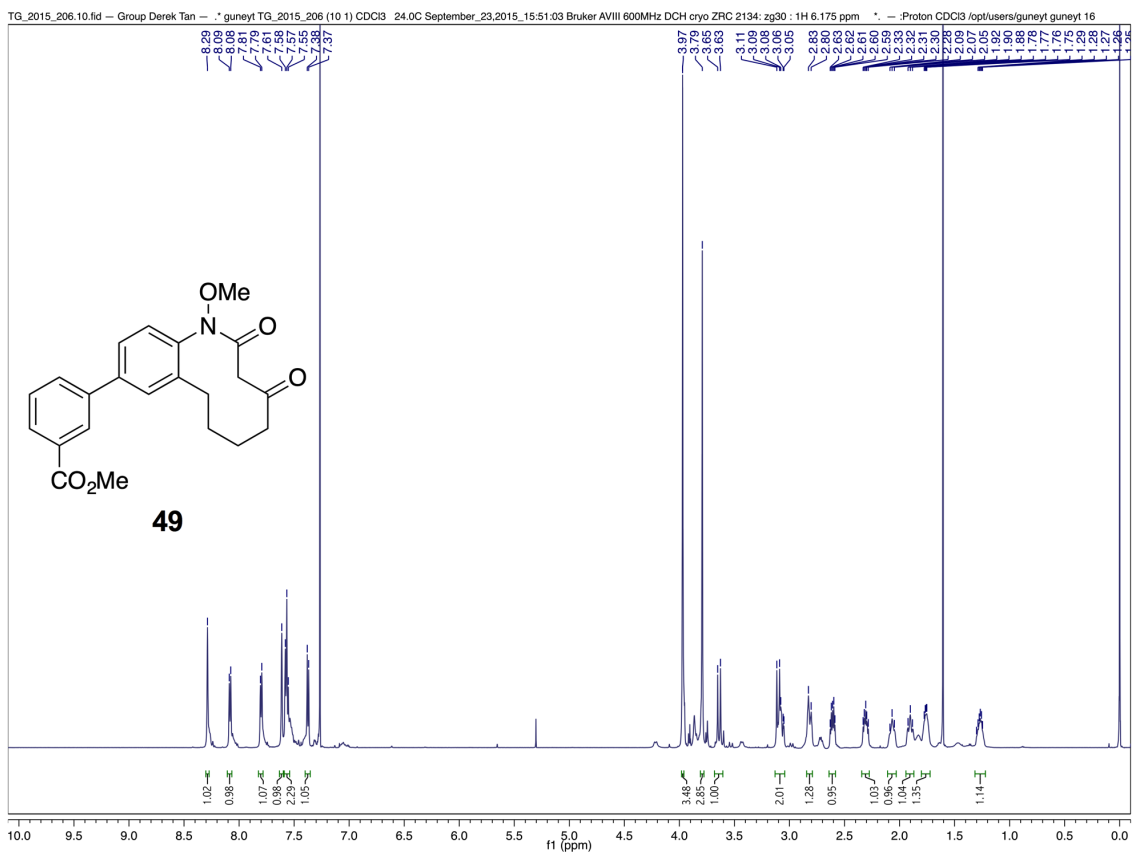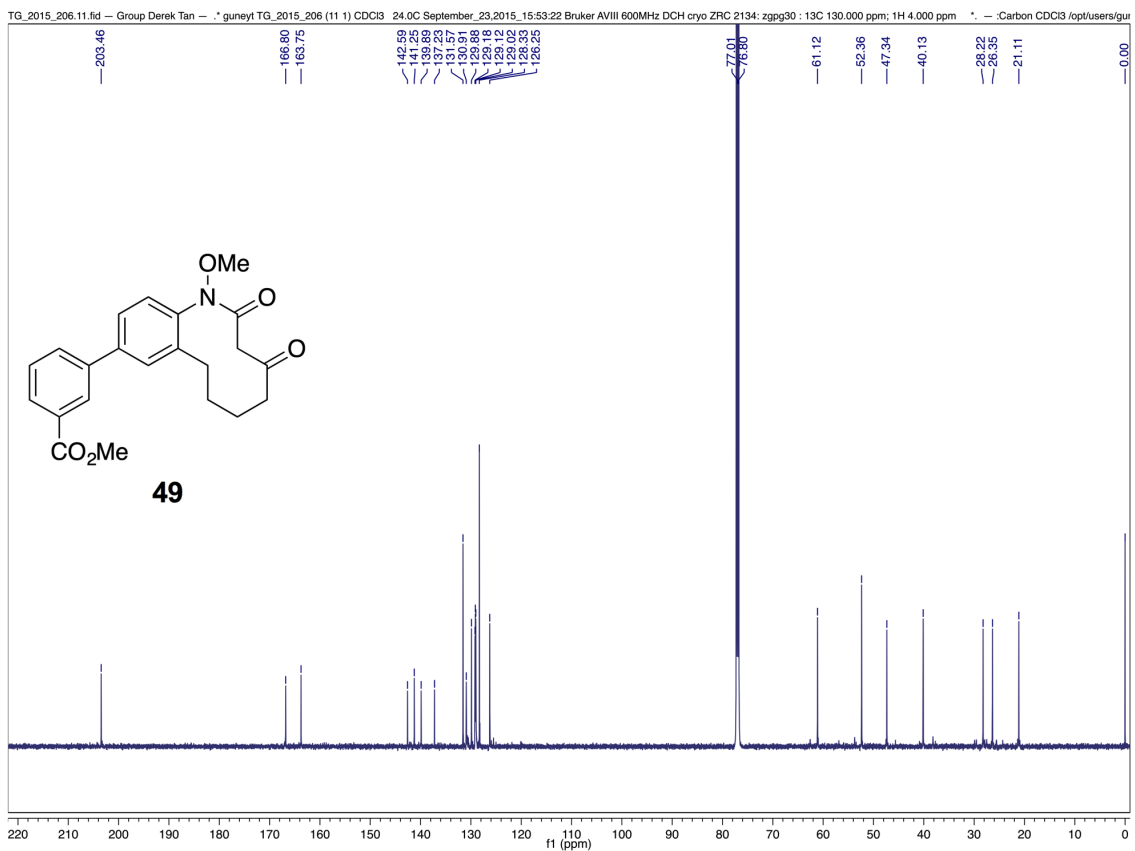



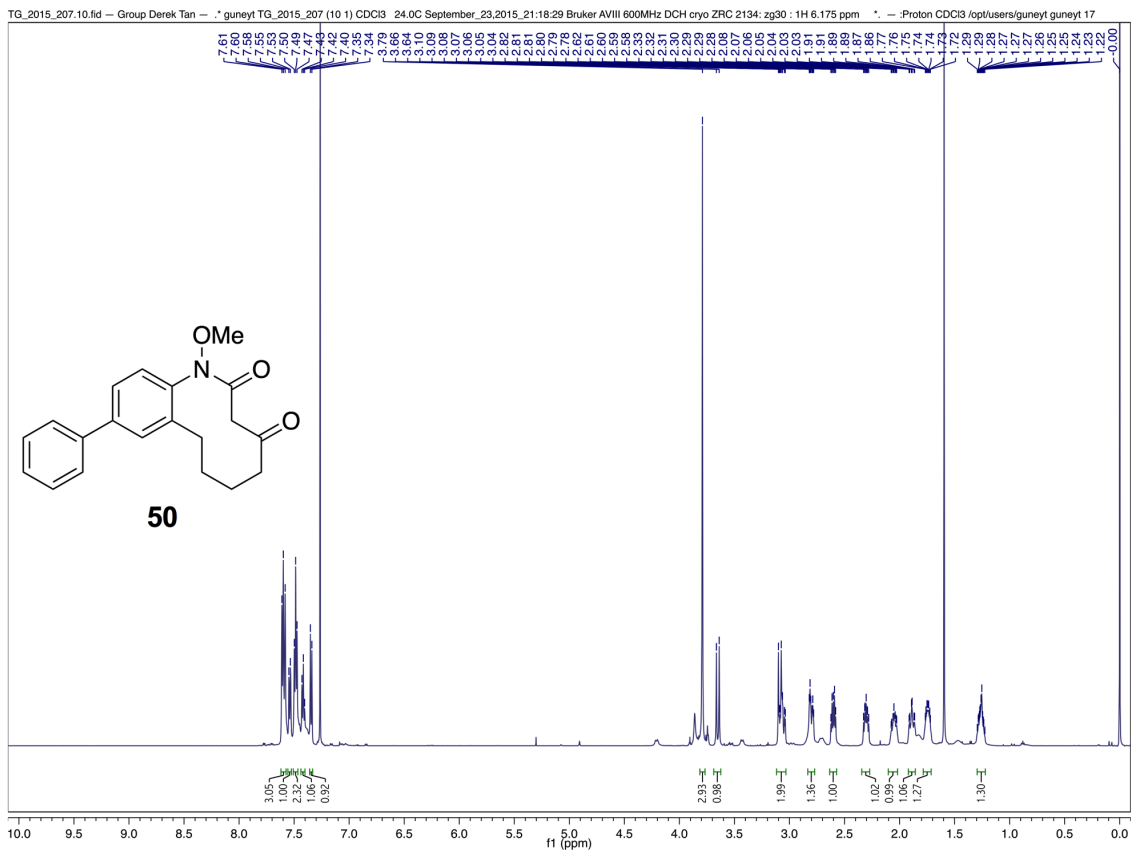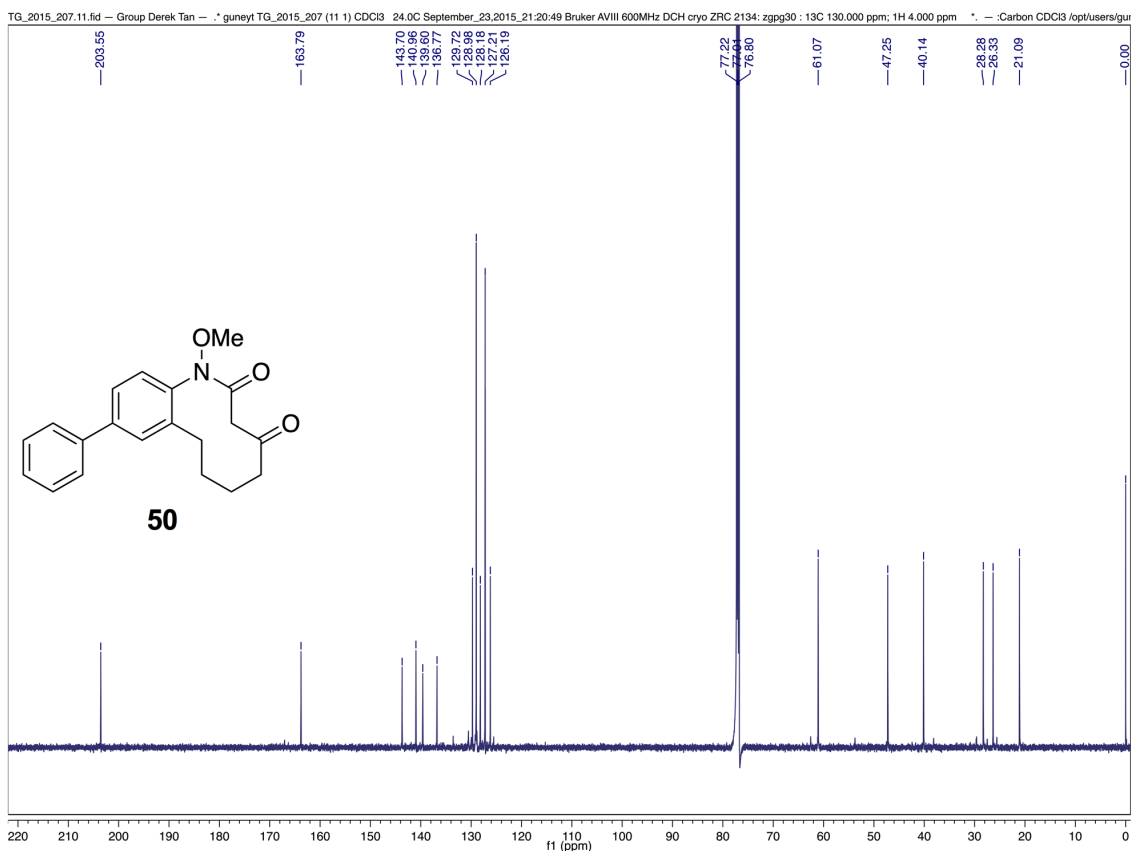

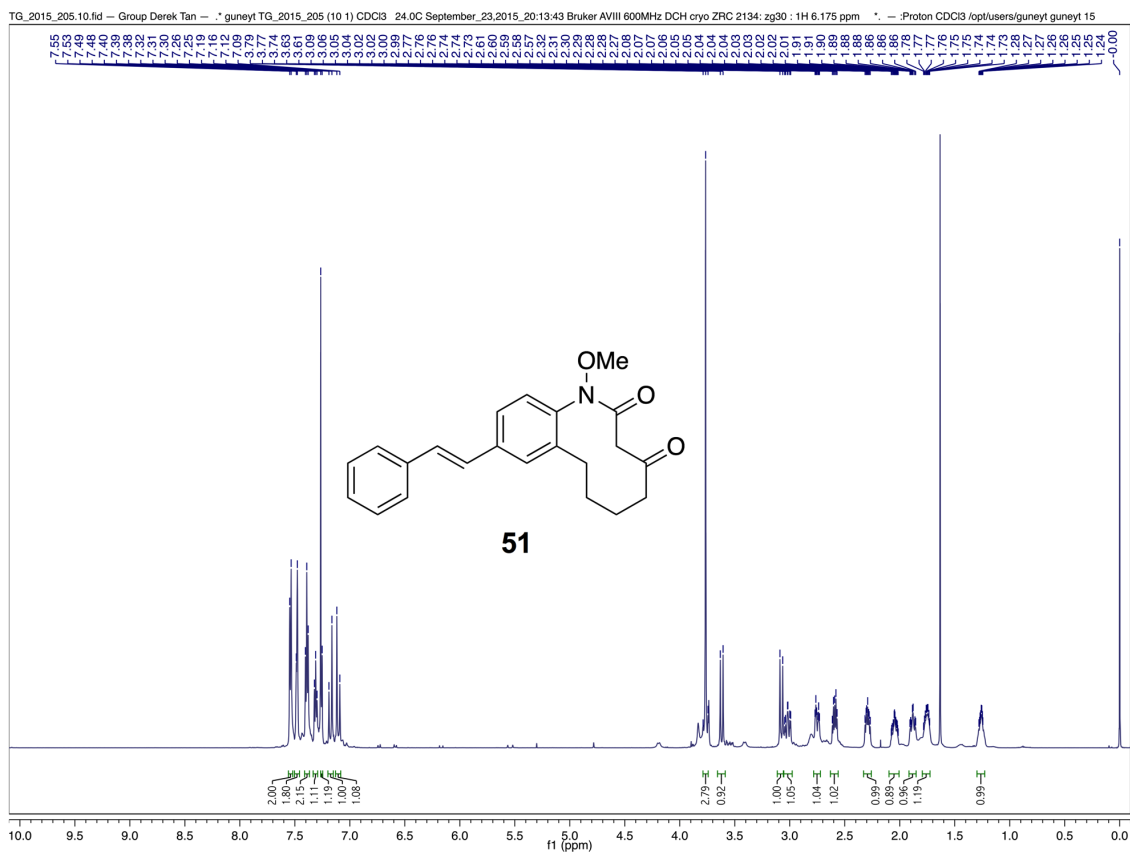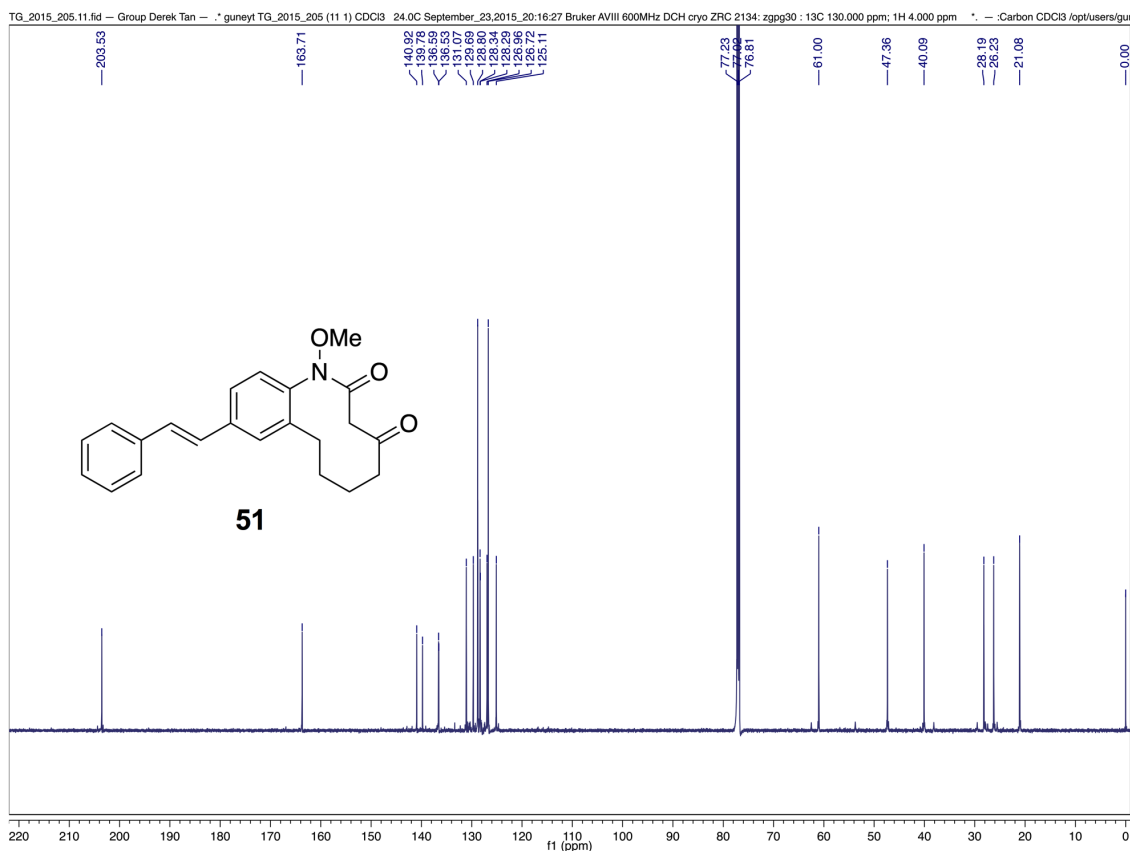

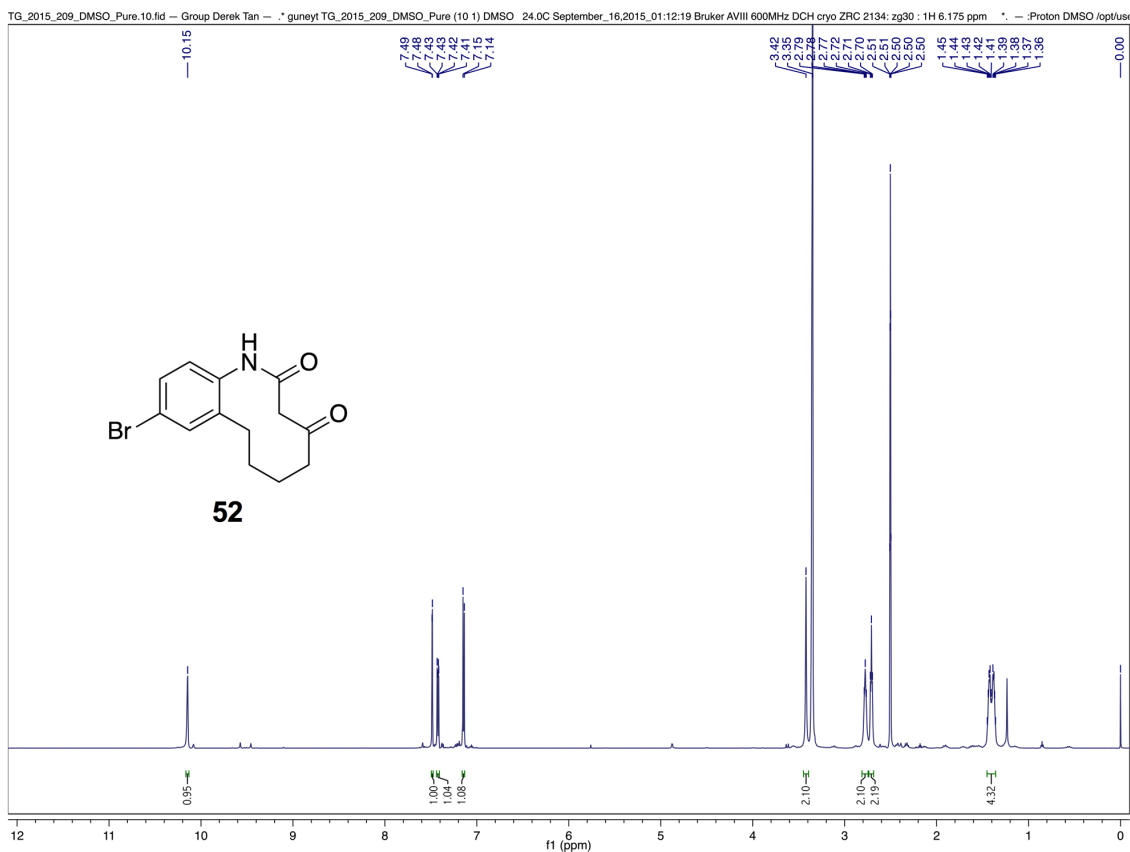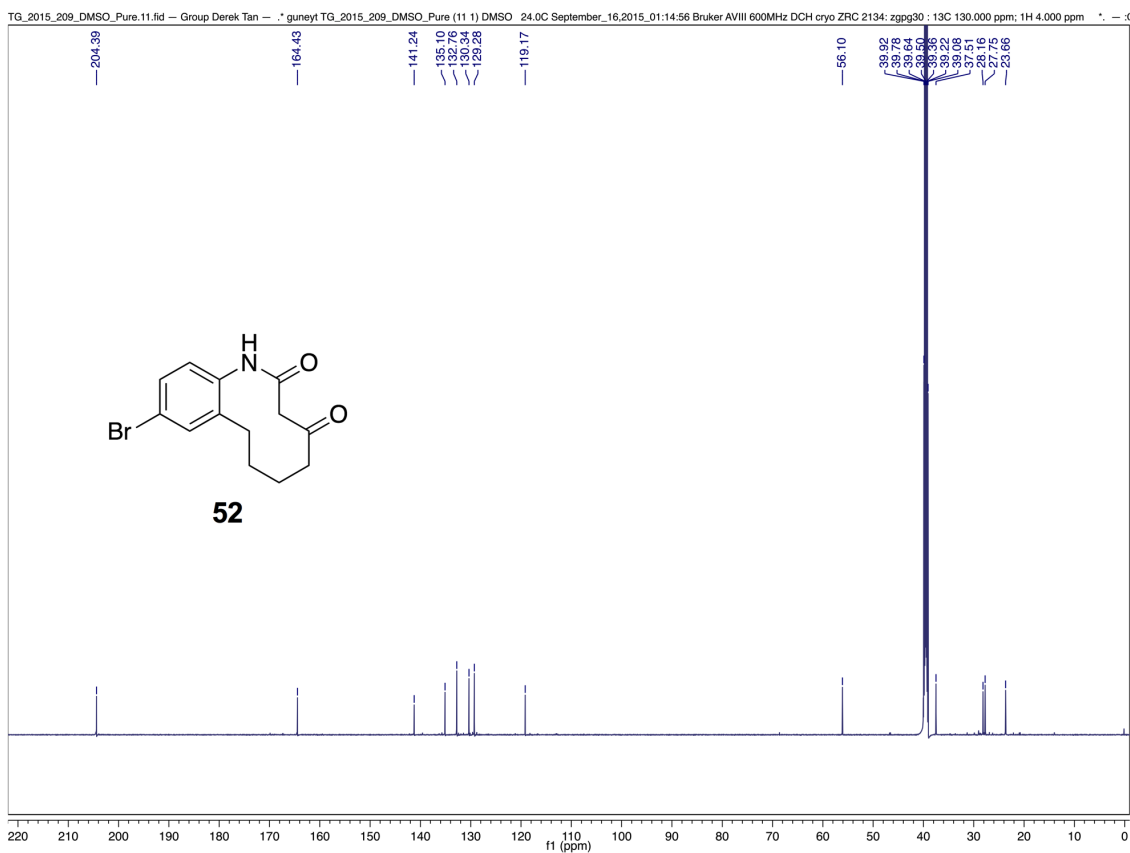

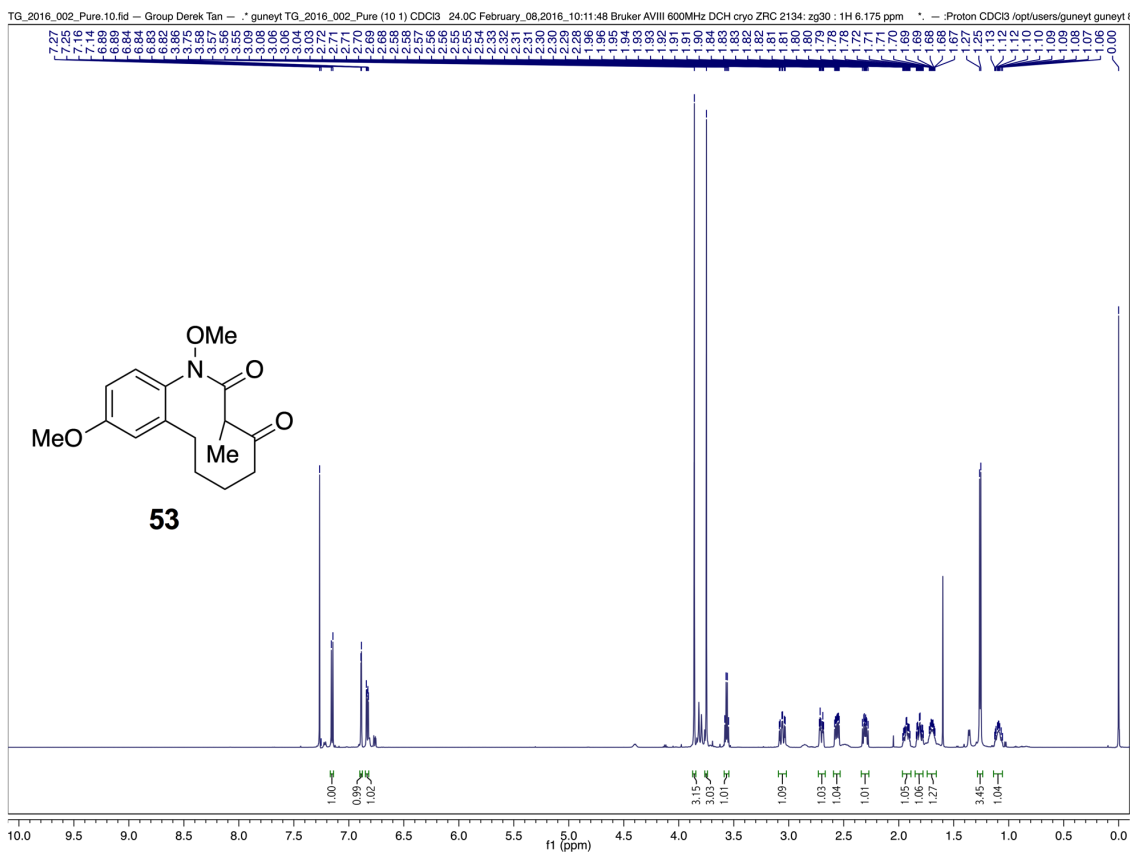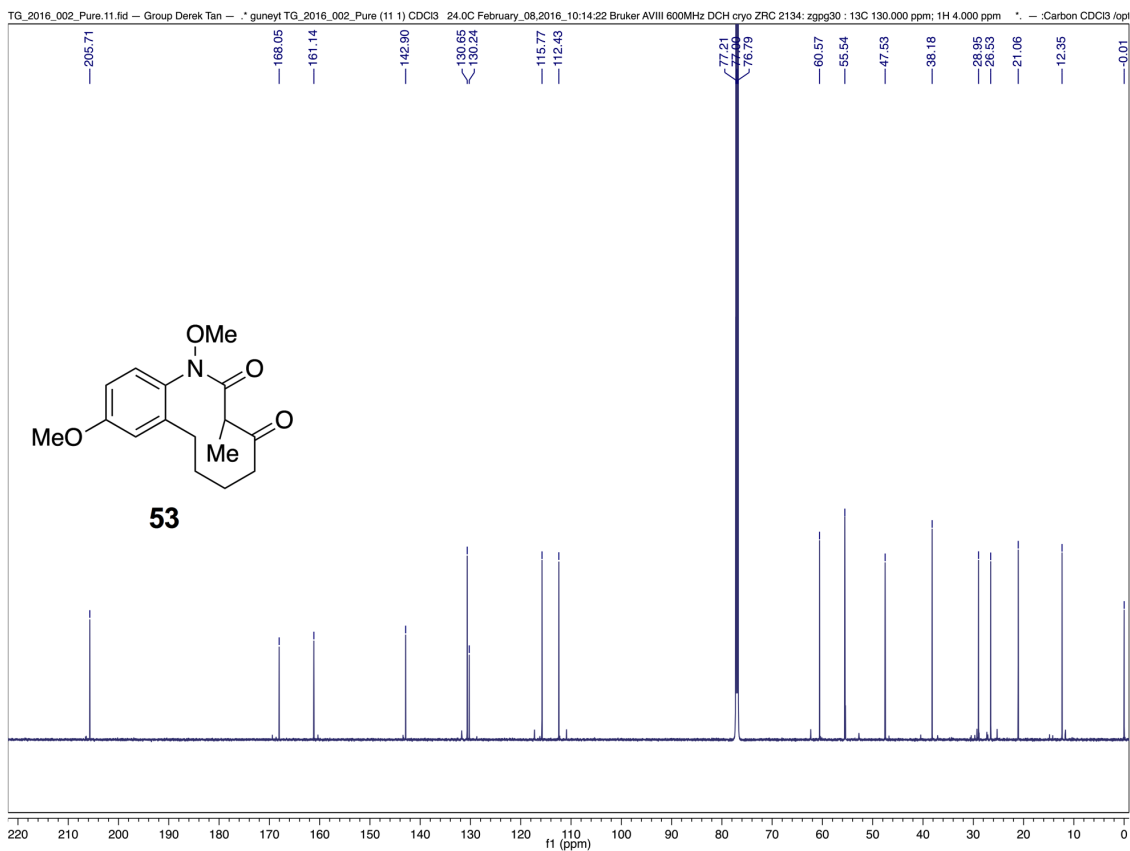

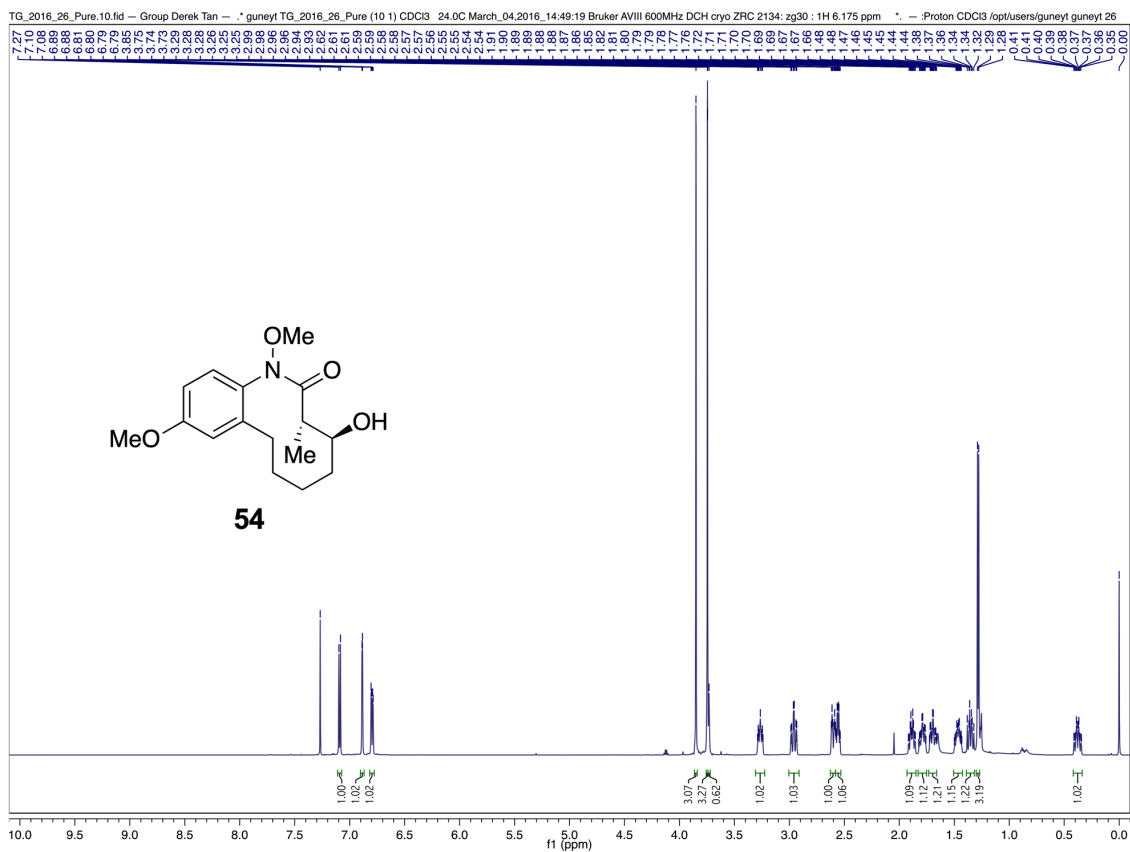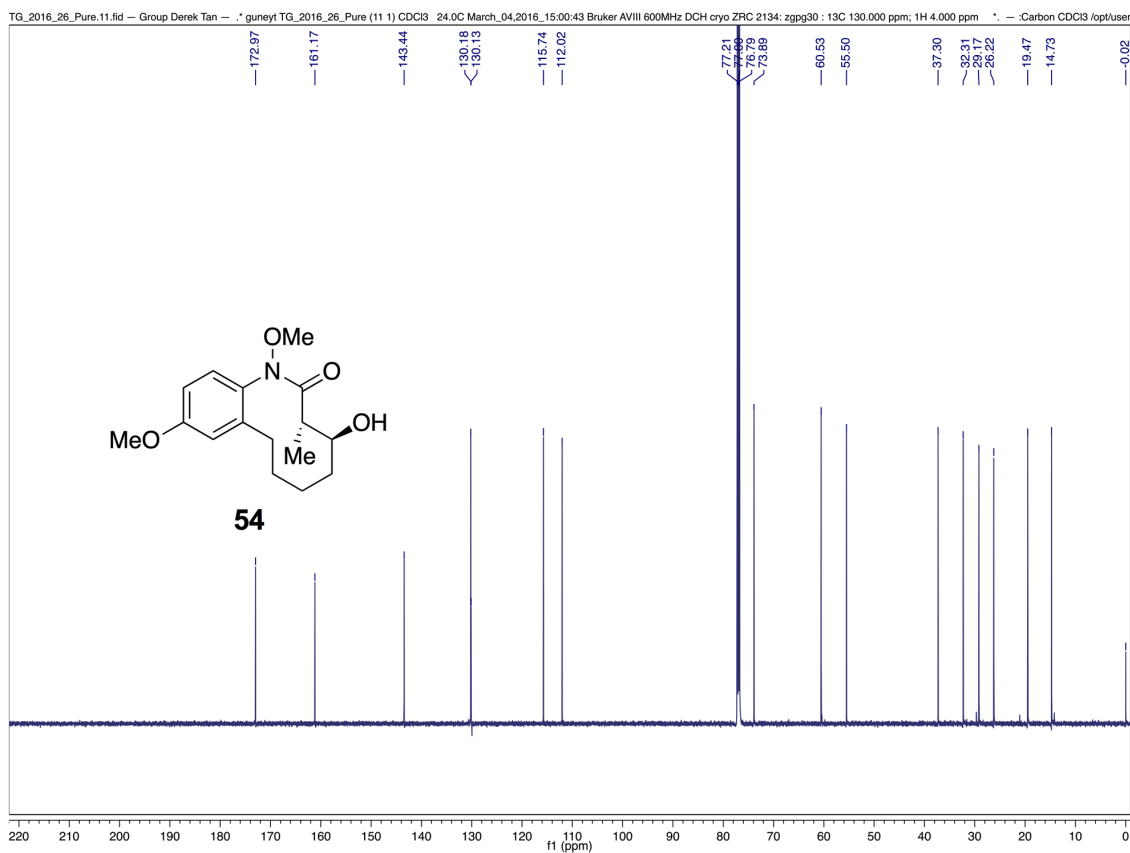



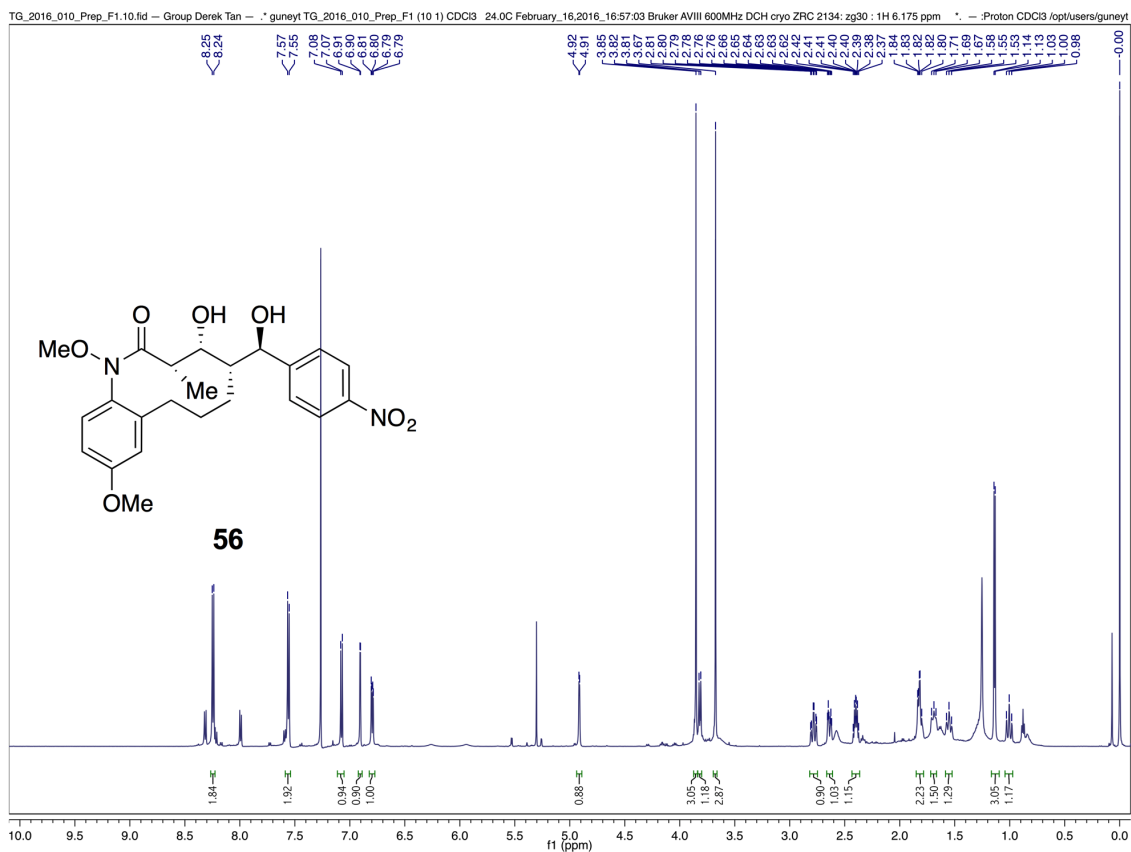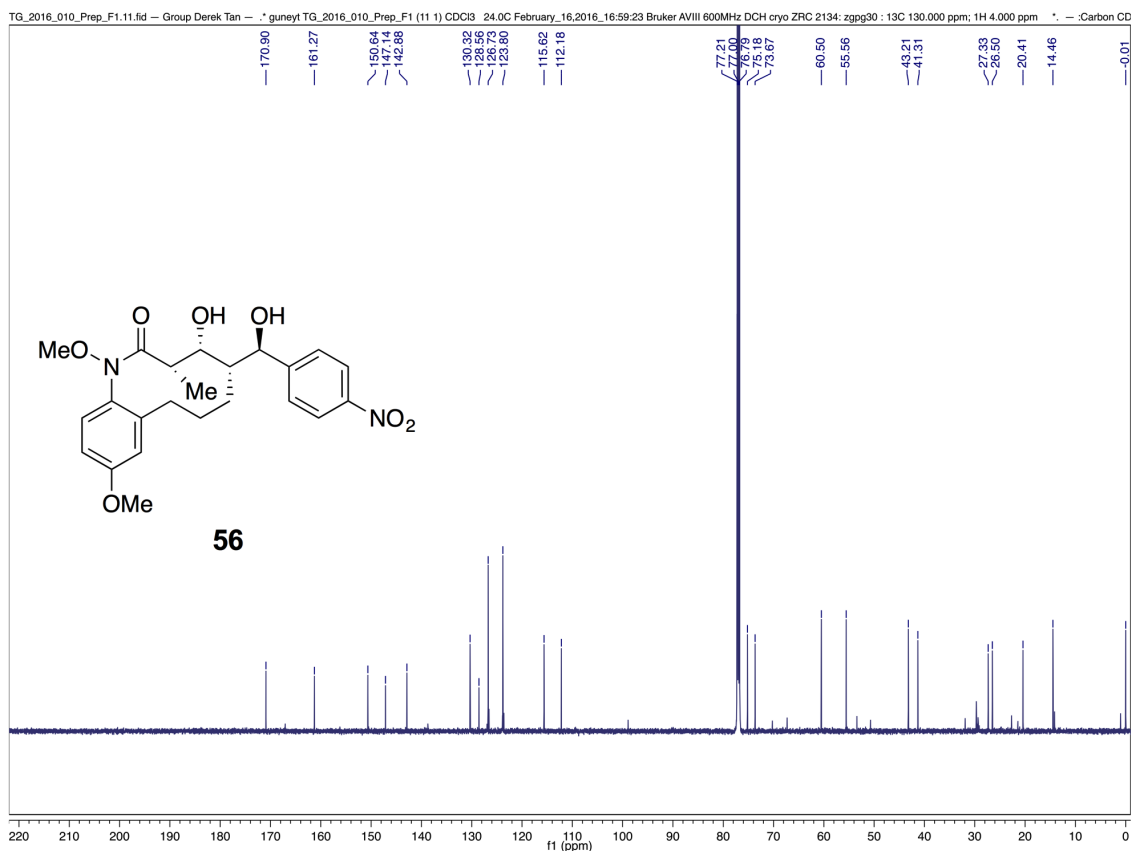

Supplement: NIHMS987306-supplement-Supporting_Information.pdf [file NIHMS987306-supplement-Supporting_Information.pdf]
